# Supplementary material for: Preliminary Study on the Sequencing of Whole Genomic Methylation and Transcriptome-Related Genes in Thyroid Carcinoma
Source: Cancers (Basel). 2022 Feb 24;14(5):1163. doi: 10.3390/cancers14051163 (PMC8909391; doi:10.3390/cancers14051163)
Supplement: Supplementary file 1 [file cancers-14-01163-s001.zip]

Archive with 6 entries (6 files):
- Figures and Table S1.pdf
- Supplementary Table S2.xlsx
- Supplementary Table S3.xlsx
- Supplementary Table S4.xlsx
- Supplementary Table S5.xlsx
- Supplementary Table S6.xlsx
