# Supplementary material for: Preliminary Study on the Sequencing of Whole Genomic Methylation and Transcriptome-Related Genes in Thyroid Carcinoma
Source: Cancers (Basel). 2022 Feb 24;14(5):1163. doi: 10.3390/cancers14051163 (PMC8909391; doi:10.3390/cancers14051163)
Supplement: Supplementary file 1 [file cancers-14-01163-s001.zip › Figures and Table S1.pdf]

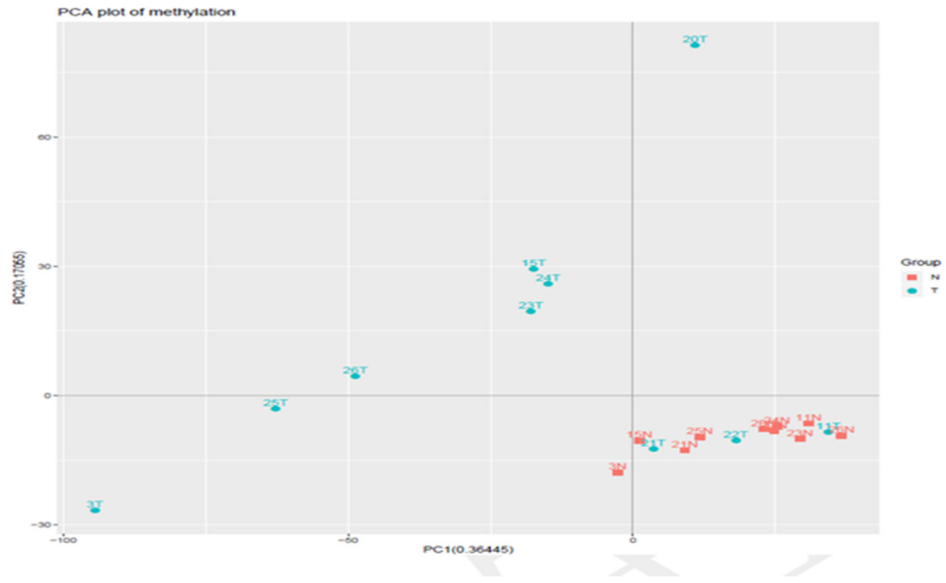

**Figure S1.** The density distribution plot of the methylation degree of each sample probe after normalization (Note: The X-axis is the degree of methylation, and the Y-axis is the probe density corresponding to the degree of methylation. Each curve represents a sample, and the color distinguishes the sample group).

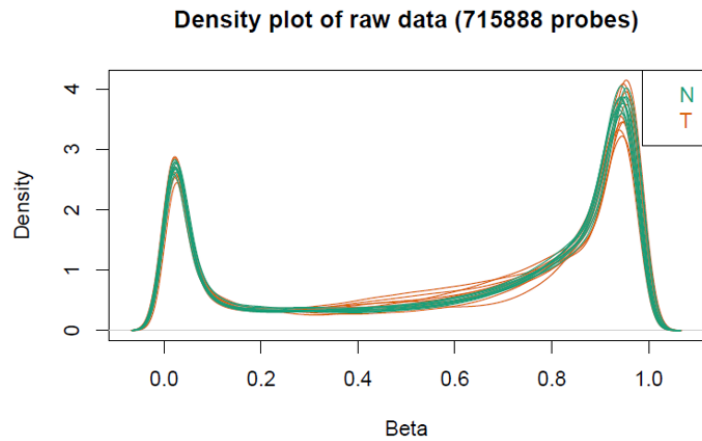

**Figure S2.** PCA analysis results of methylation ratio of each sample (Note: Color distinguishes sample groups; X and Y axes respectively correspond to the indicators that best reflect the accurate species composition of the sample, calculated by the software. The number represents patient's label number, and the following letter, N, represents patients' standard control while the letter T represents patients' thyroid carcinoma).

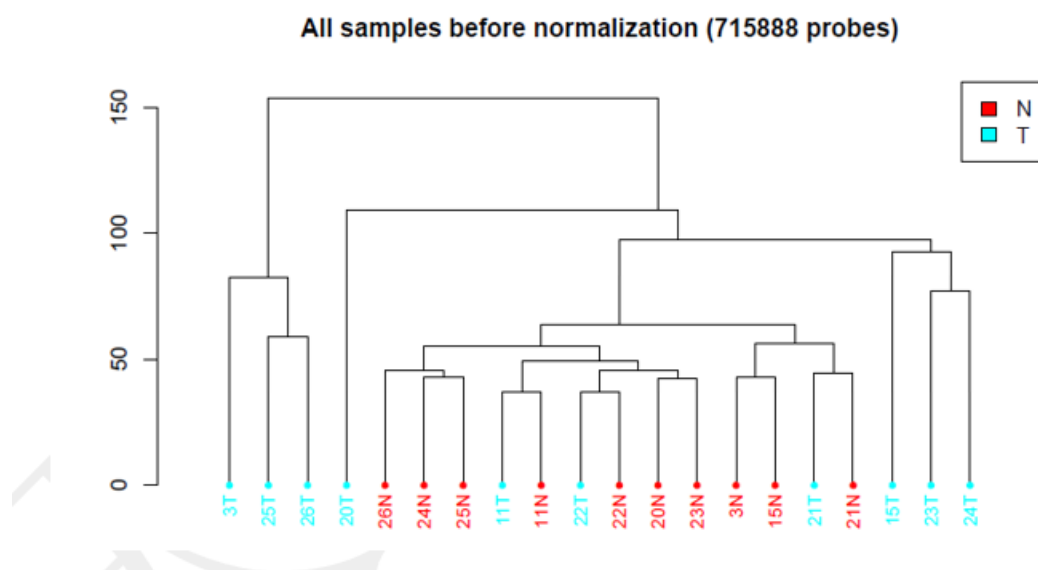

**Figure S3.** Hierarchical clustering results of methylation ratio of each sample. The number represents patient's label number, and the following letter N represents patients' standard control while the letter T represents patients' thyroid carcinoma.

**Table S1.** The number of qualified probes of the sample and the average intensity of all probes' red and green signals (Note: A maximum of 10 samples are displayed. "Sample Name" refers to the name of each sample; "Detected CpG (0.01)" refers to the number of qualified probes for the sample under the condition that the p-value threshold is 0.01, that is, the p-value of the retained probe in all samples is less than 0.01," Detected CpG (0.05)" refers to the number of qualified probes for the sample under the condition that the p-value threshold is 0.05, that is, the p-value of the retained probes in all samples is less than 0.05. "Signal Average GRN" refers to all the samples in each sample. The average intensity of the green signal of the probe, "Signal Average RED," refers to the average intensity of the red signal of all probes for each sample).

| <b>Sample Name</b> | <b>Detected CpG (0.01)</b> | <b>Detected CpG (0.05)</b> | <b>Signal Average GRN</b> | <b>Signal Average RED</b> |
|--------------------|----------------------------|----------------------------|---------------------------|---------------------------|
| 11N                | 864526                     | 864823                     | 3490.015                  | 3989.75                   |
| 11T                | 863875                     | 864324                     | 4396.385                  | 4715.449                  |
| 15N                | 864141                     | 864519                     | 4732.551                  | 5146.454                  |
| 15T                | 864169                     | 864459                     | 5191.302                  | 5789.714                  |
| 20N                | 864345                     | 864724                     | 5465.038                  | 6290.317                  |
| 20T                | 864031                     | 864742                     | 5347.888                  | 6133.555                  |
| 21N                | 864438                     | 864728                     | 3007.487                  | 3997.931                  |
| 21T                | 864178                     | 864669                     | 3021.422                  | 4119.732                  |
| 22N                | 864300                     | 864615                     | 3287.029                  | 4167.541                  |
| 22T                | 863867                     | 864440                     | 3591.352                  | 4357.978                  |
