# Supplementary material for: Preliminary Study on the Sequencing of Whole Genomic Methylation and Transcriptome-Related Genes in Thyroid Carcinoma
Source: Cancers (Basel). 2022 Feb 24;14(5):1163. doi: 10.3390/cancers14051163 (PMC8909391; doi:10.3390/cancers14051163)
Supplement: Supplementary file 1 [file cancers-14-01163-s001.zip › Supplementary Table S2.xlsx]

## Sheet: Summary
Grpup	All	Up	Down
TUMOR_vs_NORMAL	1627	1174	453

## Sheet: TUMOR_vs_NORMAL
gene_id	3N	11N	15N	20N	21N	22N	23N	24N	25N	26N	3T	11T	15T	20T	21T	22T	23T	24T	25T	26T	baseMeanA	baseMeanB	baseMean	log2FoldChange	lfcSE	stat	pvalue	padj	type	GO_BP	GO_MF	GO_CC	KEGG_PATHWAY
RNF14	3559.63	4448.66	3982.01	3094.24	4603.62	4398.11	4539.24	5221.74	3847.1	4531.77	4365.99	4156.65	3921.53	4492.91	4461.47	4758.4	4918.61	3676.09	3636.86	4047.25	4222.61	4243.58	4233.09	0.00739573	0.091401	0.0809151	0.935509	0.968556	Not DEG	GO:0000209,protein polyubiquitination|GO:0006351,transcription, DNA-templated|GO:0006355,regulation of transcription, DNA-templated|GO:0006357,regulation of transcription from RNA polymerase II promoter|GO:0007165,signal transduction|GO:0016567,protein ubiquitination|GO:0030521,androgen receptor signaling pathway|GO:0032436,positive regulation of proteasomal ubiquitin-dependent protein catabolic …	GO:0003713,transcription coactivator activity|GO:0003713,transcription coactivator activity|GO:0005515,protein binding|GO:0019787,ubiquitin-like protein transferase activity|GO:0031624,ubiquitin conjugating enzyme binding|GO:0046872,metal ion binding|GO:0050681,androgen receptor binding|GO:0061630,ubiquitin protein ligase activity	GO:0000151,ubiquitin ligase complex|GO:0005634,nucleus|GO:0005737,cytoplasm|GO:0005829,cytosol
HIF3A	1447.32	373.597	363.147	2045.74	525.221	1233.77	2179.12	942.047	999.138	538.933	344.62	471.609	28.6783	269.238	454.735	1658.86	1853.57	854.904	989.545	639.699	1064.8	756.546	910.675	-0.493161	0.47098	-1.0471	0.295056	0.510315	Not DEG	GO:0001525,angiogenesis|GO:0006366,transcription from RNA polymerase II promoter|GO:0006915,apoptotic process|GO:0016567,protein ubiquitination|GO:0043687,post-translational protein modification|GO:0045944,positive regulation of transcription from RNA polymerase II promoter|GO:0061418,regulation of transcription from RNA polymerase II promoter in response to hypoxia	GO:0000981,RNA polymerase II transcription factor activity, sequence-specific DNA binding|GO:0003677,DNA binding|GO:0046983,protein dimerization activity	GO:0005634,nucleus|GO:0005654,nucleoplasm|GO:0005654,nucleoplasm|GO:0005739,mitochondrion|GO:0005829,cytosol|GO:0005829,cytosol|GO:0005886,plasma membrane|GO:0016607,nuclear speck
UBE2Q2	3606.57	4117.34	4214.02	2819.74	4580.12	3843.38	4322.52	3779.23	3489.55	3715.18	4757.44	4289.35	3455.27	3372.21	4376.69	4528.44	3345.75	3547.31	3287.74	3299.9	3848.76	3826.01	3837.39	-0.00846824	0.100925	-0.0839066	0.933131	0.967294	Not DEG	GO:0016567,protein ubiquitination|GO:0070936,protein K48-linked ubiquitination	GO:0004842,ubiquitin-protein transferase activity|GO:0005524,ATP binding	GO:0005829,cytosol	path:hsa04120 Ubiquitin mediated proteolysis - Homo sapiens (human)
RNF10	7599.41	7729.93	8827.33	10428.5	8176.77	8426.68	7411.39	9519.83	8378.73	8671.18	8740.39	7447.41	9599.83	9193.81	8293.13	7414.74	7647.26	8488.44	7254.81	7890.45	8516.97	8197.03	8357	-0.0551888	0.0748383	-0.737441	0.460854	0.667926	Not DEG	GO:0006351,transcription, DNA-templated|GO:0010626,negative regulation of Schwann cell proliferation|GO:0031643,positive regulation of myelination|GO:0045893,positive regulation of transcription, DNA-templated|GO:0045944,positive regulation of transcription from RNA polymerase II promoter|GO:0051865,protein autoubiquitination	GO:0004842,ubiquitin-protein transferase activity|GO:0005515,protein binding|GO:0044212,transcription regulatory region DNA binding|GO:0046872,metal ion binding	GO:0005634,nucleus|GO:0005737,cytoplasm
RNF11	6352.56	9865.39	9298.92	6586.33	9679.58	8990.72	7472.12	9681.74	6936.17	7602.42	8499.03	8438.36	9180.76	10980.2	11793.4	10310.9	9118.98	6984.24	6725.57	8327.35	8246.59	9035.87	8641.23	0.131948	0.120886	1.0915	0.275051	0.488278	Not DEG	GO:0042787,protein ubiquitination involved in ubiquitin-dependent protein catabolic process|GO:0043161,proteasome-mediated ubiquitin-dependent protein catabolic process|GO:0051865,protein autoubiquitination	GO:0003677,DNA binding|GO:0004842,ubiquitin-protein transferase activity|GO:0005515,protein binding|GO:0008270,zinc ion binding|GO:0061630,ubiquitin protein ligase activity	GO:0000151,ubiquitin ligase complex|GO:0005634,nucleus|GO:0005769,early endosome|GO:0055037,recycling endosome|GO:0070062,extracellular exosome
RNF13	8547.99	8452.96	6882.14	4890.67	6540	7309.61	7013.67	7341.35	7304.45	7213.69	8871.27	7414	6356.41	8579.94	6688.9	8030.91	6807.42	5636.96	8890.34	6669.89	7149.65	7394.6	7272.13	0.0486303	0.106879	0.455003	0.649107	0.804591	Not DEG	GO:0051865,protein autoubiquitination	GO:0004842,ubiquitin-protein transferase activity|GO:0005515,protein binding|GO:0046872,metal ion binding|GO:0061630,ubiquitin protein ligase activity	GO:0000139,Golgi membrane|GO:0005637,nuclear inner membrane|GO:0005654,nucleoplasm|GO:0005765,lysosomal membrane|GO:0005765,lysosomal membrane|GO:0005789,endoplasmic reticulum membrane|GO:0005829,cytosol|GO:0016021,integral component of membrane|GO:0031902,late endosome membrane|GO:0043231,intracellular membrane-bounded organelle
C1orf195	63.5648	25.0215	30.2622	19.9796	63.4496	32.1339	53.5849	73.5975	29.7264	43.6973	74.4476	63.0085	57.3566	35.674	45.1432	49.1368	70.4607	80.0797	46.6976	56.3336	43.5018	57.8338	50.6678	0.419048	0.254023	1.64965	0.0990154	0.250876	Not DEG
REM1	114.417	93.1836	122.73	106.848	69.3245	49.892	101.216	52.7448	119.731	63.7252	62.4399	135.564	49.0306	41.7319	47.3453	50.1195	81.8254	156.913	116.744	77.6151	89.3812	81.9328	85.657	-0.128782	0.278929	-0.461702	0.644295	0.801173	Not DEG	GO:0007165,signal transduction|GO:1901842,negative regulation of high voltage-gated calcium channel activity	GO:0003924,GTPase activity|GO:0005516,calmodulin binding|GO:0005525,GTP binding	GO:0016020,membrane
REM2	33.2493	37.9637	70.6119	10.4242	28.1998	29.597	78.5912	25.7591	16.5147	41.8766	8.40537	46.779	10.1762	36.3471	16.5158	13.7583	14.774	42.2041	35.5792	23.7853	37.2787	24.8324	31.0556	-0.58034	0.397538	-1.45983	0.144336	0.320141	Not DEG	GO:0007165,signal transduction|GO:1901842,negative regulation of high voltage-gated calcium channel activity	GO:0003924,GTPase activity|GO:0005525,GTP binding	GO:0005886,plasma membrane
SYNGR2	1799.37	1313.2	2128.44	1658.31	1442.89	1215.17	851.405	1484.22	1952.86	1127.94	2243.03	1454.92	2414.53	2871.42	1456.69	1015.17	1518.32	2129.69	2441.62	2968.15	1497.38	2051.35	1774.37	0.453997	0.199155	2.27961	0.0226306	0.0914939	Not DEG	GO:0045055,regulated exocytosis|GO:0048499,synaptic vesicle membrane organization	GO:0005515,protein binding	GO:0005811,lipid droplet|GO:0016021,integral component of membrane|GO:0030054,cell junction|GO:0030672,synaptic vesicle membrane|GO:0030672,synaptic vesicle membrane|GO:0031594,neuromuscular junction|GO:0070062,extracellular exosome
RPEL1	0	3.45125	5.04371	0	2.34998	0	3.57233	0	3.30294	0	0	0	0	2.01929	0	0	0	0	0	0	1.77202	0.201929	0.986974	-2.37341	1.98315	-1.19679	0.231388	NA	Not DEG	GO:0006098,pentose-phosphate shunt|GO:0009052,pentose-phosphate shunt, non-oxidative branch|GO:0019323,pentose catabolic process|GO:0044262,cellular carbohydrate metabolic process	GO:0004750,ribulose-phosphate 3-epimerase activity|GO:0004750,ribulose-phosphate 3-epimerase activity|GO:0046872,metal ion binding	GO:0005829,cytosol|GO:0005829,cytosol	path:hsa00030 Pentose phosphate pathway - Homo sapiens (human)|path:hsa00040 Pentose and glucuronate interconversions - Homo sapiens (human)|path:hsa01100 Metabolic pathways - Homo sapiens (human)|path:hsa01200 Carbon metabolism - Homo sapiens (human)|path:hsa01230 Biosynthesis of amino acids - Homo sapiens (human)
MVB12B	2369.5	2050.04	1898.12	2532.2	1907.01	2339.85	2294.63	2071.77	1937.17	2222.19	2068.92	1801.47	2758.67	2324.2	1534.87	2072.59	2107	2068	1972.42	2126.91	2162.25	2083.5	2122.88	-0.0532836	0.0931649	-0.571928	0.567371	0.749868	Not DEG	GO:0015031,protein transport|GO:0016197,endosomal transport|GO:0019058,viral life cycle|GO:0019075,virus maturation|GO:0042058,regulation of epidermal growth factor receptor signaling pathway|GO:0043162,ubiquitin-dependent protein catabolic process via the multivesicular body sorting pathway|GO:0048524,positive regulation of viral process|GO:0075733,intracellular transport of virus	GO:0005515,protein binding|GO:0008289,lipid binding|GO:0043130,ubiquitin binding	GO:0000813,ESCRT I complex|GO:0005634,nucleus|GO:0005769,early endosome|GO:0005770,late endosome|GO:0005829,cytosol|GO:0005886,plasma membrane|GO:0010008,endosome membrane|GO:0031902,late endosome membrane|GO:0031982,vesicle|GO:0043657,host cell|GO:0070062,extracellular exosome	path:hsa04144 Endocytosis - Homo sapiens (human)
RNF17	133.975	18.119	24.3779	10.4242	14.0999	28.7513	130.985	33.1189	37.158	29.1315	3.6023	11.4561	1.85021	4.03857	11.0105	44.2231	6.81878	14.068	25.5725	8.763	46.0141	13.1403	29.5772	-1.80686	0.566965	-3.1869	0.00143805	0.0129649	Down	GO:0007275,multicellular organism development|GO:0007286,spermatid development	GO:0042803,protein homodimerization activity|GO:0046872,metal ion binding	GO:0005634,nucleus|GO:0005737,cytoplasm
NBEAL1	11553.1	14775.6	10887.7	8645.97	14797.8	14116.9	15538.4	17215.7	11343.1	13210.2	10862.1	13160.2	9382.43	10459.2	15397.1	15728.7	11860.1	12850.6	8536.77	10150.1	13208.5	11838.7	12523.6	-0.157899	0.136988	-1.15265	0.249054	0.459206	Not DEG
MZT2A	173.092	202.761	163.921	413.492	233.823	191.112	155.992	123.889	197.35	193.907	216.138	292.13	347.84	166.928	138.733	145.445	53.4138	142.845	250.166	353.024	204.934	210.666	207.8	0.0389738	0.281845	0.138281	0.890018	0.946266	Not DEG			GO:0005654,nucleoplasm|GO:0005813,centrosome|GO:0005813,centrosome|GO:0005815,microtubule organizing center|GO:0005819,spindle|GO:0005829,cytosol|GO:0005829,cytosol|GO:0008274,gamma-tubulin ring complex
MZT2B	647.383	729.076	658.204	1035.47	559.296	700.18	520.369	581.42	415.344	759.24	330.211	631.039	501.408	469.82	536.213	455.006	344.348	334.387	341.337	565.839	660.598	450.961	555.779	-0.550792	0.165906	-3.31991	0.000900474	0.00917308	Not DEG		GO:0005515,protein binding	GO:0005654,nucleoplasm|GO:0005813,centrosome|GO:0005815,microtubule organizing center|GO:0005819,spindle|GO:0005829,cytosol|GO:0005829,cytosol|GO:0008274,gamma-tubulin ring complex
CHMP1B	6692.88	7133.73	6983.85	8746.74	9434.01	7637.71	7162.52	7938.71	6130.25	12578.4	13226.5	7838.83	6546.05	8223.88	10580	7192.64	6566.49	6298.16	7919.7	6340.66	8043.88	8073.29	8058.59	0.00525253	0.155918	0.0336878	0.973126	0.987025	Not DEG	GO:0000920,cell separation after cytokinesis|GO:0006997,nucleus organization|GO:0007034,vacuolar transport|GO:0007080,mitotic metaphase plate congression|GO:0010824,regulation of centrosome duplication|GO:0015031,protein transport|GO:0036258,multivesicular body assembly|GO:0039702,viral budding via host ESCRT complex|GO:0039702,viral budding via host ESCRT complex|GO:0045184,establishment of prot…	GO:0005515,protein binding|GO:0019904,protein domain specific binding|GO:0042802,identical protein binding	GO:0000815,ESCRT III complex|GO:0005634,nucleus|GO:0005829,cytosol|GO:0010008,endosome membrane|GO:0030117,membrane coat|GO:0030496,midbody|GO:0031902,late endosome membrane|GO:0070062,extracellular exosome	path:hsa04144 Endocytosis - Homo sapiens (human)
PMM2	1642.9	1472.82	1458.47	1761.68	2584.98	1537.35	1488.47	1819.08	1918.18	1650.48	2223.82	1684.04	1941.8	1830.15	2025.94	1346.35	1625.14	2083.15	1929.06	2007.98	1733.44	1869.74	1801.59	0.109333	0.113735	0.961295	0.336404	0.553003	Not DEG	GO:0006013,mannose metabolic process|GO:0006486,protein glycosylation|GO:0006487,protein N-linked glycosylation|GO:0009298,GDP-mannose biosynthetic process|GO:0009298,GDP-mannose biosynthetic process|GO:0045047,protein targeting to ER	GO:0004615,phosphomannomutase activity|GO:0004615,phosphomannomutase activity|GO:0005515,protein binding	GO:0005634,nucleus|GO:0005829,cytosol|GO:0005829,cytosol|GO:0005829,cytosol|GO:0043025,neuronal cell body|GO:0070062,extracellular exosome	path:hsa00051 Fructose and mannose metabolism - Homo sapiens (human)|path:hsa00520 Amino sugar and nucleotide sugar metabolism - Homo sapiens (human)|path:hsa01100 Metabolic pathways - Homo sapiens (human)
PMM1	310.978	367.558	426.193	508.178	258.498	266.373	288.168	316.469	326.991	375.979	159.702	314.088	357.091	328.47	243.333	283.028	221.61	494.546	262.396	267.897	344.538	293.216	318.877	-0.232466	0.17765	-1.30856	0.190683	0.3856	Not DEG	GO:0006013,mannose metabolic process|GO:0006487,protein N-linked glycosylation|GO:0009298,GDP-mannose biosynthetic process|GO:0009298,GDP-mannose biosynthetic process|GO:0045047,protein targeting to ER|GO:1990830,cellular response to leukemia inhibitory factor	GO:0004615,phosphomannomutase activity|GO:0004615,phosphomannomutase activity|GO:0005515,protein binding|GO:0046872,metal ion binding	GO:0005829,cytosol|GO:0005829,cytosol|GO:0043025,neuronal cell body	path:hsa00051 Fructose and mannose metabolism - Homo sapiens (human)|path:hsa00520 Amino sugar and nucleotide sugar metabolism - Homo sapiens (human)|path:hsa01100 Metabolic pathways - Homo sapiens (human)
ASS1	5571.21	8814.48	7548.75	7483.68	7160.4	6051.31	4318.94	6192	6704.96	8041.21	8651.53	6382.95	11203	8464.17	6392.71	5452.21	3511.67	4955.2	4797.63	7201.93	6788.69	6701.3	6745	-0.0186829	0.180671	-0.103409	0.917639	0.96008	Not DEG	GO:0000050,urea cycle|GO:0000050,urea cycle|GO:0000050,urea cycle|GO:0000052,citrulline metabolic process|GO:0000053,argininosuccinate metabolic process|GO:0006526,arginine biosynthetic process|GO:0006526,arginine biosynthetic process|GO:0006531,aspartate metabolic process|GO:0045429,positive regulation of nitric oxide biosynthetic process|GO:0071499,cellular response to laminar fluid shear stres…	GO:0003723,RNA binding|GO:0004055,argininosuccinate synthase activity|GO:0005515,protein binding|GO:0005524,ATP binding|GO:0016597,amino acid binding|GO:0042802,identical protein binding	GO:0005737,cytoplasm|GO:0005739,mitochondrion|GO:0005829,cytosol|GO:0043209,myelin sheath|GO:0070062,extracellular exosome	path:hsa00220 Arginine biosynthesis - Homo sapiens (human)|path:hsa00250 Alanine, aspartate and glutamate metabolism - Homo sapiens (human)|path:hsa01100 Metabolic pathways - Homo sapiens (human)|path:hsa01230 Biosynthesis of amino acids - Homo sapiens (human)|path:hsa05418 Fluid shear stress and atherosclerosis - Homo sapiens (human)
NCBP1	6297.8	7753.22	7186.44	4291.28	8672.61	8730.26	8419.98	8360.67	7035.26	7788.13	5928.19	6755.27	6174.16	6025.55	8387.82	8956.65	7011.98	5994.07	5750.48	5152.64	7453.57	6613.68	7033.62	-0.1724	0.129277	-1.33357	0.182345	0.375036	Not DEG	GO:0000184,nuclear-transcribed mRNA catabolic process, nonsense-mediated decay|GO:0000184,nuclear-transcribed mRNA catabolic process, nonsense-mediated decay|GO:0000184,nuclear-transcribed mRNA catabolic process, nonsense-mediated decay|GO:0000245,spliceosomal complex assembly|GO:0000398,mRNA splicing, via spliceosome|GO:0006366,transcription from RNA polymerase II promoter|GO:0006368,transcripti…	GO:0000339,RNA cap binding|GO:0000340,RNA 7-methylguanosine cap binding|GO:0003723,RNA binding|GO:0003729,mRNA binding|GO:0005515,protein binding	GO:0005634,nucleus|GO:0005654,nucleoplasm|GO:0005654,nucleoplasm|GO:0005739,mitochondrion|GO:0005829,cytosol|GO:0005829,cytosol|GO:0005845,mRNA cap binding complex|GO:0005846,nuclear cap binding complex|GO:0030529,intracellular ribonucleoprotein complex|GO:0034518,RNA cap binding complex|GO:0034518,RNA cap binding complex	path:hsa03013 RNA transport - Homo sapiens (human)|path:hsa03015 mRNA surveillance pathway - Homo sapiens (human)|path:hsa03040 Spliceosome - Homo sapiens (human)
SPX	2806.63	2994.82	1455.11	1412.47	1354.77	2181.72	3029.33	1554.13	1230.34	2649.15	280.98	2117.47	123.039	382.318	1587.72	2723.16	462.541	45.4506	153.435	166.497	2066.85	804.26	1435.55	-1.3616	0.531507	-2.56178	0.0104138	0.05323	Down	GO:0003084,positive regulation of systemic arterial blood pressure|GO:0010459,negative regulation of heart rate|GO:0010469,regulation of receptor activity|GO:0032099,negative regulation of appetite|GO:0035814,negative regulation of renal sodium excretion|GO:0044539,long-chain fatty acid import|GO:0051930,regulation of sensory perception of pain|GO:1904306,positive regulation of gastro-intestinal …	GO:0005184,neuropeptide hormone activity	GO:0005615,extracellular space|GO:0030133,transport vesicle|GO:0031045,dense core granule
ZNF708	4395.75	4887.83	3479.32	2609.52	4966.69	2344.08	5343.01	4513.98	4783.48	2808.46	1774.73	2496.47	1588.41	2048.23	4555.06	4978.54	3737.83	2692.41	1569.93	3477.66	4013.21	2891.93	3452.57	-0.472716	0.231837	-2.039	0.04145	0.139006	Not DEG	GO:0006351,transcription, DNA-templated|GO:0006355,regulation of transcription, DNA-templated	GO:0003677,DNA binding|GO:0046872,metal ion binding	GO:0005634,nucleus
ZNF879	1049.31	1158.76	907.867	727.954	757.87	1188.11	1038.36	1026.68	896.747	1137.04	833.333	964.22	908.454	943.679	990.948	1172.4	950.083	766.168	833.886	1007.74	988.869	937.092	962.98	-0.0775774	0.104885	-0.739645	0.459515	0.667378	Not DEG	GO:0006351,transcription, DNA-templated|GO:0006355,regulation of transcription, DNA-templated	GO:0003677,DNA binding|GO:0003700,DNA binding transcription factor activity|GO:0046872,metal ion binding	GO:0005634,nucleus
NCBP2	5054.87	5556.51	5832.21	4010.7	6301.48	5322.38	5200.12	5528.4	5338.37	6083.94	5987.03	5299.39	6328.65	6825.19	7264.75	5867.91	5995.98	5925.89	5972.85	6603.55	5422.9	6207.12	5815.01	0.194952	0.0784709	2.48439	0.0129773	0.062343	Not DEG	GO:0000184,nuclear-transcribed mRNA catabolic process, nonsense-mediated decay|GO:0000184,nuclear-transcribed mRNA catabolic process, nonsense-mediated decay|GO:0000184,nuclear-transcribed mRNA catabolic process, nonsense-mediated decay|GO:0000398,mRNA splicing, via spliceosome|GO:0006366,transcription from RNA polymerase II promoter|GO:0006368,transcription elongation from RNA polymerase II prom…	GO:0000339,RNA cap binding|GO:0000340,RNA 7-methylguanosine cap binding|GO:0000340,RNA 7-methylguanosine cap binding|GO:0003723,RNA binding|GO:0003723,RNA binding|GO:0003729,mRNA binding|GO:0005515,protein binding|GO:0017069,snRNA binding	GO:0005634,nucleus|GO:0005634,nucleus|GO:0005654,nucleoplasm|GO:0005654,nucleoplasm|GO:0005737,cytoplasm|GO:0005829,cytosol|GO:0005845,mRNA cap binding complex|GO:0005846,nuclear cap binding complex|GO:0034518,RNA cap binding complex	path:hsa03013 RNA transport - Homo sapiens (human)|path:hsa03015 mRNA surveillance pathway - Homo sapiens (human)|path:hsa03040 Spliceosome - Homo sapiens (human)
NID2	14992.5	15602.2	12105.7	12722.7	18669.4	13641.7	18174.8	15392.9	13319.9	17456.2	12460.4	12434.6	12045.8	10686.7	16422.2	12951.5	18469.8	21003.6	8901.46	11602.2	15207.8	13697.8	14452.8	-0.150857	0.144296	-1.04546	0.295809	0.511198	Not DEG	GO:0007155,cell adhesion|GO:0007160,cell-matrix adhesion|GO:0030198,extracellular matrix organization|GO:0071711,basement membrane organization	GO:0005509,calcium ion binding|GO:0005515,protein binding|GO:0005518,collagen binding	GO:0005576,extracellular region|GO:0005604,basement membrane|GO:0005886,plasma membrane|GO:0031012,extracellular matrix|GO:0031012,extracellular matrix|GO:0031012,extracellular matrix|GO:0070062,extracellular exosome
ZNF703	808.739	540.983	591.795	785.287	585.146	761.065	840.688	747.014	895.096	577.168	1003.84	743.691	506.033	531.745	807.072	952.27	837.574	1366.77	838.334	584.617	713.298	817.194	765.246	0.195772	0.169544	1.1547	0.248213	0.457995	Not DEG	GO:0006351,transcription, DNA-templated|GO:0006355,regulation of transcription, DNA-templated|GO:0008284,positive regulation of cell proliferation|GO:0010718,positive regulation of epithelial to mesenchymal transition|GO:0017015,regulation of transforming growth factor beta receptor signaling pathway|GO:0030335,positive regulation of cell migration|GO:0033601,positive regulation of mammary gland …	GO:0003676,nucleic acid binding|GO:0005515,protein binding|GO:0046872,metal ion binding|GO:0070491,repressing transcription factor binding	GO:0005634,nucleus|GO:0005737,cytoplasm|GO:0005737,cytoplasm|GO:0016363,nuclear matrix|GO:0043234,protein complex
RPL37	5988.78	7659.18	4731.84	7378.57	7081.68	5788.32	5793.13	4175.43	7678.5	5678.83	10939	8066.99	12311.3	12604.4	5468.93	4313.22	5265.24	5349.1	14556.3	10046.2	6195.42	8892.07	7543.74	0.521313	0.21529	2.42144	0.0154591	0.07029	Not DEG	GO:0000184,nuclear-transcribed mRNA catabolic process, nonsense-mediated decay|GO:0006364,rRNA processing|GO:0006412,translation|GO:0006412,translation|GO:0006413,translational initiation|GO:0006614,SRP-dependent cotranslational protein targeting to membrane|GO:0019083,viral transcription	GO:0003723,RNA binding|GO:0003735,structural constituent of ribosome|GO:0003735,structural constituent of ribosome|GO:0019843,rRNA binding|GO:0046872,metal ion binding	GO:0005829,cytosol|GO:0022625,cytosolic large ribosomal subunit|GO:0022625,cytosolic large ribosomal subunit	path:hsa03010 Ribosome - Homo sapiens (human)
COPRS	845.9	1339.08	1527.4	1440.27	730.845	885.372	868.076	904.022	792.705	1089.7	674.832	866.844	1284.97	1004.93	884.145	937.529	571.641	443.685	481.43	887.567	1042.34	803.758	923.048	-0.374827	0.198272	-1.89047	0.0586952	0.176913	Not DEG	GO:0006351,transcription, DNA-templated|GO:0006355,regulation of transcription, DNA-templated|GO:0007517,muscle organ development|GO:0043985,histone H4-R3 methylation	GO:0005515,protein binding|GO:0042393,histone binding	GO:0005634,nucleus|GO:0005654,nucleoplasm|GO:0005829,cytosol|GO:0005886,plasma membrane
ZNF700	2294.2	2266.61	2130.97	1405.52	1992.79	2192.71	2216.03	2547.7	2313.71	2223.1	1876.8	1944.67	2055.59	2005.82	2166.87	2557.08	2499.08	2315.82	2262.61	1896.56	2158.33	2158.09	2158.21	-1.28103e-05	0.0957968	-0.000133724	0.999893	0.999951	Not DEG	GO:0006351,transcription, DNA-templated|GO:0006355,regulation of transcription, DNA-templated	GO:0003677,DNA binding|GO:0046872,metal ion binding	GO:0005634,nucleus
ZNF707	573.061	426.229	532.952	555.087	420.647	491.31	402.482	495.556	430.208	487.043	379.443	465.881	443.126	446.262	433.815	393.094	564.822	641.719	500.332	752.366	481.457	502.086	491.772	0.0589488	0.127508	0.462316	0.643855	0.80097	Not DEG	GO:0006351,transcription, DNA-templated|GO:0006355,regulation of transcription, DNA-templated	GO:0003677,DNA binding|GO:0005515,protein binding|GO:0046872,metal ion binding	GO:0005634,nucleus
ZNF706	2402.75	3308.02	2548.75	2590.4	2720.11	2949.55	2744.74	3051.84	2596.11	2513.5	3055.95	3087.41	3087.08	3243.65	3034.5	2830.28	2457.03	2420.79	2493.88	2055.55	2742.58	2776.61	2759.59	0.0182306	0.090319	0.201847	0.840037	0.921334	Not DEG	GO:0006417,regulation of translation|GO:0045892,negative regulation of transcription, DNA-templated|GO:1902455,negative regulation of stem cell population maintenance	GO:0046872,metal ion binding	GO:0005634,nucleus|GO:0005737,cytoplasm
ZNF704	12661.1	17320.1	12516	13918	13789.7	17661.8	16076.7	20341.1	11108.6	13779.2	12729.3	14976.9	5932.71	8384.07	14745.3	19859.1	13469.4	12339.8	7271.49	6586.02	14917.2	11629.4	13273.3	-0.359191	0.20028	-1.79344	0.0729025	0.204741	Not DEG	GO:0006357,regulation of transcription from RNA polymerase II promoter	GO:0001158,enhancer sequence-specific DNA binding|GO:0046872,metal ion binding	GO:0005634,nucleus
ZC3H10	734.417	979.291	861.633	909.508	938.818	754.3	820.445	731.068	890.142	937.671	577.569	674	866.825	722.231	654.025	741.965	745.52	718.553	757.169	585.869	855.729	704.373	780.051	-0.280215	0.0859181	-3.26142	0.00110854	0.0107432	Not DEG	GO:0010608,posttranscriptional regulation of gene expression|GO:1903799,negative regulation of production of miRNAs involved in gene silencing by miRNA	GO:0003723,RNA binding|GO:0005515,protein binding|GO:0035198,miRNA binding|GO:0046872,metal ion binding	GO:0005634,nucleus
ZC3H13	16771.3	16197.6	9983.18	16812.4	23043.9	13835.3	18426.1	12132.5	16980.4	14379.1	19629	18233.3	16881.3	15693.2	16809.8	13437.9	17445.9	12099.6	18564.5	19246	15856.2	16804.1	16330.1	0.083772	0.132162	0.633857	0.526174	0.71837	Not DEG		GO:0003723,RNA binding|GO:0005515,protein binding|GO:0046872,metal ion binding	GO:0005654,nucleoplasm|GO:0016607,nuclear speck
RNF115	3059.91	3315.78	2669.8	2642.53	4222.92	2941.94	3458.01	3072.69	3678.65	2900.41	5048.03	3391.96	3928.93	3805.01	3721.56	2655.35	4453.8	3613.32	3485.65	3356.23	3196.26	3745.98	3471.12	0.229036	0.111967	2.04557	0.0407986	0.137427	Not DEG	GO:0000209,protein polyubiquitination|GO:0000209,protein polyubiquitination|GO:0042059,negative regulation of epidermal growth factor receptor signaling pathway|GO:0042787,protein ubiquitination involved in ubiquitin-dependent protein catabolic process|GO:0043161,proteasome-mediated ubiquitin-dependent protein catabolic process|GO:0043162,ubiquitin-dependent protein catabolic process via the mult…	GO:0004842,ubiquitin-protein transferase activity|GO:0004842,ubiquitin-protein transferase activity|GO:0004842,ubiquitin-protein transferase activity|GO:0005515,protein binding|GO:0046872,metal ion binding|GO:0061630,ubiquitin protein ligase activity|GO:0061630,ubiquitin protein ligase activity	GO:0005829,cytosol|GO:0005829,cytosol|GO:0005829,cytosol
ZC3H15	5009.88	5648.83	4357.76	5119.13	7020.58	5111.82	4860.75	3998.79	5387.92	5153.55	6517.77	5446.41	5809.67	6074.68	6551.26	4824.25	5310.69	3910.92	5520.33	5410.53	5166.9	5537.65	5352.28	0.0999983	0.105248	0.950116	0.342053	0.559112	Not DEG	GO:0019221,cytokine-mediated signaling pathway	GO:0003723,RNA binding|GO:0005515,protein binding|GO:0045296,cadherin binding|GO:0046872,metal ion binding	GO:0005730,nucleolus|GO:0005829,cytosol
ZC3H14	10334.7	11717.8	9095.49	8772.8	9914.58	10457	11212.3	9294.13	8609.93	11229.3	10970.2	10082.3	11801.6	12622.6	10380.7	10782.6	10048.6	7852.14	8908.13	10743.4	10063.8	10419.2	10241.5	0.0501631	0.0877278	0.571803	0.567455	0.749868	Not DEG	GO:0043488,regulation of mRNA stability|GO:1900364,negative regulation of mRNA polyadenylation	GO:0003723,RNA binding|GO:0005515,protein binding|GO:0008143,poly(A) binding|GO:0046872,metal ion binding	GO:0005634,nucleus|GO:0005730,nucleolus|GO:0005737,cytoplasm|GO:0016607,nuclear speck
SPN	914.355	122.519	1112.14	502.966	552.246	442.263	323.891	192.58	1548.25	240.335	686.839	884.028	846.472	624.632	666.137	530.677	381.852	858.151	2183.67	1025.27	595.154	868.773	731.964	0.54533	0.388375	1.40413	0.160279	0.344068	Not DEG	GO:0001562,response to protozoan|GO:0001808,negative regulation of type IV hypersensitivity|GO:0001934,positive regulation of protein phosphorylation|GO:0006935,chemotaxis|GO:0006955,immune response|GO:0006968,cellular defense response|GO:0007162,negative regulation of cell adhesion|GO:0007163,establishment or maintenance of cell polarity|GO:0007165,signal transduction|GO:0007166,cell surface rec…	GO:0004888,transmembrane signaling receptor activity|GO:0030544,Hsp70 protein binding|GO:0031072,heat shock protein binding	GO:0001931,uropod|GO:0005604,basement membrane|GO:0005615,extracellular space|GO:0005886,plasma membrane|GO:0005887,integral component of plasma membrane|GO:0009897,external side of plasma membrane|GO:0009986,cell surface|GO:0016020,membrane|GO:0070062,extracellular exosome	path:hsa04514 Cell adhesion molecules (CAMs) - Homo sapiens (human)|path:hsa05169 Epstein-Barr virus infection - Homo sapiens (human)
HMGCLL1	112.461	81.9671	112.643	11.2928	92.8243	90.4822	119.078	100.583	60.2786	47.3387	34.8223	55.3711	35.154	23.5583	107.903	200.478	105.691	85.4904	48.9213	17.526	82.8948	71.4916	77.1932	-0.21259	0.419057	-0.507307	0.61194	0.779396	Not DEG	GO:0046951,ketone body biosynthetic process|GO:0046951,ketone body biosynthetic process	GO:0004419,hydroxymethylglutaryl-CoA lyase activity|GO:0004419,hydroxymethylglutaryl-CoA lyase activity|GO:0004419,hydroxymethylglutaryl-CoA lyase activity|GO:0046872,metal ion binding|GO:0046872,metal ion binding	GO:0005783,endoplasmic reticulum|GO:0005789,endoplasmic reticulum membrane|GO:0005829,cytosol|GO:0005829,cytosol|GO:0016020,membrane|GO:0048471,perinuclear region of cytoplasm	path:hsa00072 Synthesis and degradation of ketone bodies - Homo sapiens (human)|path:hsa00280 Valine, leucine and isoleucine degradation - Homo sapiens (human)|path:hsa00650 Butanoate metabolism - Homo sapiens (human)|path:hsa01100 Metabolic pathways - Homo sapiens (human)|path:hsa04146 Peroxisome - Homo sapiens (human)
LRRTM1	9.77919	78.5158	47.9152	19.9796	12.9249	40.5901	391.765	24.5325	9.90881	12.745	0	20.0481	0	0	25.3242	67.8087	173.879	5.41079	76.7175	6.25929	64.8657	37.5448	51.2052	-0.788626	0.941845	-0.83732	0.402413	0.615337	Not DEG	GO:0002091,negative regulation of receptor internalization|GO:0006469,negative regulation of protein kinase activity|GO:0007626,locomotory behavior|GO:0008150,biological_process|GO:0019221,cytokine-mediated signaling pathway|GO:0035418,protein localization to synapse|GO:0035640,exploration behavior|GO:0046426,negative regulation of JAK-STAT cascade|GO:0050808,synapse organization|GO:0051965,posit…	GO:0003674,molecular_function|GO:0004860,protein kinase inhibitor activity	GO:0005783,endoplasmic reticulum|GO:0009986,cell surface|GO:0016021,integral component of membrane|GO:0030054,cell junction|GO:0030424,axon|GO:0030426,growth cone|GO:0045211,postsynaptic membrane|GO:0060076,excitatory synapse
GRIN1	0	6.03968	12.6093	0	0	7.61065	0	0	6.60587	1.82072	0	1.90935	8.32596	6.05786	0	6.87915	32.9574	0	2.2237	0	3.46862	5.83534	4.65198	0.737963	1.2735	0.579476	0.562268	0.74596	Not DEG	GO:0000165,MAPK cascade|GO:0001661,conditioned taste aversion|GO:0001967,suckling behavior|GO:0001975,response to amphetamine|GO:0006812,cation transport|GO:0007585,respiratory gaseous exchange|GO:0007616,long-term memory|GO:0008344,adult locomotory behavior|GO:0008355,olfactory learning|GO:0008542,visual learning|GO:0010524,positive regulation of calcium ion transport into cytosol|GO:0018964,pro…	GO:0004972,NMDA glutamate receptor activity|GO:0004972,NMDA glutamate receptor activity|GO:0004972,NMDA glutamate receptor activity|GO:0005088,Ras guanyl-nucleotide exchange factor activity|GO:0005102,receptor binding|GO:0005234,extracellularly glutamate-gated ion channel activity|GO:0005262,calcium channel activity|GO:0005509,calcium ion binding|GO:0005515,protein binding|GO:0005516,calmodulin b…	GO:0005783,endoplasmic reticulum|GO:0005886,plasma membrane|GO:0005887,integral component of plasma membrane|GO:0008021,synaptic vesicle|GO:0009986,cell surface|GO:0014069,postsynaptic density|GO:0017146,NMDA selective glutamate receptor complex|GO:0030054,cell junction|GO:0030425,dendrite|GO:0043005,neuron projection|GO:0043083,synaptic cleft|GO:0043195,terminal bouton|GO:0043197,dendritic spine…	path:hsa04014 Ras signaling pathway - Homo sapiens (human)|path:hsa04015 Rap1 signaling pathway - Homo sapiens (human)|path:hsa04020 Calcium signaling pathway - Homo sapiens (human)|path:hsa04024 cAMP signaling pathway - Homo sapiens (human)|path:hsa04080 Neuroactive ligand-receptor interaction - Homo sapiens (human)|path:hsa04713 Circadian entrainment - Homo sapiens (human)|path:hsa04720 Long-te…
FOXQ1	164.29	355.478	151.311	149.413	626.271	158.132	240.537	366.761	104.043	507.981	5152.49	968.994	2766.99	3976.65	508.686	74.6879	971.676	3422.86	1951.29	2677.72	282.422	2247.21	1264.81	2.99266	0.475252	6.29699	3.03486e-10	4.57287e-08	Up	GO:0000122,negative regulation of transcription from RNA polymerase II promoter|GO:0006351,transcription, DNA-templated|GO:0009653,anatomical structure morphogenesis|GO:0030154,cell differentiation|GO:0031069,hair follicle morphogenesis	GO:0000978,RNA polymerase II proximal promoter sequence-specific DNA binding|GO:0000981,RNA polymerase II transcription factor activity, sequence-specific DNA binding|GO:0001078,transcriptional repressor activity, RNA polymerase II proximal promoter sequence-specific DNA binding	GO:0005634,nucleus
DHX9	16439.8	18440	18649.1	17321.5	16099.7	16581.9	13661.8	15224.9	18980.3	20160.8	14081.4	14624.6	16058	15161.5	17272.2	16314.4	13402.3	11730.6	15753.8	13911.9	17156	14831.1	15993.5	-0.210128	0.0822806	-2.55379	0.0106557	0.0541788	Not DEG	GO:0000380,alternative mRNA splicing, via spliceosome|GO:0000398,mRNA splicing, via spliceosome|GO:0001649,osteoblast differentiation|GO:0006260,DNA replication|GO:0006353,DNA-templated transcription, termination|GO:0006357,regulation of transcription from RNA polymerase II promoter|GO:0006396,RNA processing|GO:0006954,inflammatory response|GO:0010501,RNA secondary structure unwinding|GO:0030423,…	GO:0000993,RNA polymerase II core binding|GO:0001047,core promoter binding|GO:0001069,regulatory region RNA binding|GO:0001085,RNA polymerase II transcription factor binding|GO:0001104,RNA polymerase II transcription cofactor activity|GO:0001105,RNA polymerase II transcription coactivator activity|GO:0003677,DNA binding|GO:0003688,DNA replication origin binding|GO:0003690,double-stranded DNA bind…	GO:0005634,nucleus|GO:0005654,nucleoplasm|GO:0005654,nucleoplasm|GO:0005726,perichromatin fibrils|GO:0005730,nucleolus|GO:0005737,cytoplasm|GO:0005813,centrosome|GO:0005829,cytosol|GO:0005844,polysome|GO:0015629,actin cytoskeleton|GO:0016020,membrane|GO:0016604,nuclear body|GO:0030529,intracellular ribonucleoprotein complex|GO:0030529,intracellular ribonucleoprotein complex|GO:0035068,micro-ribon…
FAM162A	813.629	1450.39	1350.03	1283.04	1068.07	1099.32	890.701	1171.43	1032.99	1194.39	1240.39	1318.4	1546.78	1115.32	837.901	1100.66	983.041	732.621	1435.4	1792.66	1135.4	1210.32	1172.86	0.0918265	0.154868	0.592932	0.553226	0.738656	Not DEG	GO:0006919,activation of cysteine-type endopeptidase activity involved in apoptotic process|GO:0043065,positive regulation of apoptotic process|GO:0051402,neuron apoptotic process|GO:0071456,cellular response to hypoxia|GO:0090200,positive regulation of release of cytochrome c from mitochondria	GO:0005515,protein binding	GO:0005739,mitochondrion|GO:0005829,cytosol|GO:0016021,integral component of membrane|GO:0070062,extracellular exosome
TCOF1	3063.82	2167.38	2647.95	3424.34	3131.35	2640.05	1988.6	2304.83	3482.12	2406.99	2642.89	2516.52	3512.63	2976.43	2421.22	1941.88	2499.08	3044.11	3306.64	3614.11	2725.74	2847.55	2786.65	0.0629195	0.131461	0.478618	0.63221	0.793146	Not DEG	GO:0001501,skeletal system development|GO:0006417,regulation of translation|GO:0006810,transport|GO:0014029,neural crest formation|GO:0014032,neural crest cell development	GO:0001042,RNA polymerase I core binding|GO:0003723,RNA binding|GO:0005215,transporter activity|GO:0005515,protein binding|GO:0046982,protein heterodimerization activity|GO:0097110,scaffold protein binding	GO:0001650,fibrillar center|GO:0005634,nucleus|GO:0005730,nucleolus|GO:0005829,cytosol	path:hsa03008 Ribosome biogenesis in eukaryotes - Homo sapiens (human)
NSRP1	4544.39	4407.24	1823.3	4680.45	6625.78	4172.33	4750.01	2426.26	4480.43	2879.47	6715.89	5921.84	5241.65	3836.64	4015.54	3383.56	5418.66	4593.76	5824.97	6109.06	4078.97	5106.16	4592.56	0.32402	0.195025	1.66143	0.0966278	0.246666	Not DEG	GO:0000381,regulation of alternative mRNA splicing, via spliceosome|GO:0006397,mRNA processing|GO:0006913,nucleocytoplasmic transport|GO:0008380,RNA splicing|GO:0032502,developmental process	GO:0003723,RNA binding|GO:0003729,mRNA binding|GO:0005515,protein binding	GO:0005634,nucleus|GO:0005654,nucleoplasm|GO:0016607,nuclear speck|GO:0030529,intracellular ribonucleoprotein complex
NUP98	15923.5	16009.5	14157.7	16120.1	16203.1	13541.9	13173.6	15259.2	15628.7	14808.8	15198.1	13975.5	14058.8	16179.9	16904.5	13047.8	13312.5	12932.9	14170.5	13199.6	15082.6	14298	14690.3	-0.0770308	0.0641401	-1.20098	0.22976	0.435169	Not DEG	GO:0000973,posttranscriptional tethering of RNA polymerase II gene DNA at nuclear periphery|GO:0006110,regulation of glycolytic process|GO:0006260,DNA replication|GO:0006405,RNA export from nucleus|GO:0006406,mRNA export from nucleus|GO:0006409,tRNA export from nucleus|GO:0006508,proteolysis|GO:0006606,protein import into nucleus|GO:0006913,nucleocytoplasmic transport|GO:0006999,nuclear pore orga…	GO:0001105,RNA polymerase II transcription coactivator activity|GO:0003723,RNA binding|GO:0003729,mRNA binding|GO:0005215,transporter activity|GO:0005487,nucleocytoplasmic transporter activity|GO:0005515,protein binding|GO:0008139,nuclear localization sequence binding|GO:0008236,serine-type peptidase activity|GO:0017056,structural constituent of nuclear pore|GO:0017056,structural constituent of n…	GO:0000776,kinetochore|GO:0005635,nuclear envelope|GO:0005635,nuclear envelope|GO:0005643,nuclear pore|GO:0005643,nuclear pore|GO:0005654,nucleoplasm|GO:0005654,nucleoplasm|GO:0005829,cytosol|GO:0016604,nuclear body|GO:0030529,intracellular ribonucleoprotein complex|GO:0031080,nuclear pore outer ring|GO:0031080,nuclear pore outer ring|GO:0031965,nuclear membrane|GO:0034399,nuclear periphery|GO:00…	path:hsa03013 RNA transport - Homo sapiens (human)|path:hsa05164 Influenza A - Homo sapiens (human)
XPC	6016.16	5088.86	6039	6856.49	6695.1	4024.34	4677.37	6163.79	5960.98	5386.6	5688.04	6437.36	7085.39	6940.96	5793.74	5483.66	4689.05	7972.25	7320.41	7499.88	5690.87	6491.07	6090.97	0.189856	0.113859	1.66746	0.0954229	0.24477	Not DEG	GO:0000715,nucleotide-excision repair, DNA damage recognition|GO:0000715,nucleotide-excision repair, DNA damage recognition|GO:0000717,nucleotide-excision repair, DNA duplex unwinding|GO:0006281,DNA repair|GO:0006289,nucleotide-excision repair|GO:0006294,nucleotide-excision repair, preincision complex assembly|GO:0006298,mismatch repair|GO:0010224,response to UV-B|GO:0010996,response to auditory …	GO:0000404,heteroduplex DNA loop binding|GO:0000405,bubble DNA binding|GO:0003684,damaged DNA binding|GO:0003697,single-stranded DNA binding|GO:0005515,protein binding	GO:0000111,nucleotide-excision repair factor 2 complex|GO:0005634,nucleus|GO:0005654,nucleoplasm|GO:0005730,nucleolus|GO:0005737,cytoplasm|GO:0005739,mitochondrion|GO:0005886,plasma membrane|GO:0043231,intracellular membrane-bounded organelle|GO:0070062,extracellular exosome|GO:0071942,XPC complex	path:hsa03420 Nucleotide excision repair - Homo sapiens (human)
SP1	15855	15211.4	13808.8	12781.8	14880.1	14124.5	13749.9	13306.4	13868.2	13305.8	15196.9	15677.7	16046.9	17691	14122.1	14663.4	13227.3	15429.4	15478	13282.2	14089.2	15081.5	14585.3	0.0983134	0.0599196	1.64076	0.100848	0.253923	Not DEG	GO:0006355,regulation of transcription, DNA-templated|GO:0016032,viral process|GO:0032869,cellular response to insulin stimulus|GO:0042795,snRNA transcription from RNA polymerase II promoter|GO:0043923,positive regulation by host of viral transcription|GO:0045540,regulation of cholesterol biosynthetic process|GO:0045893,positive regulation of transcription, DNA-templated|GO:0045944,positive regul…	GO:0000977,RNA polymerase II regulatory region sequence-specific DNA binding|GO:0000978,RNA polymerase II proximal promoter sequence-specific DNA binding|GO:0000978,RNA polymerase II proximal promoter sequence-specific DNA binding|GO:0000982,transcription factor activity, RNA polymerase II proximal promoter sequence-specific DNA binding|GO:0001046,core promoter sequence-specific DNA binding|GO:00…	GO:0000790,nuclear chromatin|GO:0005634,nucleus|GO:0005654,nucleoplasm|GO:0005654,nucleoplasm|GO:0005737,cytoplasm|GO:0017053,transcriptional repressor complex|GO:0032993,protein-DNA complex	path:hsa01522 Endocrine resistance - Homo sapiens (human)|path:hsa04137 Mitophagy - animal - Homo sapiens (human)|path:hsa04350 TGF-beta signaling pathway - Homo sapiens (human)|path:hsa04915 Estrogen signaling pathway - Homo sapiens (human)|path:hsa05016 Huntington's disease - Homo sapiens (human)|path:hsa05202 Transcriptional misregulation in cancer - Homo sapiens (human)|path:hsa05224 Breast c…
GRINA	4819.19	4254.52	4002.18	4407.68	4034.92	3470.46	4126.04	2964.75	4218.68	5586.88	5150.09	3806.28	6366.58	6141.99	3651.09	2986.53	4633.36	3995.33	4638.63	6430.79	4188.53	4780.07	4484.3	0.190557	0.14653	1.30046	0.193442	0.389084	Not DEG	GO:0032469,endoplasmic reticulum calcium ion homeostasis|GO:1902236,negative regulation of endoplasmic reticulum stress-induced intrinsic apoptotic signaling pathway	GO:0044325,ion channel binding	GO:0005783,endoplasmic reticulum|GO:0005794,Golgi apparatus|GO:0016021,integral component of membrane
SP3	11393.7	15345.1	11047.4	9043.83	9457.51	13385.4	9869.15	12675.9	9597.51	11482.4	9602.54	10968.2	7925.39	9964.5	14670.4	15997	12030.6	10390.9	9978.84	11094	11329.8	11262.2	11296	-0.00865697	0.130044	-0.0665696	0.946924	0.973492	Not DEG	GO:0000122,negative regulation of transcription from RNA polymerase II promoter|GO:0001503,ossification|GO:0001779,natural killer cell differentiation|GO:0001829,trophectodermal cell differentiation|GO:0001889,liver development|GO:0001892,embryonic placenta development|GO:0006351,transcription, DNA-templated|GO:0006355,regulation of transcription, DNA-templated|GO:0016925,protein sumoylation|GO:0…	GO:0000977,RNA polymerase II regulatory region sequence-specific DNA binding|GO:0000979,RNA polymerase II core promoter sequence-specific DNA binding|GO:0000981,RNA polymerase II transcription factor activity, sequence-specific DNA binding|GO:0000987,proximal promoter sequence-specific DNA binding|GO:0001078,transcriptional repressor activity, RNA polymerase II proximal promoter sequence-specific…	GO:0005634,nucleus|GO:0005634,nucleus|GO:0005654,nucleoplasm|GO:0016605,PML body|GO:0017053,transcriptional repressor complex
NUP93	4661.74	7906.8	9084.56	7443.72	5299.21	5269.95	4604.73	5984.7	4545.67	4236.82	4158.26	4890.79	2459.86	3328.46	5129.81	4552.03	1808.11	2189.2	2158.1	2043.03	5903.79	3271.76	4587.78	-0.851553	0.218327	-3.90036	9.60495e-05	0.00160342	Not DEG	GO:0006110,regulation of glycolytic process|GO:0006406,mRNA export from nucleus|GO:0006409,tRNA export from nucleus|GO:0006998,nuclear envelope organization|GO:0007077,mitotic nuclear envelope disassembly|GO:0016032,viral process|GO:0016925,protein sumoylation|GO:0016973,poly(A)+ mRNA export from nucleus|GO:0019083,viral transcription|GO:0051292,nuclear pore complex assembly|GO:0051292,nuclear po…	GO:0005515,protein binding|GO:0017056,structural constituent of nuclear pore	GO:0005635,nuclear envelope|GO:0005635,nuclear envelope|GO:0005643,nuclear pore|GO:0016020,membrane|GO:0031965,nuclear membrane|GO:0034399,nuclear periphery|GO:0043657,host cell	path:hsa03013 RNA transport - Homo sapiens (human)
SP5	11.735	0	0	0	0	10.1475	0	9.81299	0	4.5518	3.6023	7.63739	14.8017	10.7695	0	7.86188	9.09171	4.32863	4.44739	0	3.62474	6.25405	4.93939	0.797114	1.09165	0.730191	0.465273	0.671354	Not DEG	GO:0000122,negative regulation of transcription from RNA polymerase II promoter|GO:0006351,transcription, DNA-templated|GO:0006357,regulation of transcription from RNA polymerase II promoter|GO:0036342,post-anal tail morphogenesis|GO:0060349,bone morphogenesis|GO:0071407,cellular response to organic cyclic compound	GO:0000977,RNA polymerase II regulatory region sequence-specific DNA binding|GO:0000981,RNA polymerase II transcription factor activity, sequence-specific DNA binding|GO:0046872,metal ion binding	GO:0005634,nucleus
SP6	211.231	101.812	90.7867	279.715	296.098	87.0997	122.65	204.846	2.4772	272.198	130.884	105.969	31.4536	55.1938	243.333	31.4475	253.431	189.378	503.667	150.223	166.891	169.498	168.195	0.0220834	0.528734	0.0417666	0.966685	0.984005	Not DEG	GO:0006351,transcription, DNA-templated|GO:0006357,regulation of transcription from RNA polymerase II promoter|GO:0008284,positive regulation of cell proliferation|GO:0042481,regulation of odontogenesis	GO:0000981,RNA polymerase II transcription factor activity, sequence-specific DNA binding|GO:0003677,DNA binding|GO:0046872,metal ion binding	GO:0005634,nucleus|GO:0005829,cytosol
SP7	43.0285	53.4943	41.1903	46.0401	32.8998	51.5833	41.6772	67.4643	28.075	41.8766	15.61	55.3711	11.1013	51.1552	34.1326	43.2403	0	25.9718	22.237	0	44.7329	25.8819	35.3074	-0.781996	0.509759	-1.53405	0.125017	0.292545	Not DEG	GO:0001649,osteoblast differentiation|GO:0001649,osteoblast differentiation|GO:0006357,regulation of transcription from RNA polymerase II promoter|GO:0006366,transcription from RNA polymerase II promoter|GO:0045944,positive regulation of transcription from RNA polymerase II promoter|GO:0060218,hematopoietic stem cell differentiation|GO:2000738,positive regulation of stem cell differentiation	GO:0000978,RNA polymerase II proximal promoter sequence-specific DNA binding|GO:0000981,RNA polymerase II transcription factor activity, sequence-specific DNA binding|GO:0001077,transcriptional activator activity, RNA polymerase II proximal promoter sequence-specific DNA binding|GO:0003677,DNA binding|GO:0017151,DEAD/H-box RNA helicase binding|GO:0046872,metal ion binding	GO:0005634,nucleus|GO:0005737,cytoplasm
OR5B3	0	0	0	0	4.69997	0	0	0	1.65147	0	0	0	0	0	0	0	0	0	3.33555	0	0.635144	0.333555	0.484349	-0.866673	3.01018	-0.287914	0.773413	NA	Not DEG	GO:0007186,G-protein coupled receptor signaling pathway|GO:0007186,G-protein coupled receptor signaling pathway|GO:0050911,detection of chemical stimulus involved in sensory perception of smell	GO:0004930,G-protein coupled receptor activity|GO:0004984,olfactory receptor activity|GO:0005549,odorant binding	GO:0005886,plasma membrane|GO:0016021,integral component of membrane	path:hsa04740 Olfactory transduction - Homo sapiens (human)
GOLIM4	3380.67	4169.1	3317.08	4498.03	6401.35	4861.51	5258.47	3731.39	5005.6	4065.67	7653.69	5975.3	5358.22	5238.03	4882.07	4902.87	5357.29	6042.77	9290.61	6533.44	4468.89	6123.43	5296.16	0.454419	0.142071	3.19854	0.00138123	0.012577	Not DEG	GO:0006810,transport		GO:0000139,Golgi membrane|GO:0005794,Golgi apparatus|GO:0005796,Golgi lumen|GO:0005801,cis-Golgi network|GO:0010008,endosome membrane|GO:0016020,membrane|GO:0016021,integral component of membrane|GO:0030133,transport vesicle|GO:0030139,endocytic vesicle|GO:0032580,Golgi cisterna membrane
OPA3	2732.31	2301.12	2485.71	3602.42	2722.46	2342.39	2326.78	2797.93	2615.1	2768.4	2409.94	2211.98	3309.11	2702.48	2557.75	2049.99	2819.57	2716.22	3139.86	2635.16	2669.46	2655.2	2662.33	-0.00772845	0.0998986	-0.077363	0.938335	0.970077	Not DEG	GO:0007601,visual perception|GO:0019216,regulation of lipid metabolic process|GO:0040007,growth|GO:0050896,response to stimulus|GO:0050905,neuromuscular process|GO:0070584,mitochondrion morphogenesis		GO:0005739,mitochondrion|GO:0005739,mitochondrion|GO:0005739,mitochondrion
PRR27	0	0	0	0	10.5749	4.22814	0	14.7195	0	0	6.00384	0	0	0	0	0	0	0	0	0	2.95226	0.600384	1.77632	-2.34827	2.75026	-0.853836	0.393196	NA	Not DEG			GO:0070062,extracellular exosome
OPA1	8117.71	8656.59	7643.74	6401.3	8450.54	8823.28	8185.39	8835.37	8597.55	8212.36	9821.08	7788.23	8215.87	8044.83	9189.39	9412.64	8225.72	6354.43	8279.94	7726.46	8192.38	8305.86	8249.12	0.0198625	0.0792259	0.250707	0.802041	0.899939	Not DEG	GO:0000002,mitochondrial genome maintenance|GO:0000266,mitochondrial fission|GO:0003374,dynamin family protein polymerization involved in mitochondrial fission|GO:0006915,apoptotic process|GO:0007005,mitochondrion organization|GO:0007005,mitochondrion organization|GO:0007007,inner mitochondrial membrane organization|GO:0007601,visual perception|GO:0008053,mitochondrial fusion|GO:0008053,mitochond…	GO:0000287,magnesium ion binding|GO:0003924,GTPase activity|GO:0003924,GTPase activity|GO:0005515,protein binding|GO:0005525,GTP binding|GO:0008017,microtubule binding|GO:0019900,kinase binding|GO:0070300,phosphatidic acid binding|GO:1901612,cardiolipin binding	GO:0005654,nucleoplasm|GO:0005739,mitochondrion|GO:0005741,mitochondrial outer membrane|GO:0005743,mitochondrial inner membrane|GO:0005743,mitochondrial inner membrane|GO:0005743,mitochondrial inner membrane|GO:0005758,mitochondrial intermembrane space|GO:0005758,mitochondrial intermembrane space|GO:0005829,cytosol|GO:0016020,membrane|GO:0016021,integral component of membrane|GO:0030061,mitochond…
RAB40C	659.118	694.563	719.569	820.034	722.62	621.536	528.705	675.87	566.454	644.535	434.678	624.357	676.253	588.285	491.07	590.624	350.031	781.318	647.096	510.758	665.3	569.447	617.374	-0.223828	0.128566	-1.74096	0.08169	0.221003	Not DEG	GO:0006904,vesicle docking involved in exocytosis|GO:0009306,protein secretion|GO:0016567,protein ubiquitination|GO:0017157,regulation of exocytosis|GO:0035556,intracellular signal transduction|GO:0072659,protein localization to plasma membrane	GO:0003924,GTPase activity|GO:0005525,GTP binding|GO:0019003,GDP binding	GO:0005768,endosome|GO:0005886,plasma membrane|GO:0008021,synaptic vesicle|GO:0030667,secretory granule membrane|GO:0048471,perinuclear region of cytoplasm
RAB40B	383.344	368.42	330.363	268.422	348.973	361.083	434.633	408.466	280.75	449.718	543.948	407.646	312.686	286.065	398.581	428.473	481.86	339.797	340.226	266.646	363.417	380.593	372.005	0.0666756	0.141108	0.472515	0.636559	0.795783	Not DEG	GO:0006904,vesicle docking involved in exocytosis|GO:0009306,protein secretion|GO:0016567,protein ubiquitination|GO:0017157,regulation of exocytosis|GO:0035556,intracellular signal transduction|GO:0072659,protein localization to plasma membrane|GO:1990967,multi-organism toxin transport	GO:0003924,GTPase activity|GO:0005525,GTP binding	GO:0005635,nuclear envelope|GO:0005768,endosome|GO:0005886,plasma membrane|GO:0008021,synaptic vesicle|GO:0030667,secretory granule membrane|GO:0048471,perinuclear region of cytoplasm
RAB40A	74.3219	75.0646	51.2777	95.5548	97.5243	84.5628	161.946	175.407	56.9757	109.243	97.2622	98.3314	82.3345	50.4821	86.9832	193.599	131.83	157.995	67.8228	155.23	98.1878	112.187	105.187	0.194556	0.272619	0.713655	0.47544	0.678954	Not DEG	GO:0006904,vesicle docking involved in exocytosis|GO:0009306,protein secretion|GO:0016567,protein ubiquitination|GO:0017157,regulation of exocytosis|GO:0035556,intracellular signal transduction|GO:0072659,protein localization to plasma membrane	GO:0003924,GTPase activity|GO:0005525,GTP binding	GO:0005768,endosome|GO:0005886,plasma membrane|GO:0008021,synaptic vesicle|GO:0030667,secretory granule membrane
FAM162B	178.959	96.6349	154.674	80.7873	130.424	169.126	235.774	229.379	113.126	145.658	78.0499	120.289	91.5855	82.1176	125.52	239.787	270.478	136.352	154.547	56.3336	153.454	135.506	144.48	-0.178127	0.278886	-0.638708	0.523013	0.716163	Not DEG			GO:0016021,integral component of membrane
COL7A1	110.505	45.729	111.802	166.787	76.3745	104.858	108.361	103.036	199.002	106.512	380.643	174.705	174.845	297.508	258.747	129.721	560.276	1478.23	2331.55	2038.02	113.297	782.424	447.86	2.78715	0.473372	5.88786	3.9122e-09	3.89601e-07	Up	GO:0006888,ER to Golgi vesicle-mediated transport|GO:0007155,cell adhesion|GO:0008544,epidermis development|GO:0010951,negative regulation of endopeptidase activity|GO:0030198,extracellular matrix organization|GO:0030574,collagen catabolic process|GO:0035987,endodermal cell differentiation|GO:0048208,COPII vesicle coating	GO:0004867,serine-type endopeptidase inhibitor activity|GO:0005515,protein binding|GO:0042802,identical protein binding	GO:0000139,Golgi membrane|GO:0005576,extracellular region|GO:0005590,collagen type VII trimer|GO:0005604,basement membrane|GO:0005615,extracellular space|GO:0005788,endoplasmic reticulum lumen|GO:0030134,COPII-coated ER to Golgi transport vesicle|GO:0031012,extracellular matrix|GO:0033116,endoplasmic reticulum-Golgi intermediate compartment membrane	path:hsa04974 Protein digestion and absorption - Homo sapiens (human)
FAM187B	4.8896	0	20.1748	0	0	0	0	9.81299	0	0	3.6023	3.81869	0	0	0	0	7.95524	0	4.44739	7.51114	3.48774	2.73348	3.11061	-0.359835	1.69957	-0.211722	0.832324	NA	Not DEG			GO:0016021,integral component of membrane
GTSE1	95.8361	31.924	109.28	33.8785	32.8998	77.7978	26.1971	12.2662	245.243	16.3865	69.6445	38.1869	24.0528	74.7136	62.76	27.5166	48.8679	51.9436	87.836	67.6003	68.1709	55.3122	61.7416	-0.305388	0.456698	-0.668686	0.503696	0.701442	Not DEG	GO:0006977,DNA damage response, signal transduction by p53 class mediator resulting in cell cycle arrest|GO:0007017,microtubule-based process|GO:0030335,positive regulation of cell migration|GO:0043161,proteasome-mediated ubiquitin-dependent protein catabolic process|GO:0046827,positive regulation of protein export from nucleus|GO:0050821,protein stabilization|GO:1900182,positive regulation of pr…	GO:0003674,molecular_function|GO:0005515,protein binding	GO:0005654,nucleoplasm|GO:0005829,cytosol|GO:0005881,cytoplasmic microtubule|GO:0016020,membrane	path:hsa04115 p53 signaling pathway - Homo sapiens (human)
FAM183A	0	6.90249	5.04371	0	0	1.69126	0	0	3.30294	3.64144	0	0	2.77532	0	6.60632	0	2.27293	41.122	0	5.00743	2.05818	5.7784	3.91829	1.47071	1.41321	1.04069	0.298022	0.513229	Not DEG
B2M	162064	96009.3	145649	66712.9	105848	65707.8	67680.1	58453.5	157371	93272.8	275128	135846	170281	232310	119682	75457.4	73374.6	69247.3	268179	177787	101877	159729	130803	0.648803	0.280998	2.30893	0.0209477	0.0866926	Not DEG	GO:0001895,retina homeostasis|GO:0001916,positive regulation of T cell mediated cytotoxicity|GO:0002237,response to molecule of bacterial origin|GO:0002474,antigen processing and presentation of peptide antigen via MHC class I|GO:0002479,antigen processing and presentation of exogenous peptide antigen via MHC class I, TAP-dependent|GO:0002480,antigen processing and presentation of exogenous pepti…	GO:0005515,protein binding|GO:0042802,identical protein binding	GO:0000139,Golgi membrane|GO:0005576,extracellular region|GO:0005615,extracellular space|GO:0005788,endoplasmic reticulum lumen|GO:0005794,Golgi apparatus|GO:0005829,cytosol|GO:0005886,plasma membrane|GO:0005886,plasma membrane|GO:0005925,focal adhesion|GO:0009897,external side of plasma membrane|GO:0012507,ER to Golgi transport vesicle membrane|GO:0016020,membrane|GO:0030670,phagocytic vesicle m…	path:hsa04612 Antigen processing and presentation - Homo sapiens (human)
OVCH1	37.1609	25.0215	14.2905	37.3532	75.1995	49.892	169.09	110.396	74.3161	64.6356	54.0346	114.561	36.0792	30.9624	82.579	81.567	196.608	222.924	118.968	61.341	65.7356	99.9624	82.849	0.607577	0.420693	1.44423	0.148674	0.327261	Not DEG	GO:0006508,proteolysis	GO:0004252,serine-type endopeptidase activity|GO:0046872,metal ion binding	GO:0005576,extracellular region
TOR4A	331.515	216.566	405.178	318.806	84.5994	249.46	208.386	304.203	270.015	390.544	435.879	280.674	927.882	718.866	147.541	237.822	468.223	662.28	609.293	704.795	277.927	519.325	398.626	0.901563	0.298689	3.0184	0.00254117	0.0195183	Not DEG	GO:0002576,platelet degranulation	GO:0005524,ATP binding	GO:0005576,extracellular region|GO:0016021,integral component of membrane|GO:0031093,platelet alpha granule lumen
FLG2	222.966	61.2596	115.165	132.039	187.999	265.527	59.5388	187.673	110.648	229.411	18.0115	95.4674	170.22	193.851	135.43	266.321	36.3668	160.159	66.7109	179.016	157.223	132.155	144.689	-0.249358	0.386243	-0.645599	0.518539	0.713001	Not DEG	GO:0043312,neutrophil degranulation|GO:0061436,establishment of skin barrier	GO:0005198,structural molecule activity|GO:0005509,calcium ion binding|GO:0046914,transition metal ion binding	GO:0005576,extracellular region|GO:0005634,nucleus|GO:0005737,cytoplasm|GO:0070062,extracellular exosome|GO:1904724,tertiary granule lumen
SPPL2A	2037.98	2887.83	3156.52	1835.52	3306.43	3117.83	2745.93	3001.55	2644	2833.95	2776.18	2875.48	2698.54	3074.03	3747.98	3870.01	3069.59	2887.2	3047.58	2909.32	2756.75	3095.59	2926.17	0.167367	0.110219	1.5185	0.128888	0.297784	Not DEG	GO:0006509,membrane protein ectodomain proteolysis|GO:0010803,regulation of tumor necrosis factor-mediated signaling pathway|GO:0031293,membrane protein intracellular domain proteolysis|GO:0031293,membrane protein intracellular domain proteolysis|GO:0033619,membrane protein proteolysis|GO:0050776,regulation of immune response	GO:0005515,protein binding|GO:0042500,aspartic endopeptidase activity, intramembrane cleaving|GO:0042500,aspartic endopeptidase activity, intramembrane cleaving|GO:0042803,protein homodimerization activity	GO:0005765,lysosomal membrane|GO:0005770,late endosome|GO:0005886,plasma membrane|GO:0005886,plasma membrane|GO:0016020,membrane|GO:0030660,Golgi-associated vesicle membrane|GO:0031902,late endosome membrane|GO:0043231,intracellular membrane-bounded organelle|GO:0070062,extracellular exosome|GO:0071458,integral component of cytoplasmic side of endoplasmic reticulum membrane|GO:0071556,integral co…
SPPL2C	0	0	7.56556	0	0	8.45628	7.14466	0	0	3.64144	0	9.54674	0	6.73095	0	12.7756	0	0	0	7.51114	2.68079	3.65644	3.16862	0.449709	1.64639	0.273149	0.784738	NA	Not DEG	GO:0006509,membrane protein ectodomain proteolysis|GO:0031293,membrane protein intracellular domain proteolysis	GO:0004190,aspartic-type endopeptidase activity|GO:0042803,protein homodimerization activity	GO:0005765,lysosomal membrane|GO:0005789,endoplasmic reticulum membrane|GO:0030660,Golgi-associated vesicle membrane|GO:0071458,integral component of cytoplasmic side of endoplasmic reticulum membrane|GO:0071556,integral component of lumenal side of endoplasmic reticulum membrane
SPPL2B	1298.68	805.003	1130.63	1369.91	939.993	826.178	1024.07	1144.44	1172.54	1439.28	630.403	742.736	848.323	819.83	883.044	746.879	1138.74	1222.84	812.761	1001.49	1115.07	884.704	999.888	-0.334217	0.138276	-2.41702	0.015648	0.0708144	Not DEG	GO:0006509,membrane protein ectodomain proteolysis|GO:0010803,regulation of tumor necrosis factor-mediated signaling pathway|GO:0031293,membrane protein intracellular domain proteolysis|GO:0031293,membrane protein intracellular domain proteolysis|GO:0033619,membrane protein proteolysis|GO:0050776,regulation of immune response	GO:0005515,protein binding|GO:0042500,aspartic endopeptidase activity, intramembrane cleaving|GO:0042500,aspartic endopeptidase activity, intramembrane cleaving|GO:0042500,aspartic endopeptidase activity, intramembrane cleaving|GO:0042500,aspartic endopeptidase activity, intramembrane cleaving|GO:0042803,protein homodimerization activity	GO:0000139,Golgi membrane|GO:0005654,nucleoplasm|GO:0005765,lysosomal membrane|GO:0005813,centrosome|GO:0005886,plasma membrane|GO:0005886,plasma membrane|GO:0010008,endosome membrane|GO:0015629,actin cytoskeleton|GO:0016020,membrane|GO:0030660,Golgi-associated vesicle membrane|GO:0071458,integral component of cytoplasmic side of endoplasmic reticulum membrane|GO:0071556,integral component of lum…
NSL1	3127.39	2805	2163.75	2100.47	2888.13	2954.62	3243.67	3199.04	3135.31	3253.63	2932.28	2579.53	2741.09	2482.37	2570.96	3626.29	3646.91	3551.64	2856.34	2772.86	2887.1	2976.03	2931.56	0.0438146	0.107958	0.405848	0.684854	0.828534	Not DEG	GO:0000070,mitotic sister chromatid segregation|GO:0007062,sister chromatid cohesion|GO:0051301,cell division	GO:0005515,protein binding	GO:0000444,MIS12/MIND type complex|GO:0000777,condensed chromosome kinetochore|GO:0005654,nucleoplasm|GO:0005829,cytosol|GO:0005829,cytosol|GO:0016607,nuclear speck
ITGA9	13269.4	18142.3	13510.4	17461.3	19354.5	13311	12376.9	15419.9	12324.1	11727.3	21324.4	14955.9	30054.9	24065.8	18545	12930.8	12046.5	29921.7	7750.7	13467.5	14689.7	18506.3	16598	0.333235	0.209143	1.59334	0.111085	0.27049	Not DEG	GO:0007155,cell adhesion|GO:0007229,integrin-mediated signaling pathway|GO:0030198,extracellular matrix organization|GO:0030593,neutrophil chemotaxis|GO:0042060,wound healing	GO:0005518,collagen binding|GO:0043236,laminin binding|GO:0046872,metal ion binding	GO:0005886,plasma membrane|GO:0008305,integrin complex|GO:0009925,basal plasma membrane|GO:0034679,integrin alpha9-beta1 complex	path:hsa04151 PI3K-Akt signaling pathway - Homo sapiens (human)|path:hsa04510 Focal adhesion - Homo sapiens (human)|path:hsa04512 ECM-receptor interaction - Homo sapiens (human)|path:hsa04514 Cell adhesion molecules (CAMs) - Homo sapiens (human)|path:hsa04810 Regulation of actin cytoskeleton - Homo sapiens (human)|path:hsa05410 Hypertrophic cardiomyopathy (HCM) - Homo sapiens (human)|path:hsa0541…
UGCG	2059.5	1615.18	3059.85	1399.44	1861.19	1794.42	1194.35	2107.34	2995.76	1280.88	2986.31	2211.02	1907.57	2561.13	2370.57	2017.56	2141.1	2848.24	3186.56	2348.48	1936.79	2457.85	2197.32	0.34352	0.172168	1.99526	0.0460143	0.14972	Not DEG	GO:0006679,glucosylceramide biosynthetic process|GO:0006687,glycosphingolipid metabolic process|GO:0006688,glycosphingolipid biosynthetic process|GO:0008544,epidermis development|GO:1903955,positive regulation of protein targeting to mitochondrion	GO:0008120,ceramide glucosyltransferase activity|GO:0008120,ceramide glucosyltransferase activity|GO:0102769,dihydroceramide glucosyltransferase activity	GO:0000139,Golgi membrane|GO:0016020,membrane|GO:0016021,integral component of membrane	path:hsa00600 Sphingolipid metabolism - Homo sapiens (human)|path:hsa01100 Metabolic pathways - Homo sapiens (human)
MYO3B	1327.04	1586.71	1392.9	601.127	1499.29	957.251	970.483	1325.98	654.807	707.35	4179.87	1937.99	2195.28	1205.51	1505.14	949.322	1351.26	1650.29	1014.01	2640.17	1102.29	1862.88	1482.59	0.756994	0.261686	2.89276	0.00381873	0.0261132	Not DEG	GO:0006468,protein phosphorylation|GO:0007601,visual perception|GO:0007605,sensory perception of sound|GO:0050896,response to stimulus|GO:0090103,cochlea morphogenesis	GO:0003774,motor activity|GO:0003779,actin binding|GO:0004674,protein serine/threonine kinase activity|GO:0005524,ATP binding	GO:0005737,cytoplasm|GO:0016459,myosin complex|GO:0032426,stereocilium tip
ATP2A1	325.647	138.05	270.679	496.885	334.873	320.493	316.746	247.778	248.546	365.965	38500.2	112.651	200.748	636.748	245.535	222.098	231.839	199.117	194.573	254.127	306.566	4079.77	281.543	-0.255342	0.256056	-0.997212	0.318662	0.534357	Not DEG	GO:0006816,calcium ion transport|GO:0008637,apoptotic mitochondrial changes|GO:0031448,positive regulation of fast-twitch skeletal muscle fiber contraction|GO:0032470,positive regulation of endoplasmic reticulum calcium ion concentration|GO:0032471,negative regulation of endoplasmic reticulum calcium ion concentration|GO:0034220,ion transmembrane transport|GO:0034976,response to endoplasmic retic…	GO:0005388,calcium-transporting ATPase activity|GO:0005388,calcium-transporting ATPase activity|GO:0005509,calcium ion binding|GO:0005515,protein binding|GO:0005524,ATP binding|GO:0042803,protein homodimerization activity	GO:0005739,mitochondrion|GO:0005789,endoplasmic reticulum membrane|GO:0016021,integral component of membrane|GO:0016529,sarcoplasmic reticulum|GO:0031095,platelet dense tubular network membrane|GO:0033017,sarcoplasmic reticulum membrane|GO:0033017,sarcoplasmic reticulum membrane|GO:0033017,sarcoplasmic reticulum membrane|GO:0034704,calcium channel complex	path:hsa04020 Calcium signaling pathway - Homo sapiens (human)|path:hsa04022 cGMP-PKG signaling pathway - Homo sapiens (human)|path:hsa04972 Pancreatic secretion - Homo sapiens (human)|path:hsa05010 Alzheimer's disease - Homo sapiens (human)
ATP2A2	22162.6	30695.4	31827.5	26592.9	36297.8	29280.7	27554.6	31660.4	27560.5	36586.5	42567.2	23019.1	23964	26040.7	36633.1	29643.2	24647.6	27433.8	20947.2	22624.8	30021.9	27752.1	28887	-0.113425	0.132141	-0.858359	0.390694	0.605074	Not DEG	GO:0002026,regulation of the force of heart contraction|GO:0006984,ER-nucleus signaling pathway|GO:0006996,organelle organization|GO:0007155,cell adhesion|GO:0008544,epidermis development|GO:0010460,positive regulation of heart rate|GO:0010882,regulation of cardiac muscle contraction by calcium ion signaling|GO:0014883,transition between fast and slow fiber|GO:0014898,cardiac muscle hypertrophy i…	GO:0005388,calcium-transporting ATPase activity|GO:0005388,calcium-transporting ATPase activity|GO:0005509,calcium ion binding|GO:0005515,protein binding|GO:0005524,ATP binding|GO:0019899,enzyme binding|GO:0031775,lutropin-choriogonadotropic hormone receptor binding|GO:0044548,S100 protein binding|GO:0086039,calcium-transporting ATPase activity involved in regulation of cardiac muscle cell membra…	GO:0005654,nucleoplasm|GO:0005783,endoplasmic reticulum|GO:0005789,endoplasmic reticulum membrane|GO:0005789,endoplasmic reticulum membrane|GO:0005887,integral component of plasma membrane|GO:0012506,vesicle membrane|GO:0016020,membrane|GO:0016529,sarcoplasmic reticulum|GO:0031095,platelet dense tubular network membrane|GO:0031234,extrinsic component of cytoplasmic side of plasma membrane|GO:0033…	path:hsa04020 Calcium signaling pathway - Homo sapiens (human)|path:hsa04022 cGMP-PKG signaling pathway - Homo sapiens (human)|path:hsa04024 cAMP signaling pathway - Homo sapiens (human)|path:hsa04260 Cardiac muscle contraction - Homo sapiens (human)|path:hsa04261 Adrenergic signaling in cardiomyocytes - Homo sapiens (human)|path:hsa04919 Thyroid hormone signaling pathway - Homo sapiens (human)|p…
ATP2A3	2346.03	597.928	3244.79	1702.61	1438.19	1252.37	935.95	1195.96	4506.86	695.515	1162.34	754.192	2775.32	941.66	1550.28	1605.79	1288.75	1847.24	4189.45	965.182	1791.62	1708.02	1749.82	-0.0690635	0.360914	-0.191357	0.848246	0.925534	Not DEG	GO:0006810,transport|GO:0006816,calcium ion transport|GO:0034220,ion transmembrane transport|GO:0070588,calcium ion transmembrane transport|GO:0099132,ATP hydrolysis coupled cation transmembrane transport|GO:1903779,regulation of cardiac conduction	GO:0005388,calcium-transporting ATPase activity|GO:0005524,ATP binding|GO:0046872,metal ion binding	GO:0005783,endoplasmic reticulum|GO:0005789,endoplasmic reticulum membrane|GO:0016021,integral component of membrane|GO:0016529,sarcoplasmic reticulum|GO:0031095,platelet dense tubular network membrane|GO:0031965,nuclear membrane|GO:0033017,sarcoplasmic reticulum membrane	path:hsa04020 Calcium signaling pathway - Homo sapiens (human)|path:hsa04022 cGMP-PKG signaling pathway - Homo sapiens (human)|path:hsa04972 Pancreatic secretion - Homo sapiens (human)|path:hsa05010 Alzheimer's disease - Homo sapiens (human)
HSD11B1L	94.8582	108.714	89.9461	150.282	58.7496	115.851	138.13	110.396	123.86	157.492	104.467	108.833	163.744	117.792	102.398	84.5152	61.369	85.4904	65.5991	212.816	114.828	110.702	112.765	-0.0541002	0.229847	-0.235375	0.813918	0.906488	Not DEG	GO:0055114,oxidation-reduction process	GO:0016491,oxidoreductase activity	GO:0005576,extracellular region|GO:0005654,nucleoplasm|GO:0043231,intracellular membrane-bounded organelle
ITGA2	2685.37	2062.12	3315.4	1465.46	2742.43	1864.61	2739.98	1182.47	1408.7	1798.87	22423.1	19145	33793.2	34159.6	3274.53	2250.46	5786.87	14584.2	13711.3	19536.5	2126.54	16866.5	9496.51	2.9876	0.375173	7.96327	1.67546e-15	1.45162e-12	Up	GO:0001666,response to hypoxia|GO:0002687,positive regulation of leukocyte migration|GO:0006929,substrate-dependent cell migration|GO:0006971,hypotonic response|GO:0007155,cell adhesion|GO:0007160,cell-matrix adhesion|GO:0007229,integrin-mediated signaling pathway|GO:0007565,female pregnancy|GO:0007596,blood coagulation|GO:0008283,cell proliferation|GO:0009887,animal organ morphogenesis|GO:001063…	GO:0001540,amyloid-beta binding|GO:0001618,virus receptor activity|GO:0005178,integrin binding|GO:0005515,protein binding|GO:0005518,collagen binding|GO:0032403,protein complex binding|GO:0038064,collagen receptor activity|GO:0043236,laminin binding|GO:0043395,heparan sulfate proteoglycan binding|GO:0046872,metal ion binding|GO:0046982,protein heterodimerization activity|GO:0098639,collagen bindi…	GO:0005634,nucleus|GO:0005886,plasma membrane|GO:0005886,plasma membrane|GO:0005925,focal adhesion|GO:0008305,integrin complex|GO:0009897,external side of plasma membrane|GO:0009986,cell surface|GO:0030424,axon|GO:0034666,integrin alpha2-beta1 complex|GO:0043679,axon terminus|GO:0045178,basal part of cell|GO:0048471,perinuclear region of cytoplasm	path:hsa04145 Phagosome - Homo sapiens (human)|path:hsa04151 PI3K-Akt signaling pathway - Homo sapiens (human)|path:hsa04510 Focal adhesion - Homo sapiens (human)|path:hsa04512 ECM-receptor interaction - Homo sapiens (human)|path:hsa04611 Platelet activation - Homo sapiens (human)|path:hsa04640 Hematopoietic cell lineage - Homo sapiens (human)|path:hsa04810 Regulation of actin cytoskeleton - Homo…
NOP2	1788.61	1364.97	1978.81	2270.73	2344.11	1750.45	1324.14	1793.32	1935.52	1990.96	1841.98	1468.29	2774.39	1704.28	1983	1455.43	1774.02	2004.16	1883.47	1899.07	1854.16	1878.81	1866.49	0.0189786	0.127455	0.148905	0.881629	0.941505	Not DEG	GO:0000027,ribosomal large subunit assembly|GO:0000470,maturation of LSU-rRNA|GO:0006357,regulation of transcription from RNA polymerase II promoter|GO:0008284,positive regulation of cell proliferation|GO:0070475,rRNA base methylation|GO:1901796,regulation of signal transduction by p53 class mediator	GO:0003723,RNA binding|GO:0005515,protein binding|GO:0009383,rRNA (cytosine-C5-)-methyltransferase activity	GO:0005654,nucleoplasm|GO:0005730,nucleolus
ITGA4	2826.19	374.46	4115.67	599.389	2428.71	1190.64	1134.81	1145.67	6415.13	1086.06	2857.83	2011.5	1906.64	2542.28	3003.67	2059.81	2419.53	3210.76	10472.5	1632.42	2131.67	3211.69	2671.68	0.591277	0.431145	1.37141	0.170246	0.358013	Not DEG	GO:0003366,cell-matrix adhesion involved in ameboidal cell migration|GO:0007159,leukocyte cell-cell adhesion|GO:0007160,cell-matrix adhesion|GO:0007229,integrin-mediated signaling pathway|GO:0030183,B cell differentiation|GO:0030198,extracellular matrix organization|GO:0034113,heterotypic cell-cell adhesion|GO:0034446,substrate adhesion-dependent cell spreading|GO:0035987,endodermal cell differen…	GO:0001968,fibronectin binding|GO:0005515,protein binding|GO:0015026,coreceptor activity|GO:0019960,C-X3-C chemokine binding|GO:0046872,metal ion binding|GO:0050839,cell adhesion molecule binding|GO:0050839,cell adhesion molecule binding|GO:1990405,protein antigen binding	GO:0005886,plasma membrane|GO:0005886,plasma membrane|GO:0005925,focal adhesion|GO:0009986,cell surface|GO:0016020,membrane|GO:0034669,integrin alpha4-beta7 complex|GO:0070062,extracellular exosome	path:hsa04151 PI3K-Akt signaling pathway - Homo sapiens (human)|path:hsa04510 Focal adhesion - Homo sapiens (human)|path:hsa04512 ECM-receptor interaction - Homo sapiens (human)|path:hsa04514 Cell adhesion molecules (CAMs) - Homo sapiens (human)|path:hsa04640 Hematopoietic cell lineage - Homo sapiens (human)|path:hsa04670 Leukocyte transendothelial migration - Homo sapiens (human)|path:hsa04672 I…
RIT2	0	0	1.68124	0	4.69997	0	0	0	0	0	0	0	0	0	2.20211	0	0	0	0	0	0.63812	0.220211	0.429165	-1.16514	3.01012	-0.387075	0.698701	NA	Not DEG	GO:0000165,MAPK cascade|GO:0007264,small GTPase mediated signal transduction|GO:0007265,Ras protein signal transduction|GO:0007268,chemical synaptic transmission|GO:0010976,positive regulation of neuron projection development|GO:0010976,positive regulation of neuron projection development|GO:0010977,negative regulation of neuron projection development|GO:0030100,regulation of endocytosis|GO:00324…	GO:0003682,chromatin binding|GO:0003924,GTPase activity|GO:0003924,GTPase activity|GO:0005515,protein binding|GO:0005516,calmodulin binding|GO:0005516,calmodulin binding|GO:0005525,GTP binding|GO:0030215,semaphorin receptor binding|GO:0042802,identical protein binding	GO:0005634,nucleus|GO:0005634,nucleus|GO:0005737,cytoplasm|GO:0005886,plasma membrane|GO:0005886,plasma membrane|GO:0005886,plasma membrane|GO:0043005,neuron projection|GO:0044297,cell body|GO:0045121,membrane raft|GO:0097447,dendritic tree
ITGA6	9610.99	7924.92	8616.33	6217.14	10038	10200	12492.4	7797.65	10419.9	7395.76	24761	12312.4	9869.04	10748.7	11060.1	11966.8	28063.8	16771.3	24223.8	9885.91	9071.31	15966.3	12518.8	0.815635	0.211377	3.85868	0.000114003	0.00184104	Not DEG	GO:0007044,cell-substrate junction assembly|GO:0007160,cell-matrix adhesion|GO:0007229,integrin-mediated signaling pathway|GO:0010668,ectodermal cell differentiation|GO:0010811,positive regulation of cell-substrate adhesion|GO:0022409,positive regulation of cell-cell adhesion|GO:0030198,extracellular matrix organization|GO:0030335,positive regulation of cell migration|GO:0031581,hemidesmosome ass…	GO:0005178,integrin binding|GO:0005515,protein binding|GO:0031994,insulin-like growth factor I binding|GO:0038132,neuregulin binding|GO:0043236,laminin binding|GO:0045296,cadherin binding|GO:0046872,metal ion binding	GO:0005604,basement membrane|GO:0005886,plasma membrane|GO:0005886,plasma membrane|GO:0005913,cell-cell adherens junction|GO:0005925,focal adhesion|GO:0009897,external side of plasma membrane|GO:0009925,basal plasma membrane|GO:0009986,cell surface|GO:0030056,hemidesmosome|GO:0030175,filopodium|GO:0034676,integrin alpha6-beta4 complex	path:hsa04151 PI3K-Akt signaling pathway - Homo sapiens (human)|path:hsa04510 Focal adhesion - Homo sapiens (human)|path:hsa04512 ECM-receptor interaction - Homo sapiens (human)|path:hsa04514 Cell adhesion molecules (CAMs) - Homo sapiens (human)|path:hsa04640 Hematopoietic cell lineage - Homo sapiens (human)|path:hsa04810 Regulation of actin cytoskeleton - Homo sapiens (human)|path:hsa05145 Toxop…
ITGA7	1077.67	987.056	1206.29	1564.49	848.344	1036.74	1312.24	1745.49	962.806	1122.47	1873.2	1358.5	3741.13	1498.31	1140.69	1290.33	3258.24	4995.24	1324.21	3100.85	1186.36	2358.07	1772.21	0.991083	0.260777	3.8005	0.000144403	0.00223811	Not DEG	GO:0007160,cell-matrix adhesion|GO:0007229,integrin-mediated signaling pathway|GO:0007517,muscle organ development|GO:0008360,regulation of cell shape|GO:0030198,extracellular matrix organization|GO:0034113,heterotypic cell-cell adhesion|GO:0035987,endodermal cell differentiation	GO:0005515,protein binding|GO:0046872,metal ion binding	GO:0005886,plasma membrane|GO:0008305,integrin complex|GO:0009986,cell surface	path:hsa04151 PI3K-Akt signaling pathway - Homo sapiens (human)|path:hsa04510 Focal adhesion - Homo sapiens (human)|path:hsa04512 ECM-receptor interaction - Homo sapiens (human)|path:hsa04810 Regulation of actin cytoskeleton - Homo sapiens (human)|path:hsa05410 Hypertrophic cardiomyopathy (HCM) - Homo sapiens (human)|path:hsa05412 Arrhythmogenic right ventricular cardiomyopathy (ARVC) - Homo sapi…
TRHR	0	12.9422	20.1748	25.1917	245.573	21.1407	44.0587	13.4929	37.158	3.64144	48.0307	32.4589	10.1762	18.1736	124.419	51.1022	168.197	239.157	17.7896	10.0149	42.3374	71.9518	57.1446	0.76734	0.745642	1.0291	0.303433	0.518682	Not DEG	GO:0007186,G-protein coupled receptor signaling pathway	GO:0004997,thyrotropin-releasing hormone receptor activity	GO:0005886,plasma membrane|GO:0005887,integral component of plasma membrane	path:hsa04020 Calcium signaling pathway - Homo sapiens (human)|path:hsa04080 Neuroactive ligand-receptor interaction - Homo sapiens (human)
ARF4	6672.34	8332.17	8449.05	5400.58	13279.8	8578.89	7057.73	10666.7	8903.89	9463.19	7865.03	7719.49	6740.33	8579.27	13921.7	9083.42	7741.59	7107.61	6899.02	6339.4	8680.43	8199.69	8440.06	-0.0821456	0.16094	-0.51041	0.609764	0.778004	Not DEG	GO:0006471,protein ADP-ribosylation|GO:0006888,ER to Golgi vesicle-mediated transport|GO:0006890,retrograde vesicle-mediated transport, Golgi to ER|GO:0006890,retrograde vesicle-mediated transport, Golgi to ER|GO:0007264,small GTPase mediated signal transduction|GO:0015031,protein transport|GO:0016477,cell migration|GO:0031584,activation of phospholipase D activity|GO:0043066,negative regulation …	GO:0003924,GTPase activity|GO:0005086,ARF guanyl-nucleotide exchange factor activity|GO:0005154,epidermal growth factor receptor binding|GO:0005515,protein binding|GO:0005525,GTP binding	GO:0005794,Golgi apparatus|GO:0005829,cytosol|GO:0005829,cytosol|GO:0016020,membrane|GO:0031012,extracellular matrix|GO:0032587,ruffle membrane|GO:0043197,dendritic spine|GO:0070062,extracellular exosome
LOC285556	15.6467	27.61	23.5373	69.4944	14.0999	37.2076	65.4927	35.5721	21.4691	81.9324	2863.83	26.7309	0	57.8862	18.7179	30.4648	0	0	0	10.0149	39.2062	300.765	28.1147	-1.19734	0.77178	-1.5514	0.120806	0.286719	Not DEG
LOC102724957	0	0	0	0	0	0	0	0	0	0	0	2.86402	0	0	0	0	0	0	0	0	0	0.286402	0.143201	0.966627	3.02601	0.319439	0.749393	NA	Not DEG
DENND4A	10487.2	15347.7	14434.3	8754.56	16277.2	11062.5	14020.2	11001.6	11739.5	10697.6	14158.3	13750.2	9002.21	11143.1	16546.6	13068.4	15020.6	8900.75	13420	8203.42	12382.2	12321.4	12351.8	-0.00710226	0.147523	-0.0481434	0.961602	0.981541	Not DEG	GO:0006351,transcription, DNA-templated|GO:0006355,regulation of transcription, DNA-templated|GO:0065009,regulation of molecular function	GO:0003677,DNA binding|GO:0017112,Rab guanyl-nucleotide exchange factor activity|GO:0017112,Rab guanyl-nucleotide exchange factor activity	GO:0005634,nucleus|GO:0005829,cytosol
DENND4B	2493.69	1680.76	2634.5	2634.71	2387.58	2051.49	2312.49	2390.69	3304.59	2242.22	1982.47	1642.04	2527.39	2291.89	2092	1752.22	2201.33	3314.65	3120.96	2611.37	2413.27	2353.63	2383.45	-0.0362326	0.138754	-0.26113	0.793993	0.894742	Not DEG	GO:0032483,regulation of Rab protein signal transduction|GO:0065009,regulation of molecular function	GO:0017112,Rab guanyl-nucleotide exchange factor activity|GO:0017112,Rab guanyl-nucleotide exchange factor activity	GO:0005634,nucleus|GO:0005794,Golgi apparatus|GO:0005829,cytosol
CT55	0	6.03968	6.72494	2.60604	10.5749	8.45628	0	24.5325	6.60587	0	2.40154	0	9.25106	0	0	3.93094	0	0	0	0	6.55402	1.55835	4.05619	-2.05597	1.29402	-1.58882	0.112101	0.2724	Not DEG		GO:0005515,protein binding
ELL3	296.31	285.591	653.16	321.412	551.071	331.486	410.818	439.131	982.624	381.441	230.547	280.674	538.412	469.147	579.154	350.836	252.295	333.305	392.483	325.483	465.304	375.234	420.269	-0.310028	0.237669	-1.30445	0.192079	0.387152	Not DEG	GO:0006354,DNA-templated transcription, elongation|GO:0006366,transcription from RNA polymerase II promoter|GO:0006368,transcription elongation from RNA polymerase II promoter|GO:0007283,spermatogenesis|GO:0010717,regulation of epithelial to mesenchymal transition|GO:0032786,positive regulation of DNA-templated transcription, elongation|GO:0042795,snRNA transcription from RNA polymerase II promot…	GO:0005515,protein binding|GO:0035326,enhancer binding	GO:0005634,nucleus|GO:0005654,nucleoplasm|GO:0005654,nucleoplasm|GO:0005730,nucleolus|GO:0008023,transcription elongation factor complex|GO:0008023,transcription elongation factor complex
SWAP70	7707.96	7514.22	7979.99	7433.3	9881.68	7349.35	7909.13	7503.26	9522.37	5827.21	9454.85	8003.98	7312.97	8520.71	10101.1	8104.62	9994.06	9297.9	10227.9	7804.08	7862.85	8882.21	8372.53	0.175854	0.094868	1.85367	0.0637867	0.187148	Not DEG	GO:0007204,positive regulation of cytosolic calcium ion concentration|GO:0030835,negative regulation of actin filament depolymerization|GO:0032233,positive regulation of actin filament bundle assembly|GO:0032880,regulation of protein localization|GO:0033633,negative regulation of cell-cell adhesion mediated by integrin|GO:0045190,isotype switching|GO:0051017,actin filament bundle assembly|GO:0060…	GO:0003677,DNA binding|GO:0005509,calcium ion binding|GO:0005515,protein binding|GO:0005524,ATP binding|GO:0045296,cadherin binding	GO:0005634,nucleus|GO:0005737,cytoplasm|GO:0005856,cytoskeleton|GO:0005886,plasma membrane|GO:0030027,lamellipodium
RARRES1	241.546	137.187	323.638	107.716	280.823	286.668	216.721	240.418	316.256	257.632	210.134	592.852	194.272	319.047	360.044	400.956	229.566	670.938	432.509	267.897	240.861	367.822	304.341	0.610978	0.249132	2.45243	0.0141897	0.0663251	Not DEG	GO:0008285,negative regulation of cell proliferation		GO:0016021,integral component of membrane|GO:0070062,extracellular exosome
UFSP1	32.2713	33.6496	41.1903	21.717	39.9497	18.6038	30.9602	46.6117	18.1662	60.0838	16.8107	17.1841	26.8281	10.0964	33.0316	27.5166	27.2751	45.4506	24.4607	22.5334	34.3204	25.1187	29.7196	-0.452589	0.292192	-1.54895	0.121395	0.287525	Not DEG	GO:0006508,proteolysis|GO:0008150,biological_process	GO:0003674,molecular_function|GO:0071567,UFM1 hydrolase activity	GO:0070062,extracellular exosome
PHLDA3	527.099	395.168	617.014	608.076	628.621	542.047	410.818	751.921	551.59	286.763	1272.81	720.779	1401.54	1153.69	500.979	659.415	1077.37	1503.12	1097.39	1527.27	531.912	1091.44	811.673	1.03712	0.207831	4.99023	6.03069e-07	2.65903e-05	Up	GO:0009653,anatomical structure morphogenesis|GO:0042771,intrinsic apoptotic signaling pathway in response to DNA damage by p53 class mediator|GO:0043065,positive regulation of apoptotic process|GO:0051898,negative regulation of protein kinase B signaling	GO:0005546,phosphatidylinositol-4,5-bisphosphate binding|GO:0005547,phosphatidylinositol-3,4,5-trisphosphate binding|GO:0010314,phosphatidylinositol-5-phosphate binding|GO:0032266,phosphatidylinositol-3-phosphate binding|GO:0043325,phosphatidylinositol-3,4-bisphosphate binding|GO:0080025,phosphatidylinositol-3,5-bisphosphate binding	GO:0005737,cytoplasm|GO:0005886,plasma membrane|GO:0070062,extracellular exosome
PHLDA2	110.505	54.3571	119.368	74.7065	195.049	32.1339	30.9602	76.0507	71.0131	84.6635	211.335	205.255	939.908	380.972	145.339	58.9641	129.557	170.981	339.114	749.862	84.8806	333.129	209.005	1.97343	0.427557	4.6156	3.9196e-06	0.000126951	Up	GO:0001890,placenta development|GO:0006915,apoptotic process|GO:0009887,animal organ morphogenesis|GO:0010468,regulation of gene expression|GO:0030334,regulation of cell migration|GO:0060721,regulation of spongiotrophoblast cell proliferation|GO:0070873,regulation of glycogen metabolic process|GO:1903547,regulation of growth hormone activity		GO:0005737,cytoplasm|GO:0016020,membrane
SLC17A3	0	2.58843	0	1.73736	0	0	0	4.9065	0	5.46216	2.40154	5.72804	2.77532	1.34619	6.60632	4.91368	7.95524	4.32863	4.44739	8.763	1.46945	4.92653	3.19799	1.75134	0.805726	2.17362	0.0297335	NA	Up	GO:0006814,sodium ion transport|GO:0006817,phosphate ion transport|GO:0006855,drug transmembrane transport|GO:0015711,organic anion transport|GO:0015747,urate transport|GO:0015760,glucose-6-phosphate transport|GO:0015893,drug transport|GO:0034220,ion transmembrane transport|GO:0035435,phosphate ion transmembrane transport|GO:0035725,sodium ion transmembrane transport|GO:0046415,urate metabolic pr…	GO:0005436,sodium:phosphate symporter activity|GO:0005436,sodium:phosphate symporter activity|GO:0005436,sodium:phosphate symporter activity|GO:0008308,voltage-gated anion channel activity|GO:0008514,organic anion transmembrane transporter activity|GO:0015143,urate transmembrane transporter activity|GO:0015143,urate transmembrane transporter activity|GO:0015238,drug transmembrane transporter acti…	GO:0005737,cytoplasm|GO:0005789,endoplasmic reticulum membrane|GO:0005789,endoplasmic reticulum membrane|GO:0005886,plasma membrane|GO:0005887,integral component of plasma membrane|GO:0016324,apical plasma membrane|GO:0031526,brush border membrane|GO:0048471,perinuclear region of cytoplasm
GAP43	7.82335	3.45125	6.72494	19.9796	82.2494	0	10.717	0	0	0	297.79	443.923	987.089	294.143	25.3242	3.93094	136.376	298.675	197.909	167.749	13.0946	285.291	149.193	4.45242	0.887067	5.01925	5.18725e-07	2.32372e-05	Up	GO:0007205,protein kinase C-activating G-protein coupled receptor signaling pathway|GO:0007411,axon guidance|GO:0009611,response to wounding|GO:0010001,glial cell differentiation|GO:0016198,axon choice point recognition|GO:0040008,regulation of growth|GO:0042246,tissue regeneration|GO:0045165,cell fate commitment|GO:0051489,regulation of filopodium assembly|GO:0061564,axon development	GO:0001786,phosphatidylserine binding|GO:0005515,protein binding|GO:0005516,calmodulin binding|GO:0035727,lysophosphatidic acid binding|GO:1901981,phosphatidylinositol phosphate binding	GO:0005737,cytoplasm|GO:0005886,plasma membrane|GO:0005886,plasma membrane|GO:0014069,postsynaptic density|GO:0030054,cell junction|GO:0030424,axon|GO:0031527,filopodium membrane|GO:0032584,growth cone membrane
PAMR1	552.524	437.445	330.363	301.432	85.7744	657.898	696.604	244.098	262.583	381.441	434.678	489.748	115.638	124.523	419.501	921.806	414.809	633.062	409.16	246.616	395.016	420.954	407.985	0.0914298	0.356903	0.256176	0.797815	0.897115	Not DEG		GO:0005509,calcium ion binding	GO:0005615,extracellular space
SQLE	1164.7	1395.17	1387.02	1147.53	2140.83	1471.39	870.457	1259.74	1438.43	1450.2	650.816	1145.61	684.579	720.885	2203.21	1259.87	1004.63	800.797	1389.81	870.041	1372.55	1073.02	1222.79	-0.355309	0.209939	-1.69244	0.0905614	0.236226	Not DEG	GO:0006695,cholesterol biosynthetic process|GO:0006725,cellular aromatic compound metabolic process|GO:0008203,cholesterol metabolic process|GO:0010033,response to organic substance|GO:0016126,sterol biosynthetic process|GO:0016126,sterol biosynthetic process|GO:0045540,regulation of cholesterol biosynthetic process|GO:0055114,oxidation-reduction process	GO:0004506,squalene monooxygenase activity|GO:0004506,squalene monooxygenase activity|GO:0004506,squalene monooxygenase activity|GO:0050660,flavin adenine dinucleotide binding	GO:0005783,endoplasmic reticulum|GO:0005789,endoplasmic reticulum membrane|GO:0016021,integral component of membrane|GO:0031090,organelle membrane	path:hsa00100 Steroid biosynthesis - Homo sapiens (human)|path:hsa01100 Metabolic pathways - Homo sapiens (human)
MRPL28	737.351	771.353	854.909	1172.72	954.093	697.643	775.195	682.003	821.606	931.298	764.889	812.427	1114.75	816.464	718.988	505.126	612.554	780.236	938.4	1049.06	839.817	811.289	825.553	-0.0500857	0.139882	-0.358056	0.720302	0.851623	Not DEG	GO:0006412,translation|GO:0070125,mitochondrial translational elongation|GO:0070126,mitochondrial translational termination	GO:0003723,RNA binding|GO:0003735,structural constituent of ribosome|GO:0003735,structural constituent of ribosome|GO:0005515,protein binding	GO:0005739,mitochondrion|GO:0005743,mitochondrial inner membrane|GO:0005761,mitochondrial ribosome|GO:0005761,mitochondrial ribosome|GO:0005762,mitochondrial large ribosomal subunit|GO:0005829,cytosol	path:hsa03010 Ribosome - Homo sapiens (human)
HRH4	15.6467	12.0794	26.0592	3.47472	19.9749	6.76502	39.2956	23.3059	10.7345	14.5658	10.8069	19.0935	12.0264	32.3086	0	26.5339	23.8657	15.1502	8.89479	10.0149	17.1902	15.8695	16.5298	-0.0969476	0.483539	-0.200496	0.841093	0.921836	Not DEG	GO:0006954,inflammatory response|GO:0007186,G-protein coupled receptor signaling pathway|GO:0007194,negative regulation of adenylate cyclase activity|GO:0007204,positive regulation of cytosolic calcium ion concentration|GO:0008150,biological_process|GO:0043408,regulation of MAPK cascade	GO:0004969,histamine receptor activity|GO:0004969,histamine receptor activity	GO:0005886,plasma membrane|GO:0016021,integral component of membrane	path:hsa04080 Neuroactive ligand-receptor interaction - Homo sapiens (human)
FBXL12	659.118	389.991	626.26	1007.67	454.722	404.21	213.149	563.02	694.443	390.544	398.655	726.507	649.425	339.24	86.9832	299.734	373.896	366.851	637.089	737.344	540.313	461.572	500.943	-0.227613	0.305125	-0.745969	0.455686	0.664098	Not DEG	GO:0000209,protein polyubiquitination|GO:0006511,ubiquitin-dependent protein catabolic process|GO:0043687,post-translational protein modification	GO:0004842,ubiquitin-protein transferase activity|GO:0004842,ubiquitin-protein transferase activity|GO:0005515,protein binding	GO:0000151,ubiquitin ligase complex|GO:0005829,cytosol
FBXL15	120.284	182.053	212.676	129.433	155.099	181.81	194.097	165.594	205.608	292.226	105.668	184.252	324.712	209.333	188.28	134.635	226.156	284.607	203.468	244.112	183.888	210.522	197.205	0.19487	0.198121	0.983589	0.325318	0.540989	Not DEG	GO:0000086,G2/M transition of mitotic cell cycle|GO:0000209,protein polyubiquitination|GO:0009953,dorsal/ventral pattern formation|GO:0016567,protein ubiquitination|GO:0030282,bone mineralization|GO:0030513,positive regulation of BMP signaling pathway|GO:0031146,SCF-dependent proteasomal ubiquitin-dependent protein catabolic process|GO:0043687,post-translational protein modification	GO:0004842,ubiquitin-protein transferase activity|GO:0004842,ubiquitin-protein transferase activity|GO:0004842,ubiquitin-protein transferase activity|GO:0005515,protein binding	GO:0005737,cytoplasm|GO:0005829,cytosol|GO:0019005,SCF ubiquitin ligase complex
CYP27B1	103.659	144.09	190.82	61.6763	83.4244	128.535	209.577	149.648	42.1124	75.5599	45.6292	163.249	73.0834	116.445	67.1642	90.4116	106.828	115.791	97.8427	155.23	118.91	103.167	111.039	-0.20312	0.288152	-0.704907	0.480868	0.68327	Not DEG	GO:0006766,vitamin metabolic process|GO:0006816,calcium ion transport|GO:0008285,negative regulation of cell proliferation|GO:0010956,negative regulation of calcidiol 1-monooxygenase activity|GO:0010980,positive regulation of vitamin D 24-hydroxylase activity|GO:0030282,bone mineralization|GO:0030308,negative regulation of cell growth|GO:0030500,regulation of bone mineralization|GO:0032496,respon…	GO:0004498,calcidiol 1-monooxygenase activity|GO:0004498,calcidiol 1-monooxygenase activity|GO:0005506,iron ion binding|GO:0020037,heme binding	GO:0005737,cytoplasm|GO:0005739,mitochondrion|GO:0005739,mitochondrion|GO:0005741,mitochondrial outer membrane	path:hsa00100 Steroid biosynthesis - Homo sapiens (human)|path:hsa01100 Metabolic pathways - Homo sapiens (human)|path:hsa05152 Tuberculosis - Homo sapiens (human)
FBXL17	3081.42	4272.64	3533.96	2618.2	3274.7	4063.24	3472.3	4152.12	3076.69	4672.88	3406.58	3384.32	3239.72	4448.49	3918.65	4964.78	3744.65	2501.95	3108.73	3095.84	3621.82	3581.37	3601.59	-0.0160475	0.128898	-0.124498	0.900921	0.951436	Not DEG
HRH1	234.701	199.309	242.939	191.11	254.973	383.915	241.728	196.26	163.495	238.514	2189	334.136	411.672	603.093	330.316	516.919	533.001	1884.04	462.529	665.988	234.694	793.069	513.882	1.75631	0.330184	5.31919	1.04229e-07	6.18965e-06	Up	GO:0006954,inflammatory response|GO:0007186,G-protein coupled receptor signaling pathway|GO:0007186,G-protein coupled receptor signaling pathway|GO:0007200,phospholipase C-activating G-protein coupled receptor signaling pathway|GO:0007613,memory|GO:0008542,visual learning|GO:0019229,regulation of vasoconstriction|GO:0032962,positive regulation of inositol trisphosphate biosynthetic process|GO:004…	GO:0004930,G-protein coupled receptor activity|GO:0004969,histamine receptor activity	GO:0005829,cytosol|GO:0005886,plasma membrane|GO:0005886,plasma membrane|GO:0005887,integral component of plasma membrane	path:hsa04020 Calcium signaling pathway - Homo sapiens (human)|path:hsa04080 Neuroactive ligand-receptor interaction - Homo sapiens (human)|path:hsa04750 Inflammatory mediator regulation of TRP channels - Homo sapiens (human)
FBXL19	806.783	669.542	576.664	1345.59	924.718	646.06	901.417	962.9	860.415	783.82	890.97	787.606	1118.45	580.881	668.339	542.47	992.133	1430.61	664.885	1165.48	847.791	884.183	865.987	0.0604598	0.189122	0.319687	0.749206	0.868842	Not DEG	GO:0000209,protein polyubiquitination|GO:0043161,proteasome-mediated ubiquitin-dependent protein catabolic process|GO:0043687,post-translational protein modification	GO:0003677,DNA binding|GO:0004842,ubiquitin-protein transferase activity|GO:0004842,ubiquitin-protein transferase activity|GO:0005515,protein binding|GO:0008270,zinc ion binding	GO:0005829,cytosol|GO:0019005,SCF ubiquitin ligase complex
FBXL18	889.907	585.849	832.212	1345.59	958.793	870.151	664.453	973.94	786.099	894.884	493.516	658.725	753.037	660.306	747.615	684.966	810.298	950.134	607.069	518.269	880.187	688.394	784.29	-0.354343	0.145182	-2.44069	0.0146593	0.0677739	Not DEG	GO:0000209,protein polyubiquitination|GO:0031146,SCF-dependent proteasomal ubiquitin-dependent protein catabolic process|GO:0043687,post-translational protein modification	GO:0004842,ubiquitin-protein transferase activity|GO:0004842,ubiquitin-protein transferase activity	GO:0005829,cytosol
FAM169B	0	0	3.36247	0	0	0	0	0	0	0	3.6023	0	0	0	0	4.91368	0	0	0	0	0.336247	0.851598	0.593923	1.11138	2.99939	0.370535	0.710984	NA	Not DEG
GHDC	1152.97	987.056	1430.73	803.529	719.095	706.945	728.755	1008.29	777.842	1363.72	889.769	783.787	1432.06	884.447	802.668	882.496	1105.78	642.802	851.676	768.64	967.893	904.413	936.153	-0.0979012	0.1669	-0.586585	0.557483	0.742081	Not DEG	GO:0008150,biological_process|GO:0043312,neutrophil degranulation	GO:0003674,molecular_function	GO:0005576,extracellular region|GO:0005635,nuclear envelope|GO:0005783,endoplasmic reticulum|GO:0016020,membrane|GO:0034774,secretory granule lumen|GO:0035580,specific granule lumen
SDK1	1298.68	782.57	1239.91	1022.44	1418.22	624.919	629.921	759.28	1630	382.351	2067.72	1752.78	1219.29	936.275	1471.01	738.034	2033.13	9052.25	3153.2	2652.68	978.828	2507.64	1743.23	1.3571	0.371875	3.64933	0.000262922	0.00357409	Up	GO:0007156,homophilic cell adhesion via plasma membrane adhesion molecules|GO:0007416,synapse assembly|GO:0010842,retina layer formation|GO:0045216,cell-cell junction organization|GO:0048148,behavioral response to cocaine|GO:0060998,regulation of dendritic spine development	GO:0042802,identical protein binding	GO:0005886,plasma membrane|GO:0016021,integral component of membrane|GO:0030054,cell junction|GO:0045202,synapse|GO:0070062,extracellular exosome
SDK2	2180.76	286.453	1120.54	2983.05	1276.04	1889.98	1523	987.432	1559.81	1771.56	591.979	421.011	341.364	348.663	1017.37	1737.48	813.708	817.029	1241.93	481.965	1557.86	781.25	1169.56	-0.995882	0.336937	-2.9557	0.00311965	0.0225915	Not DEG	GO:0007156,homophilic cell adhesion via plasma membrane adhesion molecules|GO:0007416,synapse assembly|GO:0010842,retina layer formation|GO:0045216,cell-cell junction organization|GO:0060219,camera-type eye photoreceptor cell differentiation		GO:0005886,plasma membrane|GO:0016021,integral component of membrane|GO:0030054,cell junction|GO:0045202,synapse
GRP	0	0	237.054	480.38	0	0	0	0	0	0	6.00384	28.6402	6.47574	130.58	0	54.0504	45.4585	19.4788	0	27.5409	71.7434	31.8229	28.2854	0.362461	1.59985	0.226559	0.820767	0.910228	Not DEG	GO:0007165,signal transduction|GO:0007186,G-protein coupled receptor signaling pathway|GO:0007218,neuropeptide signaling pathway|GO:0010469,regulation of receptor activity|GO:0035176,social behavior|GO:0036343,psychomotor behavior|GO:0043207,response to external biotic stimulus|GO:0090277,positive regulation of peptide hormone secretion|GO:1900738,positive regulation of phospholipase C-activating…	GO:0005102,receptor binding|GO:0005184,neuropeptide hormone activity	GO:0005576,extracellular region|GO:0005615,extracellular space|GO:0034774,secretory granule lumen
IFNL2	1.95584	0	0	0	8.22494	6.76502	0	0	0	0	0	0	0	0	0	1.96547	5.68232	0	0	0	1.69458	0.764779	1.22968	-1.15216	2.43827	-0.472533	0.636547	NA	Not DEG	GO:0002385,mucosal immune response|GO:0007259,JAK-STAT cascade|GO:0010469,regulation of receptor activity|GO:0045087,innate immune response|GO:0050778,positive regulation of immune response|GO:0050863,regulation of T cell activation|GO:0051607,defense response to virus|GO:0051607,defense response to virus	GO:0005102,receptor binding|GO:0005125,cytokine activity	GO:0005615,extracellular space|GO:0005622,intracellular	path:hsa04060 Cytokine-cytokine receptor interaction - Homo sapiens (human)|path:hsa04630 Jak-STAT signaling pathway - Homo sapiens (human)
TPRN	330.537	265.746	438.803	562.036	258.498	247.769	234.583	315.242	259.281	330.461	348.223	292.13	401.496	354.048	301.688	232.908	196.608	360.358	237.936	391.831	324.296	311.723	318.009	-0.0576811	0.18066	-0.31928	0.749515	0.869084	Not DEG	GO:0007605,sensory perception of sound	GO:0003674,molecular_function|GO:0005515,protein binding|GO:0019902,phosphatase binding	GO:0032420,stereocilium
THSD4	7684.49	12718.7	10789.3	12824.3	16326.5	7851.65	12256.7	6189.55	7741.26	6103.96	17561.2	10952	17004.4	19312.4	12387.9	7856.97	10535	9750.24	11365.3	17241.8	10048.6	13396.7	11722.7	0.414904	0.206133	2.01279	0.0441363	0.145453	Not DEG	GO:0006508,proteolysis|GO:0048251,elastic fiber assembly	GO:0008233,peptidase activity	GO:0001527,microfibril|GO:0005578,proteinaceous extracellular matrix|GO:0031012,extracellular matrix|GO:0070062,extracellular exosome
FAM212B	717.793	698.014	1276.06	1150.13	773.145	910.741	1132.43	1168.97	865.37	842.993	949.807	695.957	864.049	813.099	891.853	806.826	1022.82	1254.22	1071.82	537.047	953.565	890.75	922.157	-0.0982747	0.15277	-0.643284	0.52004	0.713876	Not DEG	GO:0071901,negative regulation of protein serine/threonine kinase activity	GO:0019901,protein kinase binding|GO:0030291,protein serine/threonine kinase inhibitor activity	GO:0005634,nucleus
ZNF709	1688.87	2178.6	1607.26	1444.62	1265.47	1906.89	1733.77	1697.65	1265.02	1859.87	1033.86	1599.08	911.23	954.449	1271.72	2283.88	1083.05	979.353	910.604	913.856	1664.8	1194.11	1429.45	-0.479329	0.171732	-2.79114	0.00525228	0.0329991	Not DEG	GO:0006351,transcription, DNA-templated|GO:0006355,regulation of transcription, DNA-templated	GO:0000976,transcription regulatory region sequence-specific DNA binding|GO:0046872,metal ion binding	GO:0005634,nucleus
THSD1	624.89	496.979	755.716	710.58	420.647	711.173	668.025	693.043	632.512	538.023	613.592	604.308	479.205	390.395	531.809	873.652	943.265	1016.15	699.353	501.995	625.159	665.372	645.265	0.0892682	0.172739	0.516782	0.605309	0.775658	Not DEG			GO:0005576,extracellular region|GO:0005829,cytosol|GO:0016021,integral component of membrane
CHST9	0	21.5703	12.6093	0	35.2498	30.4426	9.52621	23.3059	14.0375	11.8347	9.60614	13.3654	0	0	13.2126	20.6374	93.19	4.32863	27.7962	0	15.8576	18.2136	17.0356	0.198813	0.945129	0.210355	0.83339	0.917695	Not DEG	GO:0006790,sulfur compound metabolic process|GO:0016051,carbohydrate biosynthetic process|GO:0030166,proteoglycan biosynthetic process|GO:0030203,glycosaminoglycan metabolic process|GO:0030206,chondroitin sulfate biosynthetic process|GO:0042446,hormone biosynthetic process	GO:0001537,N-acetylgalactosamine 4-O-sulfotransferase activity|GO:0001537,N-acetylgalactosamine 4-O-sulfotransferase activity|GO:0047756,chondroitin 4-sulfotransferase activity	GO:0000139,Golgi membrane|GO:0005576,extracellular region|GO:0016021,integral component of membrane	path:hsa01100 Metabolic pathways - Homo sapiens (human)
COL4A6	280.663	190.681	121.89	446.502	178.599	238.467	272.688	306.656	138.723	283.122	36.023	77.3286	12.9515	30.2893	276.364	177.875	378.442	229.417	505.891	71.3558	245.799	179.594	212.696	-0.453347	0.479454	-0.945547	0.34438	0.561375	Not DEG	GO:0007155,cell adhesion|GO:0030198,extracellular matrix organization|GO:0030574,collagen catabolic process	GO:0005201,extracellular matrix structural constituent	GO:0005576,extracellular region|GO:0005587,collagen type IV trimer|GO:0005788,endoplasmic reticulum lumen	path:hsa04151 PI3K-Akt signaling pathway - Homo sapiens (human)|path:hsa04510 Focal adhesion - Homo sapiens (human)|path:hsa04512 ECM-receptor interaction - Homo sapiens (human)|path:hsa04933 AGE-RAGE signaling pathway in diabetic complications - Homo sapiens (human)|path:hsa04974 Protein digestion and absorption - Homo sapiens (human)|path:hsa05146 Amoebiasis - Homo sapiens (human)|path:hsa05200…
COL4A5	4071.08	3479.72	2797.58	4986.22	3287.63	3866.21	4301.08	4624.37	2496.19	3658.74	1352.06	3240.16	1204.49	1048.01	3387.94	4042.97	5960.75	3639.3	4703.12	3118.38	3756.88	3169.72	3463.3	-0.245243	0.265868	-0.922427	0.356306	0.573406	Not DEG	GO:0007528,neuromuscular junction development|GO:0030198,extracellular matrix organization|GO:0030574,collagen catabolic process|GO:0038063,collagen-activated tyrosine kinase receptor signaling pathway	GO:0005201,extracellular matrix structural constituent	GO:0005576,extracellular region|GO:0005587,collagen type IV trimer|GO:0005605,basal lamina|GO:0005788,endoplasmic reticulum lumen|GO:0031594,neuromuscular junction	path:hsa04151 PI3K-Akt signaling pathway - Homo sapiens (human)|path:hsa04510 Focal adhesion - Homo sapiens (human)|path:hsa04512 ECM-receptor interaction - Homo sapiens (human)|path:hsa04933 AGE-RAGE signaling pathway in diabetic complications - Homo sapiens (human)|path:hsa04974 Protein digestion and absorption - Homo sapiens (human)|path:hsa05146 Amoebiasis - Homo sapiens (human)|path:hsa05200…
ARID3C	0	0	5.04371	4.3434	2.34998	6.76502	0	0	0	0	0	1.90935	1.85021	0	0	1.96547	0	3.24647	3.33555	0	1.85021	1.2307	1.54046	-0.599263	1.43805	-0.416718	0.676885	NA	Not DEG	GO:0006366,transcription from RNA polymerase II promoter|GO:0045944,positive regulation of transcription from RNA polymerase II promoter	GO:0000977,RNA polymerase II regulatory region sequence-specific DNA binding|GO:0001228,transcriptional activator activity, RNA polymerase II transcription regulatory region sequence-specific DNA binding|GO:0003682,chromatin binding	GO:0005634,nucleus|GO:0005737,cytoplasm|GO:0045121,membrane raft
COL4A3	12254.3	14165.6	9352.72	13970.1	15947	12951.6	16055.2	13673.2	13480.9	8541	14218.3	13620.3	12411.2	16382.5	13528.6	13445.8	12878.4	6892.26	7828.53	21518.2	13039.2	13272.4	13155.8	0.0255983	0.174672	0.146551	0.883487	0.942792	Not DEG	GO:0006919,activation of cysteine-type endopeptidase activity involved in apoptotic process|GO:0007155,cell adhesion|GO:0007166,cell surface receptor signaling pathway|GO:0007605,sensory perception of sound|GO:0008015,blood circulation|GO:0008283,cell proliferation|GO:0008285,negative regulation of cell proliferation|GO:0010951,negative regulation of endopeptidase activity|GO:0016525,negative reg…	GO:0005178,integrin binding|GO:0005178,integrin binding|GO:0005198,structural molecule activity|GO:0005201,extracellular matrix structural constituent|GO:0005515,protein binding|GO:0008191,metalloendopeptidase inhibitor activity	GO:0005576,extracellular region|GO:0005587,collagen type IV trimer|GO:0005604,basement membrane|GO:0005783,endoplasmic reticulum|GO:0005788,endoplasmic reticulum lumen|GO:0043231,intracellular membrane-bounded organelle	path:hsa04151 PI3K-Akt signaling pathway - Homo sapiens (human)|path:hsa04510 Focal adhesion - Homo sapiens (human)|path:hsa04512 ECM-receptor interaction - Homo sapiens (human)|path:hsa04933 AGE-RAGE signaling pathway in diabetic complications - Homo sapiens (human)|path:hsa04974 Protein digestion and absorption - Homo sapiens (human)|path:hsa05146 Amoebiasis - Homo sapiens (human)|path:hsa05200…
COL4A2	15187.1	12441.7	13310.3	16004.6	17031.5	13869.1	19369.2	16886.9	10789	18365.6	28473.8	17632.8	18005.3	18757.8	13943.7	13951.9	20693.9	39686	18893.6	17203	15325.5	20724.2	18024.9	0.435393	0.176192	2.47113	0.0134687	0.0640291	Not DEG	GO:0001525,angiogenesis|GO:0006351,transcription, DNA-templated|GO:0016525,negative regulation of angiogenesis|GO:0030198,extracellular matrix organization|GO:0030198,extracellular matrix organization|GO:0030574,collagen catabolic process|GO:0035987,endodermal cell differentiation|GO:0038063,collagen-activated tyrosine kinase receptor signaling pathway|GO:0071560,cellular response to transforming…	GO:0005201,extracellular matrix structural constituent|GO:0005515,protein binding	GO:0005576,extracellular region|GO:0005587,collagen type IV trimer|GO:0005788,endoplasmic reticulum lumen|GO:0031012,extracellular matrix|GO:0031012,extracellular matrix|GO:0031012,extracellular matrix|GO:0031012,extracellular matrix|GO:0070062,extracellular exosome	path:hsa04151 PI3K-Akt signaling pathway - Homo sapiens (human)|path:hsa04510 Focal adhesion - Homo sapiens (human)|path:hsa04512 ECM-receptor interaction - Homo sapiens (human)|path:hsa04933 AGE-RAGE signaling pathway in diabetic complications - Homo sapiens (human)|path:hsa04974 Protein digestion and absorption - Homo sapiens (human)|path:hsa05146 Amoebiasis - Homo sapiens (human)|path:hsa05200…
COL4A1	14662.9	11504.7	12651.3	13268.2	20688.1	15415.8	22235.4	16754.5	12404.2	20719.8	36179.1	20554.1	26925.2	28000.1	17615.7	16527.6	31280	51722.8	26721.1	23637.6	16030.5	27916.3	21973.4	0.800312	0.19285	4.14991	3.32601e-05	0.000686109	Not DEG	GO:0001569,branching involved in blood vessel morphogenesis|GO:0007420,brain development|GO:0007528,neuromuscular junction development|GO:0030198,extracellular matrix organization|GO:0030574,collagen catabolic process|GO:0030855,epithelial cell differentiation|GO:0038063,collagen-activated tyrosine kinase receptor signaling pathway|GO:0048514,blood vessel morphogenesis|GO:0061304,retinal blood ve…	GO:0005201,extracellular matrix structural constituent|GO:0005515,protein binding|GO:0030023,extracellular matrix constituent conferring elasticity|GO:0048407,platelet-derived growth factor binding	GO:0005576,extracellular region|GO:0005576,extracellular region|GO:0005587,collagen type IV trimer|GO:0005604,basement membrane|GO:0005615,extracellular space|GO:0005788,endoplasmic reticulum lumen|GO:0031012,extracellular matrix|GO:0031012,extracellular matrix	path:hsa04151 PI3K-Akt signaling pathway - Homo sapiens (human)|path:hsa04510 Focal adhesion - Homo sapiens (human)|path:hsa04512 ECM-receptor interaction - Homo sapiens (human)|path:hsa04933 AGE-RAGE signaling pathway in diabetic complications - Homo sapiens (human)|path:hsa04974 Protein digestion and absorption - Homo sapiens (human)|path:hsa05146 Amoebiasis - Homo sapiens (human)|path:hsa05200…
OR8J3	0	0	0	0	0	0	4.7631	0	0	2.73108	0	4.77337	0	0	0	4.91368	0	0	0	0	0.749418	0.968704	0.859061	0.386179	2.94496	0.131132	0.895671	NA	Not DEG	GO:0007186,G-protein coupled receptor signaling pathway|GO:0007186,G-protein coupled receptor signaling pathway|GO:0050911,detection of chemical stimulus involved in sensory perception of smell	GO:0004930,G-protein coupled receptor activity|GO:0004984,olfactory receptor activity|GO:0005549,odorant binding	GO:0005886,plasma membrane|GO:0016021,integral component of membrane	path:hsa04740 Olfactory transduction - Homo sapiens (human)
CHST1	3005.15	1224.33	1208.81	2232.51	1285.44	1875.6	1295.56	1259.74	1840.56	2387.87	720.461	1726.05	3240.65	1010.99	1053.71	1684.41	2196.78	1411.13	2611.73	1659.96	1761.56	1731.59	1746.57	-0.0248396	0.250234	-0.0992658	0.920927	0.961662	Not DEG	GO:0005976,polysaccharide metabolic process|GO:0006012,galactose metabolic process|GO:0006790,sulfur compound metabolic process|GO:0006954,inflammatory response|GO:0018146,keratan sulfate biosynthetic process|GO:0042339,keratan sulfate metabolic process	GO:0001517,N-acetylglucosamine 6-O-sulfotransferase activity|GO:0008146,sulfotransferase activity|GO:0045130,keratan sulfotransferase activity|GO:0045130,keratan sulfotransferase activity	GO:0000139,Golgi membrane|GO:0016021,integral component of membrane|GO:0016021,integral component of membrane	path:hsa00533 Glycosaminoglycan biosynthesis - keratan sulfate - Homo sapiens (human)
CHST3	2592.46	3181.19	3449.9	3691.02	2447.51	2465.85	2924.55	4277.24	2080.85	2919.52	3694.76	2758.05	2813.25	3312.97	2502.69	2220.98	3403.71	3800.54	1951.29	2069.32	3003.01	2852.76	2927.88	-0.073935	0.153053	-0.483067	0.629048	0.791012	Not DEG	GO:0005975,carbohydrate metabolic process|GO:0006790,sulfur compound metabolic process|GO:0030206,chondroitin sulfate biosynthetic process|GO:0030206,chondroitin sulfate biosynthetic process	GO:0001517,N-acetylglucosamine 6-O-sulfotransferase activity|GO:0008146,sulfotransferase activity|GO:0008459,chondroitin 6-sulfotransferase activity|GO:0008459,chondroitin 6-sulfotransferase activity	GO:0000139,Golgi membrane|GO:0016021,integral component of membrane	path:hsa00532 Glycosaminoglycan biosynthesis - chondroitin sulfate / dermatan sulfate - Homo sapiens (human)
CHST2	1652.68	1449.52	1232.35	965.972	1525.14	1249.84	1424.17	590.006	1048.68	812.951	6258.4	2302.67	3511.7	2675.55	963.421	955.219	4982.26	3384.99	2973.08	6535.95	1195.13	3454.32	2324.73	1.53115	0.302363	5.06394	4.10681e-07	1.89767e-05	Up	GO:0005975,carbohydrate metabolic process|GO:0006044,N-acetylglucosamine metabolic process|GO:0006790,sulfur compound metabolic process|GO:0006954,inflammatory response|GO:0007275,multicellular organism development|GO:0018146,keratan sulfate biosynthetic process	GO:0001517,N-acetylglucosamine 6-O-sulfotransferase activity|GO:0001517,N-acetylglucosamine 6-O-sulfotransferase activity|GO:0008146,sulfotransferase activity	GO:0000139,Golgi membrane|GO:0005794,Golgi apparatus|GO:0005802,trans-Golgi network|GO:0016021,integral component of membrane|GO:0031228,intrinsic component of Golgi membrane	path:hsa00533 Glycosaminoglycan biosynthesis - keratan sulfate - Homo sapiens (human)
CHST5	18.5805	12.0794	84.9024	22.5857	14.0999	29.597	69.065	49.065	22.2948	35.504	0	21.9575	11.1013	24.2314	9.90948	28.4993	29.548	46.5328	14.454	53.8299	35.7774	24.0064	29.8919	-0.575936	0.49699	-1.15885	0.246519	0.456092	Not DEG	GO:0005975,carbohydrate metabolic process|GO:0006044,N-acetylglucosamine metabolic process|GO:0006477,protein sulfation|GO:0006790,sulfur compound metabolic process|GO:0018146,keratan sulfate biosynthetic process|GO:0018146,keratan sulfate biosynthetic process	GO:0001517,N-acetylglucosamine 6-O-sulfotransferase activity|GO:0001517,N-acetylglucosamine 6-O-sulfotransferase activity|GO:0008146,sulfotransferase activity	GO:0000139,Golgi membrane|GO:0005794,Golgi apparatus|GO:0016021,integral component of membrane|GO:0016021,integral component of membrane|GO:0031228,intrinsic component of Golgi membrane
CHST4	214.164	194.995	174.849	158.968	222.073	199.568	252.445	376.574	97.4366	240.335	117.675	153.702	175.77	146.062	135.43	276.149	236.384	241.321	116.744	137.704	213.141	173.694	193.417	-0.292698	0.220439	-1.32779	0.184246	0.37758	Not DEG	GO:0005975,carbohydrate metabolic process|GO:0006044,N-acetylglucosamine metabolic process|GO:0006477,protein sulfation|GO:0006790,sulfur compound metabolic process|GO:0006928,movement of cell or subcellular component|GO:0006954,inflammatory response|GO:0006955,immune response|GO:0007155,cell adhesion|GO:0007267,cell-cell signaling|GO:0016266,O-glycan processing|GO:0018146,keratan sulfate biosynt…	GO:0001517,N-acetylglucosamine 6-O-sulfotransferase activity|GO:0001517,N-acetylglucosamine 6-O-sulfotransferase activity|GO:0008146,sulfotransferase activity	GO:0000139,Golgi membrane|GO:0005802,trans-Golgi network|GO:0016021,integral component of membrane|GO:0031228,intrinsic component of Golgi membrane	path:hsa00533 Glycosaminoglycan biosynthesis - keratan sulfate - Homo sapiens (human)
CHST7	94.8582	120.794	113.483	160.706	81.0744	149.676	171.472	126.342	141.201	138.375	144.092	207.164	103.612	97.5988	116.712	188.685	476.178	179.638	282.41	294.186	129.798	209.028	169.413	0.685369	0.264138	2.59474	0.00946632	0.0498882	Not DEG	GO:0005976,polysaccharide metabolic process|GO:0006044,N-acetylglucosamine metabolic process|GO:0006790,sulfur compound metabolic process|GO:0030206,chondroitin sulfate biosynthetic process|GO:0030206,chondroitin sulfate biosynthetic process	GO:0001517,N-acetylglucosamine 6-O-sulfotransferase activity|GO:0008459,chondroitin 6-sulfotransferase activity|GO:0008459,chondroitin 6-sulfotransferase activity	GO:0000139,Golgi membrane|GO:0016021,integral component of membrane|GO:0016021,integral component of membrane	path:hsa00532 Glycosaminoglycan biosynthesis - chondroitin sulfate / dermatan sulfate - Homo sapiens (human)
ZNF878	61.6089	41.4149	64.7276	33.8785	39.9497	48.2008	52.3941	61.3312	42.9382	62.8148	39.6253	36.2776	41.6298	31.6355	66.0632	81.567	12.5011	24.8896	48.9213	36.3039	50.9259	41.9414	46.4337	-0.278743	0.26421	-1.05501	0.291422	0.505866	Not DEG	GO:0006351,transcription, DNA-templated|GO:0006355,regulation of transcription, DNA-templated	GO:0003676,nucleic acid binding|GO:0046872,metal ion binding	GO:0005634,nucleus
ITGAX	2364.61	105.263	1698.89	628.924	951.743	830.407	565.619	553.208	2606.84	444.256	1292.03	1329.86	1237.79	685.211	683.754	523.798	593.234	2919.66	3281.06	1931.62	1074.98	1447.8	1261.39	0.429395	0.443009	0.969269	0.332411	0.549253	Not DEG	GO:0007155,cell adhesion|GO:0007229,integrin-mediated signaling pathway|GO:0009887,animal organ morphogenesis|GO:0030198,extracellular matrix organization|GO:0034113,heterotypic cell-cell adhesion|GO:0043312,neutrophil degranulation|GO:0050900,leukocyte migration|GO:1903955,positive regulation of protein targeting to mitochondrion	GO:0004872,receptor activity|GO:0005515,protein binding|GO:0046872,metal ion binding	GO:0005886,plasma membrane|GO:0008305,integrin complex|GO:0009986,cell surface|GO:0009986,cell surface|GO:0016020,membrane|GO:0030667,secretory granule membrane|GO:0070821,tertiary granule membrane|GO:0101003,ficolin-1-rich granule membrane	path:hsa04610 Complement and coagulation cascades - Homo sapiens (human)|path:hsa04810 Regulation of actin cytoskeleton - Homo sapiens (human)|path:hsa05152 Tuberculosis - Homo sapiens (human)
ABHD10	2423.28	2778.25	2488.23	995.507	1744.86	2505.6	2226.75	2552.6	1918.18	2748.38	1850.38	2210.07	2088.89	2537.57	2295.7	2980.64	1661.51	2006.32	1803.42	2126.91	2238.16	2156.14	2197.15	-0.0537056	0.157627	-0.340714	0.733319	0.859233	Not DEG	GO:0019391,glucuronoside catabolic process|GO:0052695,cellular glucuronidation	GO:0004553,hydrolase activity, hydrolyzing O-glycosyl compounds|GO:0004553,hydrolase activity, hydrolyzing O-glycosyl compounds|GO:0102390,mycophenolic acid acyl-glucuronide esterase activity	GO:0005739,mitochondrion|GO:0005759,mitochondrial matrix|GO:0005829,cytosol
MLNR	23.4701	16.3934	23.5373	36.4846	37.5997	71.8784	60.7296	49.065	47.0669	70.0977	16.8107	22.9122	28.6783	26.9238	27.5263	56.9986	7.95524	4.32863	11.1185	0	43.6323	20.3252	31.9787	-1.09366	0.47669	-2.29429	0.0217739	0.0890541	Down	GO:0007186,G-protein coupled receptor signaling pathway|GO:0007586,digestion	GO:0004930,G-protein coupled receptor activity|GO:0016520,growth hormone-releasing hormone receptor activity	GO:0005886,plasma membrane|GO:0005887,integral component of plasma membrane	path:hsa04080 Neuroactive ligand-receptor interaction - Homo sapiens (human)
BCL2A1	490.916	27.61	555.649	209.352	289.048	208.87	117.887	69.9176	972.715	63.7252	195.725	205.255	258.105	133.946	223.514	114.98	62.5055	291.1	462.529	292.935	300.569	224.059	262.314	-0.424554	0.482155	-0.880534	0.37857	0.59544	Not DEG	GO:0001836,release of cytochrome c from mitochondria|GO:0007568,aging|GO:0008053,mitochondrial fusion|GO:0008630,intrinsic apoptotic signaling pathway in response to DNA damage|GO:0021987,cerebral cortex development|GO:0043065,positive regulation of apoptotic process|GO:0043066,negative regulation of apoptotic process|GO:0055085,transmembrane transport|GO:0097192,extrinsic apoptotic signaling pat…	GO:0005515,protein binding|GO:0015267,channel activity|GO:0042803,protein homodimerization activity|GO:0046982,protein heterodimerization activity|GO:0051400,BH domain binding	GO:0005741,mitochondrial outer membrane	path:hsa04064 NF-kappa B signaling pathway - Homo sapiens (human)|path:hsa04210 Apoptosis - Homo sapiens (human)|path:hsa05202 Transcriptional misregulation in cancer - Homo sapiens (human)
MTFR1	1132.43	1391.71	1423.17	1093.67	1361.82	1545.81	1657.56	1318.62	1265.02	1945.44	1141.93	1063.51	909.38	973.969	1472.11	1564.51	1278.52	1007.49	878.36	717.314	1413.52	1100.71	1257.12	-0.360808	0.142847	-2.52583	0.0115425	0.0573096	Not DEG	GO:0000266,mitochondrial fission|GO:0000266,mitochondrial fission|GO:0007005,mitochondrion organization|GO:0009060,aerobic respiration|GO:0009060,aerobic respiration		GO:0005739,mitochondrion|GO:0005739,mitochondrion|GO:0005739,mitochondrion|GO:0005829,cytosol|GO:0005886,plasma membrane
NOG	7.82335	17.2562	33.6247	17.3736	30.5498	20.2951	16.6709	9.81299	30.5522	29.1315	112.872	36.2776	11.1013	12.1157	31.9305	71.7397	27.2751	8.65726	31.1318	18.7779	21.309	36.1879	28.7485	0.757298	0.445184	1.70109	0.0889261	0.233436	Not DEG	GO:0000122,negative regulation of transcription from RNA polymerase II promoter|GO:0001501,skeletal system development|GO:0001649,osteoblast differentiation|GO:0001701,in utero embryonic development|GO:0001706,endoderm formation|GO:0001707,mesoderm formation|GO:0001837,epithelial to mesenchymal transition|GO:0001839,neural plate morphogenesis|GO:0001843,neural tube closure|GO:0003149,membranous s…	GO:0005515,protein binding|GO:0019955,cytokine binding|GO:0042803,protein homodimerization activity	GO:0005576,extracellular region|GO:0005615,extracellular space	path:hsa04350 TGF-beta signaling pathway - Homo sapiens (human)
ITGAV	17424.6	36026.7	29604.9	20359.3	41775.7	21888.2	22093.7	40643	25619.2	23043	36537	33082.3	39725.9	54431.2	43643.5	26292.1	23175.9	39250.9	24255	35625.3	27847.8	35601.9	31724.9	0.354414	0.187234	1.89289	0.0583723	0.176276	Not DEG	GO:0001525,angiogenesis|GO:0001570,vasculogenesis|GO:0002479,antigen processing and presentation of exogenous peptide antigen via MHC class I, TAP-dependent|GO:0007155,cell adhesion|GO:0007160,cell-matrix adhesion|GO:0007160,cell-matrix adhesion|GO:0007160,cell-matrix adhesion|GO:0007204,positive regulation of cytosolic calcium ion concentration|GO:0007229,integrin-mediated signaling pathway|GO:0…	GO:0001618,virus receptor activity|GO:0001846,opsonin binding|GO:0001968,fibronectin binding|GO:0002020,protease binding|GO:0005080,protein kinase C binding|GO:0005102,receptor binding|GO:0005245,voltage-gated calcium channel activity|GO:0005515,protein binding|GO:0015026,coreceptor activity|GO:0017134,fibroblast growth factor binding|GO:0019960,C-X3-C chemokine binding|GO:0031994,insulin-like gr…	GO:0005829,cytosol|GO:0005886,plasma membrane|GO:0005886,plasma membrane|GO:0005887,integral component of plasma membrane|GO:0005925,focal adhesion|GO:0008305,integrin complex|GO:0008305,integrin complex|GO:0009897,external side of plasma membrane|GO:0009986,cell surface|GO:0009986,cell surface|GO:0016020,membrane|GO:0031258,lamellipodium membrane|GO:0031527,filopodium membrane|GO:0031528,microvi…	path:hsa04145 Phagosome - Homo sapiens (human)|path:hsa04151 PI3K-Akt signaling pathway - Homo sapiens (human)|path:hsa04510 Focal adhesion - Homo sapiens (human)|path:hsa04512 ECM-receptor interaction - Homo sapiens (human)|path:hsa04514 Cell adhesion molecules (CAMs) - Homo sapiens (human)|path:hsa04810 Regulation of actin cytoskeleton - Homo sapiens (human)|path:hsa04919 Thyroid hormone signal…
HIBCH	2114.26	2663.5	1599.7	1951.92	1700.21	2213.01	2520.87	2021.48	1659.73	2445.23	2705.33	2571.89	1894.62	2378.72	1696.72	2506.96	2941.17	1598.35	2162.55	3372.5	2088.99	2382.88	2235.94	0.189793	0.142638	1.33059	0.183323	0.376198	Not DEG	GO:0006574,valine catabolic process|GO:0009083,branched-chain amino acid catabolic process	GO:0003860,3-hydroxyisobutyryl-CoA hydrolase activity|GO:0003860,3-hydroxyisobutyryl-CoA hydrolase activity	GO:0005759,mitochondrial matrix|GO:0070062,extracellular exosome	path:hsa00280 Valine, leucine and isoleucine degradation - Homo sapiens (human)|path:hsa00410 beta-Alanine metabolism - Homo sapiens (human)|path:hsa00640 Propanoate metabolism - Homo sapiens (human)|path:hsa01100 Metabolic pathways - Homo sapiens (human)|path:hsa01200 Carbon metabolism - Homo sapiens (human)
CAMK1	783.313	469.369	516.98	797.448	661.52	662.972	663.262	652.564	664.716	719.184	470.701	585.215	583.742	507.514	797.162	718.379	1370.57	1151.42	809.426	1286.91	659.133	828.104	743.618	0.328684	0.195523	1.68105	0.0927537	0.240496	Not DEG	GO:0006468,protein phosphorylation|GO:0006913,nucleocytoplasmic transport|GO:0007049,cell cycle|GO:0007165,signal transduction|GO:0010976,positive regulation of neuron projection development|GO:0018107,peptidyl-threonine phosphorylation|GO:0032091,negative regulation of protein binding|GO:0032880,regulation of protein localization|GO:0033138,positive regulation of peptidyl-serine phosphorylation|…	GO:0004683,calmodulin-dependent protein kinase activity|GO:0004683,calmodulin-dependent protein kinase activity|GO:0005515,protein binding|GO:0005516,calmodulin binding|GO:0005524,ATP binding	GO:0005622,intracellular|GO:0005634,nucleus|GO:0005737,cytoplasm	path:hsa04921 Oxytocin signaling pathway - Homo sapiens (human)|path:hsa04925 Aldosterone synthesis and secretion - Homo sapiens (human)
ITGAL	2356.79	330.457	3131.3	691.469	1021.07	793.199	693.032	506.596	4497.77	625.417	1268.01	996.679	994.489	765.309	1580.01	885.444	529.592	1491.21	5212.35	1046.55	1464.71	1476.96	1470.84	0.0118523	0.457273	0.0259196	0.979321	0.989717	Not DEG	GO:0002291,T cell activation via T cell receptor contact with antigen bound to MHC molecule on antigen presenting cell|GO:0006909,phagocytosis|GO:0006928,movement of cell or subcellular component|GO:0006954,inflammatory response|GO:0007155,cell adhesion|GO:0007157,heterophilic cell-cell adhesion via plasma membrane cell adhesion molecules|GO:0007159,leukocyte cell-cell adhesion|GO:0007160,cell-ma…	GO:0005515,protein binding|GO:0030369,ICAM-3 receptor activity|GO:0032403,protein complex binding|GO:0046872,metal ion binding|GO:0046982,protein heterodimerization activity|GO:0050839,cell adhesion molecule binding|GO:0050839,cell adhesion molecule binding	GO:0005886,plasma membrane|GO:0008305,integrin complex|GO:0009986,cell surface|GO:0016020,membrane|GO:0034687,integrin alphaL-beta2 complex|GO:0035579,specific granule membrane|GO:0070062,extracellular exosome	path:hsa04015 Rap1 signaling pathway - Homo sapiens (human)|path:hsa04514 Cell adhesion molecules (CAMs) - Homo sapiens (human)|path:hsa04650 Natural killer cell mediated cytotoxicity - Homo sapiens (human)|path:hsa04670 Leukocyte transendothelial migration - Homo sapiens (human)|path:hsa04810 Regulation of actin cytoskeleton - Homo sapiens (human)|path:hsa05144 Malaria - Homo sapiens (human)|pat…
ITGAM	1317.26	100.949	1039.84	507.309	657.995	560.651	402.482	240.418	1194.84	312.253	908.981	1057.78	1240.57	744.443	756.423	427.49	739.838	1997.66	1944.62	1619.9	633.4	1143.77	888.585	0.852325	0.370605	2.29982	0.0214583	0.0880485	Not DEG	GO:0001774,microglial cell activation|GO:0006911,phagocytosis, engulfment|GO:0007155,cell adhesion|GO:0007229,integrin-mediated signaling pathway|GO:0010668,ectodermal cell differentiation|GO:0030198,extracellular matrix organization|GO:0032930,positive regulation of superoxide anion generation|GO:0032930,positive regulation of superoxide anion generation|GO:0034142,toll-like receptor 4 signaling…	GO:0001851,complement component C3b binding|GO:0005515,protein binding|GO:0031072,heat shock protein binding|GO:0046872,metal ion binding|GO:0046982,protein heterodimerization activity	GO:0005615,extracellular space|GO:0005886,plasma membrane|GO:0005886,plasma membrane|GO:0008305,integrin complex|GO:0009897,external side of plasma membrane|GO:0009986,cell surface|GO:0034688,integrin alphaM-beta2 complex|GO:0035579,specific granule membrane|GO:0044853,plasma membrane raft|GO:0070062,extracellular exosome|GO:0070821,tertiary granule membrane	path:hsa04015 Rap1 signaling pathway - Homo sapiens (human)|path:hsa04145 Phagosome - Homo sapiens (human)|path:hsa04514 Cell adhesion molecules (CAMs) - Homo sapiens (human)|path:hsa04610 Complement and coagulation cascades - Homo sapiens (human)|path:hsa04640 Hematopoietic cell lineage - Homo sapiens (human)|path:hsa04670 Leukocyte transendothelial migration - Homo sapiens (human)|path:hsa04810…
HLF	8435.53	4811.04	2294.05	3679.73	3295.85	6002.27	5814.56	7425.98	5508.47	9142.75	1187.56	3343.27	305.285	1177.92	4150.97	6412.35	5218.64	2760.58	10619.3	752.366	5641.02	3592.82	4616.92	-0.650853	0.438754	-1.48341	0.137965	0.31064	Not DEG	GO:0006366,transcription from RNA polymerase II promoter|GO:0007275,multicellular organism development|GO:0035914,skeletal muscle cell differentiation|GO:0045944,positive regulation of transcription from RNA polymerase II promoter|GO:0048511,rhythmic process	GO:0000977,RNA polymerase II regulatory region sequence-specific DNA binding|GO:0001077,transcriptional activator activity, RNA polymerase II proximal promoter sequence-specific DNA binding|GO:0001228,transcriptional activator activity, RNA polymerase II transcription regulatory region sequence-specific DNA binding|GO:0001228,transcriptional activator activity, RNA polymerase II transcription reg…	GO:0005634,nucleus|GO:0005634,nucleus
NOV	1819.91	1398.62	1876.26	3751.83	1997.49	2704.32	2894.78	4031.91	3053.57	1600.41	665.225	2000.04	910.305	1167.82	2028.14	4440	1106.92	1934.9	1150.76	1601.13	2512.91	1700.52	2106.72	-0.563297	0.289272	-1.94729	0.0514995	0.161517	Not DEG	GO:0001525,angiogenesis|GO:0002062,chondrocyte differentiation|GO:0007267,cell-cell signaling|GO:0010468,regulation of gene expression|GO:0010469,regulation of receptor activity|GO:0010761,fibroblast migration|GO:0010832,negative regulation of myotube differentiation|GO:0014909,smooth muscle cell migration|GO:0030308,negative regulation of cell growth|GO:0033627,cell adhesion mediated by integrin…	GO:0005112,Notch binding|GO:0005178,integrin binding|GO:0005515,protein binding|GO:0005520,insulin-like growth factor binding|GO:0008083,growth factor activity|GO:0008201,heparin binding	GO:0005576,extracellular region|GO:0005578,proteinaceous extracellular matrix|GO:0005615,extracellular space|GO:0005737,cytoplasm|GO:0005737,cytoplasm|GO:0005921,gap junction|GO:0005921,gap junction|GO:0030424,axon|GO:0030425,dendrite|GO:0043025,neuronal cell body|GO:0043231,intracellular membrane-bounded organelle
ITGAD	48.896	0	100.874	1.73736	28.1998	3.38251	2.38155	3.67987	85.8764	4.5518	86.4553	0	11.1013	4.71167	13.2126	7.86188	6.81878	18.3967	47.8095	42.5631	27.9579	23.8931	25.9255	-0.231975	0.876768	-0.26458	0.791333	0.893503	Not DEG	GO:0006955,immune response|GO:0007229,integrin-mediated signaling pathway|GO:0030198,extracellular matrix organization|GO:0034113,heterotypic cell-cell adhesion	GO:0046872,metal ion binding	GO:0005886,plasma membrane|GO:0008305,integrin complex|GO:0009986,cell surface	path:hsa04810 Regulation of actin cytoskeleton - Homo sapiens (human)
ITGAE	282.619	163.934	407.7	184.16	250.273	252.843	231.011	199.94	426.079	250.349	230.547	232.94	342.289	295.489	192.684	233.891	236.384	274.868	362.463	331.742	264.891	273.33	269.11	0.0442111	0.183179	0.241354	0.80928	0.904607	Not DEG	GO:0007155,cell adhesion|GO:0007229,integrin-mediated signaling pathway|GO:0030198,extracellular matrix organization	GO:0046872,metal ion binding	GO:0005886,plasma membrane|GO:0008305,integrin complex|GO:0009897,external side of plasma membrane	path:hsa04810 Regulation of actin cytoskeleton - Homo sapiens (human)
LOC100287896	985.743	1020.71	671.654	575.935	526.396	870.997	1196.73	643.978	751.418	1102.45	1244	1127.47	905.679	1005.6	519.697	958.167	919.399	548.654	559.26	748.61	834.6	853.654	844.127	0.032755	0.193893	0.168934	0.865849	0.933439	Not DEG
SMAD9	12607.3	27277.8	19076.1	13468.9	8449.37	12831.6	16900.7	17957.8	11493.4	17022.8	7251.44	15516.3	3117.61	5229.28	8579.4	13087.1	2678.64	4165.22	3043.13	1939.13	15708.6	6460.72	11084.7	-1.28176	0.329848	-3.88592	0.000101942	0.00168394	Down	GO:0001657,ureteric bud development|GO:0006351,transcription, DNA-templated|GO:0006468,protein phosphorylation|GO:0007179,transforming growth factor beta receptor signaling pathway|GO:0030509,BMP signaling pathway|GO:0030509,BMP signaling pathway|GO:0030901,midbrain development|GO:0030902,hindbrain development|GO:0051216,cartilage development|GO:0060348,bone development|GO:0060395,SMAD protein si…	GO:0003677,DNA binding|GO:0003700,DNA binding transcription factor activity|GO:0005515,protein binding|GO:0030618,transforming growth factor beta receptor, pathway-specific cytoplasmic mediator activity|GO:0046872,metal ion binding	GO:0005622,intracellular|GO:0005634,nucleus|GO:0005634,nucleus|GO:0005654,nucleoplasm|GO:0005654,nucleoplasm|GO:0005667,transcription factor complex|GO:0005737,cytoplasm|GO:0005829,cytosol|GO:0005829,cytosol|GO:0071141,SMAD protein complex	path:hsa04350 TGF-beta signaling pathway - Homo sapiens (human)|path:hsa04550 Signaling pathways regulating pluripotency of stem cells - Homo sapiens (human)
TRERF1	1487.42	653.148	1080.19	1109.3	540.496	1081.56	1342	1328.43	1815.79	995.023	692.843	751.328	558.764	490.686	1006.36	1210.73	1343.3	1536.66	1753.39	1111.65	1143.34	1045.57	1094.45	-0.129295	0.245511	-0.526637	0.598446	0.771111	Not DEG	GO:0006351,transcription, DNA-templated|GO:0006357,regulation of transcription from RNA polymerase II promoter|GO:0006694,steroid biosynthetic process|GO:0006707,cholesterol catabolic process|GO:0007275,multicellular organism development|GO:0042592,homeostatic process|GO:0045893,positive regulation of transcription, DNA-templated|GO:0046885,regulation of hormone biosynthetic process	GO:0001104,RNA polymerase II transcription cofactor activity|GO:0003700,DNA binding transcription factor activity|GO:0008134,transcription factor binding|GO:0008301,DNA binding, bending|GO:0030374,ligand-dependent nuclear receptor transcription coactivator activity|GO:0044212,transcription regulatory region DNA binding|GO:0046872,metal ion binding	GO:0000118,histone deacetylase complex|GO:0005634,nucleus|GO:0005654,nucleoplasm|GO:0005667,transcription factor complex|GO:0005730,nucleolus|GO:0005829,cytosol
LRPAP1	5329.66	4650.55	4706.62	6229.31	3939.75	5870.35	4622.59	5695.22	4656.32	6063.91	6412.1	5025.4	7454.51	5638.52	3909.84	4815.4	4531.08	6463.73	5364.67	7359.67	5176.43	5697.49	5436.96	0.138307	0.125308	1.10374	0.269706	0.482398	Not DEG	GO:0002091,negative regulation of receptor internalization|GO:0010916,negative regulation of very-low-density lipoprotein particle clearance|GO:0032091,negative regulation of protein binding|GO:0045056,transcytosis|GO:0048259,regulation of receptor-mediated endocytosis|GO:0060548,negative regulation of cell death|GO:1900116,extracellular negative regulation of signal transduction|GO:1900222,negat…	GO:0001540,amyloid-beta binding|GO:0005102,receptor binding|GO:0005515,protein binding|GO:0008201,heparin binding|GO:0035473,lipase binding|GO:0048019,receptor antagonist activity|GO:0048019,receptor antagonist activity|GO:0050750,low-density lipoprotein particle receptor binding|GO:0050750,low-density lipoprotein particle receptor binding|GO:0070326,very-low-density lipoprotein particle receptor…	GO:0005576,extracellular region|GO:0005768,endosome|GO:0005783,endoplasmic reticulum|GO:0005793,endoplasmic reticulum-Golgi intermediate compartment|GO:0005794,Golgi apparatus|GO:0005796,Golgi lumen|GO:0005801,cis-Golgi network|GO:0005886,plasma membrane|GO:0009986,cell surface|GO:0031904,endosome lumen|GO:0048237,rough endoplasmic reticulum lumen
SMAD5	7867.36	8762.71	6993.94	4987.96	8150.92	8591.58	8758.16	7706.88	7032.78	7863.69	7340.29	6750.5	6157.51	8361.86	9295.09	10487.8	9472.42	6961.52	5326.87	5738.51	7671.6	7589.23	7630.42	-0.0155094	0.133853	-0.115869	0.907756	0.955104	Not DEG	GO:0000122,negative regulation of transcription from RNA polymerase II promoter|GO:0001657,ureteric bud development|GO:0001880,Mullerian duct regression|GO:0002051,osteoblast fate commitment|GO:0006351,transcription, DNA-templated|GO:0006468,protein phosphorylation|GO:0007165,signal transduction|GO:0007179,transforming growth factor beta receptor signaling pathway|GO:0007281,germ cell development…	GO:0000979,RNA polymerase II core promoter sequence-specific DNA binding|GO:0003700,DNA binding transcription factor activity|GO:0005057,signal transducer activity, downstream of receptor|GO:0005515,protein binding|GO:0017151,DEAD/H-box RNA helicase binding|GO:0030618,transforming growth factor beta receptor, pathway-specific cytoplasmic mediator activity|GO:0031625,ubiquitin protein ligase bindi…	GO:0005622,intracellular|GO:0005634,nucleus|GO:0005634,nucleus|GO:0005634,nucleus|GO:0005654,nucleoplasm|GO:0005654,nucleoplasm|GO:0005667,transcription factor complex|GO:0005737,cytoplasm|GO:0005829,cytosol|GO:0005829,cytosol|GO:0016021,integral component of membrane|GO:0043234,protein complex|GO:0071141,SMAD protein complex	path:hsa04350 TGF-beta signaling pathway - Homo sapiens (human)|path:hsa04550 Signaling pathways regulating pluripotency of stem cells - Homo sapiens (human)
SMAD6	737.351	1176.87	1337.42	1013.75	1146.79	915.815	695.413	1379.95	642.421	806.579	1109.51	680.682	839.997	1010.99	811.476	846.135	595.507	949.052	454.746	654.721	985.237	795.281	890.259	-0.308593	0.177969	-1.73397	0.0829226	0.223257	Not DEG	GO:0001657,ureteric bud development|GO:0003148,outflow tract septum morphogenesis|GO:0003183,mitral valve morphogenesis|GO:0003184,pulmonary valve morphogenesis|GO:0003281,ventricular septum development|GO:0006351,transcription, DNA-templated|GO:0006955,immune response|GO:0007179,transforming growth factor beta receptor signaling pathway|GO:0007352,zygotic specification of dorsal/ventral axis|GO:…	GO:0000978,RNA polymerase II proximal promoter sequence-specific DNA binding|GO:0003682,chromatin binding|GO:0003700,DNA binding transcription factor activity|GO:0005515,protein binding|GO:0030617,transforming growth factor beta receptor, inhibitory cytoplasmic mediator activity|GO:0030617,transforming growth factor beta receptor, inhibitory cytoplasmic mediator activity|GO:0031625,ubiquitin prot…	GO:0005634,nucleus|GO:0005667,transcription factor complex|GO:0005737,cytoplasm|GO:0005794,Golgi apparatus|GO:0005829,cytosol|GO:0005829,cytosol|GO:0016604,nuclear body|GO:0043234,protein complex	path:hsa04350 TGF-beta signaling pathway - Homo sapiens (human)
SMAD7	1860.98	2669.54	1146.6	4853.32	2394.63	2196.94	1241.98	3356.04	2182.42	1524.85	1594.62	756.102	1673.52	1625.52	1919.14	1869.16	2071.77	2361.27	1750.05	1279.4	2342.73	1690.05	2016.39	-0.471152	0.23929	-1.96896	0.0489577	0.156	Not DEG	GO:0000122,negative regulation of transcription from RNA polymerase II promoter|GO:0001657,ureteric bud development|GO:0002725,negative regulation of T cell cytokine production|GO:0006351,transcription, DNA-templated|GO:0007179,transforming growth factor beta receptor signaling pathway|GO:0010717,regulation of epithelial to mesenchymal transition|GO:0010719,negative regulation of epithelial to me…	GO:0003700,DNA binding transcription factor activity|GO:0005515,protein binding|GO:0005518,collagen binding|GO:0008013,beta-catenin binding|GO:0030617,transforming growth factor beta receptor, inhibitory cytoplasmic mediator activity|GO:0031625,ubiquitin protein ligase binding|GO:0034713,type I transforming growth factor beta receptor binding|GO:0044212,transcription regulatory region DNA binding…	GO:0001650,fibrillar center|GO:0005634,nucleus|GO:0005654,nucleoplasm|GO:0005654,nucleoplasm|GO:0005667,transcription factor complex|GO:0005737,cytoplasm|GO:0005813,centrosome|GO:0005829,cytosol|GO:0005829,cytosol|GO:0005886,plasma membrane|GO:0005913,cell-cell adherens junction|GO:0016342,catenin complex|GO:0043234,protein complex	path:hsa04350 TGF-beta signaling pathway - Homo sapiens (human)|path:hsa04390 Hippo signaling pathway - Homo sapiens (human)
GOLPH3L	4343.92	4941.32	4309.01	3631.95	3520.28	4267.04	4453.5	4392.54	3827.28	4987.86	5183.71	4156.65	3896.55	4397.33	3560.81	4450.81	3548.04	3471.56	3134.3	3778.1	4267.47	3957.79	4112.63	-0.108635	0.0953447	-1.1394	0.254538	0.465305	Not DEG	GO:0006890,retrograde vesicle-mediated transport, Golgi to ER|GO:0007030,Golgi organization|GO:0043001,Golgi to plasma membrane protein transport|GO:0048194,Golgi vesicle budding|GO:0050714,positive regulation of protein secretion	GO:0005515,protein binding|GO:0070273,phosphatidylinositol-4-phosphate binding	GO:0000139,Golgi membrane|GO:0005802,trans-Golgi network|GO:0005829,cytosol|GO:0031985,Golgi cisterna|GO:0032580,Golgi cisterna membrane|GO:0032588,trans-Golgi network membrane	path:hsa05202 Transcriptional misregulation in cancer - Homo sapiens (human)
SMAD1	2739.15	3723.89	3470.91	2870.99	3042.05	3393.5	3402.05	3392.84	3198.07	3405.66	3176.03	3476.92	2012.11	2698.44	3032.3	4125.52	3458.26	2279.02	2742.93	1961.66	3263.91	2896.32	3080.12	-0.172362	0.126454	-1.36304	0.17287	0.362296	Not DEG	GO:0000165,MAPK cascade|GO:0001657,ureteric bud development|GO:0001710,mesodermal cell fate commitment|GO:0002051,osteoblast fate commitment|GO:0006366,transcription from RNA polymerase II promoter|GO:0006954,inflammatory response|GO:0007165,signal transduction|GO:0007179,transforming growth factor beta receptor signaling pathway|GO:0007183,SMAD protein complex assembly|GO:0007276,gamete generati…	GO:0000978,RNA polymerase II proximal promoter sequence-specific DNA binding|GO:0000979,RNA polymerase II core promoter sequence-specific DNA binding|GO:0001077,transcriptional activator activity, RNA polymerase II proximal promoter sequence-specific DNA binding|GO:0003700,DNA binding transcription factor activity|GO:0005057,signal transducer activity, downstream of receptor|GO:0005515,protein bi…	GO:0005622,intracellular|GO:0005634,nucleus|GO:0005634,nucleus|GO:0005634,nucleus|GO:0005634,nucleus|GO:0005637,nuclear inner membrane|GO:0005654,nucleoplasm|GO:0005667,transcription factor complex|GO:0005737,cytoplasm|GO:0005737,cytoplasm|GO:0005829,cytosol|GO:0016021,integral component of membrane|GO:0043234,protein complex|GO:0071141,SMAD protein complex	path:hsa04350 TGF-beta signaling pathway - Homo sapiens (human)|path:hsa04390 Hippo signaling pathway - Homo sapiens (human)|path:hsa04550 Signaling pathways regulating pluripotency of stem cells - Homo sapiens (human)|path:hsa05202 Transcriptional misregulation in cancer - Homo sapiens (human)
SMAD2	17581	22352	18296.9	13743.4	12174.1	18997.9	19969.3	21431.6	15655.1	19113.9	18421	18727.8	11381.6	20200.9	21477.1	21186.8	10713.4	11544.5	11512.1	12804	17931.5	15796.9	16864.2	-0.18283	0.162614	-1.12432	0.260879	0.473451	Not DEG	GO:0000122,negative regulation of transcription from RNA polymerase II promoter|GO:0001657,ureteric bud development|GO:0001701,in utero embryonic development|GO:0001706,endoderm formation|GO:0001707,mesoderm formation|GO:0006366,transcription from RNA polymerase II promoter|GO:0007179,transforming growth factor beta receptor signaling pathway|GO:0007179,transforming growth factor beta receptor si…	GO:0000978,RNA polymerase II proximal promoter sequence-specific DNA binding|GO:0001077,transcriptional activator activity, RNA polymerase II proximal promoter sequence-specific DNA binding|GO:0003677,DNA binding|GO:0003682,chromatin binding|GO:0003690,double-stranded DNA binding|GO:0003700,DNA binding transcription factor activity|GO:0003700,DNA binding transcription factor activity|GO:0005160,t…	GO:0000790,nuclear chromatin|GO:0005634,nucleus|GO:0005654,nucleoplasm|GO:0005667,transcription factor complex|GO:0005737,cytoplasm|GO:0005829,cytosol|GO:0032444,activin responsive factor complex|GO:0043234,protein complex|GO:0071141,SMAD protein complex|GO:0071144,SMAD2-SMAD3 protein complex	path:hsa04068 FoxO signaling pathway - Homo sapiens (human)|path:hsa04110 Cell cycle - Homo sapiens (human)|path:hsa04144 Endocytosis - Homo sapiens (human)|path:hsa04350 TGF-beta signaling pathway - Homo sapiens (human)|path:hsa04371 Apelin signaling pathway - Homo sapiens (human)|path:hsa04390 Hippo signaling pathway - Homo sapiens (human)|path:hsa04520 Adherens junction - Homo sapiens (human)|…
SMAD3	16079.9	19253.6	15267.3	17086.9	18704.7	16735	14669.2	15086.3	12784.8	12612.1	16163.5	15090.5	10475	12024.2	17145.6	15375.9	10012.2	15799.5	8720.23	11865.1	15828	13267.2	14547.6	-0.25462	0.130596	-1.94968	0.0512144	0.16106	Not DEG	GO:0000122,negative regulation of transcription from RNA polymerase II promoter|GO:0000122,negative regulation of transcription from RNA polymerase II promoter|GO:0000122,negative regulation of transcription from RNA polymerase II promoter|GO:0001657,ureteric bud development|GO:0001666,response to hypoxia|GO:0001701,in utero embryonic development|GO:0001707,mesoderm formation|GO:0001756,somitogen…	GO:0000978,RNA polymerase II proximal promoter sequence-specific DNA binding|GO:0000983,transcription factor activity, RNA polymerase II core promoter sequence-specific DNA binding|GO:0000983,transcription factor activity, RNA polymerase II core promoter sequence-specific DNA binding|GO:0000987,proximal promoter sequence-specific DNA binding|GO:0000988,transcription factor activity, protein bindi…	GO:0000790,nuclear chromatin|GO:0005634,nucleus|GO:0005637,nuclear inner membrane|GO:0005654,nucleoplasm|GO:0005654,nucleoplasm|GO:0005667,transcription factor complex|GO:0005737,cytoplasm|GO:0005829,cytosol|GO:0005829,cytosol|GO:0005886,plasma membrane|GO:0043235,receptor complex|GO:0071141,SMAD protein complex|GO:0071144,SMAD2-SMAD3 protein complex	path:hsa04068 FoxO signaling pathway - Homo sapiens (human)|path:hsa04110 Cell cycle - Homo sapiens (human)|path:hsa04144 Endocytosis - Homo sapiens (human)|path:hsa04310 Wnt signaling pathway - Homo sapiens (human)|path:hsa04350 TGF-beta signaling pathway - Homo sapiens (human)|path:hsa04371 Apelin signaling pathway - Homo sapiens (human)|path:hsa04390 Hippo signaling pathway - Homo sapiens (hum…
MUS81	1063	971.526	1170.14	1495	1136.22	1121.3	959.766	1253.61	1279.06	1047.82	983.429	1053.96	1420.96	1183.3	1166.01	898.22	1011.45	1337.55	1095.17	1549.8	1149.74	1169.99	1159.87	0.0249061	0.110765	0.224856	0.822091	0.911168	Not DEG	GO:0000712,resolution of meiotic recombination intermediates|GO:0000727,double-strand break repair via break-induced replication|GO:0000737,DNA catabolic process, endonucleolytic|GO:0006281,DNA repair|GO:0007095,mitotic G2 DNA damage checkpoint|GO:0031297,replication fork processing|GO:0031573,intra-S DNA damage checkpoint|GO:0036297,interstrand cross-link repair|GO:0072429,response to intra-S DN…	GO:0003677,DNA binding|GO:0004520,endodeoxyribonuclease activity|GO:0005515,protein binding|GO:0008821,crossover junction endodeoxyribonuclease activity|GO:0046872,metal ion binding|GO:0048257,3'-flap endonuclease activity	GO:0005634,nucleus|GO:0005654,nucleoplasm|GO:0005730,nucleolus|GO:0048476,Holliday junction resolvase complex	path:hsa03440 Homologous recombination - Homo sapiens (human)|path:hsa03460 Fanconi anemia pathway - Homo sapiens (human)
AMMECR1L	2517.16	2815.35	2908.54	3643.24	3165.43	2404.12	2467.29	3533.9	2768.69	2809.37	2560.04	2708.41	2138.85	2968.35	3238.2	2480.42	2274.06	2949.96	2728.48	2459.9	2903.31	2650.67	2776.99	-0.131158	0.0970107	-1.35199	0.176378	0.366944	Not DEG
NECAP1	2750.89	2630.71	2698.38	2330.67	3067.9	2569.86	2338.68	3175.73	2675.38	2663.71	2925.07	2806.74	2994.57	3057.87	3160.02	2545.28	2558.18	2329.89	2645.09	2595.1	2690.19	2761.78	2725.99	0.0384075	0.0733058	0.523936	0.600323	0.772093	Not DEG	GO:0006897,endocytosis|GO:0015031,protein transport|GO:0061024,membrane organization		GO:0005829,cytosol|GO:0005886,plasma membrane|GO:0005905,clathrin-coated pit|GO:0030125,clathrin vesicle coat
TMPRSS11B	0	0	0	0	3.52498	2.53688	0	0	0	0	0	0	0	0	0	0	0	0	0	0	0.606186	0	0.303093	-1.67508	3.01254	-0.556037	0.578186	NA	Not DEG	GO:0006508,proteolysis|GO:0008150,biological_process	GO:0004252,serine-type endopeptidase activity|GO:0008236,serine-type peptidase activity	GO:0005886,plasma membrane|GO:0005887,integral component of plasma membrane|GO:0070062,extracellular exosome
IGF2R	25305.6	29275.2	29724.3	29136.4	27067.1	26053.8	24738.4	29210.8	24646.5	25023.1	53305.7	34999.3	57661	65988.2	25734.9	23182.7	43603.8	43148.9	51453	73669.3	27018.1	47274.7	37146.4	0.807141	0.174399	4.62813	3.68985e-06	0.000120184	Not DEG	GO:0001889,liver development|GO:0006898,receptor-mediated endocytosis|GO:0007165,signal transduction|GO:0007186,G-protein coupled receptor signaling pathway|GO:0007283,spermatogenesis|GO:0009791,post-embryonic development|GO:0031100,animal organ regeneration|GO:0032526,response to retinoic acid|GO:0043065,positive regulation of apoptotic process|GO:0043312,neutrophil degranulation|GO:0048009,insu…	GO:0001965,G-protein alpha-subunit binding|GO:0001972,retinoic acid binding|GO:0004872,receptor activity|GO:0004930,G-protein coupled receptor activity|GO:0005010,insulin-like growth factor-activated receptor activity|GO:0005215,transporter activity|GO:0005515,protein binding|GO:0005537,mannose binding|GO:0019899,enzyme binding|GO:0031995,insulin-like growth factor II binding|GO:0042802,identical…	GO:0005641,nuclear envelope lumen|GO:0005765,lysosomal membrane|GO:0005768,endosome|GO:0005769,early endosome|GO:0005770,late endosome|GO:0005794,Golgi apparatus|GO:0005802,trans-Golgi network|GO:0005886,plasma membrane|GO:0005887,integral component of plasma membrane|GO:0005925,focal adhesion|GO:0009986,cell surface|GO:0016020,membrane|GO:0030118,clathrin coat|GO:0030133,transport vesicle|GO:003…	path:hsa04142 Lysosome - Homo sapiens (human)|path:hsa04144 Endocytosis - Homo sapiens (human)
TMPRSS11D	295.332	182.916	179.892	184.16	336.048	464.25	316.746	289.483	130.466	208.472	563.16	168.023	236.827	482.609	204.796	505.126	352.304	251.061	216.81	300.446	258.777	328.116	293.446	0.343501	0.260324	1.31952	0.186997	0.380941	Not DEG	GO:0006508,proteolysis|GO:0007585,respiratory gaseous exchange	GO:0004252,serine-type endopeptidase activity|GO:0008233,peptidase activity	GO:0005576,extracellular region|GO:0005887,integral component of plasma membrane|GO:0070062,extracellular exosome
TMPRSS11E	0	0	0	0	0	0	0	0	0	3.64144	168.107	579.487	494.007	301.547	22.0211	0	0	56.2722	45.5858	696.032	0.364144	236.306	118.335	9.23036	1.47828	6.24397	4.26592e-10	6.10909e-08	Up	GO:0006508,proteolysis|GO:0050890,cognition	GO:0004252,serine-type endopeptidase activity|GO:0008236,serine-type peptidase activity	GO:0005576,extracellular region|GO:0005887,integral component of plasma membrane
TMPRSS11F	6.84544	0	6.72494	10.4242	0	16.0669	0	17.1727	0	5.46216	68.4438	7.63739	61.9821	43.7512	0	29.4821	18.1834	21.6432	0	47.5706	6.26964	29.8694	18.0695	2.25249	0.934085	2.41144	0.0158898	0.0715536	Up	GO:0006508,proteolysis	GO:0004252,serine-type endopeptidase activity	GO:0005576,extracellular region|GO:0005887,integral component of plasma membrane
HS3ST2	60.631	10.3537	17.653	39.0906	4.69997	46.5095	14.2893	82.1838	55.3242	99.2292	21.6138	15.2748	52.7311	20.1929	23.1221	47.1713	0	281.361	62.2635	35.052	42.9964	55.8782	49.4373	0.377435	0.655784	0.575547	0.564922	0.74822	Not DEG	GO:0006024,glycosaminoglycan biosynthetic process|GO:0007623,circadian rhythm	GO:0008146,sulfotransferase activity|GO:0008467,[heparan sulfate]-glucosamine 3-sulfotransferase 1 activity|GO:0033871,[heparan sulfate]-glucosamine 3-sulfotransferase 2 activity	GO:0000139,Golgi membrane|GO:0016021,integral component of membrane	path:hsa00534 Glycosaminoglycan biosynthesis - heparan sulfate / heparin - Homo sapiens (human)
HRH2	72.366	37.1009	99.1929	118.141	43.4747	52.4289	115.505	57.6513	202.305	47.3387	48.0307	80.1926	10.1762	59.9055	99.0948	99.2563	76.1431	235.91	304.646	102.652	84.5504	111.601	98.0756	0.398659	0.435876	0.914616	0.360393	0.577964	Not DEG	GO:0001697,histamine-induced gastric acid secretion|GO:0001698,gastrin-induced gastric acid secretion|GO:0003382,epithelial cell morphogenesis|GO:0006955,immune response|GO:0007186,G-protein coupled receptor signaling pathway|GO:0007187,G-protein coupled receptor signaling pathway, coupled to cyclic nucleotide second messenger|GO:0007613,memory|GO:0008542,visual learning|GO:0045907,positive regul…	GO:0004969,histamine receptor activity	GO:0005886,plasma membrane|GO:0005887,integral component of plasma membrane	path:hsa04020 Calcium signaling pathway - Homo sapiens (human)|path:hsa04080 Neuroactive ligand-receptor interaction - Homo sapiens (human)|path:hsa04971 Gastric acid secretion - Homo sapiens (human)
RAD21L1	0	6.90249	0	0	0	9.30191	0	0	4.95441	0	0	6.68272	0	1.34619	0	26.5339	0	0	0	0	2.11588	3.45628	2.78608	0.703147	2.1271	0.330567	0.740972	NA	Not DEG	GO:0000724,double-strand break repair via homologous recombination|GO:0006302,double-strand break repair|GO:0007062,sister chromatid cohesion|GO:0007130,synaptonemal complex assembly|GO:0007283,spermatogenesis|GO:0009566,fertilization|GO:0070197,meiotic attachment of telomere to nuclear envelope|GO:0072520,seminiferous tubule development	GO:0003682,chromatin binding	GO:0000798,nuclear cohesin complex|GO:0000800,lateral element|GO:0005634,nucleus|GO:0005694,chromosome|GO:0030893,meiotic cohesin complex|GO:0034991,nuclear meiotic cohesin complex
PLRG1	4212.88	5701.46	4920.98	3307.07	4422.67	4628.97	4165.33	4677.12	4558.05	4674.7	7097.74	5313.71	10744.2	8901.01	5596.65	4874.37	3103.68	4486.63	4192.78	7045.45	4526.92	6135.62	5331.27	0.438742	0.182914	2.39862	0.016457	0.0732887	Not DEG	GO:0000398,mRNA splicing, via spliceosome|GO:0000398,mRNA splicing, via spliceosome|GO:0000398,mRNA splicing, via spliceosome|GO:0034504,protein localization to nucleus|GO:1900087,positive regulation of G1/S transition of mitotic cell cycle	GO:0005515,protein binding	GO:0000974,Prp19 complex|GO:0001650,fibrillar center|GO:0005654,nucleoplasm|GO:0005662,DNA replication factor A complex|GO:0016607,nuclear speck|GO:0031965,nuclear membrane|GO:0071011,precatalytic spliceosome|GO:0071013,catalytic step 2 spliceosome|GO:0080008,Cul4-RING E3 ubiquitin ligase complex	path:hsa03040 Spliceosome - Homo sapiens (human)
SLC36A3	3.91168	11.2165	20.1748	3.47472	10.5749	3.38251	0	0	10.7345	2.73108	10.8069	6.68272	3.70043	6.73095	0	18.672	4.54585	6.49295	10.0066	0	6.62008	6.76384	6.69196	0.0240328	0.740819	0.0324409	0.97412	0.987513	Not DEG	GO:0015808,L-alanine transport|GO:0015816,glycine transport|GO:0035524,proline transmembrane transport|GO:1902600,hydrogen ion transmembrane transport	GO:0005280,hydrogen:amino acid symporter activity|GO:0015078,hydrogen ion transmembrane transporter activity|GO:0015180,L-alanine transmembrane transporter activity|GO:0015187,glycine transmembrane transporter activity|GO:0015193,L-proline transmembrane transporter activity	GO:0005774,vacuolar membrane|GO:0016021,integral component of membrane
CKS1B	398.991	443.485	481.674	492.542	387.747	558.96	419.153	518.862	495.441	453.359	333.813	427.694	556.914	619.248	394.177	431.421	455.722	344.126	442.516	393.083	465.021	439.871	452.446	-0.0783221	0.116606	-0.671679	0.501788	0.699657	Not DEG	GO:0007049,cell cycle|GO:0007346,regulation of mitotic cell cycle|GO:0045737,positive regulation of cyclin-dependent protein serine/threonine kinase activity|GO:0045893,positive regulation of transcription, DNA-templated|GO:0051301,cell division	GO:0005515,protein binding|GO:0019901,protein kinase binding|GO:0042393,histone binding|GO:0043130,ubiquitin binding|GO:0061575,cyclin-dependent protein serine/threonine kinase activator activity	GO:0000307,cyclin-dependent protein kinase holoenzyme complex|GO:0005654,nucleoplasm|GO:0019005,SCF ubiquitin ligase complex	path:hsa05200 Pathways in cancer - Homo sapiens (human)|path:hsa05222 Small cell lung cancer - Homo sapiens (human)
SLC36A1	1335.84	892.147	968.392	1256.98	1405.29	1096.78	976.436	1007.06	1624.22	701.888	1575.41	1201.93	1570.83	1546.77	1366.41	1252	5813.01	2372.09	3840.32	1409.59	1126.5	2194.84	1660.67	0.962153	0.274526	3.50479	0.000456975	0.00547991	Not DEG	GO:0006811,ion transport|GO:0006865,amino acid transport|GO:0015808,L-alanine transport|GO:0015816,glycine transport|GO:0035524,proline transmembrane transport|GO:1902600,hydrogen ion transmembrane transport	GO:0005280,hydrogen:amino acid symporter activity|GO:0015078,hydrogen ion transmembrane transporter activity|GO:0015171,amino acid transmembrane transporter activity|GO:0015180,L-alanine transmembrane transporter activity|GO:0015187,glycine transmembrane transporter activity|GO:0015193,L-proline transmembrane transporter activity	GO:0005765,lysosomal membrane|GO:0005783,endoplasmic reticulum|GO:0005886,plasma membrane|GO:0016021,integral component of membrane	path:hsa04974 Protein digestion and absorption - Homo sapiens (human)
HYI	659.118	645.383	670.813	810.479	441.797	548.812	647.782	517.635	653.982	558.961	507.925	594.762	901.979	632.709	440.421	493.333	736.428	702.32	671.556	967.685	615.476	664.912	640.194	0.110689	0.147814	0.748837	0.453955	0.662412	Not DEG	GO:0008150,biological_process	GO:0003674,molecular_function|GO:0005515,protein binding|GO:0008903,hydroxypyruvate isomerase activity	GO:0005575,cellular_component	path:hsa00630 Glyoxylate and dicarboxylate metabolism - Homo sapiens (human)|path:hsa01100 Metabolic pathways - Homo sapiens (human)
MROH2A	69.4323	11.2165	2.52185	2.60604	219.723	487.927	0	0	37.158	93.7671	0	35.3229	0	2.01929	395.278	280.08	3.40939	0	0	3.75557	92.4353	71.9865	82.2109	-0.360823	1.50771	-0.239318	0.810859	0.90511	Not DEG
ERICH6	56.7193	31.924	21.0155	35.6159	17.6249	28.7513	48.8218	29.439	40.461	24.5797	28.8184	48.6884	32.3787	17.5005	26.4253	38.3267	19.3199	18.3967	23.3488	33.8001	33.4952	28.7003	31.0978	-0.223042	0.26439	-0.843609	0.398888	0.612238	Not DEG
ERICH5	50.8518	71.6134	54.6402	31.2725	169.199	37.2076	57.1573	49.065	46.2411	33.6833	208.934	67.7818	14.8017	35.0009	56.1537	45.2058	128.42	292.183	51.145	22.5334	60.0931	92.2159	76.1545	0.618415	0.471074	1.31278	0.189258	0.383877	Not DEG
ERICH4	24.448	19.8447	20.1748	45.1714	18.7999	27.0601	41.6772	24.5325	20.6434	34.5937	4.80307	19.0935	0	0	0	27.5166	29.548	36.7934	24.4607	7.51114	27.6945	14.9726	21.3336	-0.890247	0.655803	-1.35749	0.174625	0.36474	Not DEG
ERICH3	44.9843	6.90249	75.6556	75.5752	25.8498	6.76502	23.8155	34.3455	84.2249	41.8766	123.679	64.9178	25.903	45.7705	35.2337	43.2403	22.7293	34.629	123.415	68.8521	41.9995	58.837	50.4182	0.482071	0.447263	1.07782	0.281112	0.495283	Not DEG
ERICH2	100.726	95.7721	67.2494	69.4944	56.3996	43.127	27.3879	42.9318	94.1337	92.8567	82.853	111.697	649.425	665.018	70.4674	93.3598	54.5502	24.8896	37.8028	46.3187	69.0078	183.638	126.323	1.41293	0.532799	2.65191	0.00800388	0.0444381	Up		GO:0005515,protein binding
ERICH1	1821.86	1621.22	1146.6	1701.74	1860.01	1558.49	2211.27	1619.14	2155.99	1696	2441.16	2214.84	1613.39	1335.42	1376.32	1245.13	2037.68	2079.91	2935.28	3025.74	1739.23	2030.49	1884.86	0.223163	0.171588	1.30057	0.193405	0.389067	Not DEG
ARTN	23.4701	18.119	10.928	5.21208	7.04995	12.6844	26.1971	26.9857	25.5978	19.1176	0	28.6402	25.903	19.5198	11.0105	11.7928	51.1409	56.2722	28.9081	28.7927	17.5362	26.198	21.8671	0.581219	0.47391	1.22643	0.220035	0.423326	Not DEG	GO:0000165,MAPK cascade|GO:0007165,signal transduction|GO:0007405,neuroblast proliferation|GO:0007411,axon guidance|GO:0007422,peripheral nervous system development|GO:0010469,regulation of receptor activity|GO:0050930,induction of positive chemotaxis|GO:0061146,Peyer's patch morphogenesis|GO:0097021,lymphocyte migration into lymphoid organs	GO:0005088,Ras guanyl-nucleotide exchange factor activity|GO:0005102,receptor binding|GO:0005515,protein binding|GO:0008083,growth factor activity	GO:0005576,extracellular region|GO:0005615,extracellular space|GO:0005622,intracellular
ART1	34.2272	9.49093	15.9717	26.9291	7.04995	27.0601	59.5388	53.9715	23.9463	31.8626	44.4284	18.1388	0	16.1543	40.739	35.3785	31.821	36.7934	18.9014	21.2816	29.0048	26.3636	27.6842	-0.137364	0.472562	-0.290679	0.771297	0.881985	Not DEG	GO:0006471,protein ADP-ribosylation	GO:0003950,NAD+ ADP-ribosyltransferase activity|GO:0003956,NAD(P)+-protein-arginine ADP-ribosyltransferase activity	GO:0005886,plasma membrane|GO:0005887,integral component of plasma membrane|GO:0009986,cell surface|GO:0031225,anchored component of membrane|GO:0033017,sarcoplasmic reticulum membrane
HRH3	0	3.45125	4.20309	0	0	0	0	2.45325	0	0	0	0	4.62553	2.69238	0	15.7238	0	0	0	0	1.01076	2.30417	1.65746	1.19122	2.08774	0.570577	0.568286	NA	Not DEG	GO:0007186,G-protein coupled receptor signaling pathway|GO:0007187,G-protein coupled receptor signaling pathway, coupled to cyclic nucleotide second messenger|GO:0007194,negative regulation of adenylate cyclase activity|GO:0007269,neurotransmitter secretion|GO:0014050,negative regulation of glutamate secretion|GO:0014061,regulation of norepinephrine secretion|GO:0014063,negative regulation of ser…	GO:0004969,histamine receptor activity	GO:0005886,plasma membrane|GO:0005887,integral component of plasma membrane|GO:0098793,presynapse	path:hsa04080 Neuroactive ligand-receptor interaction - Homo sapiens (human)
ART3	0	18.119	15.9717	9.55548	21.1499	10.1475	32.151	28.2124	14.0375	12.745	887.367	23.8668	0	13.4619	26.4253	7.86188	27.2751	3.24647	14.454	10.0149	16.2089	101.397	15.2153	-0.184257	0.565568	-0.325791	0.744582	0.866089	Not DEG	GO:0006471,protein ADP-ribosylation|GO:0006501,C-terminal protein lipidation	GO:0003950,NAD+ ADP-ribosyltransferase activity|GO:0003956,NAD(P)+-protein-arginine ADP-ribosyltransferase activity	GO:0005576,extracellular region|GO:0005886,plasma membrane|GO:0005887,integral component of plasma membrane|GO:0031225,anchored component of membrane|GO:0070062,extracellular exosome
ART5	74.3219	92.3208	21.0155	85.9993	18.7999	24.5232	90.499	22.0792	22.2948	171.148	6.00384	60.1444	0	6.05786	49.5474	70.7569	23.8657	31.3826	98.9545	12.5186	62.3001	35.9232	49.1117	-0.795342	0.620304	-1.28218	0.199779	0.397951	Not DEG	GO:0006471,protein ADP-ribosylation	GO:0003950,NAD+ ADP-ribosyltransferase activity|GO:0003953,NAD+ nucleosidase activity|GO:0003956,NAD(P)+-protein-arginine ADP-ribosyltransferase activity	GO:0005576,extracellular region|GO:0016020,membrane
ART4	774.512	709.231	724.613	1284.78	1291.32	1807.11	1568.25	2698.57	2045.34	1579.47	371.037	1213.39	116.563	335.201	1594.32	2779.18	389.807	806.207	1264.17	620.921	1448.32	949.08	1198.7	-0.609729	0.407941	-1.49465	0.135006	0.306241	Not DEG	GO:0006471,protein ADP-ribosylation|GO:0006501,C-terminal protein lipidation|GO:0006525,arginine metabolic process	GO:0003956,NAD(P)+-protein-arginine ADP-ribosyltransferase activity	GO:0005576,extracellular region|GO:0005886,plasma membrane|GO:0016020,membrane|GO:0031225,anchored component of membrane
HAUS7	374.543	400.345	458.137	621.106	471.172	394.908	521.56	521.315	430.208	553.499	170.509	347.501	321.012	334.528	462.442	452.058	325.029	523.764	324.66	391.831	474.679	365.333	420.006	-0.377338	0.160648	-2.34884	0.0188319	0.0806654	Not DEG	GO:0000086,G2/M transition of mitotic cell cycle|GO:0007098,centrosome cycle|GO:0010389,regulation of G2/M transition of mitotic cell cycle|GO:0051225,spindle assembly|GO:0051301,cell division|GO:0097711,ciliary basal body-plasma membrane docking	GO:0005515,protein binding|GO:0031996,thioesterase binding|GO:0031996,thioesterase binding	GO:0005813,centrosome|GO:0005819,spindle|GO:0005829,cytosol|GO:0005874,microtubule|GO:0070652,HAUS complex
ADRM1	1067.89	1009.49	1468.56	1465.46	1575.66	947.949	712.084	1110.09	1315.39	1046.91	1310.04	978.54	1669.82	1273.5	1325.67	826.48	922.808	1520.43	1494.32	1715.04	1171.95	1303.66	1237.81	0.153412	0.162935	0.941552	0.346422	0.563127	Not DEG	GO:0006368,transcription elongation from RNA polymerase II promoter|GO:0006511,ubiquitin-dependent protein catabolic process|GO:0010950,positive regulation of endopeptidase activity|GO:0016579,protein deubiquitination|GO:0043248,proteasome assembly	GO:0002020,protease binding|GO:0005515,protein binding|GO:0043130,ubiquitin binding|GO:0061133,endopeptidase activator activity|GO:0070628,proteasome binding	GO:0000502,proteasome complex|GO:0005654,nucleoplasm|GO:0005829,cytosol|GO:0005829,cytosol|GO:0005886,plasma membrane|GO:0005887,integral component of plasma membrane|GO:0008541,proteasome regulatory particle, lid subcomplex|GO:0016020,membrane	path:hsa03050 Proteasome - Homo sapiens (human)|path:hsa05169 Epstein-Barr virus infection - Homo sapiens (human)
TCEA2	906.531	914.58	978.479	1256.98	575.746	799.118	958.575	816.932	774.539	905.808	497.118	836.294	900.129	757.905	691.461	765.551	835.301	760.757	621.523	901.337	888.729	756.738	822.733	-0.232109	0.130089	-1.78422	0.0743871	0.207565	Not DEG	GO:0006354,DNA-templated transcription, elongation|GO:0032784,regulation of DNA-templated transcription, elongation|GO:0045944,positive regulation of transcription from RNA polymerase II promoter	GO:0003677,DNA binding|GO:0005515,protein binding|GO:0008270,zinc ion binding	GO:0008023,transcription elongation factor complex
TCEA3	2790.98	3691.11	2261.26	3711	2483.93	2816.79	3148.41	1614.24	2183.24	2705.59	6709.89	3652.58	3978.88	3155.47	2077.69	2561.01	2832.07	1986.84	3029.79	4355.21	2740.66	3433.94	3087.3	0.325216	0.20388	1.59513	0.110682	0.269823	Not DEG	GO:0006351,transcription, DNA-templated|GO:0006355,regulation of transcription, DNA-templated	GO:0003677,DNA binding|GO:0008270,zinc ion binding	GO:0005634,nucleus
TCEA1	8506.92	7326.99	6840.95	7807.7	8058.09	7155.7	8847.47	8644.02	7226.83	7089.88	5367.43	8090.86	13006.1	13627.5	6855.16	6730.75	5502.76	4512.6	6130.73	5285.34	7750.46	7510.92	7630.69	-0.0451369	0.185281	-0.243613	0.80753	0.90335	Not DEG	GO:0006283,transcription-coupled nucleotide-excision repair|GO:0006355,regulation of transcription, DNA-templated|GO:0006366,transcription from RNA polymerase II promoter|GO:0006368,transcription elongation from RNA polymerase II promoter	GO:0003677,DNA binding|GO:0005515,protein binding|GO:0008270,zinc ion binding	GO:0005634,nucleus|GO:0005654,nucleoplasm|GO:0005669,transcription factor TFIID complex|GO:0005730,nucleolus
COX4I2	55.7414	28.4728	30.2622	39.9593	51.6996	58.3483	80.9728	30.6656	56.9757	76.4702	61.2392	74.4645	75.8587	51.1552	62.76	67.8087	140.921	84.4083	83.3886	58.8373	50.9568	76.0842	63.5205	0.578184	0.2381	2.42832	0.015169	0.0693505	Not DEG	GO:0006091,generation of precursor metabolites and energy|GO:0006123,mitochondrial electron transport, cytochrome c to oxygen|GO:0045333,cellular respiration|GO:0055114,oxidation-reduction process|GO:0071456,cellular response to hypoxia|GO:1902600,hydrogen ion transmembrane transport	GO:0004129,cytochrome-c oxidase activity	GO:0005751,mitochondrial respiratory chain complex IV|GO:0005751,mitochondrial respiratory chain complex IV	path:hsa00190 Oxidative phosphorylation - Homo sapiens (human)|path:hsa01100 Metabolic pathways - Homo sapiens (human)|path:hsa04260 Cardiac muscle contraction - Homo sapiens (human)|path:hsa04932 Non-alcoholic fatty liver disease (NAFLD) - Homo sapiens (human)|path:hsa05010 Alzheimer's disease - Homo sapiens (human)|path:hsa05012 Parkinson's disease - Homo sapiens (human)|path:hsa05016 Huntingto…
COX4I1	2870.19	3685.93	3376.76	4365.12	4434.42	3619.29	3680.69	5130.97	3582.04	4709.29	3645.53	3439.69	4268.44	4113.28	4370.08	3363.9	2944.58	3632.8	4212.79	4220.01	3945.47	3821.11	3883.29	-0.0460302	0.107544	-0.428013	0.668641	0.817601	Not DEG	GO:0006091,generation of precursor metabolites and energy|GO:0006123,mitochondrial electron transport, cytochrome c to oxygen|GO:0006123,mitochondrial electron transport, cytochrome c to oxygen|GO:0007584,response to nutrient|GO:1902600,hydrogen ion transmembrane transport	GO:0004129,cytochrome-c oxidase activity|GO:0005515,protein binding	GO:0005634,nucleus|GO:0005739,mitochondrion|GO:0005743,mitochondrial inner membrane|GO:0005751,mitochondrial respiratory chain complex IV|GO:0016020,membrane|GO:0070062,extracellular exosome	path:hsa00190 Oxidative phosphorylation - Homo sapiens (human)|path:hsa01100 Metabolic pathways - Homo sapiens (human)|path:hsa04260 Cardiac muscle contraction - Homo sapiens (human)|path:hsa04932 Non-alcoholic fatty liver disease (NAFLD) - Homo sapiens (human)|path:hsa05010 Alzheimer's disease - Homo sapiens (human)|path:hsa05012 Parkinson's disease - Homo sapiens (human)|path:hsa05016 Huntingto…
BFAR	2252.15	2483.17	2414.25	2784.99	2085.61	1977.92	2141.02	2071.77	2402.06	1873.52	3297.31	2600.53	2585.67	3545.19	2033.64	1848.52	2407.03	2802.79	3465.63	2707.77	2248.65	2729.41	2489.03	0.279478	0.119909	2.33075	0.0197665	0.0831947	Not DEG	GO:0000209,protein polyubiquitination|GO:0006915,apoptotic process|GO:0042787,protein ubiquitination involved in ubiquitin-dependent protein catabolic process|GO:0043066,negative regulation of apoptotic process|GO:0043161,proteasome-mediated ubiquitin-dependent protein catabolic process|GO:0051865,protein autoubiquitination|GO:0070534,protein K63-linked ubiquitination|GO:0070936,protein K48-linke…	GO:0005515,protein binding|GO:0030674,protein binding, bridging|GO:0046872,metal ion binding|GO:0061630,ubiquitin protein ligase activity|GO:0089720,caspase binding	GO:0005783,endoplasmic reticulum|GO:0005887,integral component of plasma membrane|GO:0016020,membrane|GO:0030176,integral component of endoplasmic reticulum membrane
MROH2B	3.91168	0	0	7.81812	0	1.69126	10.717	6.13312	0	6.37252	0	3.81869	0	0	4.40421	6.87915	3.40939	18.3967	0	23.7853	3.66437	6.06934	4.86685	0.729249	1.16762	0.624562	0.532258	0.723087	Not DEG	GO:0007283,spermatogenesis|GO:0010737,protein kinase A signaling|GO:0030154,cell differentiation		GO:0001669,acrosomal vesicle|GO:0005737,cytoplasm|GO:0036126,sperm flagellum|GO:0097225,sperm midpiece
ZC3H18	4382.06	3667.81	2860.62	5954.8	4679.99	3556.71	3525.89	3080.05	4685.22	3750.68	5256.96	3595.3	4931.74	4248.58	3580.62	2717.26	3615.09	4055.93	4859.89	4770.83	4014.38	4163.22	4088.8	0.05243	0.142191	0.36873	0.712329	0.846711	Not DEG		GO:0003723,RNA binding|GO:0005515,protein binding|GO:0046872,metal ion binding	GO:0016607,nuclear speck|GO:0043234,protein complex
TMEM212	0	0	0	0	0	4.22814	0	0	0	1.82072	0	0	0	0	5.50526	1.96547	0	6.49295	4.44739	0	0.604886	1.84111	1.223	1.57935	2.06157	0.766088	0.443624	NA	Not DEG			GO:0016021,integral component of membrane
CRTAM	214.164	14.6678	208.473	67.7571	45.8247	42.2814	9.52621	26.9857	420.299	60.9941	84.0537	131.745	46.2553	39.7126	75.9726	106.135	43.1856	48.6971	368.022	85.1263	111.097	102.891	106.994	-0.112517	0.573545	-0.196179	0.84447	0.923042	Not DEG	GO:0001913,T cell mediated cytotoxicity|GO:0002355,detection of tumor cell|GO:0002860,positive regulation of natural killer cell mediated cytotoxicity directed against tumor cell target|GO:0007156,homophilic cell adhesion via plasma membrane adhesion molecules|GO:0007157,heterophilic cell-cell adhesion via plasma membrane cell adhesion molecules|GO:0008037,cell recognition|GO:0045954,positive reg…	GO:0004872,receptor activity|GO:0005102,receptor binding|GO:0042803,protein homodimerization activity|GO:0050839,cell adhesion molecule binding	GO:0005886,plasma membrane|GO:0005886,plasma membrane|GO:0005887,integral component of plasma membrane|GO:0005913,cell-cell adherens junction
EDA	1003.35	924.934	691.829	1072.82	554.596	834.635	1221.74	745.788	663.065	1357.35	294.188	804.79	73.0834	135.965	548.324	793.067	1808.11	420.959	2160.32	996.478	907.009	803.529	855.269	-0.175014	0.418099	-0.418593	0.675513	0.822232	Not DEG	GO:0006955,immune response|GO:0007160,cell-matrix adhesion|GO:0010467,gene expression|GO:0010628,positive regulation of gene expression|GO:0030154,cell differentiation|GO:0033209,tumor necrosis factor-mediated signaling pathway|GO:0042346,positive regulation of NF-kappaB import into nucleus|GO:0042475,odontogenesis of dentin-containing tooth|GO:0043473,pigmentation|GO:0051092,positive regulation …	GO:0005102,receptor binding|GO:0005164,tumor necrosis factor receptor binding|GO:0005515,protein binding	GO:0005576,extracellular region|GO:0005581,collagen trimer|GO:0005789,endoplasmic reticulum membrane|GO:0005856,cytoskeleton|GO:0005886,plasma membrane|GO:0005887,integral component of plasma membrane|GO:0016020,membrane|GO:0016021,integral component of membrane|GO:0045177,apical part of cell	path:hsa04060 Cytokine-cytokine receptor interaction - Homo sapiens (human)
LAPTM4B	2584.64	4303.7	4464.52	2552.18	3005.63	3267.51	3141.27	4122.68	2881.81	3686.96	3727.18	3745.18	3595.89	1931.78	3535.48	3550.62	3868.52	2951.04	3276.62	3020.73	3401.09	3320.31	3360.7	-0.0348324	0.135691	-0.256704	0.797408	0.896948	Not DEG	GO:0007032,endosome organization|GO:0032509,endosome transport via multivesicular body sorting pathway|GO:0032911,negative regulation of transforming growth factor beta1 production|GO:0097213,regulation of lysosomal membrane permeability|GO:1905166,negative regulation of lysosomal protein catabolic process|GO:1905671,regulation of lysosome organization	GO:0005515,protein binding|GO:0019900,kinase binding|GO:0031625,ubiquitin protein ligase binding|GO:0097001,ceramide binding|GO:1902936,phosphatidylinositol bisphosphate binding	GO:0005764,lysosome|GO:0005765,lysosomal membrane|GO:0005768,endosome|GO:0005769,early endosome|GO:0005886,plasma membrane|GO:0016021,integral component of membrane|GO:0031902,late endosome membrane|GO:0032585,multivesicular body membrane|GO:0042995,cell projection|GO:0097487,multivesicular body, internal vesicle	path:hsa04142 Lysosome - Homo sapiens (human)
OR6P1	0	0	0	0	0	0	0	6.13312	0	0	0	0	0	0	0	0	0	0	0	0	0.613312	0	0.306656	-1.58994	3.01498	-0.527346	0.597953	NA	Not DEG	GO:0007186,G-protein coupled receptor signaling pathway|GO:0007186,G-protein coupled receptor signaling pathway|GO:0007608,sensory perception of smell|GO:0050911,detection of chemical stimulus involved in sensory perception of smell	GO:0004930,G-protein coupled receptor activity|GO:0004984,olfactory receptor activity	GO:0005886,plasma membrane|GO:0016021,integral component of membrane	path:hsa04740 Olfactory transduction - Homo sapiens (human)
CCDC116	21.5142	6.03968	19.3342	33.8785	28.1998	16.9126	41.6772	38.0253	17.3404	37.3248	15.61	14.3201	13.8766	14.8081	15.4147	37.3439	47.7315	46.5328	12.2303	25.0371	26.0247	24.2905	25.1576	-0.0965189	0.370845	-0.260267	0.794658	0.894979	Not DEG		GO:0005515,protein binding	GO:0005737,cytoplasm|GO:0005813,centrosome
CCDC117	5006.95	4782.56	4316.57	5159.96	3569.62	5252.19	4589.25	4610.88	3843.79	4307.82	4600.14	4327.54	2530.17	3940.3	3973.7	5035.54	4283.33	3570.04	4014.88	2954.38	4543.96	3923	4233.48	-0.212033	0.115478	-1.83614	0.0663376	0.191807	Not DEG		GO:0005515,protein binding
CCDC114	157.445	12.9422	53.7996	145.07	43.4747	70.1871	191.715	51.5182	23.9463	57.3527	70.8453	65.8725	50.8809	39.7126	33.0316	99.2563	72.7337	141.763	56.7043	204.053	80.745	83.4852	82.1151	0.0475241	0.432481	0.109887	0.912499	0.957535	Not DEG	GO:0003341,cilium movement|GO:0036158,outer dynein arm assembly	GO:0005515,protein binding	GO:0005929,cilium|GO:0005930,axoneme|GO:0036157,outer dynein arm
CCDC115	1651.71	363.244	364.828	1333.42	922.369	268.91	1408.69	1247.48	1206.4	428.78	1330.45	1411.01	1408.01	1375.13	960.118	1410.23	1108.05	1205.52	1139.64	1485.95	919.582	1283.41	1101.5	0.481267	0.2889	1.66586	0.0957418	0.245307	Not DEG	GO:0006879,cellular iron ion homeostasis|GO:0007042,lysosomal lumen acidification|GO:0036295,cellular response to increased oxygen levels|GO:1905146,lysosomal protein catabolic process	GO:0051082,unfolded protein binding	GO:0005764,lysosome|GO:0005768,endosome|GO:0005783,endoplasmic reticulum|GO:0005793,endoplasmic reticulum-Golgi intermediate compartment|GO:0016020,membrane|GO:0016471,vacuolar proton-transporting V-type ATPase complex|GO:0030137,COPI-coated vesicle|GO:0042406,extrinsic component of endoplasmic reticulum membrane
CCDC112	615.111	608.282	359.785	426.522	1012.84	574.181	616.822	380.253	640.77	357.771	876.561	840.113	784.49	529.726	761.929	629.933	480.724	580.036	681.563	603.395	559.234	676.847	618.041	0.275787	0.183821	1.5003	0.133536	0.304501	Not DEG		GO:0005515,protein binding
MCF2L	3821.71	3850.73	4278.75	5846.22	4425.02	3889.04	4160.57	5433.95	4236.02	3757.06	3210.85	3396.73	2900.21	2096.02	3946.17	3492.64	5793.69	6821.92	4217.24	3907.05	4369.91	3978.25	4174.08	-0.135575	0.172446	-0.786188	0.431758	0.642244	Not DEG	GO:0007186,G-protein coupled receptor signaling pathway|GO:0035023,regulation of Rho protein signal transduction|GO:0035556,intracellular signal transduction|GO:0043065,positive regulation of apoptotic process|GO:0051056,regulation of small GTPase mediated signal transduction|GO:0065009,regulation of molecular function	GO:0005085,guanyl-nucleotide exchange factor activity|GO:0005089,Rho guanyl-nucleotide exchange factor activity|GO:0035091,phosphatidylinositol binding	GO:0005615,extracellular space|GO:0005829,cytosol|GO:0005886,plasma membrane|GO:0012505,endomembrane system
CCDC110	597.509	1300.26	509.415	657.591	935.293	1203.33	835.925	924.875	877.756	939.491	313.4	993.815	326.563	450.974	731.099	1168.47	176.152	196.953	106.737	176.512	878.144	464.068	671.106	-0.919705	0.362473	-2.53731	0.011171	0.0559937	Not DEG		GO:0005515,protein binding	GO:0005634,nucleus
ABCD4	1767.1	1857.63	1790.52	1551.46	1270.17	1492.53	2000.5	1922.12	1401.27	1755.17	1430.11	1797.65	1670.74	1690.14	1223.27	1509.48	1886.53	2282.27	1289.74	2044.28	1680.85	1682.42	1681.64	0.00144559	0.120835	0.0119633	0.990455	0.995511	Not DEG	GO:0009235,cobalamin metabolic process|GO:0009235,cobalamin metabolic process|GO:0055085,transmembrane transport|GO:1990830,cellular response to leukemia inhibitory factor	GO:0005524,ATP binding|GO:0042626,ATPase activity, coupled to transmembrane movement of substances|GO:0042626,ATPase activity, coupled to transmembrane movement of substances	GO:0005765,lysosomal membrane|GO:0005777,peroxisome|GO:0005778,peroxisomal membrane|GO:0005789,endoplasmic reticulum membrane|GO:0016021,integral component of membrane|GO:0043190,ATP-binding cassette (ABC) transporter complex	path:hsa02010 ABC transporters - Homo sapiens (human)|path:hsa04146 Peroxisome - Homo sapiens (human)
LEO1	2104.48	1636.75	1321.45	1937.16	3097.28	1904.35	1932.63	1041.4	2246	1641.38	3348.94	2332.27	3512.63	2117.56	2262.66	1611.69	2708.19	2166.48	3158.76	3185.98	1886.29	2640.52	2263.4	0.485211	0.178328	2.72089	0.00651068	0.0384778	Not DEG	GO:0001711,endodermal cell fate commitment|GO:0006366,transcription from RNA polymerase II promoter|GO:0006368,transcription elongation from RNA polymerase II promoter|GO:0006378,mRNA polyadenylation|GO:0010390,histone monoubiquitination|GO:0016055,Wnt signaling pathway|GO:0016567,protein ubiquitination|GO:0019827,stem cell population maintenance|GO:0031442,positive regulation of mRNA 3'-end proc…	GO:0005515,protein binding|GO:1990269,RNA polymerase II C-terminal domain phosphoserine binding	GO:0001650,fibrillar center|GO:0005654,nucleoplasm|GO:0005654,nucleoplasm|GO:0005813,centrosome|GO:0016593,Cdc73/Paf1 complex
MTCL1	161.357	72.4762	133.658	220.645	168.024	160.669	157.182	152.101	259.281	125.63	152.498	98.3314	113.788	100.964	116.712	131.687	438.675	248.896	296.864	118.926	161.102	181.734	171.418	0.172345	0.291447	0.591342	0.554291	0.739479	Not DEG	GO:0001578,microtubule bundle formation|GO:0001578,microtubule bundle formation|GO:0010506,regulation of autophagy|GO:0045197,establishment or maintenance of epithelial cell apical/basal polarity|GO:0045197,establishment or maintenance of epithelial cell apical/basal polarity|GO:0090314,positive regulation of protein targeting to membrane|GO:2000576,positive regulation of microtubule motor activi…	GO:0003723,RNA binding|GO:0008017,microtubule binding|GO:0042803,protein homodimerization activity	GO:0000922,spindle pole|GO:0005615,extracellular space|GO:0005737,cytoplasm|GO:0005856,cytoskeleton|GO:0016324,apical plasma membrane|GO:0016327,apicolateral plasma membrane|GO:0016327,apicolateral plasma membrane|GO:0016328,lateral plasma membrane|GO:0016328,lateral plasma membrane|GO:0030496,midbody|GO:0097427,microtubule bundle|GO:0097427,microtubule bundle
ATP1A4	8.80127	2.58843	11.7687	0	4.69997	2.53688	7.14466	11.0396	24.772	0	2.40154	6.68272	3.70043	26.2507	0	0	25.0022	21.6432	14.454	12.5186	7.33515	11.2653	9.30024	0.620734	0.829657	0.748182	0.45435	0.662597	Not DEG	GO:0006813,potassium ion transport|GO:0006814,sodium ion transport|GO:0007283,spermatogenesis|GO:0009566,fertilization|GO:0010248,establishment or maintenance of transmembrane electrochemical gradient|GO:0015991,ATP hydrolysis coupled proton transport|GO:0030317,flagellated sperm motility|GO:0030641,regulation of cellular pH|GO:0034220,ion transmembrane transport|GO:0042391,regulation of membrane…	GO:0005391,sodium:potassium-exchanging ATPase activity|GO:0005524,ATP binding|GO:0046872,metal ion binding	GO:0005886,plasma membrane|GO:0005887,integral component of plasma membrane|GO:0005890,sodium:potassium-exchanging ATPase complex	path:hsa04022 cGMP-PKG signaling pathway - Homo sapiens (human)|path:hsa04024 cAMP signaling pathway - Homo sapiens (human)|path:hsa04260 Cardiac muscle contraction - Homo sapiens (human)|path:hsa04261 Adrenergic signaling in cardiomyocytes - Homo sapiens (human)|path:hsa04911 Insulin secretion - Homo sapiens (human)|path:hsa04918 Thyroid hormone synthesis - Homo sapiens (human)|path:hsa04919 Thy…
ATP1A3	8.80127	6.90249	33.6247	15.6362	5.87496	6.76502	15.4801	3.67987	51.1955	2.73108	0	15.2748	10.1762	17.5005	19.819	41.2749	3.40939	9.73942	55.5924	6.25929	15.0691	17.9046	16.4869	0.244528	0.646446	0.378265	0.705234	0.84245	Not DEG	GO:0006883,cellular sodium ion homeostasis|GO:0007613,memory|GO:0008344,adult locomotory behavior|GO:0008542,visual learning|GO:0010107,potassium ion import|GO:0010248,establishment or maintenance of transmembrane electrochemical gradient|GO:0021987,cerebral cortex development|GO:0030007,cellular potassium ion homeostasis|GO:0034220,ion transmembrane transport|GO:0035235,ionotropic glutamate rece…	GO:0001540,amyloid-beta binding|GO:0005391,sodium:potassium-exchanging ATPase activity|GO:0005391,sodium:potassium-exchanging ATPase activity|GO:0005391,sodium:potassium-exchanging ATPase activity|GO:0005524,ATP binding|GO:0031748,D1 dopamine receptor binding|GO:0043395,heparan sulfate proteoglycan binding|GO:0046872,metal ion binding|GO:0051087,chaperone binding|GO:0086037,sodium:potassium-excha…	GO:0005634,nucleus|GO:0005783,endoplasmic reticulum|GO:0005794,Golgi apparatus|GO:0005886,plasma membrane|GO:0005886,plasma membrane|GO:0005890,sodium:potassium-exchanging ATPase complex|GO:0005890,sodium:potassium-exchanging ATPase complex|GO:0005890,sodium:potassium-exchanging ATPase complex|GO:0016020,membrane|GO:0016021,integral component of membrane|GO:0030424,axon|GO:0032809,neuronal cell b…	path:hsa04022 cGMP-PKG signaling pathway - Homo sapiens (human)|path:hsa04024 cAMP signaling pathway - Homo sapiens (human)|path:hsa04260 Cardiac muscle contraction - Homo sapiens (human)|path:hsa04261 Adrenergic signaling in cardiomyocytes - Homo sapiens (human)|path:hsa04911 Insulin secretion - Homo sapiens (human)|path:hsa04918 Thyroid hormone synthesis - Homo sapiens (human)|path:hsa04919 Thy…
ATP1A2	215.142	316.652	175.689	317.068	233.823	563.188	483.455	970.26	423.602	463.373	11766.3	547.028	228.501	533.764	402.985	681.035	1191.01	1313.74	433.621	265.394	416.225	1736.34	510.541	0.539633	0.335414	1.60885	0.107648	0.265338	Not DEG	GO:0001504,neurotransmitter uptake|GO:0002026,regulation of the force of heart contraction|GO:0002087,regulation of respiratory gaseous exchange by neurological system process|GO:0006813,potassium ion transport|GO:0006814,sodium ion transport|GO:0006883,cellular sodium ion homeostasis|GO:0006940,regulation of smooth muscle contraction|GO:0006942,regulation of striated muscle contraction|GO:000821…	GO:0005391,sodium:potassium-exchanging ATPase activity|GO:0005391,sodium:potassium-exchanging ATPase activity|GO:0005391,sodium:potassium-exchanging ATPase activity|GO:0005515,protein binding|GO:0005524,ATP binding|GO:0008144,drug binding|GO:0016887,ATPase activity|GO:0030955,potassium ion binding|GO:0031402,sodium ion binding|GO:0051087,chaperone binding|GO:1990239,steroid hormone binding	GO:0005737,cytoplasm|GO:0005768,endosome|GO:0005886,plasma membrane|GO:0005886,plasma membrane|GO:0005890,sodium:potassium-exchanging ATPase complex|GO:0005890,sodium:potassium-exchanging ATPase complex|GO:0005901,caveola|GO:0014704,intercalated disc|GO:0016020,membrane|GO:0030315,T-tubule|GO:0043197,dendritic spine|GO:0043209,myelin sheath|GO:1903561,extracellular vesicle	path:hsa04022 cGMP-PKG signaling pathway - Homo sapiens (human)|path:hsa04024 cAMP signaling pathway - Homo sapiens (human)|path:hsa04260 Cardiac muscle contraction - Homo sapiens (human)|path:hsa04261 Adrenergic signaling in cardiomyocytes - Homo sapiens (human)|path:hsa04911 Insulin secretion - Homo sapiens (human)|path:hsa04918 Thyroid hormone synthesis - Homo sapiens (human)|path:hsa04919 Thy…
ATP1A1	139445	124450	99948.6	117915	104385	110098	72175.3	111922	116132	112772	64997.6	84056.2	88779.7	75820.1	101976	92294.6	71643.8	60078.1	71618.6	65094.1	110924	77635.9	94280.1	-0.514779	0.117401	-4.38479	1.16099e-05	0.000303433	Not DEG	GO:0002026,regulation of the force of heart contraction|GO:0002028,regulation of sodium ion transport|GO:0006883,cellular sodium ion homeostasis|GO:0008217,regulation of blood pressure|GO:0010107,potassium ion import|GO:0010248,establishment or maintenance of transmembrane electrochemical gradient|GO:0016311,dephosphorylation|GO:0030007,cellular potassium ion homeostasis|GO:0031947,negative regul…	GO:0005391,sodium:potassium-exchanging ATPase activity|GO:0005391,sodium:potassium-exchanging ATPase activity|GO:0005391,sodium:potassium-exchanging ATPase activity|GO:0005515,protein binding|GO:0005524,ATP binding|GO:0016791,phosphatase activity|GO:0019901,protein kinase binding|GO:0019904,protein domain specific binding|GO:0030506,ankyrin binding|GO:0030955,potassium ion binding|GO:0031402,sodi…	GO:0005768,endosome|GO:0005783,endoplasmic reticulum|GO:0005794,Golgi apparatus|GO:0005886,plasma membrane|GO:0005886,plasma membrane|GO:0005890,sodium:potassium-exchanging ATPase complex|GO:0005890,sodium:potassium-exchanging ATPase complex|GO:0005901,caveola|GO:0014069,postsynaptic density|GO:0014704,intercalated disc|GO:0016020,membrane|GO:0016021,integral component of membrane|GO:0016323,baso…	path:hsa04022 cGMP-PKG signaling pathway - Homo sapiens (human)|path:hsa04024 cAMP signaling pathway - Homo sapiens (human)|path:hsa04260 Cardiac muscle contraction - Homo sapiens (human)|path:hsa04261 Adrenergic signaling in cardiomyocytes - Homo sapiens (human)|path:hsa04911 Insulin secretion - Homo sapiens (human)|path:hsa04918 Thyroid hormone synthesis - Homo sapiens (human)|path:hsa04919 Thy…
TMEM213	0	0	0	2.60604	0	0	7.14466	0	0	0	9.60614	0	1.85021	4.71167	3.30316	0	135.239	0	8.89479	7.51114	0.97507	17.1116	2.33821	1.95712	1.43648	1.36245	0.173057	NA	Not DEG			GO:0016021,integral component of membrane
MGRN1	5099.85	4772.21	5432.91	6998.96	6731.53	4744.82	5071.52	5506.32	5291.31	5488.56	5830.93	4805.83	11128.1	7776.94	5201.37	3799.25	6377.83	7116.27	4986.64	11555.9	5513.8	6857.91	6185.85	0.314732	0.180317	1.74543	0.0809095	0.21944	Not DEG	GO:0000209,protein polyubiquitination|GO:0006513,protein monoubiquitination|GO:0008333,endosome to lysosome transport|GO:0043951,negative regulation of cAMP-mediated signaling|GO:0045744,negative regulation of G-protein coupled receptor protein signaling pathway	GO:0004842,ubiquitin-protein transferase activity|GO:0005515,protein binding|GO:0046872,metal ion binding|GO:0061630,ubiquitin protein ligase activity	GO:0005634,nucleus|GO:0005737,cytoplasm|GO:0005769,early endosome|GO:0005829,cytosol|GO:0005886,plasma membrane|GO:0016020,membrane|GO:0070062,extracellular exosome	path:hsa04120 Ubiquitin mediated proteolysis - Homo sapiens (human)
NHEJ1	623.913	437.445	657.363	496.885	444.147	495.538	432.252	406.013	619.301	420.586	476.705	518.388	629.072	625.979	465.745	517.901	401.172	557.311	484.766	550.817	503.344	522.786	513.065	0.0544775	0.116493	0.467648	0.640036	0.798226	Not DEG	GO:0006303,double-strand break repair via nonhomologous end joining|GO:0006303,double-strand break repair via nonhomologous end joining|GO:0006310,DNA recombination|GO:0007417,central nervous system development|GO:0010212,response to ionizing radiation|GO:0030183,B cell differentiation|GO:0030217,T cell differentiation|GO:0051351,positive regulation of ligase activity	GO:0005515,protein binding|GO:0045027,DNA end binding	GO:0001650,fibrillar center|GO:0005634,nucleus|GO:0005654,nucleoplasm|GO:0032807,DNA ligase IV complex|GO:0070419,nonhomologous end joining complex	path:hsa03450 Non-homologous end-joining - Homo sapiens (human)
CRTAP	16843.7	22571.1	19915.1	24205.8	12921.4	14505.1	14565.6	14322.1	13689	16483	17504.8	18767	19292.2	21089.4	14213.5	14507.1	12618.2	12760.8	11643.3	17567.3	17002.2	15996.4	16499.3	-0.0879752	0.143482	-0.613144	0.539781	0.728714	Not DEG	GO:0007283,spermatogenesis|GO:0018400,peptidyl-proline hydroxylation to 3-hydroxy-L-proline|GO:0050821,protein stabilization|GO:0061077,chaperone-mediated protein folding|GO:1901874,negative regulation of post-translational protein modification	GO:0032403,protein complex binding	GO:0005578,proteinaceous extracellular matrix|GO:0005615,extracellular space|GO:0005783,endoplasmic reticulum|GO:0005788,endoplasmic reticulum lumen|GO:0032991,macromolecular complex
SPHK2	765.711	532.355	797.747	960.76	555.771	630.838	634.684	684.456	676.276	910.36	284.582	427.694	514.359	411.261	500.979	517.901	558.004	538.914	405.825	684.766	714.896	484.429	599.662	-0.562316	0.147126	-3.82201	0.000132367	0.00208325	Not DEG	GO:0001568,blood vessel development|GO:0003376,sphingosine-1-phosphate signaling pathway|GO:0006669,sphinganine-1-phosphate biosynthetic process|GO:0007420,brain development|GO:0007565,female pregnancy|GO:0008283,cell proliferation|GO:0008284,positive regulation of cell proliferation|GO:0030148,sphingolipid biosynthetic process|GO:0043066,negative regulation of apoptotic process|GO:0046512,sphing…	GO:0003951,NAD+ kinase activity|GO:0005515,protein binding|GO:0005524,ATP binding|GO:0008481,sphinganine kinase activity|GO:0008481,sphinganine kinase activity|GO:0017016,Ras GTPase binding|GO:0017050,D-erythro-sphingosine kinase activity|GO:0038036,sphingosine-1-phosphate receptor activity	GO:0005765,lysosomal membrane|GO:0005829,cytosol|GO:0005829,cytosol|GO:0016020,membrane|GO:0043231,intracellular membrane-bounded organelle	path:hsa00600 Sphingolipid metabolism - Homo sapiens (human)|path:hsa01100 Metabolic pathways - Homo sapiens (human)|path:hsa04020 Calcium signaling pathway - Homo sapiens (human)|path:hsa04071 Sphingolipid signaling pathway - Homo sapiens (human)|path:hsa04072 Phospholipase D signaling pathway - Homo sapiens (human)|path:hsa04370 VEGF signaling pathway - Homo sapiens (human)|path:hsa04371 Apelin…
SPHK1	65.5206	87.144	274.882	258.867	170.374	79.489	78.5912	132.475	115.603	175.699	244.957	229.122	543.037	350.009	184.977	122.842	173.879	430.699	155.659	384.32	143.865	281.95	212.907	0.970356	0.316188	3.06892	0.00214836	0.0174365	Not DEG	GO:0001568,blood vessel development|GO:0003376,sphingosine-1-phosphate signaling pathway|GO:0006457,protein folding|GO:0006670,sphingosine metabolic process|GO:0006954,inflammatory response|GO:0007165,signal transduction|GO:0007420,brain development|GO:0010800,positive regulation of peptidyl-threonine phosphorylation|GO:0010803,regulation of tumor necrosis factor-mediated signaling pathway|GO:001…	GO:0000287,magnesium ion binding|GO:0000287,magnesium ion binding|GO:0003677,DNA binding|GO:0003951,NAD+ kinase activity|GO:0005515,protein binding|GO:0005516,calmodulin binding|GO:0005524,ATP binding|GO:0008481,sphinganine kinase activity|GO:0008481,sphinganine kinase activity|GO:0017050,D-erythro-sphingosine kinase activity|GO:0017050,D-erythro-sphingosine kinase activity|GO:0038036,sphingosine…	GO:0005634,nucleus|GO:0005737,cytoplasm|GO:0005829,cytosol|GO:0005829,cytosol|GO:0005886,plasma membrane	path:hsa00600 Sphingolipid metabolism - Homo sapiens (human)|path:hsa01100 Metabolic pathways - Homo sapiens (human)|path:hsa04020 Calcium signaling pathway - Homo sapiens (human)|path:hsa04071 Sphingolipid signaling pathway - Homo sapiens (human)|path:hsa04072 Phospholipase D signaling pathway - Homo sapiens (human)|path:hsa04370 VEGF signaling pathway - Homo sapiens (human)|path:hsa04371 Apelin…
DPT	4448.56	3345.98	3231.34	5655.11	3426.28	6135.03	7956.77	3248.1	7196.27	2587.24	767.291	4869.79	77.7089	575.496	3260.22	9230.83	1220.56	759.675	1875.69	70.104	4723.07	2270.74	3496.9	-1.05654	0.612345	-1.72541	0.0844543	0.225907	Not DEG	GO:0007155,cell adhesion|GO:0008285,negative regulation of cell proliferation|GO:0030199,collagen fibril organization		GO:0005578,proteinaceous extracellular matrix|GO:0005615,extracellular space|GO:0031012,extracellular matrix|GO:0031012,extracellular matrix|GO:0031012,extracellular matrix|GO:0070062,extracellular exosome
CUEDC1	972.052	2113.03	2325.15	1617.48	2149.06	1009.68	1925.48	1061.03	1961.94	998.665	1066.28	778.059	2018.58	990.123	876.438	1137.02	1028.5	2261.71	1724.48	1230.58	1613.36	1311.18	1462.27	-0.29926	0.231022	-1.29537	0.195191	0.391331	Not DEG
CUEDC2	1436.56	1335.63	1714.86	2281.15	1176.17	1431.65	1150.29	1140.76	1333.56	1556.72	1408.5	1242.99	1805.81	1562.93	1277.22	1183.21	1222.83	1400.31	1377.58	1339.49	1455.74	1382.09	1418.91	-0.0751975	0.124805	-0.602518	0.546829	0.734058	Not DEG	GO:0010936,negative regulation of macrophage cytokine production|GO:1900016,negative regulation of cytokine production involved in inflammatory response	GO:0005515,protein binding	GO:0005654,nucleoplasm|GO:0005829,cytosol|GO:0031965,nuclear membrane
IPO13	2325.49	2399.48	2263.78	2681.62	2019.81	1948.33	1880.24	2099.98	2295.54	3060.63	2184.2	1719.37	2599.55	2295.25	1936.75	1931.07	1803.57	2576.62	1695.57	2476.17	2297.49	2121.81	2209.65	-0.114943	0.11105	-1.03506	0.300642	0.515591	Not DEG	GO:0006606,protein import into nucleus	GO:0005515,protein binding|GO:0008139,nuclear localization sequence binding|GO:0008536,Ran GTPase binding|GO:0008565,protein transporter activity	GO:0005737,cytoplasm|GO:0031965,nuclear membrane
CPEB4	17310.2	17157.9	13356.6	9116.8	18654.2	19105.3	19418	12635.5	14741	16888.1	20558.3	14715.3	15468.7	15228.1	19735.3	16224	12005.6	7319.71	14080.4	9353.88	15838.3	14468.9	15153.6	-0.130445	0.175952	-0.741367	0.458471	0.666643	Not DEG	GO:0002931,response to ischemia|GO:0006412,translation|GO:0035235,ionotropic glutamate receptor signaling pathway|GO:0036294,cellular response to decreased oxygen levels|GO:0042149,cellular response to glucose starvation|GO:0043524,negative regulation of neuron apoptotic process|GO:0071230,cellular response to amino acid stimulus|GO:2000766,negative regulation of cytoplasmic translation	GO:0000900,translation repressor activity, nucleic acid binding|GO:0003723,RNA binding|GO:0003730,mRNA 3'-UTR binding|GO:0005515,protein binding|GO:0008135,translation factor activity, RNA binding|GO:0043022,ribosome binding|GO:0046872,metal ion binding	GO:0005634,nucleus|GO:0005634,nucleus|GO:0005737,cytoplasm|GO:0005737,cytoplasm|GO:0005783,endoplasmic reticulum|GO:0014069,postsynaptic density|GO:0030054,cell junction|GO:0030424,axon|GO:0030425,dendrite|GO:0030426,growth cone|GO:0043005,neuron projection|GO:0043197,dendritic spine|GO:0045202,synapse|GO:0045211,postsynaptic membrane|GO:0048471,perinuclear region of cytoplasm|GO:1990124,messenge…	path:hsa04114 Oocyte meiosis - Homo sapiens (human)|path:hsa04320 Dorso-ventral axis formation - Homo sapiens (human)|path:hsa04914 Progesterone-mediated oocyte maturation - Homo sapiens (human)
C11orf98	567.193	671.267	604.404	746.196	675.62	521.752	425.107	475.93	686.185	617.224	571.565	469.699	874.226	790.887	619.893	605.365	517.091	464.246	693.793	706.047	599.088	631.281	615.185	0.0754289	0.135607	0.556232	0.578052	0.757333	Not DEG
CPEB1	146.688	174.288	132.818	242.362	139.824	190.266	460.83	141.062	139.549	103.781	243.756	222.439	293.259	422.704	187.179	224.064	284.116	220.76	219.034	570.847	187.147	288.816	237.981	0.627269	0.267092	2.34852	0.0188483	0.0806885	Not DEG	GO:0006397,mRNA processing|GO:0006412,translation|GO:0008285,negative regulation of cell proliferation|GO:0010976,positive regulation of neuron projection development|GO:0030335,positive regulation of cell migration|GO:0032869,cellular response to insulin stimulus|GO:0045727,positive regulation of translation|GO:0051028,mRNA transport|GO:0051770,positive regulation of nitric-oxide synthase biosyn…	GO:0000900,translation repressor activity, nucleic acid binding|GO:0000900,translation repressor activity, nucleic acid binding|GO:0003730,mRNA 3'-UTR binding|GO:0008135,translation factor activity, RNA binding|GO:0035925,mRNA 3'-UTR AU-rich region binding|GO:0043022,ribosome binding|GO:0046872,metal ion binding	GO:0000932,P-body|GO:0005634,nucleus|GO:0005634,nucleus|GO:0005737,cytoplasm|GO:0005737,cytoplasm|GO:0005813,centrosome|GO:0014069,postsynaptic density|GO:0030054,cell junction|GO:0030425,dendrite|GO:0030426,growth cone|GO:0043005,neuron projection|GO:0043025,neuronal cell body|GO:0045202,synapse|GO:0045211,postsynaptic membrane|GO:0048471,perinuclear region of cytoplasm|GO:1990124,messenger ribo…	path:hsa04114 Oocyte meiosis - Homo sapiens (human)|path:hsa04320 Dorso-ventral axis formation - Homo sapiens (human)|path:hsa04914 Progesterone-mediated oocyte maturation - Homo sapiens (human)
CPEB3	1754.39	1293.35	2197.38	2665.98	2589.68	1862.07	3071.01	3012.59	1316.22	3104.33	1342.46	1477.83	1993.6	1623.51	2550.04	1634.29	2202.47	1273.7	1839	2180.73	2286.7	1811.76	2049.23	-0.335737	0.184146	-1.82321	0.0682709	0.195406	Not DEG	GO:0000122,negative regulation of transcription from RNA polymerase II promoter|GO:0006412,translation|GO:0007616,long-term memory|GO:0017148,negative regulation of translation|GO:0045727,positive regulation of translation|GO:0048167,regulation of synaptic plasticity|GO:0060213,positive regulation of nuclear-transcribed mRNA poly(A) tail shortening|GO:0060998,regulation of dendritic spine develop…	GO:0000900,translation repressor activity, nucleic acid binding|GO:0000900,translation repressor activity, nucleic acid binding|GO:0003723,RNA binding|GO:0003730,mRNA 3'-UTR binding|GO:0003730,mRNA 3'-UTR binding|GO:0005515,protein binding|GO:0008135,translation factor activity, RNA binding|GO:0008135,translation factor activity, RNA binding|GO:0035613,RNA stem-loop binding|GO:0035925,mRNA 3'-UTR…	GO:0005634,nucleus|GO:0005737,cytoplasm|GO:0005737,cytoplasm|GO:0014069,postsynaptic density|GO:0030014,CCR4-NOT complex|GO:0030054,cell junction|GO:0030425,dendrite|GO:0043005,neuron projection|GO:0043005,neuron projection|GO:0045202,synapse|GO:0045202,synapse|GO:0045211,postsynaptic membrane|GO:0097440,apical dendrite|GO:1990124,messenger ribonucleoprotein complex	path:hsa04114 Oocyte meiosis - Homo sapiens (human)|path:hsa04320 Dorso-ventral axis formation - Homo sapiens (human)|path:hsa04914 Progesterone-mediated oocyte maturation - Homo sapiens (human)
CPEB2	1758.3	2124.24	2124.24	1727.8	3439.2	2662.88	2093.38	3038.35	2160.95	1566.73	2845.82	2239.66	2660.61	3321.05	3305.36	2926.59	4749.28	2226	3049.8	2175.73	2269.61	2949.99	2609.8	0.378489	0.165215	2.29089	0.02197	0.0896106	Not DEG	GO:0006412,translation|GO:0032869,cellular response to insulin stimulus|GO:0034260,negative regulation of GTPase activity|GO:0034599,cellular response to oxidative stress|GO:0071243,cellular response to arsenic-containing substance|GO:0071456,cellular response to hypoxia|GO:1900248,negative regulation of cytoplasmic translational elongation|GO:2000766,negative regulation of cytoplasmic translation	GO:0000900,translation repressor activity, nucleic acid binding|GO:0000900,translation repressor activity, nucleic acid binding|GO:0003723,RNA binding|GO:0003730,mRNA 3'-UTR binding|GO:0005095,GTPase inhibitor activity|GO:0008135,translation factor activity, RNA binding|GO:0035925,mRNA 3'-UTR AU-rich region binding|GO:0043022,ribosome binding|GO:0043022,ribosome binding|GO:0043023,ribosomal large…	GO:0005634,nucleus|GO:0005737,cytoplasm|GO:0043005,neuron projection|GO:0045202,synapse|GO:1990124,messenger ribonucleoprotein complex|GO:1990124,messenger ribonucleoprotein complex	path:hsa04114 Oocyte meiosis - Homo sapiens (human)|path:hsa04320 Dorso-ventral axis formation - Homo sapiens (human)|path:hsa04914 Progesterone-mediated oocyte maturation - Homo sapiens (human)
RBMXL1	5170.26	4742.87	4559.51	4377.28	4345.12	4694.08	3802.15	4912.63	4639.8	4428.9	3985.35	4108.92	4060.29	3735.68	5463.42	4072.45	3644.64	3151.24	4088.27	2578.83	4567.26	3888.91	4228.08	-0.231928	0.104166	-2.22652	0.0259792	0.100724	Not DEG	GO:0006397,mRNA processing|GO:0008380,RNA splicing|GO:0045944,positive regulation of transcription from RNA polymerase II promoter	GO:0001047,core promoter binding|GO:0003682,chromatin binding|GO:0003723,RNA binding	GO:0005634,nucleus|GO:0030529,intracellular ribonucleoprotein complex	path:hsa03040 Spliceosome - Homo sapiens (human)
RBMXL3	23.4701	23.2959	27.7404	19.111	27.0248	20.2951	8.33543	53.9715	17.3404	17.2968	15.61	19.0935	8.32596	6.05786	18.7179	13.7583	23.8657	41.122	17.7896	22.5334	23.7881	18.6874	21.2378	-0.35336	0.353704	-0.999029	0.317781	0.533278	Not DEG		GO:0003723,RNA binding		path:hsa03040 Spliceosome - Homo sapiens (human)
SRBD1	3799.22	3520.27	2631.98	3114.22	4425.02	3862.83	3662.83	3452.95	4587.78	4016.51	3945.72	3484.56	3487.65	3446.92	4394.3	3628.26	3519.63	2552.81	4331.76	2909.32	3707.36	3570.09	3638.73	-0.0544	0.112753	-0.482472	0.629471	0.791371	Not DEG	GO:0006139,nucleobase-containing compound metabolic process	GO:0003723,RNA binding
ABAT	14072.3	9861.07	6133.99	3241.91	5417.89	6201.83	10457.4	6858.06	4771.09	9260.18	7420.75	7853.15	5368.39	7863.1	6044.78	5480.71	4866.34	7675.74	7070.24	7533.68	7627.57	6717.69	7172.63	-0.183232	0.20918	-0.875951	0.381057	0.597071	Not DEG	GO:0001666,response to hypoxia|GO:0007568,aging|GO:0007620,copulation|GO:0007626,locomotory behavior|GO:0009449,gamma-aminobutyric acid biosynthetic process|GO:0009450,gamma-aminobutyric acid catabolic process|GO:0010039,response to iron ion|GO:0014053,negative regulation of gamma-aminobutyric acid secretion|GO:0021549,cerebellum development|GO:0031652,positive regulation of heat generation|GO:00…	GO:0003867,4-aminobutyrate transaminase activity|GO:0003867,4-aminobutyrate transaminase activity|GO:0030170,pyridoxal phosphate binding|GO:0032145,succinate-semialdehyde dehydrogenase binding|GO:0034386,4-aminobutyrate:2-oxoglutarate transaminase activity|GO:0042803,protein homodimerization activity|GO:0046872,metal ion binding|GO:0047298,(S)-3-amino-2-methylpropionate transaminase activity|GO:0…	GO:0005739,mitochondrion|GO:0005739,mitochondrion|GO:0005759,mitochondrial matrix|GO:0032144,4-aminobutyrate transaminase complex|GO:0043005,neuron projection|GO:0070062,extracellular exosome	path:hsa00250 Alanine, aspartate and glutamate metabolism - Homo sapiens (human)|path:hsa00280 Valine, leucine and isoleucine degradation - Homo sapiens (human)|path:hsa00410 beta-Alanine metabolism - Homo sapiens (human)|path:hsa00640 Propanoate metabolism - Homo sapiens (human)|path:hsa00650 Butanoate metabolism - Homo sapiens (human)|path:hsa01100 Metabolic pathways - Homo sapiens (human)|path…
TMEM210	0	0	0	0	0	0	0	3.67987	0	0	0	0	1.85021	0	0	0.982735	0	0	0	0	0.367987	0.283295	0.325641	0.101022	3.02601	0.0333844	0.973368	NA	Not DEG			GO:0016021,integral component of membrane
CDH20	31.2934	32.7868	36.9872	41.6966	43.4747	77.7978	110.742	96.9033	59.4529	38.2351	75.6484	118.38	12.9515	109.715	139.834	66.826	93.19	43.2863	114.52	72.6077	56.937	84.6958	70.8164	0.576773	0.345067	1.67148	0.0946266	0.243567	Not DEG	GO:0007156,homophilic cell adhesion via plasma membrane adhesion molecules	GO:0005509,calcium ion binding	GO:0005886,plasma membrane|GO:0016021,integral component of membrane
ZNF780A	3186.06	3268.33	2977.47	1911.1	1986.91	2944.48	3391.33	2296.24	2219.57	3526.73	1841.98	2826.79	2575.5	2633.82	2282.48	4081.3	2080.86	2872.05	2511.67	2200.76	2770.82	2590.72	2680.77	-0.0968521	0.151234	-0.640414	0.521904	0.715357	Not DEG	GO:0006351,transcription, DNA-templated|GO:0006355,regulation of transcription, DNA-templated	GO:0003677,DNA binding|GO:0003700,DNA binding transcription factor activity|GO:0046872,metal ion binding	GO:0005634,nucleus
ZNF780B	5490.04	6891.28	5586.75	4030.68	4409.74	6458.06	7832.93	6351.46	4908.99	5732.54	4888.33	6403	5891.08	5280.43	5410.57	8324.75	6668.77	5114.28	4647.53	5499.41	5769.25	5812.81	5791.03	0.010931	0.129743	0.0842509	0.932857	0.967184	Not DEG	GO:0006351,transcription, DNA-templated|GO:0006355,regulation of transcription, DNA-templated	GO:0003677,DNA binding|GO:0003700,DNA binding transcription factor activity|GO:0046872,metal ion binding	GO:0005634,nucleus
FRG1	1129.5	1026.75	837.256	1375.99	1672.01	1103.54	1044.31	615.765	1203.09	831.159	1735.11	1390	1748.45	1367.06	1047.1	967.994	1216.02	894.944	1492.1	1353.26	1083.94	1321.2	1202.57	0.285578	0.168303	1.6968	0.0897339	0.234866	Not DEG	GO:0000398,mRNA splicing, via spliceosome|GO:0006364,rRNA processing|GO:0007517,muscle organ development	GO:0003723,RNA binding|GO:0005515,protein binding|GO:0051015,actin filament binding	GO:0005730,nucleolus|GO:0015030,Cajal body|GO:0030018,Z disc|GO:0055120,striated muscle dense body|GO:0071013,catalytic step 2 spliceosome
FRG2	0	0.862811	0	0	2.34998	0	0	0	0	0	0	0	0	0	0	0	2.27293	0	0	0	0.321279	0.227293	0.274286	-0.190951	3.02619	-0.0630995	0.949687	NA	Not DEG			GO:0005634,nucleus
RHEBL1	44.9843	42.2778	39.509	13.0302	37.5997	38.0533	4.7631	26.9857	44.5897	23.6694	3.6023	46.779	22.2026	0	42.9411	15.7238	13.6376	46.5328	37.8028	16.2741	31.5462	24.5496	28.0479	-0.365216	0.535718	-0.681731	0.495409	0.694984	Not DEG	GO:0031929,TOR signaling|GO:0051092,positive regulation of NF-kappaB transcription factor activity	GO:0003924,GTPase activity|GO:0005515,protein binding|GO:0005525,GTP binding|GO:0046872,metal ion binding	GO:0005737,cytoplasm|GO:0012505,endomembrane system|GO:0016020,membrane
C2CD5	7795.97	6720.44	5581.7	5812.34	5444.91	7308.76	7075.59	6312.21	5667.84	7928.32	6053.07	8172.96	6828.21	6516.23	5570.23	8731.6	8554.16	5488.7	4586.38	7199.43	6564.81	6770.1	6667.45	0.0444453	0.122916	0.361591	0.717658	0.849831	Not DEG	GO:0006906,vesicle fusion|GO:0010828,positive regulation of glucose transport|GO:0031340,positive regulation of vesicle fusion|GO:0032869,cellular response to insulin stimulus|GO:0038028,insulin receptor signaling pathway via phosphatidylinositol 3-kinase|GO:0065002,intracellular protein transmembrane transport|GO:0072659,protein localization to plasma membrane|GO:0090314,positive regulation of p…	GO:0005509,calcium ion binding|GO:0005544,calcium-dependent phospholipid binding	GO:0005815,microtubule organizing center|GO:0005829,cytosol|GO:0005886,plasma membrane|GO:0005938,cell cortex|GO:0030659,cytoplasmic vesicle membrane|GO:0032587,ruffle membrane
IFT80	3545.94	3827.43	4026.56	3395.67	3754.1	5543.09	4496.37	6075.47	3283.12	4726.59	6237.99	5750	4834.61	3629.33	3928.56	6040.87	4544.72	4041.86	3584.6	4346.45	4267.43	4693.9	4480.67	0.137475	0.141519	0.971426	0.331336	0.548022	Not DEG	GO:0035735,intraciliary transport involved in cilium assembly|GO:0060271,cilium assembly		GO:0005737,cytoplasm|GO:0005813,centrosome|GO:0005929,cilium|GO:0005929,cilium|GO:0030992,intraciliary transport particle B|GO:0030992,intraciliary transport particle B|GO:0097542,ciliary tip
C20orf141	2.93376	0	1.68124	0	3.52498	0	0	0	0	0	0	0	0	0	0	0	0	0	0	0	0.813997	0	0.406998	-2.10022	2.99846	-0.700434	0.483656	NA	Not DEG			GO:0016021,integral component of membrane
TRAIP	88.9907	94.9093	114.324	99.8982	41.1247	131.918	152.419	133.702	144.503	127.45	75.6484	141.292	166.519	94.9064	113.408	128.738	87.5077	124.448	84.5005	155.23	112.924	117.22	115.072	0.0536395	0.210849	0.254398	0.799188	0.897743	Not DEG	GO:0006915,apoptotic process|GO:0007165,signal transduction|GO:0008283,cell proliferation|GO:0010804,negative regulation of tumor necrosis factor-mediated signaling pathway|GO:0016567,protein ubiquitination|GO:0032688,negative regulation of interferon-beta production	GO:0005057,signal transducer activity, downstream of receptor|GO:0005515,protein binding|GO:0046872,metal ion binding|GO:0061630,ubiquitin protein ligase activity	GO:0005730,nucleolus|GO:0048471,perinuclear region of cytoplasm
IFT88	3049.15	3598.79	2983.35	3155.05	3614.27	3599.84	3709.27	3500.79	2640.7	3182.62	2347.5	3120.83	2408.98	2342.37	3276.73	3527.04	2941.17	1850.49	2136.97	2227.05	3303.38	2617.91	2960.65	-0.335349	0.11653	-2.87779	0.00400471	0.0270224	Not DEG	GO:0035735,intraciliary transport involved in cilium assembly|GO:0060271,cilium assembly|GO:1902017,regulation of cilium assembly|GO:2000785,regulation of autophagosome assembly	GO:0005515,protein binding	GO:0005814,centriole|GO:0005814,centriole|GO:0005929,cilium|GO:0005929,cilium|GO:0005929,cilium|GO:0030992,intraciliary transport particle B|GO:0031514,motile cilium|GO:0036064,ciliary basal body|GO:0036064,ciliary basal body|GO:0097542,ciliary tip
TEX46	7.82335	3.45125	0	0	4.69997	8.45628	10.717	0	0	0	0	2.86402	3.70043	0	0	2.94821	0	0	0	0	3.51478	0.951265	2.23302	-1.8613	1.57968	-1.17827	0.238688	NA	Not DEG
IL10RA	1337.79	221.743	1719.06	591.571	782.544	597.859	526.323	483.29	2253.43	439.704	1015.85	757.056	1116.6	767.328	813.678	911.978	1004.63	1532.34	3326.65	913.856	895.332	1216	1055.66	0.441376	0.365563	1.20739	0.227283	0.432439	Not DEG	GO:0019221,cytokine-mediated signaling pathway|GO:0032496,response to lipopolysaccharide|GO:0050807,regulation of synapse organization	GO:0004871,signal transducer activity|GO:0004872,receptor activity|GO:0004920,interleukin-10 receptor activity|GO:0005515,protein binding|GO:0019969,interleukin-10 binding	GO:0005886,plasma membrane|GO:0005886,plasma membrane|GO:0016021,integral component of membrane	path:hsa04060 Cytokine-cytokine receptor interaction - Homo sapiens (human)|path:hsa04630 Jak-STAT signaling pathway - Homo sapiens (human)|path:hsa05145 Toxoplasmosis - Homo sapiens (human)|path:hsa05152 Tuberculosis - Homo sapiens (human)|path:hsa05169 Epstein-Barr virus infection - Homo sapiens (human)
CLEC9A	90.9465	11.2165	44.5528	23.4544	91.6494	65.959	92.8805	53.9715	166.798	46.4284	52.8338	68.7365	33.3038	47.7898	167.36	76.6533	126.147	57.3544	118.968	36.3039	68.7857	78.5451	73.6654	0.191015	0.399078	0.47864	0.632195	0.793146	Not DEG	GO:0006898,receptor-mediated endocytosis|GO:0050715,positive regulation of cytokine secretion	GO:0030246,carbohydrate binding	GO:0009986,cell surface|GO:0016021,integral component of membrane
SARDH	144.732	88.0068	247.982	205.009	112.799	272.292	107.17	348.361	223.774	347.758	270.173	179.479	209.074	97.5988	139.834	258.459	161.378	301.922	292.416	405.602	209.788	231.593	220.691	0.141114	0.286925	0.491815	0.62285	0.787275	Not DEG	GO:0042426,choline catabolic process|GO:0055114,oxidation-reduction process|GO:1901053,sarcosine catabolic process	GO:0008480,sarcosine dehydrogenase activity|GO:0008480,sarcosine dehydrogenase activity	GO:0005739,mitochondrion|GO:0005759,mitochondrial matrix|GO:0005759,mitochondrial matrix	path:hsa00260 Glycine, serine and threonine metabolism - Homo sapiens (human)|path:hsa01100 Metabolic pathways - Homo sapiens (human)
C11orf91	9.77919	8.62811	20.1748	38.2219	3.52498	16.0669	29.7694	33.1189	7.43161	20.0279	18.0115	14.3201	17.577	22.2121	20.92	16.7065	25.0022	19.4788	20.0133	23.7853	18.6744	19.8027	19.2385	0.0883294	0.354865	0.24891	0.803431	0.900624	Not DEG			GO:0043231,intracellular membrane-bounded organelle
XPA	2239.44	3351.16	2101.55	1680.9	3405.13	3201.55	3256.77	2427.49	2271.59	2689.2	2466.38	2861.16	1799.33	1973.52	3121.48	3301.01	2711.6	1951.13	1884.58	2004.22	2662.48	2407.44	2534.96	-0.145195	0.155206	-0.935503	0.349529	0.566289	Not DEG	GO:0000715,nucleotide-excision repair, DNA damage recognition|GO:0000717,nucleotide-excision repair, DNA duplex unwinding|GO:0006281,DNA repair|GO:0006281,DNA repair|GO:0006283,transcription-coupled nucleotide-excision repair|GO:0006284,base-excision repair|GO:0006293,nucleotide-excision repair, preincision complex stabilization|GO:0006294,nucleotide-excision repair, preincision complex assembly|…	GO:0003684,damaged DNA binding|GO:0005515,protein binding|GO:0019904,protein domain specific binding|GO:0042803,protein homodimerization activity|GO:0046872,metal ion binding	GO:0000110,nucleotide-excision repair factor 1 complex|GO:0005634,nucleus|GO:0005654,nucleoplasm|GO:0005662,DNA replication factor A complex|GO:0005737,cytoplasm|GO:0045171,intercellular bridge	path:hsa01524 Platinum drug resistance - Homo sapiens (human)|path:hsa03420 Nucleotide excision repair - Homo sapiens (human)
GSX1	0	3.45125	0	5.21208	0	3.38251	0	0	0	0	0	0	0	0	0	0	4.54585	0	0	0	1.20458	0.454585	0.829585	-1.49119	2.88454	-0.516961	0.605183	NA	Not DEG	GO:0006366,transcription from RNA polymerase II promoter|GO:0021527,spinal cord association neuron differentiation|GO:0021854,hypothalamus development|GO:0021984,adenohypophysis development|GO:0045944,positive regulation of transcription from RNA polymerase II promoter|GO:0048663,neuron fate commitment	GO:0000978,RNA polymerase II proximal promoter sequence-specific DNA binding|GO:0001077,transcriptional activator activity, RNA polymerase II proximal promoter sequence-specific DNA binding|GO:0043565,sequence-specific DNA binding	GO:0005634,nucleus
ADCY6	3469.66	3024.15	3148.96	3505.12	3749.4	3141.51	3492.55	3769.42	2664.64	3686.96	3377.76	3178.11	3696.73	3453.65	3162.22	3306.9	4887.93	6260.28	3869.23	5023.7	3365.24	4021.65	3693.44	0.257069	0.128103	2.00674	0.0447773	0.146896	Not DEG	GO:0003091,renal water homeostasis|GO:0003091,renal water homeostasis|GO:0006171,cAMP biosynthetic process|GO:0006182,cGMP biosynthetic process|GO:0007186,G-protein coupled receptor signaling pathway|GO:0007189,adenylate cyclase-activating G-protein coupled receptor signaling pathway|GO:0007189,adenylate cyclase-activating G-protein coupled receptor signaling pathway|GO:0007190,activation of aden…	GO:0004016,adenylate cyclase activity|GO:0004383,guanylate cyclase activity|GO:0005515,protein binding|GO:0005524,ATP binding|GO:0019901,protein kinase binding|GO:0046872,metal ion binding	GO:0005886,plasma membrane|GO:0005886,plasma membrane|GO:0005929,cilium|GO:0008074,guanylate cyclase complex, soluble|GO:0016020,membrane|GO:0016021,integral component of membrane|GO:0031226,intrinsic component of plasma membrane	path:hsa00230 Purine metabolism - Homo sapiens (human)|path:hsa01522 Endocrine resistance - Homo sapiens (human)|path:hsa04015 Rap1 signaling pathway - Homo sapiens (human)|path:hsa04022 cGMP-PKG signaling pathway - Homo sapiens (human)|path:hsa04024 cAMP signaling pathway - Homo sapiens (human)|path:hsa04062 Chemokine signaling pathway - Homo sapiens (human)|path:hsa04072 Phospholipase D signali…
CNTF	71.3881	127.696	258.07	157.231	166.849	208.87	292.931	230.605	126.337	171.148	75.6484	137.473	112.863	92.8871	213.604	143.479	305.709	193.706	115.632	155.23	181.113	154.623	167.868	-0.228395	0.265549	-0.860086	0.389742	0.604389	Not DEG	GO:0007165,signal transduction|GO:0008284,positive regulation of cell proliferation|GO:0010469,regulation of receptor activity|GO:0010628,positive regulation of gene expression|GO:0040007,growth|GO:0042531,positive regulation of tyrosine phosphorylation of STAT protein|GO:0042531,positive regulation of tyrosine phosphorylation of STAT protein|GO:0043524,negative regulation of neuron apoptotic pro…	GO:0005125,cytokine activity|GO:0005127,ciliary neurotrophic factor receptor binding|GO:0005138,interleukin-6 receptor binding|GO:0005515,protein binding|GO:0008083,growth factor activity	GO:0005576,extracellular region|GO:0005615,extracellular space|GO:0005737,cytoplasm|GO:0030424,axon|GO:0097058,CRLF-CLCF1 complex	path:hsa04060 Cytokine-cytokine receptor interaction - Homo sapiens (human)|path:hsa04630 Jak-STAT signaling pathway - Homo sapiens (human)
MCM10	156.467	58.6712	148.789	46.9087	135.124	161.515	126.222	62.5578	315.43	78.291	67.243	112.651	149.867	107.022	167.36	113.015	85.2348	81.1618	110.073	80.1188	128.998	107.375	118.186	-0.264945	0.301371	-0.879132	0.37933	0.595654	Not DEG	GO:0000082,G1/S transition of mitotic cell cycle|GO:0006260,DNA replication|GO:0006270,DNA replication initiation|GO:0006974,cellular response to DNA damage stimulus|GO:0008283,cell proliferation	GO:0003688,DNA replication origin binding|GO:0003697,single-stranded DNA binding|GO:0005515,protein binding|GO:0019899,enzyme binding|GO:0042802,identical protein binding|GO:0046872,metal ion binding	GO:0005634,nucleus|GO:0005654,nucleoplasm|GO:0005730,nucleolus|GO:0031298,replication fork protection complex
SP4	3941.01	3832.61	3844.15	2536.55	4267.57	3199.86	3951	3703.18	3179.9	3464.83	2921.47	3466.42	2451.53	3081.43	4634.33	4155.99	4139	2954.29	4052.69	2946.87	3592.06	3480.4	3536.23	-0.0454911	0.123525	-0.368274	0.712669	0.846912	Not DEG	GO:0006351,transcription, DNA-templated|GO:0006357,regulation of transcription from RNA polymerase II promoter	GO:0000981,RNA polymerase II transcription factor activity, sequence-specific DNA binding|GO:0000981,RNA polymerase II transcription factor activity, sequence-specific DNA binding|GO:0003713,transcription coactivator activity|GO:0005515,protein binding|GO:0043565,sequence-specific DNA binding|GO:0046872,metal ion binding	GO:0005634,nucleus|GO:0005654,nucleoplasm|GO:0005829,cytosol
CREBL2	6054.3	9823.97	8095.99	5238.14	6731.53	7981.88	7304.22	8910.2	6031.99	6908.72	7550.43	7927.61	7464.68	8969.67	7743.7	8831.84	6697.18	8023.12	7592.81	7278.3	7308.09	7807.93	7558.01	0.0955356	0.104985	0.90999	0.362828	0.580364	Not DEG	GO:0006351,transcription, DNA-templated|GO:0007049,cell cycle|GO:0007165,signal transduction|GO:0030154,cell differentiation|GO:0033138,positive regulation of peptidyl-serine phosphorylation|GO:0045600,positive regulation of fat cell differentiation|GO:0045893,positive regulation of transcription, DNA-templated|GO:0046326,positive regulation of glucose import|GO:0046889,positive regulation of lip…	GO:0003677,DNA binding|GO:0003700,DNA binding transcription factor activity	GO:0005634,nucleus
IL10RB	1504.04	1364.1	1911.57	1495.87	1131.52	1599.93	1158.63	1427.79	1737.34	1500.27	1851.58	1475.93	1343.25	1576.39	1304.75	1791.53	1131.92	1602.68	1604.4	1136.69	1483.11	1481.91	1482.51	-0.00151292	0.116241	-0.0130154	0.989616	0.994955	Not DEG	GO:0006954,inflammatory response|GO:0006955,immune response|GO:0007165,signal transduction|GO:0019221,cytokine-mediated signaling pathway|GO:0051607,defense response to virus	GO:0004872,receptor activity|GO:0004920,interleukin-10 receptor activity|GO:0005515,protein binding	GO:0005886,plasma membrane|GO:0005886,plasma membrane|GO:0016021,integral component of membrane|GO:0032002,interleukin-28 receptor complex|GO:0070062,extracellular exosome	path:hsa04060 Cytokine-cytokine receptor interaction - Homo sapiens (human)|path:hsa04630 Jak-STAT signaling pathway - Homo sapiens (human)|path:hsa05145 Toxoplasmosis - Homo sapiens (human)|path:hsa05152 Tuberculosis - Homo sapiens (human)|path:hsa05169 Epstein-Barr virus infection - Homo sapiens (human)
ZNF221	1328.99	1279.55	918.796	978.134	930.593	1222.78	1302.71	1458.46	874.453	1278.15	925.792	1186.66	943.609	1031.18	866.529	1333.57	1031.91	1206.61	941.736	1274.39	1157.26	1074.2	1115.73	-0.107067	0.118342	-0.904722	0.365613	0.583526	Not DEG	GO:0006351,transcription, DNA-templated|GO:0006355,regulation of transcription, DNA-templated	GO:0003677,DNA binding|GO:0003700,DNA binding transcription factor activity|GO:0046872,metal ion binding	GO:0005634,nucleus
ATG4C	1223.38	1107.85	1233.19	825.246	1117.42	1940.72	1846.89	1539.41	1031.34	1443.83	939	1169.48	699.38	1024.45	1359.8	2109.93	1622.87	965.285	1188.57	846.255	1330.93	1192.5	1261.71	-0.158284	0.195658	-0.808985	0.418524	0.630315	Not DEG	GO:0000045,autophagosome assembly|GO:0000422,autophagy of mitochondrion|GO:0006501,C-terminal protein lipidation|GO:0006508,proteolysis|GO:0006612,protein targeting to membrane|GO:0006612,protein targeting to membrane|GO:0006914,autophagy|GO:0044804,autophagy of nucleus|GO:0051697,protein delipidation	GO:0004197,cysteine-type endopeptidase activity|GO:0008233,peptidase activity	GO:0005576,extracellular region|GO:0005737,cytoplasm|GO:0005829,cytosol|GO:0005829,cytosol	path:hsa04136 Autophagy - other - Homo sapiens (human)|path:hsa04140 Autophagy - animal - Homo sapiens (human)
ATG4B	2469.25	2184.64	2554.64	2234.25	2684.86	2174.11	2311.3	2427.49	2066.81	2208.53	1639.05	1955.17	1991.75	1926.4	2208.71	1748.29	2287.7	2763.83	2152.54	2419.84	2331.59	2109.33	2220.46	-0.144581	0.0900597	-1.60539	0.108408	0.266377	Not DEG	GO:0000045,autophagosome assembly|GO:0000422,autophagy of mitochondrion|GO:0006501,C-terminal protein lipidation|GO:0006508,proteolysis|GO:0006612,protein targeting to membrane|GO:0006914,autophagy|GO:0006914,autophagy|GO:0016236,macroautophagy|GO:0044804,autophagy of nucleus|GO:0045732,positive regulation of protein catabolic process|GO:0051697,protein delipidation	GO:0004175,endopeptidase activity|GO:0004197,cysteine-type endopeptidase activity|GO:0004197,cysteine-type endopeptidase activity|GO:0005515,protein binding|GO:0008234,cysteine-type peptidase activity	GO:0005737,cytoplasm|GO:0005829,cytosol|GO:0005829,cytosol	path:hsa04136 Autophagy - other - Homo sapiens (human)|path:hsa04140 Autophagy - animal - Homo sapiens (human)
ATG4A	1724.07	1708.37	1820.78	1642.67	1858.84	1909.43	1399.16	1425.34	1857.08	2203.07	2203.41	1524.61	1626.34	1794.47	1814.54	1923.21	1720.61	1225	1621.08	1597.37	1754.88	1705.06	1729.97	-0.0419416	0.102739	-0.408234	0.683102	0.827227	Not DEG	GO:0000045,autophagosome assembly|GO:0000422,autophagy of mitochondrion|GO:0006501,C-terminal protein lipidation|GO:0006508,proteolysis|GO:0006612,protein targeting to membrane|GO:0044804,autophagy of nucleus|GO:0051697,protein delipidation	GO:0004197,cysteine-type endopeptidase activity|GO:0005515,protein binding|GO:0008234,cysteine-type peptidase activity	GO:0005737,cytoplasm|GO:0005829,cytosol	path:hsa04136 Autophagy - other - Homo sapiens (human)|path:hsa04140 Autophagy - animal - Homo sapiens (human)
THUMPD2	765.711	1047.45	876.765	750.54	1095.09	553.041	1159.82	732.295	441.768	661.832	1089.1	511.705	623.522	519.629	881.943	917.875	740.974	976.106	738.267	697.284	808.431	769.64	789.036	-0.0709545	0.184328	-0.384937	0.700284	0.839907	Not DEG	GO:0030488,tRNA methylation	GO:0003723,RNA binding|GO:0016423,tRNA (guanine) methyltransferase activity
CDH22	13.6909	19.8447	32.7841	27.7978	14.0999	30.4426	40.4864	12.2662	38.8095	11.8347	175.312	20.0481	272.906	250.391	14.3137	43.2403	32.9574	51.9436	18.9014	300.446	24.2057	118.046	71.1258	2.28473	0.534811	4.27204	1.93695e-05	0.0004531	Up	GO:0007156,homophilic cell adhesion via plasma membrane adhesion molecules|GO:0007420,brain development|GO:0016339,calcium-dependent cell-cell adhesion via plasma membrane cell adhesion molecules	GO:0005509,calcium ion binding	GO:0005886,plasma membrane|GO:0016021,integral component of membrane
ATG4D	481.136	425.366	575.823	642.823	626.271	487.927	421.535	608.406	491.312	487.953	497.118	350.365	497.707	405.876	467.947	387.198	380.715	462.081	470.312	429.387	524.855	434.871	479.863	-0.271546	0.102679	-2.64461	0.00817861	0.0450044	Not DEG	GO:0000045,autophagosome assembly|GO:0000422,autophagy of mitochondrion|GO:0006501,C-terminal protein lipidation|GO:0006508,proteolysis|GO:0006612,protein targeting to membrane|GO:0006915,apoptotic process|GO:0044804,autophagy of nucleus|GO:0051697,protein delipidation	GO:0004197,cysteine-type endopeptidase activity|GO:0004197,cysteine-type endopeptidase activity	GO:0005737,cytoplasm|GO:0005759,mitochondrial matrix|GO:0005829,cytosol	path:hsa04136 Autophagy - other - Homo sapiens (human)|path:hsa04140 Autophagy - animal - Homo sapiens (human)
PHOX2A	0	0	14.2905	8.6868	9.39993	0	41.6772	0	8.25734	10.9243	0	0	8.32596	0	12.1116	7.86188	0	11.9037	11.1185	0	9.32361	5.13216	7.22789	-0.859364	1.26256	-0.680654	0.496091	0.695384	Not DEG	GO:0003357,noradrenergic neuron differentiation|GO:0003357,noradrenergic neuron differentiation|GO:0006351,transcription, DNA-templated|GO:0021523,somatic motor neuron differentiation|GO:0021623,oculomotor nerve formation|GO:0021642,trochlear nerve formation|GO:0021703,locus ceruleus development|GO:0030901,midbrain development|GO:0043576,regulation of respiratory gaseous exchange|GO:0045944,posit…	GO:0000977,RNA polymerase II regulatory region sequence-specific DNA binding|GO:0003700,DNA binding transcription factor activity	GO:0000790,nuclear chromatin
CAMKV	2.93376	0	0	2.60604	0	3.38251	4.7631	2.45325	1.65147	0	0	1.90935	8.32596	2.01929	0	3.93094	0	0	0	5.00743	1.77901	2.1193	1.94915	0.273273	1.16492	0.234584	0.814531	NA	Not DEG	GO:0018105,peptidyl-serine phosphorylation|GO:0018107,peptidyl-threonine phosphorylation|GO:0035556,intracellular signal transduction	GO:0004683,calmodulin-dependent protein kinase activity|GO:0005516,calmodulin binding|GO:0005524,ATP binding	GO:0005622,intracellular|GO:0005886,plasma membrane|GO:0030659,cytoplasmic vesicle membrane
LOC100996842	111.483	158.757	116.846	110.322	148.049	205.488	172.663	126.342	180.01	170.237	96.0614	136.518	115.638	72.6943	53.9516	142.497	154.559	140.68	126.751	146.467	150.02	118.582	134.301	-0.341848	0.191987	-1.78058	0.0749817	0.208486	Not DEG
NLRP14	111.483	185.504	75.6556	16.5049	48.1747	52.4289	170.281	141.062	113.126	162.044	43.2276	150.838	29.6034	28.9431	67.1642	87.4634	71.5972	27.0539	154.547	10.0149	107.626	67.0453	87.3359	-0.682313	0.450052	-1.51608	0.1295	0.298567	Not DEG	GO:0007275,multicellular organism development|GO:0007283,spermatogenesis|GO:0030154,cell differentiation	GO:0005524,ATP binding
UPK2	3.91168	0	0	0	3.52498	0	16.6709	0	0	0	28.8184	0	26.8281	9.42333	0	3.93094	0	4.32863	0	0	2.41075	7.33294	4.87185	1.62125	1.70059	0.953342	0.340417	0.557432	Not DEG	GO:0007275,multicellular organism development|GO:0030855,epithelial cell differentiation	GO:0005515,protein binding	GO:0005887,integral component of plasma membrane|GO:0016324,apical plasma membrane|GO:0070062,extracellular exosome
FAM171B	507.54	472.821	594.317	555.087	629.796	859.158	732.327	555.661	775.364	436.062	439.481	779.014	741.935	799.637	755.322	1077.08	1858.12	915.505	1057.37	558.328	611.813	898.179	754.996	0.553881	0.210303	2.63373	0.00844532	0.0459901	Not DEG			GO:0016021,integral component of membrane
CFH	24249.5	16745.4	20070.6	24145.8	21980.6	27546.3	23850.1	23405.2	22933.1	22475.9	50243.7	25791.5	7011.38	29075.7	25580.8	38299.2	16518.5	33106.4	38229.8	35475.1	22740.3	29933.2	26336.7	0.396492	0.228274	1.73691	0.0824023	0.222409	Not DEG	GO:0006956,complement activation|GO:0006957,complement activation, alternative pathway|GO:0016032,viral process|GO:0030449,regulation of complement activation	GO:0005515,protein binding|GO:0008201,heparin binding|GO:0043395,heparan sulfate proteoglycan binding	GO:0005576,extracellular region|GO:0005615,extracellular space|GO:0070062,extracellular exosome|GO:0072562,blood microparticle	path:hsa04610 Complement and coagulation cascades - Homo sapiens (human)|path:hsa05150 Staphylococcus aureus infection - Homo sapiens (human)
GPT2	695.301	789.472	969.233	912.114	337.223	771.213	785.912	524.995	575.537	1056.93	762.488	645.359	971.362	833.292	371.055	629.933	511.409	392.823	452.522	395.587	741.793	596.583	669.188	-0.314015	0.215774	-1.45529	0.145588	0.32212	Not DEG	GO:0006103,2-oxoglutarate metabolic process|GO:0008652,cellular amino acid biosynthetic process|GO:0042851,L-alanine metabolic process|GO:0042853,L-alanine catabolic process	GO:0004021,L-alanine:2-oxoglutarate aminotransferase activity|GO:0004021,L-alanine:2-oxoglutarate aminotransferase activity|GO:0030170,pyridoxal phosphate binding	GO:0005759,mitochondrial matrix	path:hsa00220 Arginine biosynthesis - Homo sapiens (human)|path:hsa00250 Alanine, aspartate and glutamate metabolism - Homo sapiens (human)|path:hsa01100 Metabolic pathways - Homo sapiens (human)|path:hsa01200 Carbon metabolism - Homo sapiens (human)|path:hsa01210 2-Oxocarboxylic acid metabolism - Homo sapiens (human)|path:hsa01230 Biosynthesis of amino acids - Homo sapiens (human)
PNP	1036.59	598.791	1107.93	524.683	984.643	719.629	658.499	550.754	966.109	688.232	3225.26	1697.41	4160.2	2444.68	790.556	798.964	1095.55	2535.5	1097.39	3298.64	783.587	2114.42	1449	1.43204	0.288749	4.95947	7.06866e-07	3.02434e-05	Up	GO:0006139,nucleobase-containing compound metabolic process|GO:0006148,inosine catabolic process|GO:0006195,purine nucleotide catabolic process|GO:0006738,nicotinamide riboside catabolic process|GO:0006955,immune response|GO:0034356,NAD biosynthesis via nicotinamide riboside salvage pathway|GO:0034418,urate biosynthetic process|GO:0042102,positive regulation of T cell proliferation|GO:0042493,res…	GO:0001882,nucleoside binding|GO:0002060,purine nucleobase binding|GO:0004731,purine-nucleoside phosphorylase activity|GO:0004731,purine-nucleoside phosphorylase activity|GO:0008144,drug binding|GO:0042301,phosphate ion binding	GO:0005576,extracellular region|GO:0005622,intracellular|GO:0005634,nucleus|GO:0005737,cytoplasm|GO:0005829,cytosol|GO:0005856,cytoskeleton|GO:0034774,secretory granule lumen|GO:0070062,extracellular exosome|GO:1904813,ficolin-1-rich granule lumen	path:hsa00230 Purine metabolism - Homo sapiens (human)|path:hsa00240 Pyrimidine metabolism - Homo sapiens (human)|path:hsa00760 Nicotinate and nicotinamide metabolism - Homo sapiens (human)|path:hsa01100 Metabolic pathways - Homo sapiens (human)
CFD	463.534	411.561	352.219	1626.17	853.044	2111.53	884.747	1112.55	882.71	1096.98	343.42	679.728	57.3566	118.465	940.299	1987.09	510.272	1016.15	470.312	148.971	979.505	627.206	803.355	-0.643158	0.468538	-1.37269	0.169848	0.357602	Not DEG	GO:0002576,platelet degranulation|GO:0006508,proteolysis|GO:0006956,complement activation|GO:0006957,complement activation, alternative pathway|GO:0043312,neutrophil degranulation	GO:0004252,serine-type endopeptidase activity|GO:0008236,serine-type peptidase activity	GO:0005576,extracellular region|GO:0031093,platelet alpha granule lumen|GO:0034774,secretory granule lumen|GO:0070062,extracellular exosome|GO:1904813,ficolin-1-rich granule lumen	path:hsa04610 Complement and coagulation cascades - Homo sapiens (human)|path:hsa05150 Staphylococcus aureus infection - Homo sapiens (human)
CFB	3800.19	339.948	2366.34	995.507	1407.64	1531.43	883.556	1192.28	2563.08	1161.62	13404.2	2854.47	6314.78	1524.56	1105.46	1548.79	2084.27	2445.68	7257.04	5862.45	1624.16	4440.17	3032.16	1.45084	0.428483	3.38599	0.000709208	0.00765679	Up	GO:0006508,proteolysis|GO:0006956,complement activation|GO:0006957,complement activation, alternative pathway|GO:0006957,complement activation, alternative pathway|GO:0030449,regulation of complement activation	GO:0001848,complement binding|GO:0004252,serine-type endopeptidase activity|GO:0005515,protein binding	GO:0005576,extracellular region|GO:0005615,extracellular space|GO:0005886,plasma membrane|GO:0070062,extracellular exosome|GO:0072562,blood microparticle	path:hsa04610 Complement and coagulation cascades - Homo sapiens (human)|path:hsa05150 Staphylococcus aureus infection - Homo sapiens (human)
OR5P3	0	0	0	4.3434	0	0	4.7631	0	0	0	2.40154	0	0	6.73095	0	4.91368	0	5.41079	14.454	42.5631	0.910651	7.64741	4.27903	3.08212	1.59806	1.92866	0.0537731	0.166389	Not DEG	GO:0007186,G-protein coupled receptor signaling pathway|GO:0007186,G-protein coupled receptor signaling pathway|GO:0050911,detection of chemical stimulus involved in sensory perception of smell	GO:0004930,G-protein coupled receptor activity|GO:0004984,olfactory receptor activity|GO:0005549,odorant binding	GO:0005886,plasma membrane|GO:0016021,integral component of membrane	path:hsa04740 Olfactory transduction - Homo sapiens (human)
OR5P2	0	0	0	0	5.87496	0	5.95388	0	0	2.73108	0	0	0	0	0	5.89641	0	8.65726	8.89479	48.8224	1.45599	7.22709	4.34154	2.32626	1.86317	1.24855	0.21183	0.413029	Not DEG	GO:0007186,G-protein coupled receptor signaling pathway|GO:0007186,G-protein coupled receptor signaling pathway|GO:0050911,detection of chemical stimulus involved in sensory perception of smell	GO:0004930,G-protein coupled receptor activity|GO:0004984,olfactory receptor activity|GO:0005549,odorant binding	GO:0005886,plasma membrane|GO:0016021,integral component of membrane	path:hsa04740 Olfactory transduction - Homo sapiens (human)
SMKR1	11.735	6.90249	51.2777	13.8989	0	30.4426	38.1048	14.7195	13.2117	36.4144	0	25.7762	96.2111	8.07714	13.2126	20.6374	28.4116	0	8.89479	0	21.6707	20.1221	20.8964	-0.104988	0.833919	-0.125898	0.899813	0.951197	Not DEG
MRLN	0	0	0	0	0	0	5.95388	0	0	0	57.6369	0	0	0	0	0	0	0	0	0	0.595388	5.76369	0.297694	-1.58994	3.01498	-0.527346	0.597953	NA	Not DEG	GO:0043086,negative regulation of catalytic activity|GO:1902081,negative regulation of calcium ion import into sarcoplasmic reticulum	GO:0004857,enzyme inhibitor activity	GO:0016021,integral component of membrane|GO:0033017,sarcoplasmic reticulum membrane
CREBBP	20389.6	18482.3	13353.2	23853.1	18371	17814.8	19557.3	15286.2	19185.1	17431.6	18972.1	20106.4	19495.7	17356.4	15011.8	14974.9	15860.5	15905.6	20562.5	19819.4	18372.4	17806.5	18089.5	-0.045149	0.100016	-0.451416	0.65169	0.806145	Not DEG	GO:0000122,negative regulation of transcription from RNA polymerase II promoter|GO:0001666,response to hypoxia|GO:0002223,stimulatory C-type lectin receptor signaling pathway|GO:0006355,regulation of transcription, DNA-templated|GO:0006355,regulation of transcription, DNA-templated|GO:0006367,transcription initiation from RNA polymerase II promoter|GO:0006461,protein complex assembly|GO:0006473,p…	GO:0000987,proximal promoter sequence-specific DNA binding|GO:0001078,transcriptional repressor activity, RNA polymerase II proximal promoter sequence-specific DNA binding|GO:0001085,RNA polymerase II transcription factor binding|GO:0001102,RNA polymerase II activating transcription factor binding|GO:0001105,RNA polymerase II transcription coactivator activity|GO:0001191,transcriptional repressor…	GO:0000123,histone acetyltransferase complex|GO:0000790,nuclear chromatin|GO:0005634,nucleus|GO:0005634,nucleus|GO:0005654,nucleoplasm|GO:0005654,nucleoplasm|GO:0005737,cytoplasm|GO:0016604,nuclear body	path:hsa04024 cAMP signaling pathway - Homo sapiens (human)|path:hsa04066 HIF-1 signaling pathway - Homo sapiens (human)|path:hsa04068 FoxO signaling pathway - Homo sapiens (human)|path:hsa04110 Cell cycle - Homo sapiens (human)|path:hsa04310 Wnt signaling pathway - Homo sapiens (human)|path:hsa04330 Notch signaling pathway - Homo sapiens (human)|path:hsa04350 TGF-beta signaling pathway - Homo sa…
PNN	10277.9	11038.8	6350.03	16769.9	14868.3	10982.2	11849.4	8105.53	11192.8	8484.55	12747.4	13887.6	14500.1	10859	10144	8766.98	11253.3	9367.16	12426	12218.1	10991.9	11617	11304.5	0.0797933	0.153519	0.519761	0.60323	0.774271	Not DEG	GO:0000398,mRNA splicing, via spliceosome|GO:0006351,transcription, DNA-templated|GO:0006355,regulation of transcription, DNA-templated|GO:0007155,cell adhesion	GO:0003677,DNA binding|GO:0003723,RNA binding|GO:0005198,structural molecule activity|GO:0005515,protein binding	GO:0005882,intermediate filament|GO:0005886,plasma membrane|GO:0005911,cell-cell junction|GO:0016020,membrane|GO:0016607,nuclear speck|GO:0030057,desmosome|GO:0035145,exon-exon junction complex|GO:0071013,catalytic step 2 spliceosome	path:hsa03013 RNA transport - Homo sapiens (human)|path:hsa03015 mRNA surveillance pathway - Homo sapiens (human)
ATP6V0E1	4223.63	5878.33	6063.38	4156.63	4181.8	4314.39	4130.8	3628.35	4716.59	6162.23	4606.15	4339.95	4858.66	4550.12	4426.23	3665.6	3259.38	3234.57	4086.04	4415.3	4745.61	4144.2	4444.91	-0.195607	0.116616	-1.67735	0.0934731	0.241711	Not DEG	GO:0007035,vacuolar acidification|GO:0008286,insulin receptor signaling pathway|GO:0015991,ATP hydrolysis coupled proton transport|GO:0015992,proton transport|GO:0016241,regulation of macroautophagy|GO:0033572,transferrin transport|GO:0034220,ion transmembrane transport|GO:0090383,phagosome acidification|GO:1902600,hydrogen ion transmembrane transport	GO:0005215,transporter activity|GO:0042625,ATPase coupled ion transmembrane transporter activity|GO:0046961,proton-transporting ATPase activity, rotational mechanism	GO:0010008,endosome membrane|GO:0016020,membrane|GO:0016021,integral component of membrane|GO:0030670,phagocytic vesicle membrane|GO:0033179,proton-transporting V-type ATPase, V0 domain	path:hsa00190 Oxidative phosphorylation - Homo sapiens (human)|path:hsa01100 Metabolic pathways - Homo sapiens (human)|path:hsa04145 Phagosome - Homo sapiens (human)|path:hsa04721 Synaptic vesicle cycle - Homo sapiens (human)|path:hsa04966 Collecting duct acid secretion - Homo sapiens (human)|path:hsa05110 Vibrio cholerae infection - Homo sapiens (human)|path:hsa05120 Epithelial cell signaling in…
ATP6V0E2	2826.19	1929.25	1765.3	2429.7	1946.96	2985.07	2722.11	2030.06	2577.12	5090.73	1139.53	1818.65	1605.06	858.196	1811.23	2785.07	1941.08	983.681	2100.28	1276.89	2630.25	1631.97	2131.11	-0.688676	0.220351	-3.12536	0.00177588	0.0150993	Not DEG	GO:0007035,vacuolar acidification|GO:0008286,insulin receptor signaling pathway|GO:0015991,ATP hydrolysis coupled proton transport|GO:0016241,regulation of macroautophagy|GO:0033572,transferrin transport|GO:0034220,ion transmembrane transport|GO:0090383,phagosome acidification|GO:1902600,hydrogen ion transmembrane transport	GO:0042625,ATPase coupled ion transmembrane transporter activity|GO:0046961,proton-transporting ATPase activity, rotational mechanism	GO:0010008,endosome membrane|GO:0016020,membrane|GO:0016021,integral component of membrane|GO:0030670,phagocytic vesicle membrane|GO:0033179,proton-transporting V-type ATPase, V0 domain	path:hsa00190 Oxidative phosphorylation - Homo sapiens (human)|path:hsa01100 Metabolic pathways - Homo sapiens (human)|path:hsa04145 Phagosome - Homo sapiens (human)|path:hsa04721 Synaptic vesicle cycle - Homo sapiens (human)|path:hsa04966 Collecting duct acid secretion - Homo sapiens (human)|path:hsa05110 Vibrio cholerae infection - Homo sapiens (human)|path:hsa05120 Epithelial cell signaling in…
CFP	36.183	12.0794	81.5399	106.848	35.2498	33.8251	58.348	17.1727	131.292	20.9383	14.4092	23.8668	36.0792	23.5583	56.1537	19.6547	32.9574	54.1079	108.961	40.0594	53.3476	40.9808	47.1642	-0.384973	0.444014	-0.867027	0.385927	0.600878	Not DEG	GO:0006955,immune response|GO:0006956,complement activation|GO:0006957,complement activation, alternative pathway|GO:0030449,regulation of complement activation|GO:0036066,protein O-linked fucosylation|GO:0042742,defense response to bacterium|GO:0043312,neutrophil degranulation	GO:0005515,protein binding	GO:0005576,extracellular region|GO:0005615,extracellular space|GO:0005788,endoplasmic reticulum lumen|GO:0031012,extracellular matrix|GO:0035580,specific granule lumen|GO:1904724,tertiary granule lumen	path:hsa05168 Herpes simplex infection - Homo sapiens (human)
AAAS	1950.95	1808.45	1591.29	1985.8	1362.99	1790.19	1740.91	1491.58	1658.9	2190.33	1430.11	1451.1	1818.76	1873.9	1316.86	1520.29	1618.32	1647.04	1370.91	1478.44	1757.14	1552.57	1654.86	-0.178408	0.0936191	-1.90568	0.0566916	0.172706	Not DEG	GO:0006110,regulation of glycolytic process|GO:0006406,mRNA export from nucleus|GO:0006409,tRNA export from nucleus|GO:0006913,nucleocytoplasmic transport|GO:0007077,mitotic nuclear envelope disassembly|GO:0007612,learning|GO:0009566,fertilization|GO:0016032,viral process|GO:0016925,protein sumoylation|GO:0019083,viral transcription|GO:0046822,regulation of nucleocytoplasmic transport|GO:0060964,…	GO:0003674,molecular_function	GO:0005634,nucleus|GO:0005635,nuclear envelope|GO:0005643,nuclear pore|GO:0005643,nuclear pore|GO:0005654,nucleoplasm|GO:0005813,centrosome|GO:0005829,cytosol|GO:0016020,membrane|GO:0031965,nuclear membrane|GO:0043657,host cell	path:hsa03013 RNA transport - Homo sapiens (human)
HAMP	8.80127	0	5.04371	0	9.39993	0	19.0524	11.0396	9.90881	5.46216	6.00384	0	7.40085	0	0	0	10.2282	8.65726	7.78294	0	6.87079	4.00731	5.43905	-0.776995	1.10575	-0.702688	0.48225	0.684227	Not DEG	GO:0000122,negative regulation of transcription from RNA polymerase II promoter|GO:0006879,cellular iron ion homeostasis|GO:0006953,acute-phase response|GO:0006955,immune response|GO:0007568,aging|GO:0010039,response to iron ion|GO:0010043,response to zinc ion|GO:0010469,regulation of receptor activity|GO:0031640,killing of cells of other organism|GO:0033189,response to vitamin A|GO:0034760,negat…	GO:0005179,hormone activity	GO:0005576,extracellular region|GO:0005615,extracellular space|GO:0014704,intercalated disc|GO:0045179,apical cortex
ACAD11	2716.66	2531.49	2829.52	2379.32	3459.18	3363.06	3803.34	3554.76	2911.54	3270.92	2770.17	2691.23	3124.08	3181.05	3120.38	3688.21	4475.39	3848.15	3017.56	3664.19	3081.98	3358.04	3220.01	0.123937	0.110476	1.12185	0.261927	0.474508	Not DEG	GO:0006635,fatty acid beta-oxidation|GO:0033539,fatty acid beta-oxidation using acyl-CoA dehydrogenase	GO:0003995,acyl-CoA dehydrogenase activity|GO:0004466,long-chain-acyl-CoA dehydrogenase activity|GO:0017099,very-long-chain-acyl-CoA dehydrogenase activity|GO:0050660,flavin adenine dinucleotide binding|GO:0070991,medium-chain-acyl-CoA dehydrogenase activity	GO:0005634,nucleus|GO:0005743,mitochondrial inner membrane|GO:0005777,peroxisome|GO:0031966,mitochondrial membrane
LAP3	5578.05	3207.07	4546.06	4034.15	4584.82	3691.17	3073.39	3066.56	5827.21	3530.38	6256	3827.29	4700.47	4132.13	4353.56	3318.7	3440.07	4308.07	6910.14	4983.64	4113.89	4623.01	4368.45	0.168185	0.159101	1.0571	0.290467	0.505139	Not DEG	GO:0006508,proteolysis	GO:0004177,aminopeptidase activity|GO:0008235,metalloexopeptidase activity|GO:0030145,manganese ion binding	GO:0005634,nucleus|GO:0005654,nucleoplasm|GO:0005739,mitochondrion|GO:0005802,trans-Golgi network|GO:0005829,cytosol|GO:0005925,focal adhesion|GO:0030496,midbody|GO:0070062,extracellular exosome	path:hsa00330 Arginine and proline metabolism - Homo sapiens (human)|path:hsa00480 Glutathione metabolism - Homo sapiens (human)|path:hsa01100 Metabolic pathways - Homo sapiens (human)
SIDT1	358.896	55.2199	615.332	128.565	223.248	92.1734	198.86	142.288	1071.8	134.733	228.146	210.028	147.092	166.255	275.263	268.287	310.255	389.577	962.861	236.601	302.112	319.436	310.774	0.0796835	0.456918	0.174393	0.861556	0.931261	Not DEG	GO:0033227,dsRNA transport	GO:0003723,RNA binding|GO:0051033,RNA transmembrane transporter activity	GO:0016021,integral component of membrane
SERPINA10	140.82	157.032	176.53	169.393	234.998	171.662	233.392	253.911	99.0881	146.568	128.482	104.059	152.643	105.676	200.392	186.72	204.563	177.474	201.245	191.534	178.339	165.279	171.809	-0.108741	0.185837	-0.585143	0.558451	0.742887	Not DEG	GO:0007596,blood coagulation|GO:0008218,bioluminescence|GO:0010951,negative regulation of endopeptidase activity|GO:0043687,post-translational protein modification|GO:0044267,cellular protein metabolic process|GO:0060046,regulation of acrosome reaction	GO:0004867,serine-type endopeptidase inhibitor activity|GO:0008201,heparin binding	GO:0005615,extracellular space|GO:0005788,endoplasmic reticulum lumen|GO:0070062,extracellular exosome
SIDT2	3916.57	3383.08	4140.04	3962.05	3482.68	3442.55	4819.07	4765.43	4376.39	4476.24	2898.65	2675.95	3705.05	2756.32	3071.94	2937.4	3096.86	4887.02	3500.1	3586.57	4076.41	3311.59	3694	-0.299806	0.112151	-2.67323	0.00751246	0.042558	Not DEG	GO:0000902,cell morphogenesis|GO:0003323,type B pancreatic cell development|GO:0006401,RNA catabolic process|GO:0009749,response to glucose|GO:0033227,dsRNA transport|GO:0042593,glucose homeostasis|GO:0044342,type B pancreatic cell proliferation|GO:0050658,RNA transport|GO:0061178,regulation of insulin secretion involved in cellular response to glucose stimulus	GO:0003677,DNA binding|GO:0003725,double-stranded RNA binding|GO:0035612,AP-2 adaptor complex binding|GO:0035650,AP-1 adaptor complex binding|GO:0051032,nucleic acid transmembrane transporter activity|GO:0051033,RNA transmembrane transporter activity	GO:0005764,lysosome|GO:0005765,lysosomal membrane|GO:0005886,plasma membrane|GO:0016021,integral component of membrane
PYY	12.713	8.62811	12.6093	14.7676	14.0999	10.9932	36.9141	17.1727	2.4772	20.0279	0	6.68272	7.40085	2.69238	9.90948	19.6547	20.4563	7.5751	18.9014	6.25929	15.0403	9.95323	12.4968	-0.59154	0.505166	-1.17098	0.241606	0.450312	Not DEG	GO:0006928,movement of cell or subcellular component|GO:0007010,cytoskeleton organization|GO:0007186,G-protein coupled receptor signaling pathway|GO:0007218,neuropeptide signaling pathway|GO:0007267,cell-cell signaling|GO:0007586,digestion|GO:0007631,feeding behavior|GO:0008283,cell proliferation|GO:0010469,regulation of receptor activity|GO:0032098,regulation of appetite	GO:0001664,G-protein coupled receptor binding|GO:0005179,hormone activity|GO:0005184,neuropeptide hormone activity|GO:0005515,protein binding	GO:0005576,extracellular region|GO:0005615,extracellular space
SIX4	667.919	576.358	546.402	512.521	478.222	867.614	633.493	870.903	431.859	709.17	1619.84	781.878	526.386	795.598	791.657	881.513	1656.96	726.128	992.881	484.469	629.446	925.731	777.589	0.55641	0.218127	2.55085	0.0107459	0.0545097	Not DEG	GO:0006366,transcription from RNA polymerase II promoter|GO:0007519,skeletal muscle tissue development|GO:0008582,regulation of synaptic growth at neuromuscular junction|GO:0008584,male gonad development|GO:0009653,anatomical structure morphogenesis|GO:0030238,male sex determination|GO:0030910,olfactory placode formation|GO:0032880,regulation of protein localization|GO:0034504,protein localizatio…	GO:0000978,RNA polymerase II proximal promoter sequence-specific DNA binding|GO:0001077,transcriptional activator activity, RNA polymerase II proximal promoter sequence-specific DNA binding	GO:0005634,nucleus|GO:0005737,cytoplasm	path:hsa05202 Transcriptional misregulation in cancer - Homo sapiens (human)
SIX5	1349.53	1465.92	1373.57	1784.27	798.994	1323.41	1178.87	1140.76	902.528	1667.78	718.059	1041.55	1293.3	922.813	801.566	1053.49	1031.91	1074.58	824.992	1132.93	1298.56	989.519	1144.04	-0.392338	0.145725	-2.69231	0.00709593	0.04085	Not DEG	GO:0002088,lens development in camera-type eye|GO:0006351,transcription, DNA-templated|GO:0007286,spermatid development|GO:0045892,negative regulation of transcription, DNA-templated|GO:0045944,positive regulation of transcription from RNA polymerase II promoter|GO:1902723,negative regulation of skeletal muscle satellite cell proliferation	GO:0000978,RNA polymerase II proximal promoter sequence-specific DNA binding|GO:0005515,protein binding	GO:0005634,nucleus|GO:0005737,cytoplasm
SIX6	0	7.7653	0	0	9.39993	0	0	9.81299	6.60587	0	8.40537	0	2.77532	0	0	11.7928	5.68232	4.32863	8.89479	0	3.35841	4.18793	3.77317	0.3227	1.35652	0.237888	0.811968	NA	Not DEG	GO:0001654,eye development|GO:0006366,transcription from RNA polymerase II promoter|GO:0007601,visual perception|GO:0009887,animal organ morphogenesis|GO:0045944,positive regulation of transcription from RNA polymerase II promoter	GO:0001205,transcriptional activator activity, RNA polymerase II distal enhancer sequence-specific DNA binding|GO:0003677,DNA binding	GO:0005634,nucleus
PSMB10	647.383	287.316	650.638	600.258	468.822	369.539	366.759	399.879	823.257	417.855	516.33	459.198	605.945	491.359	487.766	319.389	273.888	565.968	898.374	534.543	503.171	515.276	509.223	0.0337047	0.214345	0.157245	0.875051	0.93824	Not DEG	GO:0000165,MAPK cascade|GO:0000209,protein polyubiquitination|GO:0002223,stimulatory C-type lectin receptor signaling pathway|GO:0002479,antigen processing and presentation of exogenous peptide antigen via MHC class I, TAP-dependent|GO:0006521,regulation of cellular amino acid metabolic process|GO:0006959,humoral immune response|GO:0010972,negative regulation of G2/M transition of mitotic cell cy…	GO:0004298,threonine-type endopeptidase activity|GO:0005515,protein binding	GO:0000502,proteasome complex|GO:0005654,nucleoplasm|GO:0005829,cytosol|GO:0005839,proteasome core complex|GO:0019774,proteasome core complex, beta-subunit complex|GO:1990111,spermatoproteasome complex	path:hsa03050 Proteasome - Homo sapiens (human)
SAGE1	3.91168	0	0	0	0	1.69126	2.38155	0	0	0	0	0	0	0	0	0	2.27293	0	7.78294	5.00743	0.798449	1.50633	1.15239	0.911495	2.11344	0.431285	0.666261	NA	Not DEG
MR1	2466.31	3048.31	4604.91	2167.36	2849.35	1999.06	4854.79	3970.58	1726.61	1943.62	6843.18	3237.3	2194.35	2262.95	1969.78	2054.9	2100.18	1796.38	2576.15	6512.16	2963.09	3154.73	3058.91	0.0903742	0.281532	0.321009	0.748203	0.868326	Not DEG	GO:0002367,cytokine production involved in immune response|GO:0002474,antigen processing and presentation of peptide antigen via MHC class I|GO:0006955,immune response|GO:0007165,signal transduction|GO:0032611,interleukin-1 beta production|GO:0032620,interleukin-17 production|GO:0045087,innate immune response|GO:0050829,defense response to Gram-negative bacterium	GO:0005515,protein binding|GO:0032393,MHC class I receptor activity	GO:0005576,extracellular region|GO:0005783,endoplasmic reticulum|GO:0005789,endoplasmic reticulum membrane|GO:0005886,plasma membrane|GO:0005886,plasma membrane|GO:0016021,integral component of membrane|GO:0042612,MHC class I protein complex
SIX2	11.735	25.8843	5.04371	20.8483	0	23.6776	9.52621	49.065	9.90881	3.64144	57.6369	16.2295	4.62553	27.5969	13.2126	21.6202	18.1834	103.887	5.55924	5.00743	15.933	27.3559	21.6445	0.781441	0.645126	1.2113	0.225781	0.430683	Not DEG	GO:0001822,kidney development|GO:0001822,kidney development|GO:0002062,chondrocyte differentiation|GO:0003337,mesenchymal to epithelial transition involved in metanephros morphogenesis|GO:0006366,transcription from RNA polymerase II promoter|GO:0006606,protein import into nucleus|GO:0007501,mesodermal cell fate specification|GO:0008283,cell proliferation|GO:0009653,anatomical structure morphogene…	GO:0000978,RNA polymerase II proximal promoter sequence-specific DNA binding|GO:0001077,transcriptional activator activity, RNA polymerase II proximal promoter sequence-specific DNA binding|GO:0003700,DNA binding transcription factor activity|GO:0008134,transcription factor binding|GO:0032403,protein complex binding	GO:0005634,nucleus
SIX3	0	2.58843	0	4.3434	0	0	0	0	0	0	0	0	0	0	4.40421	3.93094	21.5928	0	8.89479	0	0.693184	3.88227	2.28773	2.46246	2.02902	1.21362	0.224893	NA	Not DEG	GO:0000060,protein import into nucleus, translocation|GO:0001654,eye development|GO:0002070,epithelial cell maturation|GO:0002088,lens development in camera-type eye|GO:0003404,optic vesicle morphogenesis|GO:0006366,transcription from RNA polymerase II promoter|GO:0007420,brain development|GO:0007601,visual perception|GO:0009946,proximal/distal axis specification|GO:0014016,neuroblast differentia…	GO:0000980,RNA polymerase II distal enhancer sequence-specific DNA binding|GO:0001205,transcriptional activator activity, RNA polymerase II distal enhancer sequence-specific DNA binding|GO:0001222,transcription corepressor binding|GO:0003700,DNA binding transcription factor activity|GO:0003713,transcription coactivator activity|GO:0005102,receptor binding|GO:0005515,protein binding|GO:0042826,his…	GO:0005634,nucleus
CNPY4	648.361	668.679	837.256	865.205	508.771	731.468	891.891	507.822	599.483	883.96	531.94	808.609	616.121	596.362	586.861	859.893	754.612	812.7	762.728	787.418	714.29	711.724	713.007	-0.00589442	0.133711	-0.0440833	0.964838	0.983068	Not DEG	GO:1903078,positive regulation of protein localization to plasma membrane	GO:0003674,molecular_function|GO:0005102,receptor binding	GO:0005576,extracellular region
CNPY3	2300.07	2163.07	2433.59	2382.79	2628.46	2289.96	2096.96	1707.46	2867.78	2132.06	2145.77	2502.2	3109.28	1896.11	2066.68	2058.83	2711.6	3191.28	3723.58	4005.94	2300.22	2741.13	2520.67	0.252671	0.143603	1.75951	0.0784917	0.214934	Not DEG	GO:0002224,toll-like receptor signaling pathway|GO:0045087,innate immune response	GO:0005102,receptor binding	GO:0005788,endoplasmic reticulum lumen
CNPY2	1949.97	2571.18	2811.87	3313.15	2522.71	2377.91	2667.34	1917.21	2080.02	3177.16	1904.42	2441.1	3257.3	2348.43	2507.1	1999.87	2675.23	1929.49	2261.5	2963.15	2538.85	2428.76	2483.8	-0.0640657	0.127042	-0.504288	0.614059	0.78089	Not DEG	GO:0007167,enzyme linked receptor protein signaling pathway|GO:0009888,tissue development|GO:0010629,negative regulation of gene expression|GO:0010988,regulation of low-density lipoprotein particle clearance|GO:0045716,positive regulation of low-density lipoprotein particle receptor biosynthetic process	GO:0005515,protein binding	GO:0005783,endoplasmic reticulum|GO:0005887,integral component of plasma membrane
CNPY1	0	0	0	0	0	2.53688	0	0	0	0	0	0	0	0	0	0	0	0	0	5.00743	0.253688	0.500743	0.377216	0.418748	3.02466	0.138445	0.889889	NA	Not DEG	GO:0007167,enzyme linked receptor protein signaling pathway|GO:0009888,tissue development		GO:0005783,endoplasmic reticulum
PLCZ1	0	4.31406	0	0	0	0	0	6.13312	0	0	0	2.86402	1.85021	5.38476	0	4.91368	20.4563	4.32863	26.6844	10.0149	1.04472	7.64969	4.3472	2.90333	1.26649	2.29242	0.0218817	0.0893628	Up	GO:0006816,calcium ion transport|GO:0007275,multicellular organism development|GO:0007343,egg activation|GO:0016042,lipid catabolic process|GO:0035556,intracellular signal transduction|GO:0043647,inositol phosphate metabolic process	GO:0004435,phosphatidylinositol phospholipase C activity|GO:0004871,signal transducer activity|GO:0005509,calcium ion binding	GO:0005634,nucleus|GO:0005829,cytosol|GO:0048471,perinuclear region of cytoplasm	path:hsa00562 Inositol phosphate metabolism - Homo sapiens (human)|path:hsa01100 Metabolic pathways - Homo sapiens (human)|path:hsa04020 Calcium signaling pathway - Homo sapiens (human)|path:hsa04070 Phosphatidylinositol signaling system - Homo sapiens (human)|path:hsa04114 Oocyte meiosis - Homo sapiens (human)|path:hsa04919 Thyroid hormone signaling pathway - Homo sapiens (human)
UFD1	1420.92	1880.93	1669.47	2188.21	2725.98	1824.02	1583.73	1576.21	2163.42	2073.8	1426.51	1686.91	2392.33	1685.43	2232.94	1521.27	1663.78	1657.87	1708.91	1549.8	1910.67	1752.57	1831.62	-0.12449	0.12643	-0.98466	0.324791	0.540165	Not DEG	GO:0001501,skeletal system development|GO:0006511,ubiquitin-dependent protein catabolic process|GO:0016579,protein deubiquitination|GO:0030970,retrograde protein transport, ER to cytosol|GO:0032480,negative regulation of type I interferon production|GO:0039536,negative regulation of RIG-I signaling pathway|GO:0043161,proteasome-mediated ubiquitin-dependent protein catabolic process|GO:0070987,err…	GO:0004843,thiol-dependent ubiquitin-specific protease activity|GO:0005102,receptor binding|GO:0005515,protein binding|GO:0032403,protein complex binding|GO:0036435,K48-linked polyubiquitin modification-dependent protein binding|GO:0051117,ATPase binding	GO:0005634,nucleus|GO:0005654,nucleoplasm|GO:0005783,endoplasmic reticulum|GO:0005829,cytosol|GO:0034098,VCP-NPL4-UFD1 AAA ATPase complex|GO:0034098,VCP-NPL4-UFD1 AAA ATPase complex|GO:0036501,UFD1-NPL4 complex	path:hsa04141 Protein processing in endoplasmic reticulum - Homo sapiens (human)
SYNJ1	3871.58	3948.23	4119.03	3234.1	2529.76	4034.49	4922.67	3966.9	3835.54	4488.07	4303.55	4096.5	4410.91	3314.32	4372.28	4473.41	6031.21	3658.77	4598.61	4116.11	3895.04	4337.57	4116.3	0.155121	0.116186	1.33511	0.181839	0.374261	Not DEG	GO:0006661,phosphatidylinositol biosynthetic process|GO:0006836,neurotransmitter transport|GO:0007612,learning|GO:0016082,synaptic vesicle priming|GO:0016191,synaptic vesicle uncoating|GO:0036092,phosphatidylinositol-3-phosphate biosynthetic process|GO:0043647,inositol phosphate metabolic process|GO:0046488,phosphatidylinositol metabolic process|GO:0046855,inositol phosphate dephosphorylation|GO:…	GO:0003723,RNA binding|GO:0004438,phosphatidylinositol-3-phosphatase activity|GO:0004438,phosphatidylinositol-3-phosphatase activity|GO:0004439,phosphatidylinositol-4,5-bisphosphate 5-phosphatase activity|GO:0004439,phosphatidylinositol-4,5-bisphosphate 5-phosphatase activity|GO:0004439,phosphatidylinositol-4,5-bisphosphate 5-phosphatase activity|GO:0004439,phosphatidylinositol-4,5-bisphosphate 5…	GO:0005829,cytosol|GO:0005829,cytosol|GO:0005874,microtubule|GO:0012506,vesicle membrane|GO:0030117,membrane coat|GO:0030132,clathrin coat of coated pit|GO:0043195,terminal bouton|GO:0048471,perinuclear region of cytoplasm|GO:0097060,synaptic membrane|GO:0098793,presynapse	path:hsa00562 Inositol phosphate metabolism - Homo sapiens (human)|path:hsa01100 Metabolic pathways - Homo sapiens (human)|path:hsa04070 Phosphatidylinositol signaling system - Homo sapiens (human)
KNDC1	975.963	553.062	645.595	919.932	474.697	816.031	714.466	999.699	405.436	876.677	619.596	777.104	550.438	346.644	458.038	541.487	723.927	1192.54	323.548	1402.08	738.156	693.54	715.848	-0.0903628	0.256384	-0.352451	0.7245	0.854078	Not DEG	GO:0001934,positive regulation of protein phosphorylation|GO:0007264,small GTPase mediated signal transduction|GO:0008150,biological_process|GO:0021707,cerebellar granule cell differentiation|GO:0048814,regulation of dendrite morphogenesis|GO:0050773,regulation of dendrite development|GO:0065009,regulation of molecular function	GO:0003674,molecular_function|GO:0005088,Ras guanyl-nucleotide exchange factor activity	GO:0005575,cellular_component|GO:0030425,dendrite|GO:0032045,guanyl-nucleotide exchange factor complex|GO:0043025,neuronal cell body|GO:0043204,perikaryon
HMG20A	3536.16	2959.44	2642.9	3396.54	2626.11	3018.05	3313.93	2994.19	3487.9	3036.05	3626.32	3263.07	2639.33	2751.61	2645.83	3036.65	3435.53	3028.96	3804.75	3301.15	3101.13	3153.32	3127.22	0.0237294	0.0854915	0.277565	0.781347	0.888256	Not DEG	GO:0000122,negative regulation of transcription from RNA polymerase II promoter|GO:0006325,chromatin organization|GO:0006351,transcription, DNA-templated|GO:0006355,regulation of transcription, DNA-templated|GO:0016569,covalent chromatin modification|GO:0033234,negative regulation of protein sumoylation|GO:0045665,negative regulation of neuron differentiation	GO:0003677,DNA binding|GO:0003700,DNA binding transcription factor activity|GO:0005515,protein binding|GO:0042802,identical protein binding|GO:0046982,protein heterodimerization activity	GO:0005634,nucleus
HMG20B	1993	2005.17	2220.07	2574.77	1756.61	2002.45	1796.88	1777.38	2203.88	2155.73	1689.48	1887.39	2633.78	1649.08	1666.99	1411.21	1943.35	2125.36	2160.32	2667.71	2048.59	1983.47	2016.03	-0.0470949	0.118228	-0.398339	0.69038	0.832059	Not DEG	GO:0006351,transcription, DNA-templated|GO:0006355,regulation of transcription, DNA-templated|GO:0007049,cell cycle|GO:0007596,blood coagulation|GO:0016575,histone deacetylation|GO:0033234,negative regulation of protein sumoylation|GO:0035914,skeletal muscle cell differentiation|GO:0045666,positive regulation of neuron differentiation	GO:0003677,DNA binding|GO:0004407,histone deacetylase activity|GO:0005515,protein binding|GO:0046982,protein heterodimerization activity	GO:0005654,nucleoplasm|GO:0005654,nucleoplasm|GO:0005694,chromosome|GO:0016604,nuclear body
PHOSPHO2	821.452	748.92	612.811	463.007	729.67	711.173	857.359	959.22	640.77	812.951	571.565	567.076	624.447	643.479	803.769	889.375	936.446	489.135	671.556	419.372	735.733	661.622	698.678	-0.152363	0.15504	-0.982731	0.32574	0.541275	Not DEG	GO:0016311,dephosphorylation	GO:0005515,protein binding|GO:0016791,phosphatase activity|GO:0033883,pyridoxal phosphatase activity|GO:0046872,metal ion binding		path:hsa00750 Vitamin B6 metabolism - Homo sapiens (human)|path:hsa01100 Metabolic pathways - Homo sapiens (human)
AAGAB	3181.17	3826.57	3939.98	3128.99	4887.97	4049.71	3609.24	3917.84	3647.27	3973.72	3830.45	3403.41	4106.55	2170.73	2128.34	3728.5	3237.78	2742.19	1434.28	3569.04	3816.25	3035.13	3425.69	-0.33041	0.161184	-2.04989	0.0403753	0.136539	Not DEG	GO:0015031,protein transport	GO:0005515,protein binding	GO:0005737,cytoplasm|GO:0005829,cytosol|GO:0016607,nuclear speck
FBXO6	372.587	218.291	349.697	201.534	191.524	189.421	159.564	132.475	289.007	239.425	355.427	231.986	419.073	201.929	267.556	215.219	229.566	192.624	254.613	321.727	234.352	268.972	251.662	0.196463	0.20107	0.977089	0.328525	0.544442	Not DEG	GO:0000077,DNA damage checkpoint|GO:0000209,protein polyubiquitination|GO:0006281,DNA repair|GO:0006508,proteolysis|GO:0006516,glycoprotein catabolic process|GO:0006986,response to unfolded protein|GO:0030433,ubiquitin-dependent ERAD pathway|GO:0031146,SCF-dependent proteasomal ubiquitin-dependent protein catabolic process|GO:0043687,post-translational protein modification	GO:0004842,ubiquitin-protein transferase activity|GO:0004842,ubiquitin-protein transferase activity|GO:0005515,protein binding|GO:0030246,carbohydrate binding|GO:0061630,ubiquitin protein ligase activity	GO:0005737,cytoplasm|GO:0005829,cytosol|GO:0019005,SCF ubiquitin ligase complex|GO:0044322,endoplasmic reticulum quality control compartment	path:hsa04141 Protein processing in endoplasmic reticulum - Homo sapiens (human)
C4orf19	406.814	446.074	300.101	429.997	350.148	360.237	433.442	398.653	325.339	524.367	279.779	302.632	137.841	157.504	343.528	393.094	535.274	115.791	173.448	182.771	397.517	262.166	329.842	-0.601164	0.242343	-2.48063	0.0131149	0.0628644	Not DEG		GO:0005515,protein binding	GO:0005654,nucleoplasm|GO:0030054,cell junction
C3orf79	0	0	1.68124	0	0	0	5.95388	6.13312	1.65147	0	2.40154	0	0	1.34619	0	0	0	5.41079	2.2237	7.51114	1.54197	1.88934	1.71565	0.306323	1.48588	0.206155	0.83667	NA	Not DEG
SLC7A6OS	459.622	448.662	423.671	653.248	404.197	391.526	429.87	402.333	393.875	425.138	451.489	380.915	371.893	284.046	309.396	390.146	328.438	425.288	460.305	732.336	443.214	413.425	428.32	-0.10245	0.155149	-0.66033	0.509042	0.705529	Not DEG	GO:0002244,hematopoietic progenitor cell differentiation|GO:0015031,protein transport		GO:0005634,nucleus|GO:0005737,cytoplasm
H2BFS	12.713	2.58843	5.04371	5.21208	3.52498	11.8388	7.14466	0	18.9919	3.64144	8.40537	9.54674	4.62553	10.7695	8.80842	15.7238	5.68232	5.41079	11.1185	3.75557	7.06989	8.38465	7.72727	0.236506	0.495755	0.477062	0.633318	0.793732	Not DEG	GO:0002227,innate immune response in mucosa|GO:0006334,nucleosome assembly|GO:0019731,antibacterial humoral response|GO:0021762,substantia nigra development|GO:0050830,defense response to Gram-positive bacterium|GO:0061844,antimicrobial humoral immune response mediated by antimicrobial peptide	GO:0003677,DNA binding|GO:0046982,protein heterodimerization activity	GO:0000786,nucleosome|GO:0005615,extracellular space|GO:0005634,nucleus|GO:0005654,nucleoplasm|GO:0005829,cytosol
C4orf17	0	0	0	0	0	0	2.38155	0	0	0	0	0	3.70043	4.71167	0	0	2.27293	3.24647	0	5.00743	0.238155	1.89389	1.06602	2.84827	1.91056	1.4908	0.136013	NA	Not DEG
C3orf70	504.606	394.305	610.289	489.067	502.896	565.725	864.503	618.219	541.682	521.636	461.095	483.065	617.046	562.034	597.872	731.155	1046.68	979.353	478.095	384.32	561.293	634.072	597.682	0.176424	0.184775	0.954804	0.339677	0.556675	Not DEG
SHOX2	54.7635	9.49093	10.0874	54.7269	108.099	32.9795	46.4403	19.626	59.4529	17.2968	0	47.7337	58.2817	121.157	77.0737	40.2921	135.239	205.61	114.52	196.542	41.2963	99.6449	70.4706	1.27219	0.553679	2.29771	0.0215785	0.0884788	Up	GO:0000122,negative regulation of transcription from RNA polymerase II promoter|GO:0001501,skeletal system development|GO:0001649,osteoblast differentiation|GO:0002053,positive regulation of mesenchymal cell proliferation|GO:0002063,chondrocyte development|GO:0003170,heart valve development|GO:0003209,cardiac atrium morphogenesis|GO:0007399,nervous system development|GO:0007507,heart development|…	GO:0043565,sequence-specific DNA binding	GO:0005634,nucleus
ADCY7	1877.61	754.097	2045.22	1248.29	1709.61	1275.21	1587.3	1213.13	2807.5	1177.1	1857.59	1612.44	2027.83	1977.55	1664.79	1793.49	1967.22	3573.28	3954.85	3152.18	1569.51	2358.12	1963.81	0.587176	0.224527	2.61516	0.00891849	0.0477563	Not DEG	GO:0003091,renal water homeostasis|GO:0006171,cAMP biosynthetic process|GO:0006182,cGMP biosynthetic process|GO:0007165,signal transduction|GO:0007186,G-protein coupled receptor signaling pathway|GO:0007189,adenylate cyclase-activating G-protein coupled receptor signaling pathway|GO:0007190,activation of adenylate cyclase activity|GO:0007193,adenylate cyclase-inhibiting G-protein coupled receptor…	GO:0004016,adenylate cyclase activity|GO:0004383,guanylate cyclase activity|GO:0005524,ATP binding|GO:0046872,metal ion binding	GO:0005886,plasma membrane|GO:0005886,plasma membrane|GO:0005886,plasma membrane|GO:0008074,guanylate cyclase complex, soluble|GO:0016021,integral component of membrane	path:hsa00230 Purine metabolism - Homo sapiens (human)|path:hsa01522 Endocrine resistance - Homo sapiens (human)|path:hsa04015 Rap1 signaling pathway - Homo sapiens (human)|path:hsa04020 Calcium signaling pathway - Homo sapiens (human)|path:hsa04022 cGMP-PKG signaling pathway - Homo sapiens (human)|path:hsa04024 cAMP signaling pathway - Homo sapiens (human)|path:hsa04062 Chemokine signaling pathw…
ECEL1	18.5805	0	10.928	59.9389	4.69997	27.9057	21.434	25.7591	15.689	29.1315	45.6292	11.4561	30.5285	40.3857	18.7179	32.4303	86.3712	63.8473	76.7175	56.3336	21.4067	46.2417	33.8242	1.10792	0.502314	2.20564	0.0274095	0.104454	Up	GO:0003016,respiratory system process|GO:0006508,proteolysis|GO:0007218,neuropeptide signaling pathway	GO:0004222,metalloendopeptidase activity|GO:0008237,metallopeptidase activity|GO:0046872,metal ion binding	GO:0005887,integral component of plasma membrane
NLRP10	0	4.31406	0	0	5.87496	0	0	0	0	0	4.80307	0	33.3038	12.7888	0	0	5.68232	0	8.89479	8.763	1.0189	7.42358	4.22124	2.88322	1.56958	1.83693	0.0662195	0.191689	Not DEG	GO:0002250,adaptive immune response|GO:0002827,positive regulation of T-helper 1 type immune response|GO:0006954,inflammatory response|GO:0045087,innate immune response|GO:0050717,positive regulation of interleukin-1 alpha secretion|GO:0050729,positive regulation of inflammatory response|GO:0050829,defense response to Gram-negative bacterium|GO:0050832,defense response to fungus|GO:1900426,positi…	GO:0003924,GTPase activity|GO:0005524,ATP binding|GO:0016887,ATPase activity	GO:0005737,cytoplasm|GO:0019897,extrinsic component of plasma membrane
CHFR	1484.48	1113.03	1586.25	1273.49	1964.59	1348.78	1328.91	1815.4	1792.67	1258.12	1307.64	1295.49	1757.7	1436.39	1622.95	1214.66	1760.38	2286.6	1681.11	1962.91	1496.57	1632.58	1564.58	0.125555	0.13338	0.941336	0.346533	0.563127	Not DEG	GO:0000209,protein polyubiquitination|GO:0006511,ubiquitin-dependent protein catabolic process|GO:0007093,mitotic cell cycle checkpoint|GO:0007093,mitotic cell cycle checkpoint|GO:0019941,modification-dependent protein catabolic process|GO:0031398,positive regulation of protein ubiquitination|GO:0031648,protein destabilization|GO:0032436,positive regulation of proteasomal ubiquitin-dependent prot…	GO:0000166,nucleotide binding|GO:0004842,ubiquitin-protein transferase activity|GO:0005515,protein binding|GO:0046872,metal ion binding|GO:0061630,ubiquitin protein ligase activity	GO:0005634,nucleus|GO:0016605,PML body
KRAS	5301.3	5743.74	5793.54	3591.12	7830.14	5728.28	5603.79	6258.24	5359.02	5379.32	6455.33	5660.26	4735.62	6337.19	9023.13	6496.86	6615.35	4839.41	5977.3	5469.36	5658.85	6160.98	5909.92	0.122728	0.12811	0.957995	0.338065	0.555102	Not DEG	GO:0000165,MAPK cascade|GO:0001889,liver development|GO:0001934,positive regulation of protein phosphorylation|GO:0002223,stimulatory C-type lectin receptor signaling pathway|GO:0007173,epidermal growth factor receptor signaling pathway|GO:0007265,Ras protein signal transduction|GO:0007411,axon guidance|GO:0007565,female pregnancy|GO:0008284,positive regulation of cell proliferation|GO:0008542,vi…	GO:0003924,GTPase activity|GO:0005515,protein binding|GO:0005525,GTP binding|GO:0019002,GMP binding|GO:0019003,GDP binding|GO:0030275,LRR domain binding|GO:0032403,protein complex binding	GO:0005737,cytoplasm|GO:0005739,mitochondrion|GO:0005829,cytosol|GO:0005886,plasma membrane|GO:0005925,focal adhesion|GO:0016020,membrane|GO:0031234,extrinsic component of cytoplasmic side of plasma membrane|GO:0045121,membrane raft	path:hsa01521 EGFR tyrosine kinase inhibitor resistance - Homo sapiens (human)|path:hsa01522 Endocrine resistance - Homo sapiens (human)|path:hsa04010 MAPK signaling pathway - Homo sapiens (human)|path:hsa04012 ErbB signaling pathway - Homo sapiens (human)|path:hsa04014 Ras signaling pathway - Homo sapiens (human)|path:hsa04015 Rap1 signaling pathway - Homo sapiens (human)|path:hsa04062 Chemokine…
SYPL1	1917.7	10823.1	3702.92	5865.33	8122.72	2716.16	10436	10351.5	2220.4	11334.9	1763.93	7776.77	5842.05	8766.39	2337.54	13689.5	9882.69	5892.35	9052.67	5468.11	6749.07	7047.2	6898.13	0.0624088	0.370134	0.168611	0.866102	0.933439	Not DEG	GO:0006810,transport|GO:0007268,chemical synaptic transmission	GO:0005215,transporter activity	GO:0005887,integral component of plasma membrane|GO:0016021,integral component of membrane|GO:0030141,secretory granule|GO:0030285,integral component of synaptic vesicle membrane|GO:0042470,melanosome|GO:0070062,extracellular exosome
FAM81A	115.394	88.0068	98.3523	59.0703	163.324	458.33	170.281	125.116	149.458	118.347	117.675	65.8725	199.823	90.8678	212.503	332.165	136.376	93.0656	177.896	181.519	154.568	160.776	157.672	0.056191	0.339185	0.165665	0.868421	0.935006	Not DEG
SYPL2	1013.12	1616.05	1121.38	1288.25	1405.29	1747.91	1425.36	1713.59	1118.04	1675.97	2489.19	956.583	1057.4	1229.07	1065.82	1415.14	719.381	536.75	259.061	1155.46	1412.5	1088.39	1250.44	-0.376066	0.265872	-1.41446	0.157226	0.339238	Not DEG	GO:0006810,transport|GO:0006874,cellular calcium ion homeostasis|GO:0021762,substantia nigra development	GO:0005215,transporter activity	GO:0030285,integral component of synaptic vesicle membrane
RFX8	38.1389	5.17687	15.9717	12.1615	3.52498	27.9057	15.4801	13.4929	13.2117	38.2351	38.4246	55.3711	32.3787	74.0405	52.8505	30.4648	130.693	122.284	28.9081	127.689	18.33	69.3105	43.8202	1.91391	0.424878	4.50461	6.64942e-06	0.00019463	Up	GO:0006351,transcription, DNA-templated|GO:0006357,regulation of transcription from RNA polymerase II promoter	GO:0000978,RNA polymerase II proximal promoter sequence-specific DNA binding|GO:0003700,DNA binding transcription factor activity	GO:0005634,nucleus
RCOR2	43.0285	34.5125	62.2057	108.585	78.7244	71.0327	142.893	62.5578	53.6727	89.2153	25.2161	44.8697	49.9557	43.7512	73.7705	101.222	92.0535	94.1477	83.3886	57.5854	74.6428	66.596	70.6194	-0.163411	0.284152	-0.575085	0.565234	0.748405	Not DEG	GO:0000122,negative regulation of transcription from RNA polymerase II promoter|GO:0006351,transcription, DNA-templated	GO:0003700,DNA binding transcription factor activity|GO:0003714,transcription corepressor activity|GO:0008134,transcription factor binding|GO:0019899,enzyme binding|GO:0044212,transcription regulatory region DNA binding	GO:0005634,nucleus|GO:0005667,transcription factor complex|GO:0017053,transcriptional repressor complex
RFX4	77.2556	56.9456	29.4216	29.5351	29.3748	82.0259	50.0126	45.3851	21.4691	71.9184	26.4169	45.8243	54.5813	9.42333	20.92	85.498	47.7315	18.3967	38.9147	16.2741	49.3344	36.3981	42.8662	-0.438576	0.373222	-1.17511	0.239951	0.448482	Not DEG	GO:0006366,transcription from RNA polymerase II promoter|GO:0021516,dorsal spinal cord development|GO:0021537,telencephalon development|GO:0021696,cerebellar cortex morphogenesis|GO:0021914,negative regulation of smoothened signaling pathway involved in ventral spinal cord patterning|GO:0030901,midbrain development|GO:0045944,positive regulation of transcription from RNA polymerase II promoter|GO…	GO:0000978,RNA polymerase II proximal promoter sequence-specific DNA binding|GO:0001077,transcriptional activator activity, RNA polymerase II proximal promoter sequence-specific DNA binding|GO:0003682,chromatin binding|GO:0005515,protein binding	GO:0005634,nucleus
TPSD1	0	0	0	0	0	4.22814	0	0	8.25734	0	3.6023	0	5.55064	4.71167	5.50526	0	7.95524	0	3.33555	5.00743	1.24855	3.56681	2.40768	1.48171	1.40467	1.05485	0.291493	NA	Not DEG	GO:0006508,proteolysis	GO:0004252,serine-type endopeptidase activity|GO:0008236,serine-type peptidase activity	GO:0005576,extracellular region
APP	103322	105147	76657.6	112045	73046.9	102946	88897.4	79177.4	71038.7	92084.7	57031.7	92062	75193.6	82279.2	71473.7	93170.2	61288.3	79499.6	45041	67849.4	90436.3	72488.9	81462.6	-0.319137	0.132255	-2.41304	0.0158199	0.0713652	Not DEG	GO:0001934,positive regulation of protein phosphorylation|GO:0001934,positive regulation of protein phosphorylation|GO:0001967,suckling behavior|GO:0002265,astrocyte activation involved in immune response|GO:0002576,platelet degranulation|GO:0006378,mRNA polyadenylation|GO:0006417,regulation of translation|GO:0006468,protein phosphorylation|GO:0006878,cellular copper ion homeostasis|GO:0006897,en…	GO:0003677,DNA binding|GO:0004867,serine-type endopeptidase inhibitor activity|GO:0005102,receptor binding|GO:0005515,protein binding|GO:0008201,heparin binding|GO:0016504,peptidase activator activity|GO:0019899,enzyme binding|GO:0042802,identical protein binding|GO:0046914,transition metal ion binding|GO:0051425,PTB domain binding|GO:0070851,growth factor receptor binding	GO:0005576,extracellular region|GO:0005615,extracellular space|GO:0005641,nuclear envelope lumen|GO:0005737,cytoplasm|GO:0005737,cytoplasm|GO:0005768,endosome|GO:0005788,endoplasmic reticulum lumen|GO:0005790,smooth endoplasmic reticulum|GO:0005791,rough endoplasmic reticulum|GO:0005794,Golgi apparatus|GO:0005794,Golgi apparatus|GO:0005796,Golgi lumen|GO:0005829,cytosol|GO:0005886,plasma membrane…	path:hsa04726 Serotonergic synapse - Homo sapiens (human)|path:hsa05010 Alzheimer's disease - Homo sapiens (human)
RFX7	6300.73	5134.59	4481.33	3665.83	5564.76	5847.52	6026.52	4729.86	6016.3	5284.64	8585.49	5610.62	5714.38	5746.21	5597.75	5748.02	6469.89	5174.88	7272.6	6207.96	5305.21	6212.78	5758.99	0.227774	0.110699	2.05759	0.0396294	0.134537	Not DEG	GO:0006357,regulation of transcription from RNA polymerase II promoter	GO:0000978,RNA polymerase II proximal promoter sequence-specific DNA binding|GO:0003700,DNA binding transcription factor activity	GO:0005634,nucleus
NRXN3	172.114	263.157	306.826	191.11	390.097	307.809	395.338	220.792	397.178	395.096	642.411	379.005	280.307	333.182	354.539	321.354	3015.04	1028.05	1297.53	668.492	303.952	831.991	567.971	1.45249	0.378281	3.83971	0.000123181	0.00196184	Up	GO:0007158,neuron cell-cell adhesion|GO:0007411,axon guidance|GO:0007612,learning|GO:0030534,adult behavior|GO:0035176,social behavior|GO:0071625,vocalization behavior	GO:0004872,receptor activity|GO:0046872,metal ion binding|GO:0050839,cell adhesion molecule binding|GO:0097109,neuroligin family protein binding	GO:0005886,plasma membrane|GO:0005887,integral component of plasma membrane	path:hsa04514 Cell adhesion molecules (CAMs) - Homo sapiens (human)
NRXN2	371.609	113.028	149.63	231.938	330.173	116.697	333.417	196.26	293.136	213.024	152.498	386.643	219.25	187.12	232.322	283.028	296.617	412.302	351.344	199.045	234.891	272.017	253.454	0.212803	0.246486	0.863344	0.387948	0.602849	Not DEG	GO:0007158,neuron cell-cell adhesion|GO:0007165,signal transduction|GO:0007268,chemical synaptic transmission|GO:0007269,neurotransmitter secretion|GO:0007416,synapse assembly|GO:0030534,adult behavior|GO:0035176,social behavior|GO:0042297,vocal learning|GO:0065009,regulation of molecular function|GO:0071625,vocalization behavior|GO:0097104,postsynaptic membrane assembly|GO:0097116,gephyrin clust…	GO:0004888,transmembrane signaling receptor activity|GO:0005246,calcium channel regulator activity|GO:0046872,metal ion binding|GO:0050839,cell adhesion molecule binding|GO:0097109,neuroligin family protein binding	GO:0005886,plasma membrane|GO:0016021,integral component of membrane|GO:0043234,protein complex|GO:0098793,presynapse	path:hsa04514 Cell adhesion molecules (CAMs) - Homo sapiens (human)
NRXN1	159.401	345.125	188.298	299.695	527.571	246.923	433.442	310.336	469.017	245.797	26.4169	331.272	2.77532	39.0395	628.701	326.268	114.783	203.446	143.428	72.6077	322.561	188.874	255.717	-0.772135	0.527145	-1.46475	0.142989	0.318187	Not DEG	GO:0007158,neuron cell-cell adhesion|GO:0007268,chemical synaptic transmission|GO:0007269,neurotransmitter secretion|GO:0007411,axon guidance|GO:0007416,synapse assembly|GO:0007612,learning|GO:0030534,adult behavior|GO:0035176,social behavior|GO:0042297,vocal learning|GO:0050885,neuromuscular process controlling balance|GO:0050885,neuromuscular process controlling balance|GO:0051965,positive regu…	GO:0004872,receptor activity|GO:0005246,calcium channel regulator activity|GO:0005509,calcium ion binding|GO:0005515,protein binding|GO:0033130,acetylcholine receptor binding|GO:0050839,cell adhesion molecule binding|GO:0097109,neuroligin family protein binding	GO:0005783,endoplasmic reticulum|GO:0005886,plasma membrane|GO:0005886,plasma membrane|GO:0005886,plasma membrane|GO:0005887,integral component of plasma membrane|GO:0009986,cell surface|GO:0030054,cell junction|GO:0031965,nuclear membrane|GO:0031982,vesicle|GO:0042734,presynaptic membrane|GO:0043025,neuronal cell body|GO:0043234,protein complex	path:hsa04514 Cell adhesion molecules (CAMs) - Homo sapiens (human)
RFX3	2656.03	4176.01	3421.32	2851.01	3469.75	3291.18	3125.79	4257.61	2722.45	1838.93	2419.55	2832.52	2244.31	2690.36	4326.04	4885.18	4231.05	2442.43	2093.61	1982.94	3181.01	3014.8	3097.9	-0.0773468	0.188442	-0.410455	0.681473	0.825946	Not DEG	GO:0003309,type B pancreatic cell differentiation|GO:0006351,transcription, DNA-templated|GO:0006355,regulation of transcription, DNA-templated|GO:0031018,endocrine pancreas development|GO:0045892,negative regulation of transcription, DNA-templated|GO:0045893,positive regulation of transcription, DNA-templated|GO:0045944,positive regulation of transcription from RNA polymerase II promoter|GO:0048…	GO:0000978,RNA polymerase II proximal promoter sequence-specific DNA binding|GO:0003677,DNA binding|GO:0003700,DNA binding transcription factor activity|GO:0003705,transcription factor activity, RNA polymerase II distal enhancer sequence-specific binding|GO:0005515,protein binding|GO:0044212,transcription regulatory region DNA binding	GO:0000790,nuclear chromatin|GO:0005634,nucleus|GO:0005667,transcription factor complex
YDJC	206.341	216.566	389.206	337.917	190.349	173.354	308.411	206.073	259.281	215.755	126.081	156.566	288.633	185.774	215.806	232.908	152.286	159.077	145.652	177.764	250.325	184.055	217.19	-0.44286	0.182493	-2.42672	0.015236	0.0695496	Not DEG	GO:0005975,carbohydrate metabolic process	GO:0000287,magnesium ion binding|GO:0016787,hydrolase activity
RFPL2	21.5142	3.45125	0	6.94944	10.5749	13.53	9.52621	18.3994	4.12867	28.2212	8.40537	0	7.40085	6.05786	0	37.3439	4.54585	11.9037	23.3488	15.0223	11.6295	11.4029	11.5162	-0.0266523	0.721844	-0.0369225	0.970547	0.985607	Not DEG		GO:0046872,metal ion binding
MYADML2	3.91168	0	0	0	0	0	0	0	6.60587	0	240.154	0	3.70043	2.69238	0	11.7928	4.54585	0	0	0	1.05176	26.2885	1.66245	1.10508	2.07199	0.533345	0.593795	NA	Not DEG			GO:0005737,cytoplasm|GO:0016021,integral component of membrane
NLRP13	0	0.862811	0	0	0	0	0	0	0	1.82072	0	0	0	2.01929	0	0	4.54585	2.16432	0	6.25929	0.268353	1.49887	0.883614	2.21075	2.02716	1.09056	0.275465	NA	Not DEG		GO:0005524,ATP binding
APC	10229	10077.6	8323.8	7878.06	11471.4	10698	11300.5	8789.99	11043.4	10259.8	11403.7	10401.2	8674.72	8516.67	10937.9	10647	11311.2	7730.93	11239.7	9310.06	10007.2	10017.3	10012.2	0.00143221	0.0952333	0.015039	0.988001	0.994313	Not DEG	GO:0000281,mitotic cytokinesis|GO:0006461,protein complex assembly|GO:0006974,cellular response to DNA damage stimulus|GO:0007026,negative regulation of microtubule depolymerization|GO:0007026,negative regulation of microtubule depolymerization|GO:0007050,cell cycle arrest|GO:0007094,mitotic spindle assembly checkpoint|GO:0007155,cell adhesion|GO:0008285,negative regulation of cell proliferation|…	GO:0005515,protein binding|GO:0008013,beta-catenin binding|GO:0008017,microtubule binding|GO:0019887,protein kinase regulator activity|GO:0019901,protein kinase binding|GO:0031625,ubiquitin protein ligase binding|GO:0042802,identical protein binding|GO:0045295,gamma-catenin binding|GO:0045296,cadherin binding|GO:0051010,microtubule plus-end binding|GO:0070840,dynein complex binding	GO:0000776,kinetochore|GO:0005634,nucleus|GO:0005654,nucleoplasm|GO:0005737,cytoplasm|GO:0005813,centrosome|GO:0005829,cytosol|GO:0005874,microtubule|GO:0005886,plasma membrane|GO:0005886,plasma membrane|GO:0005913,cell-cell adherens junction|GO:0005923,bicellular tight junction|GO:0016328,lateral plasma membrane|GO:0016342,catenin complex|GO:0030027,lamellipodium|GO:0030877,beta-catenin destruct…	path:hsa04310 Wnt signaling pathway - Homo sapiens (human)|path:hsa04390 Hippo signaling pathway - Homo sapiens (human)|path:hsa04550 Signaling pathways regulating pluripotency of stem cells - Homo sapiens (human)|path:hsa04810 Regulation of actin cytoskeleton - Homo sapiens (human)|path:hsa05166 HTLV-I infection - Homo sapiens (human)|path:hsa05200 Pathways in cancer - Homo sapiens (human)|path:…
TMEM179B	1422.87	1169.11	1183.59	996.376	1404.12	1206.71	1358.68	760.507	1445.03	1610.43	2058.12	1197.16	2003.78	1439.08	1294.84	959.15	1418.31	1522.6	1402.04	1820.2	1255.74	1511.53	1383.63	0.267171	0.149952	1.78171	0.0747973	0.208181	Not DEG	GO:0043312,neutrophil degranulation		GO:0005730,nucleolus|GO:0005886,plasma membrane|GO:0016021,integral component of membrane|GO:0016607,nuclear speck|GO:0030667,secretory granule membrane|GO:0035577,azurophil granule membrane|GO:0101003,ficolin-1-rich granule membrane
ABCE1	4329.25	5653.14	5445.52	3337.47	5786.83	5007.81	4368.96	5341.95	5489.48	4916.85	4201.49	4990.08	5885.53	6591.62	6706.51	5776.52	5698.23	3763.74	5613.72	4918.55	4967.73	5414.6	5191.16	0.124386	0.11924	1.04316	0.296875	0.512222	Not DEG	GO:0000054,ribosomal subunit export from nucleus|GO:0006413,translational initiation|GO:0006415,translational termination|GO:0016032,viral process|GO:0060338,regulation of type I interferon-mediated signaling pathway|GO:0060702,negative regulation of endoribonuclease activity	GO:0005506,iron ion binding|GO:0005515,protein binding|GO:0005524,ATP binding|GO:0016887,ATPase activity|GO:0043024,ribosomal small subunit binding|GO:0060698,endoribonuclease inhibitor activity	GO:0005737,cytoplasm|GO:0005739,mitochondrion|GO:0005759,mitochondrial matrix|GO:0005829,cytosol|GO:0005852,eukaryotic translation initiation factor 3 complex|GO:0016020,membrane
UQCRC2	5616.19	6262.29	7354.57	5060.93	5220.49	6858.04	5295.38	7248.12	6257.41	6763.97	6595.82	5380.54	5519.18	6689.89	5948.99	6776.94	4804.97	4917.32	5125.62	5435.56	6193.74	5719.48	5956.61	-0.11489	0.0954279	-1.20394	0.228612	0.43384	Not DEG	GO:0006119,oxidative phosphorylation|GO:0006122,mitochondrial electron transport, ubiquinol to cytochrome c|GO:0006627,protein processing involved in protein targeting to mitochondrion|GO:0009060,aerobic respiration	GO:0004222,metalloendopeptidase activity|GO:0005515,protein binding|GO:0008270,zinc ion binding|GO:0032403,protein complex binding	GO:0005654,nucleoplasm|GO:0005739,mitochondrion|GO:0005743,mitochondrial inner membrane|GO:0005743,mitochondrial inner membrane|GO:0005750,mitochondrial respiratory chain complex III|GO:0005751,mitochondrial respiratory chain complex IV|GO:0043209,myelin sheath|GO:0070062,extracellular exosome	path:hsa00190 Oxidative phosphorylation - Homo sapiens (human)|path:hsa01100 Metabolic pathways - Homo sapiens (human)|path:hsa04260 Cardiac muscle contraction - Homo sapiens (human)|path:hsa04932 Non-alcoholic fatty liver disease (NAFLD) - Homo sapiens (human)|path:hsa05010 Alzheimer's disease - Homo sapiens (human)|path:hsa05012 Parkinson's disease - Homo sapiens (human)|path:hsa05016 Huntingto…
XPNPEP1	2667.76	3435.72	3113.65	2960.46	3722.37	2881.05	2517.3	3132.8	3277.34	3087.03	2569.64	2595.76	3112.06	3163.55	3466.11	2488.29	2482.04	2990	2649.53	3243.56	3079.55	2876.05	2977.8	-0.0985728	0.0867283	-1.13657	0.255718	0.466773	Not DEG	GO:0006508,proteolysis|GO:0010815,bradykinin catabolic process	GO:0004177,aminopeptidase activity|GO:0030145,manganese ion binding|GO:0042803,protein homodimerization activity|GO:0070006,metalloaminopeptidase activity	GO:0005737,cytoplasm|GO:0005829,cytosol|GO:0070062,extracellular exosome
XPNPEP2	29.3376	17.2562	8.40618	22.5857	22.3248	62.5765	4.7631	17.1727	80.922	40.0558	61.2392	64.9178	7.40085	45.0974	78.1748	133.652	84.0983	220.76	125.639	18.7779	30.5401	83.9757	57.2579	1.45461	0.510496	2.8494	0.00438015	0.0289471	Up	GO:0006501,C-terminal protein lipidation|GO:0006508,proteolysis	GO:0004177,aminopeptidase activity|GO:0046872,metal ion binding|GO:0070006,metalloaminopeptidase activity	GO:0005576,extracellular region|GO:0005886,plasma membrane|GO:0016020,membrane|GO:0031225,anchored component of membrane|GO:0070062,extracellular exosome	path:hsa04974 Protein digestion and absorption - Homo sapiens (human)
XPNPEP3	3627.1	4082.82	3384.33	3481.67	3057.33	4006.58	4184.39	3923.97	3008.98	4396.13	2708.93	3586.71	3065.8	3062.58	3314.17	4171.71	2868.43	2733.53	2262.61	2767.86	3715.33	3054.23	3384.78	-0.282481	0.106753	-2.64611	0.00814234	0.0449332	Not DEG	GO:0003094,glomerular filtration|GO:0016485,protein processing	GO:0004177,aminopeptidase activity|GO:0008237,metallopeptidase activity|GO:0030145,manganese ion binding	GO:0005739,mitochondrion|GO:0070062,extracellular exosome
SLC4A2	2473.16	2121.65	2383.99	3495.57	2318.26	2137.75	2063.61	2149.05	2228.66	2201.25	2175.79	2231.07	3365.54	2599.49	1975.29	1625.44	3115.05	4020.22	2806.31	3803.14	2357.29	2771.73	2564.51	0.2335	0.157331	1.48413	0.137773	0.310366	Not DEG	GO:0006820,anion transport|GO:0007283,spermatogenesis|GO:0015698,inorganic anion transport|GO:0015701,bicarbonate transport|GO:0035725,sodium ion transmembrane transport|GO:0048565,digestive tract development|GO:0051453,regulation of intracellular pH|GO:0098656,anion transmembrane transport	GO:0005452,inorganic anion exchanger activity|GO:0008509,anion transmembrane transporter activity|GO:0008510,sodium:bicarbonate symporter activity|GO:0015301,anion:anion antiporter activity|GO:0019899,enzyme binding	GO:0005886,plasma membrane|GO:0005887,integral component of plasma membrane|GO:0005925,focal adhesion|GO:0016020,membrane|GO:0016323,basolateral plasma membrane|GO:0016324,apical plasma membrane	path:hsa04970 Salivary secretion - Homo sapiens (human)|path:hsa04971 Gastric acid secretion - Homo sapiens (human)|path:hsa04972 Pancreatic secretion - Homo sapiens (human)|path:hsa04976 Bile secretion - Homo sapiens (human)
GGCX	8005.25	8687.65	5964.18	6302.27	8396.49	6765.02	7705.51	7618.56	6764.42	6936.94	2580.45	6810.64	4329.5	4679.36	8497.93	6982.33	6747.18	6028.7	4714.24	3930.83	7314.63	5530.12	6422.37	-0.403427	0.168134	-2.39944	0.0164201	0.0731811	Not DEG	GO:0006464,cellular protein modification process|GO:0007596,blood coagulation|GO:0017187,peptidyl-glutamic acid carboxylation	GO:0008488,gamma-glutamyl carboxylase activity	GO:0005789,endoplasmic reticulum membrane|GO:0016020,membrane|GO:0016021,integral component of membrane	path:hsa00130 Ubiquinone and other terpenoid-quinone biosynthesis - Homo sapiens (human)
PAPLN	4711.62	2396.03	3730.66	3518.15	2973.9	3935.55	4461.84	4314.04	4087.38	3594.1	7618.87	4435.41	6067.77	6222.09	2828.6	4429.19	5947.11	10173.4	5311.3	13363.6	3772.33	6639.73	5206.03	0.815639	0.21845	3.73375	0.000188651	0.00276093	Not DEG	GO:0006508,proteolysis|GO:0010951,negative regulation of endopeptidase activity	GO:0004222,metalloendopeptidase activity|GO:0004867,serine-type endopeptidase inhibitor activity|GO:0008270,zinc ion binding	GO:0005576,extracellular region
ADNP	4040.76	18789.4	16356.7	3823.06	15826	18082.9	18252.2	18815.2	2739.79	18510.3	17371.5	17815.2	16647.3	3536.44	16759.1	2561.99	16809.4	16265.9	15786	15096.1	13523.6	13864.9	13694.3	0.0359513	0.382213	0.0940609	0.925061	0.963366	Not DEG	GO:0006351,transcription, DNA-templated|GO:0006355,regulation of transcription, DNA-templated|GO:0007614,short-term memory|GO:0009743,response to carbohydrate|GO:0010035,response to inorganic substance|GO:0010629,negative regulation of gene expression|GO:0010835,regulation of protein ADP-ribosylation|GO:0030828,positive regulation of cGMP biosynthetic process|GO:0031668,cellular response to extra…	GO:0003677,DNA binding|GO:0003682,chromatin binding|GO:0005507,copper ion binding|GO:0005515,protein binding|GO:0042277,peptide binding|GO:0048487,beta-tubulin binding	GO:0005615,extracellular space|GO:0005634,nucleus|GO:0005737,cytoplasm|GO:0030424,axon|GO:0030425,dendrite|GO:0043025,neuronal cell body
ZNF56	24.448	62.1224	77.3369	57.3329	49.3497	63.4221	42.8679	50.2916	66.0587	83.7531	26.4169	58.2351	40.7047	43.7512	73.7705	86.4807	69.3243	56.2722	34.4673	53.8299	57.6983	54.3253	56.0118	-0.0912006	0.241075	-0.378309	0.705201	0.84245	Not DEG	GO:0006351,transcription, DNA-templated|GO:0006355,regulation of transcription, DNA-templated	GO:0003677,DNA binding|GO:0003700,DNA binding transcription factor activity|GO:0046872,metal ion binding	GO:0005634,nucleus
ZNF57	403.881	566.004	332.885	300.563	446.497	468.478	378.667	316.469	412.867	443.345	440.682	604.308	457.003	376.26	395.278	478.592	313.664	387.412	368.022	459.432	406.966	428.065	417.515	0.0725721	0.13352	0.54353	0.586765	0.763782	Not DEG	GO:0006351,transcription, DNA-templated|GO:0006355,regulation of transcription, DNA-templated	GO:0003677,DNA binding|GO:0046872,metal ion binding	GO:0005634,nucleus
ELOA	6249.88	7276.09	6841.79	7608.77	8632.66	6574.76	6401.61	6644.62	6628.17	7633.37	7442.36	6755.27	6839.31	6431.42	7767.93	5774.55	7352.92	6179.12	7474.96	6668.64	7049.17	6868.65	6958.91	-0.0375015	0.0725423	-0.516961	0.605184	0.775638	Not DEG	GO:0006357,regulation of transcription from RNA polymerase II promoter|GO:0006366,transcription from RNA polymerase II promoter|GO:0006368,transcription elongation from RNA polymerase II promoter|GO:0006368,transcription elongation from RNA polymerase II promoter	GO:0005515,protein binding	GO:0005615,extracellular space|GO:0005654,nucleoplasm|GO:0070449,elongin complex
KHDRBS1	10982	13129.4	12136	11666.4	13728.6	10756.4	8897.48	10822.5	11897.2	10235.2	11933.2	11308.1	11740.5	13824.7	13518.7	11197.3	10558.9	11882.1	11724.4	11386.9	11425.1	11907.5	11666.3	0.0596781	0.0776002	0.769046	0.441866	0.651806	Not DEG	GO:0000086,G2/M transition of mitotic cell cycle|GO:0006351,transcription, DNA-templated|GO:0006397,mRNA processing|GO:0007050,cell cycle arrest|GO:0007165,signal transduction|GO:0007166,cell surface receptor signaling pathway|GO:0007283,spermatogenesis|GO:0008283,cell proliferation|GO:0009967,positive regulation of signal transduction|GO:0031647,regulation of protein stability|GO:0045892,negativ…	GO:0003677,DNA binding|GO:0003723,RNA binding|GO:0005070,SH3/SH2 adaptor activity|GO:0005515,protein binding|GO:0008143,poly(A) binding|GO:0008266,poly(U) RNA binding|GO:0017124,SH3 domain binding|GO:0019904,protein domain specific binding|GO:0032403,protein complex binding|GO:0042802,identical protein binding|GO:0042802,identical protein binding	GO:0005634,nucleus|GO:0005654,nucleoplasm|GO:0005654,nucleoplasm|GO:0005829,cytosol|GO:0016020,membrane|GO:0070618,Grb2-Sos complex
IRF2	4552.21	3723.03	3816.41	3530.32	3314.65	3390.12	3046.01	2420.13	4429.24	2959.58	4620.55	3453.05	3728.18	3697.98	2835.21	3017	3299.15	3057.1	4753.15	3026.99	3518.17	3548.84	3533.5	0.0123442	0.126583	0.0975182	0.922315	0.962236	Not DEG	GO:0000122,negative regulation of transcription from RNA polymerase II promoter|GO:0006355,regulation of transcription, DNA-templated|GO:0006366,transcription from RNA polymerase II promoter|GO:0007596,blood coagulation|GO:0008283,cell proliferation|GO:0045944,positive regulation of transcription from RNA polymerase II promoter|GO:0051607,defense response to virus|GO:0060333,interferon-gamma-medi…	GO:0000977,RNA polymerase II regulatory region sequence-specific DNA binding|GO:0001228,transcriptional activator activity, RNA polymerase II transcription regulatory region sequence-specific DNA binding|GO:0003677,DNA binding|GO:0003700,DNA binding transcription factor activity|GO:0005515,protein binding	GO:0005654,nucleoplasm|GO:0005654,nucleoplasm|GO:0005829,cytosol|GO:0005829,cytosol|GO:0005925,focal adhesion
GGCT	764.733	1198.45	901.143	833.933	1335.97	733.159	853.786	545.848	1066.85	849.366	5120.07	3721.32	6939.22	3769.33	808.173	805.843	2441.12	4513.68	2742.93	7925.51	908.323	3878.72	2393.52	2.09426	0.32468	6.45021	1.11696e-10	1.93548e-08	Up	GO:0001836,release of cytochrome c from mitochondria|GO:0006750,glutathione biosynthetic process	GO:0003839,gamma-glutamylcyclotransferase activity|GO:0003839,gamma-glutamylcyclotransferase activity|GO:0042803,protein homodimerization activity	GO:0005829,cytosol|GO:0005829,cytosol|GO:0070062,extracellular exosome	path:hsa00480 Glutathione metabolism - Homo sapiens (human)
FBXO9	3674.04	4810.17	4368.69	3518.15	2922.2	4097.07	4471.36	3651.66	3092.37	4570.01	2004.08	3541.84	3243.42	2824.31	3637.88	3973.2	3042.31	2940.22	3017.56	2727.8	3917.57	3095.26	3506.42	-0.339851	0.121561	-2.79572	0.00517846	0.0326894	Not DEG	GO:0000209,protein polyubiquitination|GO:0016567,protein ubiquitination|GO:0016567,protein ubiquitination|GO:0031146,SCF-dependent proteasomal ubiquitin-dependent protein catabolic process|GO:0032006,regulation of TOR signaling|GO:0043687,post-translational protein modification|GO:0045087,innate immune response|GO:0045444,fat cell differentiation	GO:0004842,ubiquitin-protein transferase activity|GO:0004842,ubiquitin-protein transferase activity|GO:0004842,ubiquitin-protein transferase activity|GO:0005515,protein binding	GO:0000151,ubiquitin ligase complex|GO:0005737,cytoplasm|GO:0005829,cytosol|GO:0019005,SCF ubiquitin ligase complex
ZNF395	5380.51	6839.51	6155.85	8463.55	5243.99	5396.8	4863.13	5171.45	4619.16	5110.76	5409.46	6239.75	5319.36	6319.02	5078.06	5264.51	2987.76	5787.38	3991.54	5587.04	5724.47	5198.39	5461.43	-0.13906	0.136887	-1.01588	0.309689	0.525539	Not DEG	GO:0006351,transcription, DNA-templated|GO:0006355,regulation of transcription, DNA-templated|GO:0006357,regulation of transcription from RNA polymerase II promoter	GO:0000978,RNA polymerase II proximal promoter sequence-specific DNA binding|GO:0000978,RNA polymerase II proximal promoter sequence-specific DNA binding|GO:0001158,enhancer sequence-specific DNA binding|GO:0003677,DNA binding|GO:0046872,metal ion binding	GO:0005634,nucleus|GO:0005737,cytoplasm|GO:0005829,cytosol
ACTL6A	1313.35	1576.36	1716.54	1297.81	1555.69	1411.35	1125.28	1348.06	1418.61	1373.73	1221.18	1397.64	1382.11	1650.43	1480.92	1385.66	1246.7	1043.2	1240.82	1161.72	1413.68	1321.04	1367.36	-0.0972817	0.0910434	-1.06852	0.285286	0.499914	Not DEG	GO:0003407,neural retina development|GO:0006281,DNA repair|GO:0006310,DNA recombination|GO:0006338,chromatin remodeling|GO:0006338,chromatin remodeling|GO:0006351,transcription, DNA-templated|GO:0006357,regulation of transcription from RNA polymerase II promoter|GO:0007165,signal transduction|GO:0016579,protein deubiquitination|GO:0021510,spinal cord development|GO:0040008,regulation of growth|GO…	GO:0000978,RNA polymerase II proximal promoter sequence-specific DNA binding|GO:0000980,RNA polymerase II distal enhancer sequence-specific DNA binding|GO:0003682,chromatin binding|GO:0003713,transcription coactivator activity|GO:0005515,protein binding|GO:0031492,nucleosomal DNA binding	GO:0000790,nuclear chromatin|GO:0005634,nucleus|GO:0005654,nucleoplasm|GO:0005654,nucleoplasm|GO:0005886,plasma membrane|GO:0016514,SWI/SNF complex|GO:0031011,Ino80 complex|GO:0035267,NuA4 histone acetyltransferase complex|GO:0043234,protein complex|GO:0071564,npBAF complex|GO:0071564,npBAF complex
LHCGR	7.82335	61.2596	39.509	30.4038	50.5246	81.1803	246.491	55.1981	9.90881	96.4982	15.61	20.0481	3.70043	24.2314	49.5474	84.5152	57.9596	139.598	15.5659	77.6151	67.8796	48.8392	58.3594	-0.474498	0.574047	-0.826584	0.408473	0.620498	Not DEG	GO:0001545,primary ovarian follicle growth|GO:0007186,G-protein coupled receptor signaling pathway|GO:0007187,G-protein coupled receptor signaling pathway, coupled to cyclic nucleotide second messenger|GO:0007189,adenylate cyclase-activating G-protein coupled receptor signaling pathway|GO:0007190,activation of adenylate cyclase activity|GO:0007190,activation of adenylate cyclase activity|GO:00072…	GO:0004963,follicle-stimulating hormone receptor activity|GO:0004964,luteinizing hormone receptor activity|GO:0008528,G-protein coupled peptide receptor activity|GO:0035472,choriogonadotropin hormone receptor activity|GO:0038106,choriogonadotropin hormone binding	GO:0005768,endosome|GO:0005886,plasma membrane|GO:0005886,plasma membrane|GO:0005887,integral component of plasma membrane|GO:0005887,integral component of plasma membrane	path:hsa04020 Calcium signaling pathway - Homo sapiens (human)|path:hsa04080 Neuroactive ligand-receptor interaction - Homo sapiens (human)|path:hsa04913 Ovarian steroidogenesis - Homo sapiens (human)|path:hsa04917 Prolactin signaling pathway - Homo sapiens (human)
ARPP21	0	6.90249	0	2.60604	0	4.22814	4.7631	0	0	0	1487.75	0	0	29.6162	5.50526	13.7583	3.40939	0	17.7896	0	1.84998	155.783	4.48896	1.94769	1.37154	1.42007	0.155587	0.336874	Not DEG	GO:0008150,biological_process|GO:0034605,cellular response to heat	GO:0003674,molecular_function|GO:0003676,nucleic acid binding|GO:0005516,calmodulin binding	GO:0005575,cellular_component|GO:0005737,cytoplasm
OR1Q1	9.77919	12.9422	3.36247	4.3434	15.2749	11.8388	9.52621	31.8922	7.43161	3.64144	6.00384	11.4561	15.7268	26.2507	9.90948	0	11.3646	14.068	17.7896	55.0817	11.0032	16.7651	13.8842	0.618054	0.557756	1.10811	0.267816	0.480604	Not DEG	GO:0007186,G-protein coupled receptor signaling pathway|GO:0007186,G-protein coupled receptor signaling pathway|GO:0007608,sensory perception of smell|GO:0050907,detection of chemical stimulus involved in sensory perception|GO:0050911,detection of chemical stimulus involved in sensory perception of smell	GO:0004888,transmembrane signaling receptor activity|GO:0004930,G-protein coupled receptor activity|GO:0004984,olfactory receptor activity	GO:0005886,plasma membrane|GO:0016021,integral component of membrane|GO:0016021,integral component of membrane	path:hsa04740 Olfactory transduction - Homo sapiens (human)
FLT3	185.805	12.9422	360.625	119.009	279.648	56.6571	242.918	83.4104	1015.65	14.5658	136.888	206.21	27.7532	84.81	252.141	188.685	123.875	192.624	992.881	110.163	237.123	231.603	234.363	-0.03447	0.620498	-0.0555522	0.955699	0.978686	Not DEG	GO:0001776,leukocyte homeostasis|GO:0002318,myeloid progenitor cell differentiation|GO:0002328,pro-B cell differentiation|GO:0007169,transmembrane receptor protein tyrosine kinase signaling pathway|GO:0008284,positive regulation of cell proliferation|GO:0010243,response to organonitrogen compound|GO:0014068,positive regulation of phosphatidylinositol 3-kinase signaling|GO:0018108,peptidyl-tyrosin…	GO:0004714,transmembrane receptor protein tyrosine kinase activity|GO:0004896,cytokine receptor activity|GO:0005021,vascular endothelial growth factor-activated receptor activity|GO:0005515,protein binding|GO:0005524,ATP binding|GO:0032403,protein complex binding|GO:0035259,glucocorticoid receptor binding|GO:0042803,protein homodimerization activity|GO:0043621,protein self-association	GO:0005634,nucleus|GO:0005783,endoplasmic reticulum|GO:0005788,endoplasmic reticulum lumen|GO:0005829,cytosol|GO:0005886,plasma membrane|GO:0005887,integral component of plasma membrane|GO:0043234,protein complex	path:hsa04060 Cytokine-cytokine receptor interaction - Homo sapiens (human)|path:hsa04640 Hematopoietic cell lineage - Homo sapiens (human)|path:hsa05200 Pathways in cancer - Homo sapiens (human)|path:hsa05202 Transcriptional misregulation in cancer - Homo sapiens (human)|path:hsa05221 Acute myeloid leukemia - Homo sapiens (human)|path:hsa05230 Central carbon metabolism in cancer - Homo sapiens (…
VPS37B	5164.39	4103.53	4303.12	8822.32	6194.56	5534.63	4517.8	6837.2	4686.87	4784.85	3730.79	4404.86	3439.55	2905.75	5234.41	3548.66	3973.08	2764.91	2761.83	2292.15	5494.93	3505.6	4500.26	-0.64841	0.163618	-3.96295	7.40281e-05	0.00130494	Not DEG	GO:0015031,protein transport|GO:0016197,endosomal transport|GO:0016236,macroautophagy|GO:0019058,viral life cycle|GO:0036258,multivesicular body assembly|GO:0039702,viral budding via host ESCRT complex|GO:0075733,intracellular transport of virus|GO:1902188,positive regulation of viral release from host cell|GO:1903774,positive regulation of viral budding via host ESCRT complex	GO:0005515,protein binding|GO:0048306,calcium-dependent protein binding	GO:0000813,ESCRT I complex|GO:0000813,ESCRT I complex|GO:0005737,cytoplasm|GO:0005768,endosome|GO:0005886,plasma membrane|GO:0010008,endosome membrane|GO:0010008,endosome membrane|GO:0030496,midbody|GO:0031902,late endosome membrane|GO:0043657,host cell|GO:0070062,extracellular exosome	path:hsa04144 Endocytosis - Homo sapiens (human)
MKRN2OS	48.896	38.8265	57.162	50.3835	24.6748	54.9658	84.5451	84.6371	30.5522	58.263	134.486	35.3229	79.5592	76.7328	78.1748	63.8778	139.785	82.244	94.5071	185.275	53.2906	96.9964	75.1435	0.863886	0.282837	3.05436	0.0022554	0.01801	Not DEG
UQCRHL	35.2051	69.8877	26.8998	68.6257	32.8998	35.5164	39.2956	33.1189	40.461	24.5797	27.6177	35.3229	25.903	45.0974	31.9305	29.4821	56.8232	30.3004	50.0332	57.5854	40.649	39.0096	39.8293	-0.0654235	0.249974	-0.261721	0.793537	0.894733	Not DEG	GO:0006122,mitochondrial electron transport, ubiquinol to cytochrome c|GO:0009060,aerobic respiration|GO:1902600,hydrogen ion transmembrane transport	GO:0008121,ubiquinol-cytochrome-c reductase activity	GO:0005750,mitochondrial respiratory chain complex III	path:hsa00190 Oxidative phosphorylation - Homo sapiens (human)|path:hsa01100 Metabolic pathways - Homo sapiens (human)|path:hsa04260 Cardiac muscle contraction - Homo sapiens (human)|path:hsa04932 Non-alcoholic fatty liver disease (NAFLD) - Homo sapiens (human)|path:hsa05010 Alzheimer's disease - Homo sapiens (human)|path:hsa05012 Parkinson's disease - Homo sapiens (human)|path:hsa05016 Huntingto…
ATP5IF1	3343.51	3851.59	3111.97	3016.06	3012.68	3673.41	3071.01	1924.57	3301.29	4169.45	3372.96	3523.7	3630.12	2702.48	2744.92	2938.38	2195.65	2138.34	2769.61	3656.67	3247.55	2967.28	3107.42	-0.130408	0.134034	-0.972948	0.330579	0.546956	Not DEG
C11orf1	691.389	989.645	628.782	773.125	544.021	643.523	890.701	517.635	570.582	730.109	768.491	946.082	756.737	779.444	506.484	483.506	404.581	315.99	425.838	688.521	697.951	607.567	652.759	-0.199732	0.191231	-1.04445	0.296277	0.511597	Not DEG	GO:0008150,biological_process	GO:0003674,molecular_function	GO:0005634,nucleus|GO:0005654,nucleoplasm
TARS2	1646.82	1224.33	1223.1	1569.71	1452.29	1280.28	1476.56	1100.28	1658.9	1484.8	1611.43	1372.82	1689.24	1579.75	1305.85	1147.83	1375.12	1431.69	1627.75	1611.14	1411.71	1475.26	1443.48	0.0633526	0.0945041	0.670369	0.502623	0.700356	Not DEG	GO:0006450,regulation of translational fidelity|GO:0070159,mitochondrial threonyl-tRNA aminoacylation	GO:0002161,aminoacyl-tRNA editing activity|GO:0004829,threonine-tRNA ligase activity|GO:0005524,ATP binding|GO:0016874,ligase activity|GO:0042803,protein homodimerization activity	GO:0005575,cellular_component|GO:0005739,mitochondrion|GO:0005759,mitochondrial matrix	path:hsa00970 Aminoacyl-tRNA biosynthesis - Homo sapiens (human)
DPYSL2	5732.56	5744.6	7906.85	10520.6	4496.69	10876.5	11046.8	8734.79	13192.8	5051.59	5615.99	5891.29	7846.75	9164.86	10404.9	14282.1	12194.3	16228	8771.37	8517.64	8330.37	9891.72	9111.05	0.247827	0.227319	1.09022	0.275618	0.488885	Not DEG	GO:0006139,nucleobase-containing compound metabolic process|GO:0006897,endocytosis|GO:0007010,cytoskeleton organization|GO:0007165,signal transduction|GO:0007399,nervous system development|GO:0007411,axon guidance|GO:0007420,brain development|GO:0030516,regulation of axon extension	GO:0004157,dihydropyrimidinase activity|GO:0005515,protein binding|GO:0008017,microtubule binding|GO:0042802,identical protein binding	GO:0005829,cytosol|GO:0005829,cytosol|GO:0005874,microtubule|GO:0005886,plasma membrane|GO:0016020,membrane|GO:0070062,extracellular exosome	path:hsa04360 Axon guidance - Homo sapiens (human)
DPYSL3	9692.16	7625.53	11508.1	16834.2	11655.9	10813	12375.7	7102.15	13274.5	5106.21	24350.4	18410.9	10699.8	24316.2	12645.6	13821.2	14105.8	30116.4	22397.1	16181.5	10598.7	18704.5	14651.6	0.819483	0.214537	3.81978	0.000133571	0.00209459	Not DEG	GO:0010976,positive regulation of neuron projection development|GO:0010977,negative regulation of neuron projection development|GO:0030336,negative regulation of cell migration|GO:0048666,neuron development|GO:0048678,response to axon injury|GO:0051017,actin filament bundle assembly|GO:0051260,protein homooligomerization|GO:0051491,positive regulation of filopodium assembly|GO:0051764,actin cross…	GO:0005515,protein binding|GO:0016810,hydrolase activity, acting on carbon-nitrogen (but not peptide) bonds|GO:0017124,SH3 domain binding|GO:0031005,filamin binding|GO:0035374,chondroitin sulfate binding	GO:0005615,extracellular space|GO:0005829,cytosol|GO:0005829,cytosol|GO:0030027,lamellipodium|GO:0030426,growth cone|GO:0031941,filamentous actin|GO:0044297,cell body|GO:0070382,exocytic vesicle
OSTM1	1456.12	1539.26	1770.34	1217.89	1784.81	1786.81	1754.01	2288.88	1588.71	1756.08	2114.55	1698.36	2174	2495.84	2256.06	2259.31	1819.48	1819.11	2201.46	2034.27	1694.29	2087.24	1890.77	0.301607	0.102021	2.95631	0.0031134	0.0225728	Not DEG	GO:0030316,osteoclast differentiation|GO:0034220,ion transmembrane transport		GO:0005765,lysosomal membrane|GO:0005829,cytosol|GO:0016021,integral component of membrane
C10orf55	90.9465	34.5125	102.555	92.0801	117.499	43.9726	65.4927	49.065	53.6727	44.6076	176.513	224.348	267.356	187.794	96.8927	74.6879	378.442	211.021	420.279	461.935	69.4404	249.927	159.684	1.84785	0.319671	5.78047	7.44915e-09	6.72286e-07	Up
KRTAP10-12	4.8896	1.72562	6.72494	0	4.69997	6.76502	0	3.67987	0	4.5518	0	4.77337	3.70043	0	0	5.89641	0	2.16432	0	5.00743	3.30368	2.15419	2.72894	-0.618182	1.04873	-0.589457	0.555555	NA	Not DEG	GO:0031424,keratinization		GO:0005829,cytosol|GO:0045095,keratin filament
KRTAP10-11	13.6909	25.8843	12.6093	13.8989	8.22494	18.6038	11.9078	18.3994	9.90881	0	0	11.4561	3.70043	2.69238	13.2126	21.6202	13.6376	22.7253	4.44739	8.763	13.3128	10.2255	11.7692	-0.384209	0.570545	-0.673408	0.500688	0.69905	Not DEG	GO:0031424,keratinization	GO:0005515,protein binding	GO:0005829,cytosol|GO:0045095,keratin filament
KRTAP10-10	8.80127	6.03968	1.68124	17.3736	9.39993	5.07377	7.14466	6.13312	4.12867	0	1.20077	2.86402	7.40085	2.01929	0	3.93094	0	4.32863	4.44739	0	6.57759	2.61919	4.59839	-1.30381	0.707891	-1.84182	0.0655008	0.190486	Not DEG	GO:0031424,keratinization		GO:0005829,cytosol|GO:0045095,keratin filament
IGFBP2	311.956	245.038	300.101	559.43	336.048	426.196	316.746	518.862	341.854	395.096	929.394	359.912	532.861	566.073	342.427	402.921	873.94	1279.11	1557.7	1132.93	375.133	797.727	586.43	1.08818	0.269186	4.04247	5.28914e-05	0.000988675	Up	GO:0001558,regulation of cell growth|GO:0007165,signal transduction|GO:0007565,female pregnancy|GO:0007568,aging|GO:0007584,response to nutrient|GO:0009612,response to mechanical stimulus|GO:0010226,response to lithium ion|GO:0032355,response to estradiol|GO:0032526,response to retinoic acid|GO:0032870,cellular response to hormone stimulus|GO:0042104,positive regulation of activated T cell prolif…	GO:0005102,receptor binding|GO:0005515,protein binding|GO:0031994,insulin-like growth factor I binding|GO:0031995,insulin-like growth factor II binding|GO:0031995,insulin-like growth factor II binding	GO:0005576,extracellular region|GO:0005576,extracellular region|GO:0005615,extracellular space|GO:0016324,apical plasma membrane|GO:0031410,cytoplasmic vesicle|GO:0070062,extracellular exosome
IGFBP3	1744.61	1165.66	3132.14	2657.29	4204.12	2305.18	2613.75	2494.95	3873.52	1998.24	5255.76	3365.22	4422.01	5622.36	614.388	2916.76	20418.8	6473.47	4867.67	699.788	2618.95	5465.63	4042.29	1.06141	0.424459	2.50061	0.0123978	0.0603156	Up	GO:0001558,regulation of cell growth|GO:0001649,osteoblast differentiation|GO:0001933,negative regulation of protein phosphorylation|GO:0006468,protein phosphorylation|GO:0006915,apoptotic process|GO:0008285,negative regulation of cell proliferation|GO:0009968,negative regulation of signal transduction|GO:0010906,regulation of glucose metabolic process|GO:0014912,negative regulation of smooth mus…	GO:0001968,fibronectin binding|GO:0005515,protein binding|GO:0005520,insulin-like growth factor binding|GO:0008160,protein tyrosine phosphatase activator activity|GO:0031994,insulin-like growth factor I binding|GO:0031995,insulin-like growth factor II binding|GO:0046872,metal ion binding	GO:0005576,extracellular region|GO:0005576,extracellular region|GO:0005615,extracellular space|GO:0005634,nucleus|GO:0005788,endoplasmic reticulum lumen|GO:0016942,insulin-like growth factor binding protein complex|GO:0042567,insulin-like growth factor ternary complex|GO:0070062,extracellular exosome	path:hsa04115 p53 signaling pathway - Homo sapiens (human)|path:hsa05202 Transcriptional misregulation in cancer - Homo sapiens (human)
LRFN1	43.0285	34.5125	51.2777	46.9087	31.7248	87.9453	46.4403	23.3059	60.2786	74.6495	9.60614	33.4136	17.577	16.8274	57.2547	45.2058	65.9149	21.6432	95.619	15.0223	50.0072	37.8084	43.9078	-0.408567	0.385062	-1.06104	0.288671	0.503684	Not DEG	GO:0007409,axonogenesis		GO:0005578,proteinaceous extracellular matrix|GO:0005615,extracellular space|GO:0005886,plasma membrane|GO:0009986,cell surface|GO:0014069,postsynaptic density|GO:0016021,integral component of membrane|GO:0030054,cell junction|GO:0045211,postsynaptic membrane
GSG1L	15.6467	11.2165	12.6093	13.8989	10.5749	14.3757	75.0189	11.0396	20.6434	16.3865	0	19.0935	0	67.9826	34.1326	27.5166	36.3668	41.122	4.44739	3.75557	20.141	23.4417	21.7914	0.227368	0.677773	0.335463	0.737276	0.861733	Not DEG		GO:0005515,protein binding	GO:0030054,cell junction|GO:0099061,integral component of postsynaptic density membrane
IGFBP6	467.445	302.847	484.196	2167.36	790.769	1663.35	859.74	888.076	1067.67	1085.15	1354.47	2324.63	2334.97	2923.25	813.678	1921.25	3504.85	3713.96	12003.5	14168.5	977.66	4506.31	2741.98	2.20444	0.445702	4.946	7.57535e-07	3.21729e-05	Up	GO:0001558,regulation of cell growth|GO:0007165,signal transduction|GO:0008285,negative regulation of cell proliferation|GO:0043567,regulation of insulin-like growth factor receptor signaling pathway|GO:0044267,cellular protein metabolic process|GO:0090090,negative regulation of canonical Wnt signaling pathway	GO:0005102,receptor binding|GO:0031994,insulin-like growth factor I binding|GO:0031995,insulin-like growth factor II binding	GO:0005576,extracellular region|GO:0005794,Golgi apparatus|GO:0042568,insulin-like growth factor binary complex|GO:0070062,extracellular exosome
IGFBP7	13092.4	19415	18559.2	17248.5	16290.1	19408.9	14862.1	17067.2	15872.3	15780.2	23944.5	24680.2	7406.4	12179.7	16393.6	23826.4	16016.2	20393.3	17066.9	11688.6	16759.6	17359.6	17059.6	0.0507264	0.17828	0.284533	0.776002	0.885108	Not DEG	GO:0001558,regulation of cell growth|GO:0007155,cell adhesion|GO:0007566,embryo implantation|GO:0008285,negative regulation of cell proliferation|GO:0009408,response to heat|GO:0032526,response to retinoic acid|GO:0032870,cellular response to hormone stimulus|GO:0043687,post-translational protein modification|GO:0044267,cellular protein metabolic process|GO:0050810,regulation of steroid biosynthe…	GO:0005515,protein binding|GO:0005520,insulin-like growth factor binding	GO:0005576,extracellular region|GO:0005576,extracellular region|GO:0005615,extracellular space|GO:0005788,endoplasmic reticulum lumen|GO:0031012,extracellular matrix|GO:0031012,extracellular matrix|GO:0070062,extracellular exosome
IGFBP4	14932.8	14025.9	13906.3	17976.5	14930.6	16623.4	12961.6	14466.8	13997.8	12989	24927.9	16897.7	34626.7	44217	14001	17968.3	17807.2	34361.7	24203.8	20717	14681.1	24972.8	19827	0.766425	0.180067	4.25632	2.07819e-05	0.000474452	Not DEG	GO:0001501,skeletal system development|GO:0001558,regulation of cell growth|GO:0006259,DNA metabolic process|GO:0006954,inflammatory response|GO:0007165,signal transduction|GO:0008283,cell proliferation|GO:0010906,regulation of glucose metabolic process|GO:0043410,positive regulation of MAPK cascade|GO:0043567,regulation of insulin-like growth factor receptor signaling pathway|GO:0043568,positive…	GO:0005102,receptor binding|GO:0005515,protein binding|GO:0031994,insulin-like growth factor I binding|GO:0031995,insulin-like growth factor II binding	GO:0005576,extracellular region|GO:0005615,extracellular space|GO:0005788,endoplasmic reticulum lumen
SPDEF	0	0	0	0	0	0	0	0	0	3.64144	0	0	0	2.69238	0	0	0	1.08216	0	6.25929	0.364144	1.00338	0.683763	1.34832	2.97967	0.452508	0.650903	NA	Not DEG	GO:0000122,negative regulation of transcription from RNA polymerase II promoter|GO:0006351,transcription, DNA-templated|GO:0007275,multicellular organism development|GO:0010454,negative regulation of cell fate commitment|GO:0010455,positive regulation of cell fate commitment|GO:0030154,cell differentiation|GO:0043065,positive regulation of apoptotic process|GO:0045944,positive regulation of trans…	GO:0000981,RNA polymerase II transcription factor activity, sequence-specific DNA binding|GO:0001227,transcriptional repressor activity, RNA polymerase II transcription regulatory region sequence-specific DNA binding|GO:0043565,sequence-specific DNA binding	GO:0005634,nucleus
MYRFL	248.392	24.1587	282.448	35.6159	157.449	249.46	91.6898	23.3059	240.289	112.885	284.582	8.59206	659.601	30.9624	178.371	228.977	122.738	31.3826	649.32	286.675	146.569	248.12	197.345	0.758801	0.594565	1.27623	0.201874	0.400833	Not DEG	GO:0006355,regulation of transcription, DNA-templated	GO:0003677,DNA binding|GO:0003700,DNA binding transcription factor activity	GO:0016021,integral component of membrane
SKP2	1253.69	1156.17	1111.3	659.328	814.269	1311.57	1431.31	908.929	1085.01	917.643	713.256	958.492	998.19	951.083	832.396	1385.66	1300.11	934.984	879.472	857.522	1064.92	981.117	1023.02	-0.118077	0.148277	-0.796329	0.425841	0.636392	Not DEG	GO:0000082,G1/S transition of mitotic cell cycle|GO:0000086,G2/M transition of mitotic cell cycle|GO:0000209,protein polyubiquitination|GO:0008283,cell proliferation|GO:0016579,protein deubiquitination|GO:0031145,anaphase-promoting complex-dependent catabolic process|GO:0033148,positive regulation of intracellular estrogen receptor signaling pathway|GO:0042981,regulation of apoptotic process|GO:0…	GO:0004842,ubiquitin-protein transferase activity|GO:0004842,ubiquitin-protein transferase activity|GO:0005515,protein binding|GO:0042802,identical protein binding|GO:0061630,ubiquitin protein ligase activity	GO:0005634,nucleus|GO:0005654,nucleoplasm|GO:0005730,nucleolus|GO:0005829,cytosol|GO:0005829,cytosol|GO:0019005,SCF ubiquitin ligase complex	path:hsa04068 FoxO signaling pathway - Homo sapiens (human)|path:hsa04110 Cell cycle - Homo sapiens (human)|path:hsa04120 Ubiquitin mediated proteolysis - Homo sapiens (human)|path:hsa04150 mTOR signaling pathway - Homo sapiens (human)|path:hsa05168 Herpes simplex infection - Homo sapiens (human)|path:hsa05169 Epstein-Barr virus infection - Homo sapiens (human)|path:hsa05200 Pathways in cancer - …
SRARP	69.4323	34.5125	36.9872	92.0801	15.2749	42.2814	28.5786	9.81299	23.1206	51.8905	0	43.915	0	0	24.2232	18.672	0	0	10.0066	0	40.3971	9.68168	25.0394	-2.05973	0.931456	-2.2113	0.0270149	0.103496	Down
CKLF	290.442	342.536	532.111	361.371	254.973	336.56	363.187	326.282	273.318	305.881	600.384	604.308	641.099	677.134	270.859	365.577	472.769	410.138	589.28	1096.63	338.666	572.817	455.742	0.757628	0.204627	3.70249	0.000213497	0.00304049	Not DEG	GO:0008283,cell proliferation|GO:0010469,regulation of receptor activity|GO:0030593,neutrophil chemotaxis|GO:0032940,secretion by cell|GO:0048246,macrophage chemotaxis|GO:0048247,lymphocyte chemotaxis	GO:0008009,chemokine activity	GO:0005576,extracellular region|GO:0005615,extracellular space|GO:0016020,membrane|GO:0016021,integral component of membrane
INS-IGF2	0	0	0	0	0	0	0	3.67987	0	0	0	0	0	0	0	0	0	0	0	0	0.367987	0	0.183994	-0.768024	3.02619	-0.253792	0.799656	NA	Not DEG	GO:0010469,regulation of receptor activity	GO:0005179,hormone activity	GO:0005576,extracellular region
GJA1	38190.7	33840.3	32174.7	26756.2	31664.9	38045.6	24189.4	29475.8	24548.3	30551.7	19197.9	26156.1	12953.3	16344.8	28970.9	35632	12393.1	22102	27045.7	9198.65	30943.8	20999.5	25971.6	-0.559294	0.204484	-2.73515	0.00623519	0.0373207	Not DEG	GO:0001937,negative regulation of endothelial cell proliferation|GO:0002544,chronic inflammatory response|GO:0002931,response to ischemia|GO:0003104,positive regulation of glomerular filtration|GO:0003158,endothelium development|GO:0006810,transport|GO:0006915,apoptotic process|GO:0006936,muscle contraction|GO:0007165,signal transduction|GO:0007204,positive regulation of cytosolic calcium ion con…	GO:0004871,signal transducer activity|GO:0004871,signal transducer activity|GO:0005243,gap junction channel activity|GO:0005515,protein binding|GO:0015075,ion transmembrane transporter activity|GO:0017124,SH3 domain binding|GO:0030165,PDZ domain binding|GO:0071253,connexin binding|GO:0086075,gap junction channel activity involved in cardiac conduction electrical coupling|GO:0097718,disordered dom…	GO:0000139,Golgi membrane|GO:0005739,mitochondrion|GO:0005741,mitochondrial outer membrane|GO:0005764,lysosome|GO:0005769,early endosome|GO:0005771,multivesicular body|GO:0005789,endoplasmic reticulum membrane|GO:0005794,Golgi apparatus|GO:0005886,plasma membrane|GO:0005886,plasma membrane|GO:0005887,integral component of plasma membrane|GO:0005916,fascia adherens|GO:0005921,gap junction|GO:00059…	path:hsa04540 Gap junction - Homo sapiens (human)|path:hsa05412 Arrhythmogenic right ventricular cardiomyopathy (ARVC) - Homo sapiens (human)
GJA3	0	6.90249	15.9717	6.94944	23.4998	4.22814	15.4801	55.1981	17.3404	29.1315	51.633	19.0935	14.8017	21.539	22.0211	16.7065	204.563	185.049	66.7109	68.8521	17.4702	67.097	42.2836	1.94668	0.619287	3.14342	0.00166984	0.0144098	Up	GO:0006810,transport|GO:0007267,cell-cell signaling|GO:0007601,visual perception|GO:0055085,transmembrane transport	GO:0005243,gap junction channel activity	GO:0005922,connexin complex|GO:0016021,integral component of membrane
GJA4	420.505	628.99	452.253	463.007	527.571	591.094	454.876	458.757	540.03	430.6	1564.6	669.226	614.271	835.984	462.442	655.484	946.674	1272.62	633.754	792.425	496.768	844.748	670.758	0.765365	0.187313	4.08603	4.38826e-05	0.000859774	Not DEG	GO:0001568,blood vessel development|GO:0003158,endothelium development|GO:0006810,transport|GO:0006816,calcium ion transport|GO:0007043,cell-cell junction assembly|GO:0007267,cell-cell signaling|GO:0048265,response to pain	GO:0005515,protein binding	GO:0005887,integral component of plasma membrane|GO:0005921,gap junction|GO:0005922,connexin complex
GJA5	464.512	670.404	522.024	576.804	656.82	721.321	523.941	662.377	326.165	568.065	1101.1	852.524	1445.02	1124.74	659.531	877.583	1014.86	2504.11	643.76	518.269	569.243	1074.15	821.697	0.916353	0.236204	3.87949	0.000104674	0.0017225	Not DEG	GO:0001501,skeletal system development|GO:0001525,angiogenesis|GO:0003105,negative regulation of glomerular filtration|GO:0003151,outflow tract morphogenesis|GO:0003158,endothelium development|GO:0003161,cardiac conduction system development|GO:0003174,mitral valve development|GO:0003193,pulmonary valve formation|GO:0003281,ventricular septum development|GO:0003283,atrial septum development|GO:00…	GO:0055077,gap junction hemi-channel activity|GO:0071253,connexin binding|GO:0086020,gap junction channel activity involved in SA node cell-atrial cardiac muscle cell electrical coupling|GO:0086075,gap junction channel activity involved in cardiac conduction electrical coupling|GO:0086075,gap junction channel activity involved in cardiac conduction electrical coupling|GO:0086076,gap junction chan…	GO:0005887,integral component of plasma membrane|GO:0005921,gap junction|GO:0005922,connexin complex|GO:0005922,connexin complex|GO:0014704,intercalated disc|GO:0014704,intercalated disc|GO:0042995,cell projection
RUNX3	812.651	82.8299	845.662	287.533	359.547	300.198	214.34	159.461	1773.68	212.114	440.682	291.175	244.228	345.298	469.049	355.75	259.114	404.727	1887.92	226.586	504.801	492.453	498.627	-0.0361567	0.480375	-0.0752678	0.940002	0.970428	Not DEG	GO:0000122,negative regulation of transcription from RNA polymerase II promoter|GO:0001503,ossification|GO:0002062,chondrocyte differentiation|GO:0006355,regulation of transcription, DNA-templated|GO:0006357,regulation of transcription from RNA polymerase II promoter|GO:0006366,transcription from RNA polymerase II promoter|GO:0006468,protein phosphorylation|GO:0030097,hemopoiesis|GO:0045595,regul…	GO:0000977,RNA polymerase II regulatory region sequence-specific DNA binding|GO:0000981,RNA polymerase II transcription factor activity, sequence-specific DNA binding|GO:0000981,RNA polymerase II transcription factor activity, sequence-specific DNA binding|GO:0003700,DNA binding transcription factor activity|GO:0005515,protein binding|GO:0005524,ATP binding	GO:0000790,nuclear chromatin|GO:0005634,nucleus|GO:0005654,nucleoplasm|GO:0005730,nucleolus|GO:0005737,cytoplasm|GO:0005829,cytosol|GO:0005829,cytosol|GO:0043231,intracellular membrane-bounded organelle	path:hsa04658 Th1 and Th2 cell differentiation - Homo sapiens (human)
GJA8	0	0	4.20309	0	0	4.22814	0	0	3.30294	0	0	0	0	0	0	0	0	0	0	0	1.17342	0	0.586708	-2.64094	2.98545	-0.884603	0.376371	NA	Not DEG	GO:0002088,lens development in camera-type eye|GO:0006810,transport|GO:0007267,cell-cell signaling|GO:0007601,visual perception|GO:0051260,protein homooligomerization|GO:0055085,transmembrane transport	GO:0005243,gap junction channel activity|GO:0015267,channel activity	GO:0005887,integral component of plasma membrane|GO:0005922,connexin complex
CYP8B1	57.6972	32.7868	50.4371	264.079	111.624	130.227	133.367	134.929	191.57	118.347	13.2084	83.0566	27.7532	16.1543	69.3663	122.842	42.0491	138.516	72.2702	50.0743	122.506	63.5291	93.0177	-0.948106	0.418489	-2.26555	0.0234791	0.0938081	Not DEG	GO:0006699,bile acid biosynthetic process|GO:0016125,sterol metabolic process|GO:0055114,oxidation-reduction process	GO:0005506,iron ion binding|GO:0008397,sterol 12-alpha-hydroxylase activity|GO:0019825,oxygen binding|GO:0020037,heme binding|GO:0033778,7alpha-hydroxycholest-4-en-3-one 12alpha-hydroxylase activity	GO:0005789,endoplasmic reticulum membrane|GO:0016021,integral component of membrane|GO:0031090,organelle membrane	path:hsa00120 Primary bile acid biosynthesis - Homo sapiens (human)|path:hsa01100 Metabolic pathways - Homo sapiens (human)|path:hsa03320 PPAR signaling pathway - Homo sapiens (human)
BCDIN3D	525.143	559.965	493.443	345.735	328.998	430.425	496.554	642.751	481.403	589.913	338.617	501.204	368.192	347.317	363.347	537.556	512.545	352.783	342.449	220.327	489.433	388.434	438.933	-0.33269	0.160833	-2.06854	0.038589	0.13241	Not DEG	GO:0001510,RNA methylation|GO:0010586,miRNA metabolic process|GO:2000632,negative regulation of pre-miRNA processing	GO:0005515,protein binding|GO:0008171,O-methyltransferase activity|GO:0008173,RNA methyltransferase activity	GO:0005634,nucleus|GO:0005737,cytoplasm|GO:0005829,cytosol
BSX	2.93376	0	0	0	0	0	0	0	2.4772	0	0	2.86402	0	0	0	0	0	0	0	0	0.541096	0.286402	0.413749	-0.684346	3.01576	-0.226923	0.820484	NA	Not DEG	GO:0006351,transcription, DNA-templated|GO:0007626,locomotory behavior|GO:0042755,eating behavior|GO:0045944,positive regulation of transcription from RNA polymerase II promoter|GO:0060056,mammary gland involution	GO:0003700,DNA binding transcription factor activity|GO:0043565,sequence-specific DNA binding	GO:0005634,nucleus|GO:0005667,transcription factor complex|GO:0005737,cytoplasm
OR4D1	0	0	0	0	0	4.22814	0	9.81299	0	0	4.80307	0	0	0	0	3.93094	0	0	5.55924	6.25929	1.40411	2.05525	1.72968	0.555716	2.10665	0.263791	0.791941	NA	Not DEG	GO:0007186,G-protein coupled receptor signaling pathway|GO:0007186,G-protein coupled receptor signaling pathway|GO:0007608,sensory perception of smell|GO:0050907,detection of chemical stimulus involved in sensory perception|GO:0050911,detection of chemical stimulus involved in sensory perception of smell	GO:0004888,transmembrane signaling receptor activity|GO:0004930,G-protein coupled receptor activity|GO:0004984,olfactory receptor activity	GO:0005886,plasma membrane|GO:0016021,integral component of membrane|GO:0016021,integral component of membrane	path:hsa04740 Olfactory transduction - Homo sapiens (human)
KDM3B	18780	18836.9	15870	19050.2	16354.7	15908	16681.6	16204.9	15900.3	17271.3	20558.3	16226.6	16423.4	17909	15819.9	14943.5	16973.1	17763.6	17503.8	18242.1	17085.8	17236.3	17161.1	0.0125987	0.0627051	0.20092	0.840761	0.921662	Not DEG	GO:0006351,transcription, DNA-templated|GO:0006355,regulation of transcription, DNA-templated|GO:0033169,histone H3-K9 demethylation|GO:0055114,oxidation-reduction process|GO:0072718,response to cisplatin|GO:0098869,cellular oxidant detoxification	GO:0000976,transcription regulatory region sequence-specific DNA binding|GO:0016209,antioxidant activity|GO:0031490,chromatin DNA binding|GO:0032452,histone demethylase activity|GO:0032454,histone demethylase activity (H3-K9 specific)|GO:0046872,metal ion binding|GO:0051213,dioxygenase activity	GO:0000785,chromatin|GO:0005634,nucleus|GO:0005654,nucleoplasm
ZNF117	341.294	2855.04	2924.51	204.14	3053.8	309.5	684.696	3731.39	265.061	3000.55	919.788	632.949	398.721	4544.07	2852.83	3810.06	8847.37	648.212	2054.7	588.373	1737	2529.71	2133.35	0.542424	0.639015	0.848844	0.395968	0.609409	Not DEG	GO:0006351,transcription, DNA-templated|GO:0006355,regulation of transcription, DNA-templated	GO:0003677,DNA binding|GO:0003700,DNA binding transcription factor activity|GO:0008270,zinc ion binding	GO:0005634,nucleus
ZNF114	664.985	974.114	680.06	486.461	818.969	884.527	1007.4	592.459	511.13	1192.57	2802.59	884.028	911.23	1211.57	812.577	848.1	398.899	620.076	519.233	2001.72	781.267	1101	941.135	0.494781	0.297569	1.66274	0.0963645	0.246357	Not DEG	GO:0006351,transcription, DNA-templated|GO:0006355,regulation of transcription, DNA-templated|GO:0008150,biological_process	GO:0003674,molecular_function|GO:0003677,DNA binding|GO:0005515,protein binding|GO:0042802,identical protein binding|GO:0046872,metal ion binding	GO:0005634,nucleus|GO:0070062,extracellular exosome
KDM3A	6463.07	7974.97	6962.84	7425.48	6849.03	7546.38	7301.84	9475.67	6630.65	6790.37	8153.21	7304.21	6138.08	6883.74	6455.47	6501.78	6811.96	7503.68	7380.45	7433.53	7342.03	7056.61	7199.32	-0.0571911	0.0746821	-0.765794	0.443799	0.653757	Not DEG	GO:0006351,transcription, DNA-templated|GO:0007290,spermatid nucleus elongation|GO:0009755,hormone-mediated signaling pathway|GO:0030521,androgen receptor signaling pathway|GO:0033169,histone H3-K9 demethylation|GO:0033169,histone H3-K9 demethylation|GO:0036123,histone H3-K9 dimethylation|GO:0045893,positive regulation of transcription, DNA-templated|GO:0045944,positive regulation of transcriptio…	GO:0000976,transcription regulatory region sequence-specific DNA binding|GO:0001047,core promoter binding|GO:0003700,DNA binding transcription factor activity|GO:0005506,iron ion binding|GO:0005515,protein binding|GO:0031490,chromatin DNA binding|GO:0032452,histone demethylase activity|GO:0032454,histone demethylase activity (H3-K9 specific)|GO:0032454,histone demethylase activity (H3-K9 specific…	GO:0000785,chromatin|GO:0005634,nucleus|GO:0005654,nucleoplasm|GO:0005654,nucleoplasm|GO:0005737,cytoplasm|GO:0016020,membrane
ZNF112	1860.98	2237.27	1718.22	1620.96	1818.89	2307.72	2125.54	2361.25	1678.72	1974.57	1881.6	1980.95	1723.47	1836.2	2103.01	1915.35	2203.6	1619.99	1595.5	1832.72	1970.41	1869.24	1919.83	-0.0758268	0.0888677	-0.853254	0.393518	0.607472	Not DEG	GO:0006351,transcription, DNA-templated|GO:0006355,regulation of transcription, DNA-templated	GO:0003677,DNA binding|GO:0003700,DNA binding transcription factor activity|GO:0046872,metal ion binding	GO:0005634,nucleus
SEZ6L	56.7193	61.2596	83.2212	99.0295	64.6245	30.4426	105.979	4.9065	61.1043	13.6554	12.0077	496.43	29.6034	158.177	73.7705	65.8433	77.2795	138.516	166.777	56.3336	58.0942	127.474	92.7841	1.13437	0.531023	2.1362	0.0326631	0.118234	Up	GO:0008344,adult locomotory behavior|GO:0021680,cerebellar Purkinje cell layer development|GO:0060074,synapse maturation|GO:0090036,regulation of protein kinase C signaling		GO:0005789,endoplasmic reticulum membrane|GO:0016021,integral component of membrane|GO:0043025,neuronal cell body
HSD17B10	1145.14	1406.38	1914.09	1863.32	1368.87	1531.43	919.279	1527.15	1591.19	2026.46	737.271	951.81	1076.82	866.947	1763.89	1153.73	655.739	932.82	1026.24	816.211	1529.33	998.148	1263.74	-0.615751	0.172655	-3.56636	0.000361968	0.0046153	Not DEG	GO:0006629,lipid metabolic process|GO:0007005,mitochondrion organization|GO:0009083,branched-chain amino acid catabolic process|GO:0055114,oxidation-reduction process|GO:0070901,mitochondrial tRNA methylation|GO:0090646,mitochondrial tRNA processing	GO:0003723,RNA binding|GO:0003857,3-hydroxyacyl-CoA dehydrogenase activity|GO:0003857,3-hydroxyacyl-CoA dehydrogenase activity|GO:0005515,protein binding|GO:0008709,cholate 7-alpha-dehydrogenase activity|GO:0030283,testosterone dehydrogenase [NAD(P)] activity|GO:0047015,3-hydroxy-2-methylbutyryl-CoA dehydrogenase activity	GO:0005737,cytoplasm|GO:0005739,mitochondrion|GO:0005739,mitochondrion|GO:0005759,mitochondrial matrix|GO:0005886,plasma membrane|GO:0030678,mitochondrial ribonuclease P complex	path:hsa00280 Valine, leucine and isoleucine degradation - Homo sapiens (human)|path:hsa01100 Metabolic pathways - Homo sapiens (human)|path:hsa05010 Alzheimer's disease - Homo sapiens (human)
NIF3L1	998.456	981.879	1114.66	762.701	955.268	1150.05	890.701	998.472	1014	1318.2	1269.21	1054.91	1073.12	1236.48	818.082	1130.15	979.631	787.811	956.19	991.471	1018.44	1029.71	1024.07	0.0160114	0.108024	0.148221	0.882169	0.941908	Not DEG	GO:0030182,neuron differentiation|GO:0045893,positive regulation of transcription, DNA-templated|GO:1903507,negative regulation of nucleic acid-templated transcription	GO:0005515,protein binding|GO:0008134,transcription factor binding|GO:0042802,identical protein binding	GO:0005634,nucleus|GO:0005737,cytoplasm|GO:0005739,mitochondrion
TMC4	2727.42	2947.36	2594.99	4352.09	2359.38	3020.58	2538.73	2479.01	2405.36	3348.3	2055.71	2540.39	3885.45	3059.22	1627.36	2597.37	2642.28	2670.76	2441.62	4450.35	2877.32	2797.05	2837.19	-0.0409034	0.163384	-0.25035	0.802316	0.900132	Not DEG	GO:0006811,ion transport		GO:0016021,integral component of membrane|GO:0070062,extracellular exosome
TMC5	1586.19	286.453	427.034	431.734	536.971	2100.54	1944.54	1108.87	413.693	505.25	367.435	195.708	385.769	266.546	583.558	1897.66	482.997	335.469	202.356	128.941	934.127	484.644	709.385	-0.946482	0.454546	-2.08226	0.0373191	0.129385	Not DEG	GO:0006811,ion transport		GO:0016021,integral component of membrane|GO:0070062,extracellular exosome
TMC6	617.067	141.501	1032.28	462.138	579.271	299.352	489.409	434.225	1216.31	466.104	1750.72	1345.14	3803.11	3332.49	382.065	556.228	2760.47	3476.97	2635.08	8501.36	573.765	2854.36	1714.06	2.31449	0.424107	5.45733	4.83344e-08	3.2974e-06	Up	GO:0006811,ion transport|GO:0008150,biological_process|GO:0043312,neutrophil degranulation	GO:0005515,protein binding	GO:0005737,cytoplasm|GO:0005783,endoplasmic reticulum|GO:0005789,endoplasmic reticulum membrane|GO:0005794,Golgi apparatus|GO:0005886,plasma membrane|GO:0016021,integral component of membrane|GO:0031965,nuclear membrane|GO:0035579,specific granule membrane|GO:0070062,extracellular exosome|GO:0070821,tertiary granule membrane
TMC7	157.445	97.4977	155.514	143.332	124.549	175.045	160.755	128.796	96.6109	142.016	111.671	150.838	274.757	154.139	187.179	217.184	311.391	548.654	190.126	270.401	138.156	241.634	189.895	0.806026	0.239262	3.3688	0.000754959	0.00800906	Not DEG	GO:0006811,ion transport		GO:0016021,integral component of membrane
APIP	1286.94	2050.04	1706.45	2037.06	1993.96	2323.79	1799.26	1681.7	1808.36	2562.66	1773.53	1790.01	2140.7	2521.41	2637.02	2147.28	2188.83	1226.08	2187.01	2139.42	1925.02	2075.13	2000.08	0.108324	0.135229	0.801043	0.423107	0.633673	Not DEG	GO:0006915,apoptotic process|GO:0019509,L-methionine salvage from methylthioadenosine|GO:0019509,L-methionine salvage from methylthioadenosine|GO:0043066,negative regulation of apoptotic process|GO:0051289,protein homotetramerization|GO:0070269,pyroptosis|GO:0070372,regulation of ERK1 and ERK2 cascade	GO:0005515,protein binding|GO:0008270,zinc ion binding|GO:0042802,identical protein binding|GO:0046570,methylthioribulose 1-phosphate dehydratase activity	GO:0005737,cytoplasm	path:hsa00270 Cysteine and methionine metabolism - Homo sapiens (human)|path:hsa01100 Metabolic pathways - Homo sapiens (human)
TMC1	0	10.3537	10.928	1.73736	5.87496	22.832	0	19.626	4.12867	11.8347	21.6138	13.3654	1.85021	5.38476	7.70737	13.7583	44.3221	41.122	14.454	3.75557	8.73154	16.7334	12.7324	0.933502	0.68178	1.36921	0.170933	0.359326	Not DEG	GO:0050910,detection of mechanical stimulus involved in sensory perception of sound|GO:0060005,vestibular reflex|GO:0060117,auditory receptor cell development|GO:0070588,calcium ion transmembrane transport|GO:1903169,regulation of calcium ion transmembrane transport	GO:0005245,voltage-gated calcium channel activity|GO:0008381,mechanically-gated ion channel activity	GO:0009897,external side of plasma membrane|GO:0016021,integral component of membrane|GO:0032426,stereocilium tip
TMC2	31.2934	39.6893	12.6093	28.6664	16.4499	28.7513	32.151	0	61.1043	40.0558	18.0115	66.8272	31.4536	34.3279	8.80842	21.6202	70.4607	15.1502	62.2635	30.0446	29.0771	35.8968	32.4869	0.300238	0.476532	0.630049	0.528662	0.720178	Not DEG	GO:0050910,detection of mechanical stimulus involved in sensory perception of sound|GO:0060005,vestibular reflex|GO:0070588,calcium ion transmembrane transport|GO:1903169,regulation of calcium ion transmembrane transport	GO:0003674,molecular_function|GO:0005245,voltage-gated calcium channel activity|GO:0008381,mechanically-gated ion channel activity	GO:0005575,cellular_component|GO:0005886,plasma membrane|GO:0016021,integral component of membrane|GO:0032426,stereocilium tip
TMC3	85.079	169.974	160.558	51.2521	112.799	131.072	166.709	52.7448	90.8308	104.691	85.2545	91.6487	76.7838	23.5583	101.297	126.773	4948.16	101.723	1399.82	31.2964	112.571	698.631	163.478	0.928808	0.564474	1.64544	0.0998796	0.252511	Not DEG	GO:0006811,ion transport		GO:0016021,integral component of membrane
LRRC46	223.944	121.656	116.005	99.0295	142.174	187.729	226.247	137.382	85.0506	242.156	68.4438	147.02	209.999	152.12	123.318	194.582	138.649	190.46	92.2834	170.253	158.137	148.713	153.425	-0.0864084	0.234281	-0.368824	0.712259	0.846711	Not DEG	GO:0031647,regulation of protein stability|GO:1903955,positive regulation of protein targeting to mitochondrion
TMEM200A	338.36	142.364	328.682	166.787	603.946	420.277	311.983	366.761	229.554	221.217	467.099	162.295	1995.45	1502.35	548.324	637.795	658.012	1085.4	902.821	957.671	312.993	891.722	602.358	1.5113	0.335132	4.50957	6.49602e-06	0.000190462	Up			GO:0016021,integral component of membrane
EIF2B4	1528.49	1453.84	1463.52	1475.89	1775.41	1238	1422.98	1377.5	1511.92	1336.41	1730.31	1432.97	2187.88	1754.09	1448.99	1206.8	1386.49	1786.64	1413.16	2096.86	1458.39	1644.42	1551.41	0.173341	0.107905	1.60642	0.108181	0.26599	Not DEG	GO:0001541,ovarian follicle development|GO:0006413,translational initiation|GO:0006417,regulation of translation|GO:0009408,response to heat|GO:0009408,response to heat|GO:0009749,response to glucose|GO:0014003,oligodendrocyte development|GO:0032057,negative regulation of translational initiation in response to stress|GO:0042552,myelination|GO:0043434,response to peptide hormone|GO:0051716,cellul…	GO:0003743,translation initiation factor activity|GO:0005085,guanyl-nucleotide exchange factor activity|GO:0005085,guanyl-nucleotide exchange factor activity|GO:0005515,protein binding|GO:0031369,translation initiation factor binding	GO:0005737,cytoplasm|GO:0005829,cytosol|GO:0005851,eukaryotic translation initiation factor 2B complex	path:hsa03013 RNA transport - Homo sapiens (human)
NFATC2IP	2628.65	2049.18	2407.53	2571.29	2012.76	2169.88	2561.36	2427.49	2609.32	1909.02	2566.04	2248.26	2495.94	2459.49	2269.27	2132.54	2603.64	3150.16	2798.52	2717.78	2334.65	2544.16	2439.41	0.123807	0.0859246	1.44088	0.149619	0.328356	Not DEG	GO:0001816,cytokine production|GO:0016925,protein sumoylation|GO:0045944,positive regulation of transcription from RNA polymerase II promoter	GO:0031386,protein tag	GO:0005634,nucleus|GO:0005737,cytoplasm
TMC8	742.241	71.6134	1274.38	198.059	420.647	173.354	304.839	214.659	1954.51	247.618	628.002	557.529	1064.8	963.872	590.164	481.54	2205.88	1226.08	2547.24	3869.49	560.192	1413.46	986.826	1.33491	0.503671	2.65035	0.00804074	0.0445389	Up	GO:0001558,regulation of cell growth|GO:0006811,ion transport|GO:0032091,negative regulation of protein binding|GO:0032460,negative regulation of protein oligomerization|GO:0055069,zinc ion homeostasis|GO:1902041,regulation of extrinsic apoptotic signaling pathway via death domain receptors	GO:0005102,receptor binding|GO:0005515,protein binding	GO:0005615,extracellular space|GO:0005737,cytoplasm|GO:0005783,endoplasmic reticulum|GO:0005789,endoplasmic reticulum membrane|GO:0005794,Golgi apparatus|GO:0016021,integral component of membrane|GO:0031965,nuclear membrane|GO:0070062,extracellular exosome
EIF2B3	1340.73	1155.3	1352.55	1277.83	1250.19	1289.58	1313.43	1170.2	1416.13	1298.17	1595.82	1019.59	1346.03	1523.21	1161.61	1076.1	1720.61	1228.25	1682.23	1561.07	1286.41	1391.45	1338.93	0.112757	0.101	1.11641	0.264248	0.476706	Not DEG	GO:0006413,translational initiation|GO:0009408,response to heat|GO:0009408,response to heat|GO:0009749,response to glucose|GO:0014003,oligodendrocyte development|GO:0021766,hippocampus development|GO:0032057,negative regulation of translational initiation in response to stress|GO:0043434,response to peptide hormone|GO:0051716,cellular response to stimulus|GO:0065009,regulation of molecular functi…	GO:0003743,translation initiation factor activity|GO:0005085,guanyl-nucleotide exchange factor activity|GO:0005085,guanyl-nucleotide exchange factor activity|GO:0005515,protein binding|GO:0008135,translation factor activity, RNA binding|GO:0016779,nucleotidyltransferase activity	GO:0005737,cytoplasm|GO:0005829,cytosol|GO:0005851,eukaryotic translation initiation factor 2B complex	path:hsa03013 RNA transport - Homo sapiens (human)
EIF2B1	2736.22	2734.25	2526.9	2217.74	2864.63	2431.18	2775.7	2831.05	2975.95	2920.43	3029.54	2761.87	3128.71	3040.37	2795.57	3062.2	2824.11	2508.44	2782.96	2926.84	2701.4	2886.06	2793.73	0.0958499	0.0613417	1.56256	0.118157	0.282131	Not DEG	GO:0006413,translational initiation|GO:0009408,response to heat|GO:0009408,response to heat|GO:0009749,response to glucose|GO:0014003,oligodendrocyte development|GO:0043434,response to peptide hormone|GO:0051716,cellular response to stimulus|GO:0065009,regulation of molecular function	GO:0003743,translation initiation factor activity|GO:0005085,guanyl-nucleotide exchange factor activity|GO:0005515,protein binding|GO:0042802,identical protein binding	GO:0005737,cytoplasm|GO:0005829,cytosol|GO:0005851,eukaryotic translation initiation factor 2B complex|GO:0005886,plasma membrane|GO:0016020,membrane	path:hsa03013 RNA transport - Homo sapiens (human)
PRKAR2A	2779.25	5768.76	6479.48	3497.31	3575.5	6381.95	2524.45	6528.09	6584.41	2966.86	4339.57	3530.38	4445.14	3467.11	4345.86	7003.95	2618.41	2053.94	2498.32	2467.41	4708.61	3677.01	4192.81	-0.356764	0.242076	-1.47377	0.140543	0.314479	Not DEG	GO:0003091,renal water homeostasis|GO:0007596,blood coagulation|GO:0034199,activation of protein kinase A activity|GO:0035556,intracellular signal transduction|GO:0071377,cellular response to glucagon stimulus|GO:2000480,negative regulation of cAMP-dependent protein kinase activity	GO:0004862,cAMP-dependent protein kinase inhibitor activity|GO:0005515,protein binding|GO:0008603,cAMP-dependent protein kinase regulator activity|GO:0008603,cAMP-dependent protein kinase regulator activity|GO:0019904,protein domain specific binding|GO:0030552,cAMP binding|GO:0031625,ubiquitin protein ligase binding|GO:0034236,protein kinase A catalytic subunit binding	GO:0005737,cytoplasm|GO:0005813,centrosome|GO:0005829,cytosol|GO:0005886,plasma membrane|GO:0005925,focal adhesion|GO:0005930,axoneme|GO:0005952,cAMP-dependent protein kinase complex|GO:0016020,membrane|GO:0031588,nucleotide-activated protein kinase complex|GO:0043234,protein complex|GO:0044853,plasma membrane raft|GO:0070062,extracellular exosome|GO:0097546,ciliary base	path:hsa04910 Insulin signaling pathway - Homo sapiens (human)
PRKAR2B	706.058	566.867	627.101	558.561	566.346	764.448	640.638	691.816	772.887	712.812	521.133	663.498	254.404	339.913	733.301	932.616	1356.94	497.792	1115.18	373.053	660.753	678.783	669.768	0.0384391	0.246715	0.155804	0.876188	0.93881	Not DEG	GO:0000086,G2/M transition of mitotic cell cycle|GO:0003091,renal water homeostasis|GO:0006631,fatty acid metabolic process|GO:0007596,blood coagulation|GO:0007612,learning|GO:0010389,regulation of G2/M transition of mitotic cell cycle|GO:0034199,activation of protein kinase A activity|GO:0035556,intracellular signal transduction|GO:0071377,cellular response to glucagon stimulus|GO:0097332,respon…	GO:0004862,cAMP-dependent protein kinase inhibitor activity|GO:0005515,protein binding|GO:0008603,cAMP-dependent protein kinase regulator activity|GO:0019904,protein domain specific binding|GO:0030552,cAMP binding|GO:0031625,ubiquitin protein ligase binding|GO:0034236,protein kinase A catalytic subunit binding	GO:0005737,cytoplasm|GO:0005743,mitochondrial inner membrane|GO:0005813,centrosome|GO:0005829,cytosol|GO:0005886,plasma membrane|GO:0005952,cAMP-dependent protein kinase complex|GO:0043025,neuronal cell body|GO:0043197,dendritic spine|GO:0043198,dendritic shaft|GO:0045121,membrane raft|GO:0048471,perinuclear region of cytoplasm|GO:0070062,extracellular exosome|GO:0097546,ciliary base	path:hsa04910 Insulin signaling pathway - Homo sapiens (human)
CRYBG3	54022.2	80175	51693	42794.7	89651.9	38322.2	41734.3	49462.4	41787.1	45576.3	55085.2	45130.3	27052.9	52208	73748.5	34998.1	17244.7	22991.5	17314.8	41219.9	53521.9	38699.4	46110.6	-0.467814	0.252311	-1.85412	0.0637224	0.186991	Not DEG	GO:0008150,biological_process	GO:0030246,carbohydrate binding|GO:0051018,protein kinase A binding	GO:0043234,protein complex
SLC4A9	48.896	34.5125	66.4088	47.7774	4.69997	96.4016	85.7359	57.6513	36.3323	76.4702	0	27.6855	31.4536	34.3279	34.1326	69.7742	48.8679	101.723	23.3488	23.7853	55.4886	39.5099	47.4992	-0.489543	0.493159	-0.992666	0.320873	0.536477	Not DEG	GO:0015698,inorganic anion transport|GO:0015701,bicarbonate transport|GO:0035725,sodium ion transmembrane transport|GO:0051453,regulation of intracellular pH|GO:0098656,anion transmembrane transport	GO:0005452,inorganic anion exchanger activity|GO:0008510,sodium:bicarbonate symporter activity|GO:0008510,sodium:bicarbonate symporter activity|GO:0015301,anion:anion antiporter activity	GO:0005886,plasma membrane|GO:0005887,integral component of plasma membrane|GO:0045177,apical part of cell
TXNIP	44121.8	42655.7	32650.4	31019.7	45263	34179.4	39011	51670.3	84963.9	38010.3	64097	46122.2	22333.9	45635.9	48797.6	48399.7	97165.4	76696.8	120815	48306.7	44354.6	61837	53095.8	0.479383	0.246421	1.94538	0.0517292	0.161915	Not DEG	GO:0000122,negative regulation of transcription from RNA polymerase II promoter|GO:0006351,transcription, DNA-templated|GO:0006606,protein import into nucleus|GO:0007049,cell cycle|GO:0009612,response to mechanical stimulus|GO:0009749,response to glucose|GO:0030216,keratinocyte differentiation|GO:0032355,response to estradiol|GO:0032570,response to progesterone|GO:0042127,regulation of cell proli…	GO:0004857,enzyme inhibitor activity|GO:0005515,protein binding|GO:0031625,ubiquitin protein ligase binding	GO:0005634,nucleus|GO:0005737,cytoplasm|GO:0005758,mitochondrial intermembrane space|GO:0005829,cytosol	path:hsa04621 NOD-like receptor signaling pathway - Homo sapiens (human)
CRYBG2	10.7571	11.2165	41.1903	11.2928	37.5997	3.38251	47.631	0	16.5147	20.9383	336.215	60.1444	40.7047	130.58	47.3453	18.672	9.09171	83.3261	30.0199	118.926	20.0523	87.5026	53.7775	2.12734	0.610692	3.4835	0.000494909	0.00583595	Up		GO:0030246,carbohydrate binding
MALRD1	131.041	63.848	142.905	156.362	180.949	130.227	253.635	285.803	271.667	499.788	127.281	144.156	134.14	80.0983	175.067	142.497	223.883	327.894	120.08	156.482	211.623	163.158	187.39	-0.375666	0.308473	-1.21783	0.22329	0.427274	Not DEG	GO:0042632,cholesterol homeostasis|GO:0070858,negative regulation of bile acid biosynthetic process		GO:0005794,Golgi apparatus|GO:0016021,integral component of membrane|GO:0030659,cytoplasmic vesicle membrane
MLF1	1178.39	1106.12	1121.38	1801.64	1387.67	1400.36	1152.67	1573.76	826.56	1246.28	1087.9	1095.97	604.094	410.588	1410.45	1214.66	487.543	445.849	346.897	322.979	1279.48	742.692	1011.09	-0.784705	0.265786	-2.95239	0.00315324	0.022738	Not DEG	GO:0002318,myeloid progenitor cell differentiation|GO:0006351,transcription, DNA-templated|GO:0007050,cell cycle arrest	GO:0003677,DNA binding|GO:0005515,protein binding|GO:0019904,protein domain specific binding	GO:0005634,nucleus|GO:0005634,nucleus|GO:0005737,cytoplasm	path:hsa05202 Transcriptional misregulation in cancer - Homo sapiens (human)
QPRT	269.906	276.1	199.226	477.774	148.049	153.059	83.3543	110.396	238.637	200.279	139.289	266.354	83.2596	68.6557	126.621	93.3598	287.525	133.105	130.086	588.373	215.678	191.663	203.67	-0.172707	0.374647	-0.460985	0.644809	0.801525	Not DEG	GO:0009435,NAD biosynthetic process|GO:0009435,NAD biosynthetic process|GO:0019674,NAD metabolic process|GO:0034213,quinolinate catabolic process|GO:0051259,protein oligomerization	GO:0004514,nicotinate-nucleotide diphosphorylase (carboxylating) activity|GO:0004514,nicotinate-nucleotide diphosphorylase (carboxylating) activity|GO:0042803,protein homodimerization activity	GO:0005737,cytoplasm|GO:0005829,cytosol|GO:0070062,extracellular exosome	path:hsa00760 Nicotinate and nicotinamide metabolism - Homo sapiens (human)|path:hsa01100 Metabolic pathways - Homo sapiens (human)
IFT140	8097.17	6938.73	5098.35	7492.37	5249.86	6471.59	7403.05	6308.53	4488.69	7722.58	3800.43	5482.69	3857.69	3658.27	4482.39	5648.76	3609.41	4174.96	2680.67	3718.02	6527.09	4111.33	5319.21	-0.666775	0.139343	-4.78514	1.70868e-06	6.40868e-05	Not DEG	GO:0007368,determination of left/right symmetry|GO:0007507,heart development|GO:0008589,regulation of smoothened signaling pathway|GO:0021532,neural tube patterning|GO:0031076,embryonic camera-type eye development|GO:0035721,intraciliary retrograde transport|GO:0035735,intraciliary transport involved in cilium assembly|GO:0035845,photoreceptor cell outer segment organization|GO:0042733,embryonic …	GO:0003674,molecular_function	GO:0001750,photoreceptor outer segment|GO:0005737,cytoplasm|GO:0005813,centrosome|GO:0005929,cilium|GO:0005930,axoneme|GO:0005930,axoneme|GO:0030991,intraciliary transport particle A|GO:0032391,photoreceptor connecting cilium|GO:0036064,ciliary basal body|GO:0097542,ciliary tip
RSPH9	53.7856	37.1009	42.8715	70.3631	24.6748	34.6707	42.8679	31.8922	18.9919	29.1315	22.8146	41.051	14.8017	32.3086	29.7284	43.2403	44.3221	62.7651	40.0265	56.3336	38.635	38.7392	38.6871	-0.00132214	0.279305	-0.0047337	0.996223	0.997827	Not DEG	GO:0003341,cilium movement|GO:0035082,axoneme assembly|GO:0044458,motile cilium assembly|GO:0060294,cilium movement involved in cell motility	GO:0005515,protein binding	GO:0005737,cytoplasm|GO:0005930,axoneme|GO:0031514,motile cilium
TMEM14C	2526.94	3134.59	3095.16	2858.83	2149.06	2352.54	2319.63	2374.74	2437.57	3313.71	3847.26	2396.23	2204.53	3123.83	2564.35	2556.09	2151.33	1670.85	2245.93	1974.18	2656.28	2473.46	2564.87	-0.102948	0.136005	-0.756939	0.449086	0.658772	Not DEG	GO:0006783,heme biosynthetic process	GO:0005515,protein binding	GO:0016021,integral component of membrane|GO:0031966,mitochondrial membrane
TMEM14B	3246.69	4193.26	3541.52	3785.71	2985.65	3219.31	3516.36	2455.7	3099.81	3972.81	3082.37	2858.29	2413.6	2779.21	3197.46	3225.34	2565	1634.06	1981.31	2025.5	3401.68	2576.21	2988.95	-0.401016	0.131346	-3.05313	0.00226467	0.0180424	Not DEG			GO:0016021,integral component of membrane
TMEM14A	200.473	368.42	506.052	275.372	227.948	273.983	352.47	390.066	274.144	318.626	172.911	275.901	120.264	205.967	232.322	487.437	245.476	168.817	196.797	156.482	318.756	226.237	272.496	-0.494126	0.226162	-2.18483	0.028901	0.108327	Not DEG	GO:0006915,apoptotic process|GO:0043066,negative regulation of apoptotic process|GO:1901029,negative regulation of mitochondrial outer membrane permeabilization involved in apoptotic signaling pathway	GO:0005515,protein binding	GO:0005789,endoplasmic reticulum membrane|GO:0016021,integral component of membrane|GO:0031966,mitochondrial membrane
FANCF	760.821	1016.39	1112.14	448.239	748.47	931.882	929.996	666.057	882.71	903.077	662.824	814.337	637.398	915.409	881.943	1185.18	876.213	610.337	682.675	667.24	839.978	793.356	816.667	-0.0822686	0.156748	-0.524846	0.59969	0.771753	Not DEG	GO:0001541,ovarian follicle development|GO:0007283,spermatogenesis|GO:0008150,biological_process|GO:0016567,protein ubiquitination|GO:0036297,interstrand cross-link repair	GO:0003674,molecular_function|GO:0005515,protein binding|GO:0061630,ubiquitin protein ligase activity	GO:0005654,nucleoplasm|GO:0043240,Fanconi anaemia nuclear complex	path:hsa03460 Fanconi anemia pathway - Homo sapiens (human)
MECOM	739.307	1568.59	1127.27	920.801	1089.22	1226.16	2104.1	1452.32	1047.86	913.091	1874.4	1946.58	1933.47	2395.55	1543.68	1553.7	3974.21	3731.28	2868.57	1731.32	1218.87	2355.28	1787.07	0.950564	0.213516	4.45196	8.50882e-06	0.00023219	Not DEG	GO:0006351,transcription, DNA-templated|GO:0006915,apoptotic process|GO:0030154,cell differentiation|GO:0034968,histone lysine methylation|GO:0043069,negative regulation of programmed cell death|GO:0045892,negative regulation of transcription, DNA-templated|GO:0045893,positive regulation of transcription, DNA-templated|GO:0046329,negative regulation of JNK cascade|GO:0051726,regulation of cell cy…	GO:0003677,DNA binding|GO:0003700,DNA binding transcription factor activity|GO:0005515,protein binding|GO:0018024,histone-lysine N-methyltransferase activity|GO:0046872,metal ion binding	GO:0000118,histone deacetylase complex|GO:0005634,nucleus|GO:0005654,nucleoplasm|GO:0005829,cytosol|GO:0016607,nuclear speck	path:hsa04010 MAPK signaling pathway - Homo sapiens (human)|path:hsa05200 Pathways in cancer - Homo sapiens (human)|path:hsa05220 Chronic myeloid leukemia - Homo sapiens (human)
RSPH3	1659.53	3556.51	2952.25	3374.82	1748.39	3235.37	3644.97	1408.16	2264.99	2927.72	2640.49	3504.61	1421.89	3131.91	3282.24	4229.69	3549.18	2456.5	1736.71	2023	2677.27	2797.62	2737.45	0.0633883	0.216015	0.293443	0.769183	0.880984	Not DEG		GO:0005515,protein binding	GO:0005737,cytoplasm|GO:0005856,cytoskeleton|GO:0042995,cell projection
RSPH1	705.08	520.275	420.309	1004.19	475.872	595.322	813.3	445.265	359.194	607.21	314.601	547.028	503.258	189.813	409.592	468.765	412.536	256.471	260.173	475.706	594.602	383.794	489.198	-0.631887	0.215957	-2.92599	0.00343365	0.0242158	Not DEG	GO:0007286,spermatid development|GO:0035082,axoneme assembly|GO:0051321,meiotic cell cycle	GO:0005515,protein binding	GO:0000794,condensed nuclear chromosome|GO:0001520,outer dense fiber|GO:0005634,nucleus|GO:0005829,cytosol|GO:0031514,motile cilium|GO:0072687,meiotic spindle
FANCE	313.912	320.103	375.756	416.098	413.597	341.634	313.174	360.628	441.768	252.17	341.018	402.872	783.565	697.327	304.992	284.01	248.885	387.412	452.522	479.461	354.884	438.207	396.545	0.305475	0.196241	1.55663	0.119557	0.284651	Not DEG	GO:0036297,interstrand cross-link repair	GO:0003674,molecular_function	GO:0005634,nucleus|GO:0005654,nucleoplasm|GO:0043240,Fanconi anaemia nuclear complex	path:hsa03460 Fanconi anemia pathway - Homo sapiens (human)
GTPBP8	695.301	918.031	1050.77	475.168	817.794	928.499	928.805	823.065	729.949	759.24	1170.75	787.606	933.432	1485.52	847.811	797.981	1069.41	747.771	1112.96	863.781	812.663	981.702	897.182	0.273136	0.148336	1.84134	0.065572	0.190613	Not DEG		GO:0005525,GTP binding|GO:0046872,metal ion binding	GO:0005739,mitochondrion|GO:0005739,mitochondrion
TTC1	2379.28	2901.63	2103.23	2940.48	2669.58	2442.17	2386.32	1896.36	2833.92	2307.76	2525.21	2571.89	2839.15	2524.78	2156.96	2290.76	2491.13	2066.92	2572.82	3147.17	2486.07	2518.68	2502.38	0.018506	0.095224	0.194342	0.845908	0.924078	Not DEG	GO:0006457,protein folding	GO:0005515,protein binding|GO:0051082,unfolded protein binding	GO:0005778,peroxisomal membrane|GO:0005829,cytosol
LURAP1	1211.64	1391.71	1259.25	1404.66	1435.84	1325.1	1358.68	1598.29	791.053	1457.49	1128.72	1040.59	688.279	745.116	1498.53	1168.47	721.654	943.641	613.74	913.856	1323.37	946.261	1134.82	-0.483935	0.158731	-3.04878	0.00229776	0.0182139	Not DEG	GO:0001819,positive regulation of cytokine production|GO:0016477,cell migration|GO:0031032,actomyosin structure organization|GO:0043123,positive regulation of I-kappaB kinase/NF-kappaB signaling	GO:0005515,protein binding	GO:0005737,cytoplasm|GO:0042641,actomyosin
TPBGL	15.6467	11.2165	13.4499	17.3736	34.0748	16.9126	13.0985	0	29.7264	15.4761	24.0154	19.0935	4.62553	8.07714	22.0211	15.7238	10.2282	30.3004	34.4673	16.2741	16.6975	18.4826	17.5901	0.137314	0.439688	0.312299	0.754813	0.872677	Not DEG			GO:0016021,integral component of membrane
ITGA1	10901.8	11162.2	10089.1	7760.79	12439.6	13773.6	12575.8	14127	9813.85	13355	6765.13	11656.6	6954.02	6989.42	13459.3	16335	13002.3	11214.4	8914.8	7906.73	11599.9	10319.8	10959.8	-0.168685	0.170478	-0.98948	0.322428	0.538074	Not DEG	GO:0000187,activation of MAPK activity|GO:0006936,muscle contraction|GO:0007160,cell-matrix adhesion|GO:0007229,integrin-mediated signaling pathway|GO:0008285,negative regulation of cell proliferation|GO:0030198,extracellular matrix organization|GO:0030593,neutrophil chemotaxis|GO:0032516,positive regulation of phosphoprotein phosphatase activity|GO:0042059,negative regulation of epidermal growth…	GO:0005102,receptor binding|GO:0005515,protein binding|GO:0005518,collagen binding|GO:0019903,protein phosphatase binding|GO:0046872,metal ion binding|GO:0098639,collagen binding involved in cell-matrix adhesion	GO:0001669,acrosomal vesicle|GO:0005886,plasma membrane|GO:0005925,focal adhesion|GO:0008305,integrin complex|GO:0009897,external side of plasma membrane|GO:0009986,cell surface|GO:0016020,membrane|GO:0034665,integrin alpha1-beta1 complex|GO:0043005,neuron projection|GO:0043204,perikaryon|GO:0045121,membrane raft|GO:0045178,basal part of cell|GO:0070062,extracellular exosome	path:hsa04151 PI3K-Akt signaling pathway - Homo sapiens (human)|path:hsa04510 Focal adhesion - Homo sapiens (human)|path:hsa04512 ECM-receptor interaction - Homo sapiens (human)|path:hsa04640 Hematopoietic cell lineage - Homo sapiens (human)|path:hsa04810 Regulation of actin cytoskeleton - Homo sapiens (human)|path:hsa05410 Hypertrophic cardiomyopathy (HCM) - Homo sapiens (human)|path:hsa05412 Ar…
MYT1L	15.6467	0	10.0874	23.4544	3.52498	0	5.95388	4.9065	3.30294	15.4761	15.61	8.59206	0.925106	0	0	20.6374	0	0	2.2237	0	8.23529	4.79883	6.51706	-0.781748	1.10421	-0.70797	0.478964	0.68152	Not DEG	GO:0000122,negative regulation of transcription from RNA polymerase II promoter|GO:0006351,transcription, DNA-templated|GO:0006357,regulation of transcription from RNA polymerase II promoter|GO:0007399,nervous system development|GO:0030182,neuron differentiation|GO:0048663,neuron fate commitment|GO:0048665,neuron fate specification|GO:0048666,neuron development	GO:0001078,transcriptional repressor activity, RNA polymerase II proximal promoter sequence-specific DNA binding|GO:0003677,DNA binding|GO:0008270,zinc ion binding	GO:0005634,nucleus|GO:0005694,chromosome
ABCA12	161.357	134.599	88.2649	39.0906	72.8495	91.3278	152.419	130.022	108.997	98.3189	856.147	172.796	646.649	359.433	53.9516	115.963	209.109	230.5	274.627	338.001	107.725	325.718	216.721	1.59682	0.374242	4.2668	1.98301e-05	0.00046007	Up	GO:0006869,lipid transport|GO:0006869,lipid transport|GO:0010875,positive regulation of cholesterol efflux|GO:0019725,cellular homeostasis|GO:0031424,keratinization|GO:0032940,secretion by cell|GO:0033700,phospholipid efflux|GO:0035627,ceramide transport|GO:0043129,surfactant homeostasis|GO:0045055,regulated exocytosis|GO:0048286,lung alveolus development|GO:0055085,transmembrane transport|GO:005…	GO:0005102,receptor binding|GO:0005319,lipid transporter activity|GO:0005319,lipid transporter activity|GO:0005515,protein binding|GO:0005524,ATP binding|GO:0034040,lipid-transporting ATPase activity|GO:0034191,apolipoprotein A-I receptor binding|GO:0042626,ATPase activity, coupled to transmembrane movement of substances	GO:0005737,cytoplasm|GO:0005743,mitochondrial inner membrane|GO:0005829,cytosol|GO:0005886,plasma membrane|GO:0005886,plasma membrane|GO:0016021,integral component of membrane|GO:0043231,intracellular membrane-bounded organelle|GO:0097209,epidermal lamellar body	path:hsa02010 ABC transporters - Homo sapiens (human)
CFHR2	0	2.58843	0	2.60604	0	0	0	0	0	0	0	0	0	0	0	5.89641	0	0	0	0	0.519447	0.589641	0.554544	0.14281	3.00793	0.047478	0.962132	NA	Not DEG	GO:0030449,regulation of complement activation|GO:0032091,negative regulation of protein binding|GO:0045919,positive regulation of cytolysis	GO:0005515,protein binding|GO:0042803,protein homodimerization activity|GO:0046982,protein heterodimerization activity	GO:0005576,extracellular region|GO:0043234,protein complex
CFHR3	0	0	94.1492	4.3434	223.248	132.764	107.17	0	117.254	111.974	207.733	124.108	4.62553	150.773	150.844	244.701	118.192	213.185	16.6777	157.734	79.0903	138.857	108.974	0.812168	0.843872	0.962431	0.335833	0.552432	Not DEG			GO:0005615,extracellular space|GO:0070062,extracellular exosome|GO:0072562,blood microparticle
CLIC4	7408.72	5905.08	6545.89	4262.61	9594.98	9737.41	9374.98	9409.43	8332.48	8005.71	9501.68	10067	10519.4	17203.6	11436.6	14513	12968.2	13841.9	12562.8	8220.94	7857.73	12083.5	9970.62	0.620961	0.157887	3.93294	8.39137e-05	0.00143824	Not DEG	GO:0001525,angiogenesis|GO:0001886,endothelial cell morphogenesis|GO:0006749,glutathione metabolic process|GO:0006821,chloride transport|GO:0007035,vacuolar acidification|GO:0009566,fertilization|GO:0030154,cell differentiation|GO:0030216,keratinocyte differentiation|GO:0030336,negative regulation of cell migration|GO:0034765,regulation of ion transmembrane transport|GO:0035088,establishment or m…	GO:0004364,glutathione transferase activity|GO:0005244,voltage-gated ion channel activity|GO:0005254,chloride channel activity|GO:0005515,protein binding	GO:0005622,intracellular|GO:0005737,cytoplasm|GO:0005739,mitochondrion|GO:0005813,centrosome|GO:0005829,cytosol|GO:0005886,plasma membrane|GO:0005902,microvillus|GO:0005911,cell-cell junction|GO:0009986,cell surface|GO:0015629,actin cytoskeleton|GO:0015630,microtubule cytoskeleton|GO:0016363,nuclear matrix|GO:0030496,midbody|GO:0030659,cytoplasmic vesicle membrane|GO:0034707,chloride channel comp…
CLIC5	1553.91	3966.34	9798.24	5436.2	7550.5	5642.03	6213.47	8182.81	5585.27	6397.1	18774	6189.15	1677.22	2824.31	6516.03	5251.74	1556.95	4539.65	2688.45	1299.43	6032.59	5131.69	5582.14	-0.233363	0.400909	-0.582084	0.56051	0.744561	Not DEG	GO:0006749,glutathione metabolic process|GO:0006810,transport|GO:0006821,chloride transport|GO:0007565,female pregnancy|GO:0007605,sensory perception of sound|GO:0034765,regulation of ion transmembrane transport|GO:0060088,auditory receptor cell stereocilium organization|GO:1902476,chloride transmembrane transport	GO:0004364,glutathione transferase activity|GO:0005244,voltage-gated ion channel activity|GO:0005254,chloride channel activity|GO:0005515,protein binding	GO:0005634,nucleus|GO:0005737,cytoplasm|GO:0005794,Golgi apparatus|GO:0005815,microtubule organizing center|GO:0005938,cell cortex|GO:0015629,actin cytoskeleton|GO:0034707,chloride channel complex|GO:0070062,extracellular exosome
PHACTR1	620.001	305.435	443.006	765.307	536.971	437.19	577.526	282.124	909.959	251.259	446.686	535.572	706.781	551.938	572.547	508.074	944.401	907.93	1496.55	522.024	512.878	719.25	616.064	0.487516	0.259927	1.87559	0.0607114	0.180923	Not DEG	GO:0031032,actomyosin structure organization|GO:0031532,actin cytoskeleton reorganization|GO:0043086,negative regulation of catalytic activity|GO:0043149,stress fiber assembly|GO:0048870,cell motility	GO:0003779,actin binding|GO:0004864,protein phosphatase inhibitor activity|GO:0008157,protein phosphatase 1 binding	GO:0005634,nucleus|GO:0005829,cytosol|GO:0030054,cell junction|GO:0045202,synapse
CLIC3	837.099	1112.16	1712.34	1499.34	939.993	1327.64	1141.95	1107.64	920.694	3007.83	605.187	696.912	1285.9	741.078	1105.46	1188.13	364.805	1291.01	334.666	1449.65	1360.67	906.279	1133.47	-0.586416	0.282139	-2.07847	0.0376664	0.13025	Not DEG	GO:0006749,glutathione metabolic process|GO:0006821,chloride transport|GO:0007165,signal transduction|GO:0034765,regulation of ion transmembrane transport|GO:1902476,chloride transmembrane transport	GO:0004364,glutathione transferase activity|GO:0005244,voltage-gated ion channel activity|GO:0005254,chloride channel activity|GO:0005515,protein binding	GO:0005634,nucleus|GO:0005737,cytoplasm|GO:0016604,nuclear body|GO:0034707,chloride channel complex|GO:0070062,extracellular exosome
PHACTR3	14.6688	18.119	14.2905	64.2823	29.3748	26.2145	11.9078	17.1727	12.386	10.9243	525.936	174.705	39.7796	162.216	11.0105	43.2403	23.8657	106.051	368.022	206.556	21.9341	166.138	94.0362	2.91917	0.541477	5.39112	7.00197e-08	4.47713e-06	Up	GO:0043086,negative regulation of catalytic activity	GO:0003779,actin binding|GO:0004864,protein phosphatase inhibitor activity|GO:0008157,protein phosphatase 1 binding	GO:0005654,nucleoplasm|GO:0016363,nuclear matrix
CFHR5	0	0	0	0	0	0	4.7631	0	0	0	0	0	0	0	0	0	4.54585	0	0	0	0.47631	0.454585	0.465448	0.130213	3.02466	0.0430504	0.965661	NA	Not DEG	GO:0006957,complement activation, alternative pathway|GO:0030449,regulation of complement activation|GO:0032091,negative regulation of protein binding|GO:0045919,positive regulation of cytolysis	GO:0005515,protein binding|GO:0042803,protein homodimerization activity|GO:0046982,protein heterodimerization activity	GO:0005576,extracellular region|GO:0005576,extracellular region|GO:0043234,protein complex
KRTAP2-3	0	0	0	3.47472	4.69997	0	0	9.81299	0	0	0	0	0	12.1157	0	0	4.54585	35.7112	0	0	1.79877	5.23728	3.51802	1.55579	2.11413	0.735899	0.461792	NA	Not DEG	GO:0031424,keratinization	GO:0005515,protein binding	GO:0005829,cytosol|GO:0045095,keratin filament
KRTAP2-2	0	0	0	0	0	0	0	0	0	0	0	0	0	2.69238	0	0	1.13646	0	0	0	0	0.382884	0.191442	1.32103	3.02452	0.436775	0.662274	NA	Not DEG
KRTAP2-1	0	0	3.36247	0	0	0	0	0	0	1.82072	0	0	0	0	4.40421	0	1.13646	0	0	0	0.518319	0.554067	0.536193	0.0552399	3.01087	0.0183468	0.985362	NA	Not DEG	GO:0031424,keratinization		GO:0005829,cytosol|GO:0045095,keratin filament
KRTAP2-4	0	0	0	0	0	0	0	0	0	0	0	0	0	0	0	0	2.27293	0	0	0	0	0.227293	0.113646	0.674654	3.02619	0.222939	0.823583	NA	Not DEG	GO:0031424,keratinization		GO:0005829,cytosol|GO:0045095,keratin filament
TMEM147	848.834	1526.31	1855.24	1352.54	774.32	983.465	733.518	1431.47	930.603	1550.34	529.539	924.124	1324.75	995.508	1007.46	920.823	637.556	857.069	611.517	1109.15	1198.66	891.75	1045.21	-0.426681	0.199924	-2.13422	0.0328252	0.118548	Not DEG	GO:0031648,protein destabilization	GO:0005515,protein binding	GO:0005789,endoplasmic reticulum membrane|GO:0016021,integral component of membrane
ASGR1	89.9686	110.44	43.7121	79.9186	0	27.0601	72.6373	23.3059	19.8176	110.154	38.4246	78.2832	35.154	8.75024	18.7179	32.4303	47.7315	67.0938	44.4739	52.578	57.7014	42.3637	50.0326	-0.448571	0.509981	-0.879583	0.379085	0.59565	Not DEG	GO:0006898,receptor-mediated endocytosis|GO:0018279,protein N-linked glycosylation via asparagine|GO:0031668,cellular response to extracellular stimulus	GO:0004873,asialoglycoprotein receptor activity|GO:0005515,protein binding|GO:0030246,carbohydrate binding|GO:0042803,protein homodimerization activity|GO:0046872,metal ion binding	GO:0005576,extracellular region|GO:0005886,plasma membrane|GO:0005887,integral component of plasma membrane	path:hsa04918 Thyroid hormone synthesis - Homo sapiens (human)
TMEM145	9.77919	8.62811	10.0874	23.4544	3.52498	10.1475	15.4801	6.13312	7.43161	6.37252	7.20461	8.59206	0	10.0964	2.20211	20.6374	64.7784	25.9718	18.9014	6.25929	10.1039	16.4644	13.2841	0.698106	0.596004	1.17131	0.241474	0.450271	Not DEG	GO:0007186,G-protein coupled receptor signaling pathway|GO:0019236,response to pheromone		GO:0016021,integral component of membrane
TMEM144	1678.11	2559.1	1919.97	1739.97	1375.92	2108.15	2911.45	2232.46	1472.28	2551.74	2947.89	2287.4	2113.87	2760.36	1604.23	2369.37	1975.17	1511.77	1277.51	3194.74	2054.91	2204.23	2129.57	0.101272	0.179417	0.564453	0.572446	0.753063	Not DEG	GO:0034219,carbohydrate transmembrane transport	GO:0015144,carbohydrate transmembrane transporter activity	GO:0016021,integral component of membrane
TMEM143	402.903	320.103	300.941	284.058	226.773	285.822	448.923	341.002	268.364	476.118	505.523	333.181	304.36	296.162	254.343	375.405	320.483	306.251	281.298	344.261	335.501	332.127	333.814	-0.0148307	0.151483	-0.0979031	0.922009	0.962097	Not DEG	GO:0008150,biological_process	GO:0003674,molecular_function	GO:0005739,mitochondrion|GO:0016021,integral component of membrane
RIT1	527.099	522.864	556.489	709.712	3483.85	514.142	507.271	1490.35	547.462	593.555	3747.6	613.855	2997.34	614.536	600.074	514.953	601.189	642.802	779.406	742.351	945.279	1185.41	766.426	0.40564	0.308531	1.31475	0.188595	0.383026	Not DEG	GO:0007165,signal transduction|GO:0007265,Ras protein signal transduction	GO:0003924,GTPase activity|GO:0005515,protein binding|GO:0005516,calmodulin binding|GO:0005525,GTP binding	GO:0005622,intracellular|GO:0005886,plasma membrane
TMEM141	752.998	1023.29	1475.28	1328.21	766.095	1026.59	651.355	815.705	824.909	1202.59	751.681	850.614	1263.7	1092.43	792.758	935.564	568.232	727.21	708.247	1591.11	986.703	928.155	957.429	-0.0885946	0.192382	-0.460513	0.645148	0.801773	Not DEG	GO:0003341,cilium movement|GO:0036158,outer dynein arm assembly		GO:0005930,axoneme|GO:0016021,integral component of membrane
FOXL1	62.5868	50.0431	49.5965	52.9895	41.1247	69.3415	163.136	174.181	47.8926	41.8766	62.4399	78.2832	60.1319	31.6355	91.3874	124.807	210.246	475.067	115.632	127.689	75.2768	137.732	106.504	0.873662	0.424289	2.05912	0.0394826	0.134421	Not DEG	GO:0006351,transcription, DNA-templated|GO:0006357,regulation of transcription from RNA polymerase II promoter|GO:0007275,multicellular organism development|GO:0007495,visceral mesoderm-endoderm interaction involved in midgut development|GO:0007507,heart development|GO:0009653,anatomical structure morphogenesis|GO:0009887,animal organ morphogenesis|GO:0030111,regulation of Wnt signaling pathway|G…	GO:0000981,RNA polymerase II transcription factor activity, sequence-specific DNA binding|GO:0003677,DNA binding|GO:0003700,DNA binding transcription factor activity|GO:0008301,DNA binding, bending|GO:0043565,sequence-specific DNA binding	GO:0005634,nucleus|GO:0005634,nucleus
PCDHA6	40.0947	56.9456	126.933	24.323	128.074	232.548	80.9728	157.008	62.7558	62.8148	49.2315	165.159	163.744	653.575	122.217	148.393	28.4116	196.953	436.956	229.09	97.247	219.373	158.31	1.17518	0.461532	2.54626	0.0108884	0.055023	Up	GO:0007155,cell adhesion|GO:0007156,homophilic cell adhesion via plasma membrane adhesion molecules|GO:0007267,cell-cell signaling|GO:0007399,nervous system development	GO:0005509,calcium ion binding	GO:0005576,extracellular region|GO:0005887,integral component of plasma membrane
API5	9965.98	10840.4	10480	8010.97	9902.83	9740.79	9544.07	9299.04	10012.9	10444.6	12381.1	9941.97	11039.3	12467.7	10651.6	11122.6	10154.3	7741.76	9419.58	11447	9824.14	10636.7	10230.4	0.114662	0.082614	1.38793	0.165159	0.350591	Not DEG	GO:0006915,apoptotic process|GO:0043066,negative regulation of apoptotic process|GO:0043066,negative regulation of apoptotic process|GO:0043066,negative regulation of apoptotic process|GO:2000270,negative regulation of fibroblast apoptotic process	GO:0003723,RNA binding|GO:0005515,protein binding|GO:0017134,fibroblast growth factor binding	GO:0005634,nucleus|GO:0005681,spliceosomal complex|GO:0005737,cytoplasm|GO:0016020,membrane|GO:0016607,nuclear speck
UBE2NL	0	0	0	0	0	0	0	0	0	0	0	0	0	0	0	0	0	0	2.2237	0	0	0.22237	0.111185	0.674654	3.02619	0.222939	0.823583	NA	Not DEG	GO:0006301,postreplication repair|GO:0070534,protein K63-linked ubiquitination	GO:0031625,ubiquitin protein ligase binding|GO:0061630,ubiquitin protein ligase activity	GO:0005634,nucleus|GO:0005737,cytoplasm|GO:0070062,extracellular exosome	path:hsa04120 Ubiquitin mediated proteolysis - Homo sapiens (human)
SOWAHA	116.372	91.458	142.905	145.938	92.8243	157.287	138.13	241.645	68.5359	125.63	181.316	105.969	247.003	126.542	117.813	151.341	94.3265	212.103	31.1318	289.179	132.073	155.672	143.872	0.237674	0.302344	0.786106	0.431806	0.642254	Not DEG
SECISBP2L	16013.4	19610	14282.1	13960.6	16064.5	16800.9	18897.6	16185.3	13519.7	17022.8	19194.3	18200.9	14193.9	16908.8	17875.6	17146.8	15738.9	13164.4	14266.1	14222.3	16235.7	16091.2	16163.5	-0.0128595	0.0899246	-0.143003	0.886288	0.944618	Not DEG	GO:0001514,selenocysteine incorporation	GO:0003723,RNA binding|GO:0003730,mRNA 3'-UTR binding|GO:0005515,protein binding|GO:0035368,selenocysteine insertion sequence binding|GO:0043021,ribonucleoprotein complex binding	GO:0030529,intracellular ribonucleoprotein complex
SOWAHC	1898.14	2642.79	2729.49	2256.83	2056.24	2081.94	2281.53	2277.84	1537.52	1858.96	1822.77	2179.52	1852.06	2019.29	2577.56	2359.55	1595.59	1713.06	1376.47	1107.89	2162.13	1860.38	2011.25	-0.216592	0.143174	-1.51279	0.130334	0.299565	Not DEG
SOWAHD	16.6246	3.45125	24.3779	0	4.69997	3.38251	20.2432	0	9.90881	14.5658	0	7.63739	8.32596	6.05786	0	11.7928	4.54585	21.6432	13.3422	10.0149	9.7254	8.33601	9.03071	-0.223088	0.760671	-0.293278	0.76931	0.881013	Not DEG
FANCI	575.994	345.987	758.237	194.584	459.422	334.023	510.843	445.265	813.348	358.682	726.465	616.719	893.653	894.543	508.686	432.403	765.976	819.193	880.584	846.255	479.639	738.448	609.043	0.622491	0.219605	2.8346	0.00458834	0.0299913	Not DEG	GO:0007095,mitotic G2 DNA damage checkpoint|GO:0031398,positive regulation of protein ubiquitination|GO:0036297,interstrand cross-link repair	GO:0003677,DNA binding|GO:0005515,protein binding|GO:0070182,DNA polymerase binding	GO:0005654,nucleoplasm|GO:0005654,nucleoplasm|GO:0005829,cytosol|GO:0016020,membrane	path:hsa03460 Fanconi anemia pathway - Homo sapiens (human)
HLA-DPA1	5619.12	1829.16	7902.65	7269.98	4106.6	2022.74	4081.98	2350.21	19175.2	3543.12	5784.1	10511.9	14628.7	13764.1	3904.33	2702.52	8459.83	8892.09	68955.7	17343.2	5790.08	15494.7	10642.4	1.42009	0.492527	2.88328	0.0039356	0.0266912	Up	GO:0006955,immune response|GO:0019886,antigen processing and presentation of exogenous peptide antigen via MHC class II|GO:0019886,antigen processing and presentation of exogenous peptide antigen via MHC class II|GO:0031295,T cell costimulation|GO:0032729,positive regulation of interferon-gamma production|GO:0042102,positive regulation of T cell proliferation|GO:0050852,T cell receptor signaling …	GO:0032395,MHC class II receptor activity|GO:0042605,peptide antigen binding	GO:0000139,Golgi membrane|GO:0005765,lysosomal membrane|GO:0005886,plasma membrane|GO:0005887,integral component of plasma membrane|GO:0009986,cell surface|GO:0010008,endosome membrane|GO:0012507,ER to Golgi transport vesicle membrane|GO:0030658,transport vesicle membrane|GO:0030666,endocytic vesicle membrane|GO:0030669,clathrin-coated endocytic vesicle membrane|GO:0032588,trans-Golgi network mem…	path:hsa04145 Phagosome - Homo sapiens (human)|path:hsa04514 Cell adhesion molecules (CAMs) - Homo sapiens (human)|path:hsa04612 Antigen processing and presentation - Homo sapiens (human)|path:hsa04640 Hematopoietic cell lineage - Homo sapiens (human)|path:hsa04658 Th1 and Th2 cell differentiation - Homo sapiens (human)|path:hsa04659 Th17 cell differentiation - Homo sapiens (human)|path:hsa04672 …
FAM32A	1742.65	2140.64	1930.9	2083.1	1870.59	1998.22	1700.43	1659.62	1908.27	1745.16	2215.42	2383.82	2291.49	1923.71	1526.06	1540.93	1405.81	1906.76	2049.14	1815.19	1877.96	1905.83	1891.89	0.021146	0.101003	0.20936	0.834167	0.917878	Not DEG	GO:0006915,apoptotic process|GO:0007049,cell cycle|GO:0008150,biological_process	GO:0003723,RNA binding|GO:0005515,protein binding	GO:0005634,nucleus|GO:0005730,nucleolus|GO:0005730,nucleolus
SUGP1	2151.42	1855.04	1541.69	1863.32	1791.86	1771.59	1794.5	1366.46	1920.66	1949.99	1934.44	1897.89	2376.6	1826.78	1323.47	1476.07	1535.36	1855.9	1926.83	2165.71	1800.65	1831.9	1816.28	0.02466	0.10742	0.229567	0.818429	0.909285	Not DEG	GO:0000398,mRNA splicing, via spliceosome	GO:0003723,RNA binding|GO:0005515,protein binding	GO:0005654,nucleoplasm|GO:0005681,spliceosomal complex
ABHD14A-ACY1	0	89.7324	0	0	21.1499	170.817	388.193	126.342	0	111.974	122.478	78.2832	113.788	0	0	0	293.208	8.65726	124.527	122.682	90.8209	86.3623	88.5916	-0.0725637	1.43561	-0.0505455	0.959688	0.980809	Not DEG				path:hsa00220 Arginine biosynthesis - Homo sapiens (human)|path:hsa01100 Metabolic pathways - Homo sapiens (human)|path:hsa01210 2-Oxocarboxylic acid metabolism - Homo sapiens (human)|path:hsa01230 Biosynthesis of amino acids - Homo sapiens (human)
KIAA1191	6423.95	7200.16	6685.44	6922.51	5554.19	5557.47	5572.83	6001.87	5389.57	6201.37	6474.54	6617.8	7189	6866.24	5792.64	5006.05	5974.39	4868.63	5970.63	6671.15	6150.94	6143.11	6147.02	-0.00185153	0.0846109	-0.0218829	0.982541	0.991474	Not DEG	GO:0008150,biological_process|GO:0055114,oxidation-reduction process	GO:0003674,molecular_function|GO:0005515,protein binding|GO:0016491,oxidoreductase activity	GO:0005575,cellular_component|GO:0005737,cytoplasm
LOC102724951	106.593	111.303	138.702	5.21208	88.1244	215.635	95.2621	0	35.5066	149.299	117.675	168.977	184.096	45.7705	35.2337	381.301	68.1878	0	0	206.556	94.5637	120.78	107.672	0.352719	0.818774	0.430789	0.666622	0.816248	Not DEG
FER1L6	1770.03	1323.55	438.803	628.924	642.72	1133.14	1518.24	599.819	189.093	1056.93	82.853	848.705	6.47574	60.5786	654.025	855.962	128.42	34.629	27.7962	22.5334	930.126	272.198	601.162	-1.7726	0.645548	-2.74588	0.0060348	0.0364404	Down			GO:0016021,integral component of membrane
VMP1	28777.2	30409.8	21468.5	23944.3	61563.7	47834.6	18399.9	49348.3	41043.9	9425.87	41683.5	29406.8	27809.6	26356.4	38652.5	35387.3	18692.6	33128.1	28752.4	30365	33221.6	31023.4	32122.5	-0.0987604	0.252251	-0.391516	0.695416	0.83554	Not DEG	GO:0006887,exocytosis|GO:0006914,autophagy|GO:0007029,endoplasmic reticulum organization|GO:0007030,Golgi organization|GO:0007566,embryo implantation|GO:0034329,cell junction assembly|GO:0098609,cell-cell adhesion	GO:0005515,protein binding	GO:0000407,pre-autophagosomal structure|GO:0000421,autophagosome membrane|GO:0005730,nucleolus|GO:0005783,endoplasmic reticulum|GO:0005886,plasma membrane|GO:0016020,membrane|GO:0016021,integral component of membrane|GO:0033116,endoplasmic reticulum-Golgi intermediate compartment membrane	path:hsa04140 Autophagy - animal - Homo sapiens (human)
FER1L5	237.634	132.873	178.211	167.655	226.773	285.822	377.476	245.325	114.777	207.562	79.2507	212.892	52.7311	47.1167	179.472	273.2	132.966	125.53	96.7308	107.66	217.411	130.755	174.083	-0.733029	0.299355	-2.4487	0.0143374	0.0667364	Not DEG	GO:0007520,myoblast fusion		GO:0005886,plasma membrane|GO:0016021,integral component of membrane
DENND4C	15348.4	20482.3	15154.7	12280.5	16018.7	16450.8	17681.8	17344.5	14532.1	16544	20088.8	18846.2	17071	20013.8	16890.2	17214.6	15944.6	14173	14902.1	19607.8	16183.8	17475.2	16829.5	0.110799	0.0915987	1.20961	0.226427	0.431347	Not DEG	GO:0015031,protein transport|GO:0032869,cellular response to insulin stimulus|GO:0065009,regulation of molecular function|GO:0072659,protein localization to plasma membrane	GO:0017112,Rab guanyl-nucleotide exchange factor activity|GO:0017112,Rab guanyl-nucleotide exchange factor activity	GO:0005829,cytosol|GO:0005829,cytosol|GO:0005886,plasma membrane|GO:0030659,cytoplasmic vesicle membrane|GO:0032593,insulin-responsive compartment
RNF183	10.7571	8.62811	0	18.2423	28.1998	0	29.7694	0	6.60587	3.64144	8.40537	7.63739	0	16.8274	0	3.93094	35.2304	53.0257	12.2303	50.0743	10.5844	18.7362	14.6603	0.826707	0.937773	0.881564	0.378013	0.594877	Not DEG	GO:0000209,protein polyubiquitination	GO:0005515,protein binding|GO:0046872,metal ion binding|GO:0061630,ubiquitin protein ligase activity	GO:0005783,endoplasmic reticulum|GO:0016021,integral component of membrane
ZMAT1	3567.45	11975.8	6075.99	6893.85	10072	10541.6	15286	9673.16	7704.1	8515.51	7431.55	4020.13	7675.61	8273.69	8514.44	10030.8	11887.4	5933.47	6243.03	8637.81	9030.55	7864.79	8447.67	-0.199381	0.217812	-0.915382	0.359991	0.577425	Not DEG	GO:0072332,intrinsic apoptotic signaling pathway by p53 class mediator	GO:0002039,p53 binding|GO:0003677,DNA binding|GO:0003723,RNA binding|GO:0008270,zinc ion binding	GO:0005634,nucleus
ZMAT3	5312.06	4020.7	5316.07	2265.52	5983.06	4787.1	5008.4	5501.41	6584.41	4531.77	24349.2	11552.5	18614.1	26665.3	6810.01	6834.92	21420.1	17654.3	15673.7	5277.83	4931.05	15485.2	10208.1	1.65096	0.268744	6.14323	8.08625e-10	1.03017e-07	Up	GO:0006974,cellular response to DNA damage stimulus|GO:0015031,protein transport|GO:0040008,regulation of growth|GO:0043065,positive regulation of apoptotic process|GO:0072332,intrinsic apoptotic signaling pathway by p53 class mediator	GO:0002039,p53 binding|GO:0003723,RNA binding|GO:0003723,RNA binding|GO:0005515,protein binding|GO:0008270,zinc ion binding	GO:0005654,nucleoplasm|GO:0005730,nucleolus|GO:0005886,plasma membrane	path:hsa04115 p53 signaling pathway - Homo sapiens (human)
ZMAT2	5021.62	4946.5	3909.71	5534.36	5271.01	4798.09	4240.35	3324.15	4647.23	4283.24	5817.72	5320.4	6102.93	5717.94	3959.39	4161.88	4762.92	4880.53	4838.76	5754.79	4597.63	5131.73	4864.68	0.158509	0.10379	1.52721	0.126708	0.29487	Not DEG	GO:0000398,mRNA splicing, via spliceosome	GO:0003677,DNA binding|GO:0003723,RNA binding|GO:0005515,protein binding|GO:0008270,zinc ion binding	GO:0046540,U4/U6 x U5 tri-snRNP complex	path:hsa03040 Spliceosome - Homo sapiens (human)
ZMAT5	547.635	531.492	627.101	538.582	410.072	586.02	423.916	338.548	516.084	503.429	290.586	421.011	454.227	396.453	466.846	420.611	392.08	422.041	274.627	354.276	502.288	389.276	445.782	-0.368448	0.125761	-2.92975	0.00339235	0.0239931	Not DEG	GO:0000398,mRNA splicing, via spliceosome|GO:0008380,RNA splicing	GO:0008270,zinc ion binding	GO:0005654,nucleoplasm|GO:0005654,nucleoplasm|GO:0005689,U12-type spliceosomal complex
ZMAT4	2474.14	1702.33	1587.93	2329.8	1164.42	2370.29	691.841	688.136	1549.08	2864.9	124.88	1234.39	0	177.024	1440.18	2609.16	97.7359	44.3685	452.522	0	1742.29	618.026	1180.16	-1.49522	0.890664	-1.67877	0.093197	0.241212	Not DEG	GO:0072332,intrinsic apoptotic signaling pathway by p53 class mediator	GO:0002039,p53 binding|GO:0003677,DNA binding|GO:0003723,RNA binding|GO:0005515,protein binding|GO:0008270,zinc ion binding	GO:0005634,nucleus
C19orf24	404.859	358.067	471.587	489.936	340.748	385.606	389.384	387.613	426.905	548.037	237.752	399.054	778.014	390.395	395.278	326.268	337.53	372.262	324.66	539.55	420.274	410.076	415.175	-0.0353851	0.17439	-0.202908	0.839207	0.920715	Not DEG			GO:0005576,extracellular region|GO:0005737,cytoplasm|GO:0016021,integral component of membrane
C19orf25	613.155	667.816	597.679	783.55	589.846	515.833	591.816	766.64	723.343	652.728	396.253	500.249	504.183	441.55	551.627	471.713	482.997	650.377	470.312	538.299	650.241	500.756	575.498	-0.377344	0.0983379	-3.83721	0.000124438	0.00197822	Not DEG		GO:0005515,protein binding
MYBL1	675.742	170.837	712.844	290.139	395.972	334.869	413.199	337.322	1730.74	349.578	524.736	457.289	307.135	541.842	1093.35	414.714	625.055	438.274	1495.44	644.706	541.124	654.253	597.689	0.273394	0.359779	0.759894	0.447318	0.657153	Not DEG	GO:0000278,mitotic cell cycle|GO:0006366,transcription from RNA polymerase II promoter|GO:0007141,male meiosis I|GO:0007283,spermatogenesis|GO:0010529,negative regulation of transposition|GO:0030154,cell differentiation|GO:0045893,positive regulation of transcription, DNA-templated|GO:0045944,positive regulation of transcription from RNA polymerase II promoter|GO:1990511,piRNA biosynthetic process	GO:0000978,RNA polymerase II proximal promoter sequence-specific DNA binding|GO:0001077,transcriptional activator activity, RNA polymerase II proximal promoter sequence-specific DNA binding|GO:0001135,transcription factor activity, RNA polymerase II transcription factor recruiting	GO:0005634,nucleus|GO:0005634,nucleus|GO:0005634,nucleus	path:hsa05166 HTLV-I infection - Homo sapiens (human)
NR1D1	1413.09	138.05	218.561	129.433	226.773	142.911	238.155	320.149	326.991	152.94	7383.52	650.133	896.428	2489.11	198.19	108.101	567.095	2104.8	1319.76	1896.56	330.706	1761.37	1046.04	2.41313	0.563731	4.28064	1.86361e-05	0.000440304	Up	GO:0000122,negative regulation of transcription from RNA polymerase II promoter|GO:0000122,negative regulation of transcription from RNA polymerase II promoter|GO:0005978,glycogen biosynthetic process|GO:0006367,transcription initiation from RNA polymerase II promoter|GO:0007623,circadian rhythm|GO:0010498,proteasomal protein catabolic process|GO:0010871,negative regulation of receptor biosynthet…	GO:0000977,RNA polymerase II regulatory region sequence-specific DNA binding|GO:0000978,RNA polymerase II proximal promoter sequence-specific DNA binding|GO:0001046,core promoter sequence-specific DNA binding|GO:0001078,transcriptional repressor activity, RNA polymerase II proximal promoter sequence-specific DNA binding|GO:0001222,transcription corepressor binding|GO:0001222,transcription corepre…	GO:0000790,nuclear chromatin|GO:0005634,nucleus|GO:0005654,nucleoplasm|GO:0005737,cytoplasm|GO:0016604,nuclear body|GO:0030425,dendrite|GO:0043197,dendritic spine	path:hsa04710 Circadian rhythm - Homo sapiens (human)
NR1D2	17006	9897.31	4214.86	4152.29	4025.52	7459.28	6201.56	18907.2	12190.3	7642.47	20613.6	8343.85	8161.29	19198.7	4914	8377.82	8634.85	15845	14168.3	10962.5	9169.68	11922	10545.8	0.378699	0.311063	1.21743	0.223439	0.427488	Not DEG	GO:0000122,negative regulation of transcription from RNA polymerase II promoter|GO:0006355,regulation of transcription, DNA-templated|GO:0006367,transcription initiation from RNA polymerase II promoter|GO:0019216,regulation of lipid metabolic process|GO:0030522,intracellular receptor signaling pathway|GO:0042752,regulation of circadian rhythm|GO:0043401,steroid hormone mediated signaling pathway|…	GO:0000980,RNA polymerase II distal enhancer sequence-specific DNA binding|GO:0001046,core promoter sequence-specific DNA binding|GO:0001206,transcriptional repressor activity, RNA polymerase II distal enhancer sequence-specific binding|GO:0003707,steroid hormone receptor activity|GO:0004879,nuclear receptor activity|GO:0005515,protein binding|GO:0008270,zinc ion binding	GO:0005634,nucleus|GO:0005634,nucleus|GO:0005654,nucleoplasm|GO:0005654,nucleoplasm
MYBL2	357.918	3.45125	720.41	12.1615	137.474	45.6639	41.6772	9.81299	1131.26	20.0279	188.521	8.59206	158.193	114.426	330.316	26.5339	80.6889	74.6689	525.904	153.978	247.985	166.182	207.084	-0.578088	0.780163	-0.740984	0.458703	0.666813	Not DEG	GO:0006357,regulation of transcription from RNA polymerase II promoter|GO:0006366,transcription from RNA polymerase II promoter|GO:0030154,cell differentiation|GO:0043525,positive regulation of neuron apoptotic process|GO:0045944,positive regulation of transcription from RNA polymerase II promoter|GO:0051726,regulation of cell cycle|GO:0090307,mitotic spindle assembly|GO:1990830,cellular response…	GO:0000978,RNA polymerase II proximal promoter sequence-specific DNA binding|GO:0001077,transcriptional activator activity, RNA polymerase II proximal promoter sequence-specific DNA binding|GO:0001135,transcription factor activity, RNA polymerase II transcription factor recruiting|GO:0003700,DNA binding transcription factor activity|GO:0005515,protein binding	GO:0005634,nucleus|GO:0005654,nucleoplasm|GO:0005654,nucleoplasm|GO:0031523,Myb complex	path:hsa05166 HTLV-I infection - Homo sapiens (human)
ITGB1BP1	1397.45	1886.97	2056.15	2432.3	1521.61	2092.08	1607.55	1909.85	1590.36	1650.48	1394.09	1886.44	1839.11	1795.82	1565.7	2025.42	1566.05	1730.37	1258.61	1852.75	1814.48	1691.43	1752.96	-0.101312	0.112268	-0.902416	0.366836	0.584348	Not DEG	GO:0002043,blood vessel endothelial cell proliferation involved in sprouting angiogenesis|GO:0006351,transcription, DNA-templated|GO:0006469,negative regulation of protein kinase activity|GO:0006933,negative regulation of cell adhesion involved in substrate-bound cell migration|GO:0007160,cell-matrix adhesion|GO:0007219,Notch signaling pathway|GO:0007229,integrin-mediated signaling pathway|GO:000…	GO:0005092,GDP-dissociation inhibitor activity|GO:0005178,integrin binding|GO:0005178,integrin binding|GO:0005515,protein binding|GO:0008565,protein transporter activity|GO:0019901,protein kinase binding|GO:0032403,protein complex binding	GO:0001726,ruffle|GO:0005634,nucleus|GO:0005654,nucleoplasm|GO:0005737,cytoplasm|GO:0005829,cytosol|GO:0005856,cytoskeleton|GO:0005886,plasma membrane|GO:0005925,focal adhesion|GO:0016020,membrane|GO:0030027,lamellipodium|GO:0048471,perinuclear region of cytoplasm|GO:0070062,extracellular exosome|GO:0071944,cell periphery
ITGB1BP2	83.1231	53.4943	100.034	95.5548	110.449	149.676	120.268	112.849	113.126	62.8148	222.142	68.7365	99.9115	113.753	111.206	108.101	169.333	142.845	100.066	110.163	100.139	124.626	112.382	0.314468	0.217274	1.44733	0.147804	0.325708	Not DEG	GO:0007165,signal transduction|GO:0007517,muscle organ development	GO:0005178,integrin binding|GO:0005509,calcium ion binding|GO:0005515,protein binding|GO:0008270,zinc ion binding|GO:0017124,SH3 domain binding	GO:0030018,Z disc
ZNF7	2809.56	2987.92	2729.49	2622.55	2906.93	2525.04	2541.12	2580.82	2437.57	2628.21	2662.1	2777.15	2719.81	2784.59	2742.72	2282.89	2935.49	2949.96	2545.02	3104.61	2676.92	2750.43	2713.68	0.0389257	0.0589391	0.660439	0.508972	0.705529	Not DEG	GO:0006351,transcription, DNA-templated|GO:0006355,regulation of transcription, DNA-templated|GO:0007275,multicellular organism development	GO:0003677,DNA binding|GO:0003700,DNA binding transcription factor activity|GO:0046872,metal ion binding	GO:0005634,nucleus
FAM205C	10.7571	10.3537	20.1748	0	8.22494	21.1407	10.717	2.45325	20.6434	7.28288	0	1.90935	7.40085	2.69238	7.70737	31.4475	5.68232	0	3.33555	0	11.1748	6.01753	8.59616	-0.890592	0.800915	-1.11197	0.266152	0.478722	Not DEG			GO:0016021,integral component of membrane
ZNF2	997.478	1015.53	907.027	641.955	696.77	934.419	1051.46	772.773	875.278	850.276	713.256	973.767	685.504	786.848	705.775	885.444	940.992	867.89	624.859	728.581	874.296	791.292	832.794	-0.143816	0.110558	-1.30081	0.193323	0.388993	Not DEG	GO:0006351,transcription, DNA-templated|GO:0006355,regulation of transcription, DNA-templated|GO:0006355,regulation of transcription, DNA-templated	GO:0003677,DNA binding|GO:0003700,DNA binding transcription factor activity|GO:0008270,zinc ion binding	GO:0005634,nucleus
ZNF3	3542.02	4033.64	3688.63	4620.51	3387.5	4296.64	4001.01	4011.06	3082.47	4098.44	2806.19	3471.19	3176.82	2810.17	3362.62	3605.66	3055.95	3318.98	2323.76	2736.56	3876.19	3066.79	3471.49	-0.337846	0.0905603	-3.73062	0.000191008	0.00278933	Not DEG	GO:0006351,transcription, DNA-templated|GO:0006355,regulation of transcription, DNA-templated|GO:0007275,multicellular organism development|GO:0030154,cell differentiation|GO:0045321,leukocyte activation	GO:0003677,DNA binding|GO:0003700,DNA binding transcription factor activity|GO:0005515,protein binding|GO:0008270,zinc ion binding|GO:0042802,identical protein binding	GO:0005634,nucleus
CTCFL	3.91168	13.805	23.5373	0	4.69997	0	0	9.81299	72.6646	7.28288	4.80307	0	3.70043	0	13.2126	11.7928	0	0	21.1251	0	13.5714	5.46341	9.51742	-1.31799	1.22183	-1.0787	0.280722	0.494897	Not DEG	GO:0006349,regulation of gene expression by genetic imprinting|GO:0006366,transcription from RNA polymerase II promoter|GO:0007049,cell cycle|GO:0010628,positive regulation of gene expression|GO:0016571,histone methylation|GO:0043046,DNA methylation involved in gamete generation|GO:0045893,positive regulation of transcription, DNA-templated|GO:0045944,positive regulation of transcription from RNA…	GO:0000978,RNA polymerase II proximal promoter sequence-specific DNA binding|GO:0001077,transcriptional activator activity, RNA polymerase II proximal promoter sequence-specific DNA binding|GO:0003677,DNA binding|GO:0005515,protein binding|GO:0042393,histone binding|GO:0043565,sequence-specific DNA binding|GO:0044212,transcription regulatory region DNA binding|GO:0046872,metal ion binding	GO:0005634,nucleus|GO:0005737,cytoplasm
PHLDA1	8711.31	7314.92	6376.09	14626.8	12879.1	14105.9	10511	17198.5	9944.32	10732.2	9674.59	10150.1	4222.19	8015.22	17664.2	15240.3	24565.8	21123.7	18867	11244.2	11240	14076.7	12658.4	0.324664	0.259203	1.25255	0.21037	0.411155	Not DEG	GO:0000086,G2/M transition of mitotic cell cycle|GO:0006915,apoptotic process|GO:0045210,FasL biosynthetic process	GO:0005515,protein binding	GO:0005634,nucleus|GO:0005730,nucleolus|GO:0005829,cytosol|GO:0031410,cytoplasmic vesicle
ZNF8	1107.98	1152.72	1129.79	1429.85	1441.71	1207.56	1065.74	1236.44	1094.1	1561.27	1486.55	1313.63	1769.73	1374.46	1484.22	1053.49	1210.33	1354.86	1204.13	1735.07	1242.72	1398.65	1320.68	0.170441	0.106303	1.60335	0.108857	0.266914	Not DEG	GO:0000122,negative regulation of transcription from RNA polymerase II promoter|GO:0006351,transcription, DNA-templated|GO:0030509,BMP signaling pathway	GO:0003677,DNA binding|GO:0008270,zinc ion binding	GO:0005634,nucleus
MPRIP	18168.8	20500.4	18723.1	23933.9	25483.2	20368.6	21723.3	22216.6	18778	18779.8	20446.7	22121.7	25365.5	26738	22921.7	21926.8	36638.4	33241.7	25351.3	40525.1	20867.6	27527.7	24197.6	0.39962	0.128139	3.11865	0.00181682	0.0153645	Not DEG		GO:0003779,actin binding|GO:0005515,protein binding|GO:0045296,cadherin binding	GO:0005829,cytosol|GO:0005925,focal adhesion|GO:0015629,actin cytoskeleton
C11orf16	36.183	17.2562	26.0592	15.6362	17.6249	12.6844	48.8218	9.81299	9.90881	27.3108	7.20461	11.4561	22.2026	12.1157	26.4253	24.5684	44.3221	47.6149	21.1251	32.5483	22.1298	24.9583	23.5441	0.172748	0.384439	0.449351	0.653178	0.806892	Not DEG
ZAP70	248.392	31.924	376.597	102.504	175.074	103.167	147.656	69.9176	722.517	131.092	52.8338	126.972	79.5592	55.1938	133.227	156.255	146.604	173.145	758.281	150.223	210.884	183.229	197.057	-0.203857	0.504022	-0.404461	0.685874	0.829111	Not DEG	GO:0002250,adaptive immune response|GO:0006468,protein phosphorylation|GO:0006468,protein phosphorylation|GO:0006955,immune response|GO:0007169,transmembrane receptor protein tyrosine kinase signaling pathway|GO:0018108,peptidyl-tyrosine phosphorylation|GO:0018108,peptidyl-tyrosine phosphorylation|GO:0030217,T cell differentiation|GO:0035556,intracellular signal transduction|GO:0038083,peptidyl-t…	GO:0004713,protein tyrosine kinase activity|GO:0004713,protein tyrosine kinase activity|GO:0004713,protein tyrosine kinase activity|GO:0004715,non-membrane spanning protein tyrosine kinase activity|GO:0005102,receptor binding|GO:0005515,protein binding|GO:0005524,ATP binding	GO:0001772,immunological synapse|GO:0005737,cytoplasm|GO:0005829,cytosol|GO:0005886,plasma membrane|GO:0005886,plasma membrane|GO:0005911,cell-cell junction|GO:0031234,extrinsic component of cytoplasmic side of plasma membrane|GO:0042101,T cell receptor complex|GO:0045121,membrane raft	path:hsa04014 Ras signaling pathway - Homo sapiens (human)|path:hsa04064 NF-kappa B signaling pathway - Homo sapiens (human)|path:hsa04650 Natural killer cell mediated cytotoxicity - Homo sapiens (human)|path:hsa04658 Th1 and Th2 cell differentiation - Homo sapiens (human)|path:hsa04659 Th17 cell differentiation - Homo sapiens (human)|path:hsa04660 T cell receptor signaling pathway - Homo sapiens…
TXNRD3NB	34.2272	26.7472	40.3497	63.4137	30.5498	43.9726	85.7359	22.0792	12.386	44.6076	15.61	39.1416	11.1013	16.8274	28.6274	50.1195	37.5033	8.65726	23.3488	0	40.4069	23.0937	31.7503	-0.803954	0.457497	-1.75729	0.0788687	0.21566	Not DEG
UFSP2	3280.92	3439.17	3846.67	3404.36	4002.02	4157.11	3593.76	3650.43	2935.49	4722.95	3716.38	3219.16	2976.07	3567.4	4786.28	4334.85	2837.75	2399.14	2846.33	2761.6	3703.29	3344.5	3523.89	-0.146939	0.124968	-1.17581	0.23967	0.448103	Not DEG	GO:0006508,proteolysis|GO:0033146,regulation of intracellular estrogen receptor signaling pathway	GO:0005515,protein binding|GO:0016790,thiolester hydrolase activity|GO:0071567,UFM1 hydrolase activity	GO:0005634,nucleus|GO:0005737,cytoplasm|GO:0005783,endoplasmic reticulum
SYNDIG1	290.442	314.063	515.299	517.733	246.748	476.088	490.6	629.258	405.436	487.953	64.8415	217.666	80.4843	105.003	224.615	459.92	121.602	220.76	171.225	123.934	437.362	179.005	308.184	-1.28852	0.292766	-4.4012	1.07654e-05	0.000286549	Down	GO:0006886,intracellular protein transport|GO:0009607,response to biotic stimulus|GO:0051965,positive regulation of synapse assembly|GO:0097091,synaptic vesicle clustering	GO:0005515,protein binding|GO:0035254,glutamate receptor binding|GO:0042803,protein homodimerization activity	GO:0005887,integral component of plasma membrane|GO:0014069,postsynaptic density|GO:0030054,cell junction|GO:0031901,early endosome membrane|GO:0043197,dendritic spine|GO:0043198,dendritic shaft|GO:0043231,intracellular membrane-bounded organelle|GO:0044297,cell body|GO:0045211,postsynaptic membrane|GO:0060076,excitatory synapse|GO:0098793,presynapse
CTSW	276.751	45.729	226.967	115.534	307.848	136.992	123.841	94.4501	407.087	154.761	162.104	120.289	199.823	102.984	282.971	203.426	101.145	119.037	479.207	179.016	188.996	195	191.998	0.0443155	0.354655	0.124954	0.90056	0.951263	Not DEG	GO:0002576,platelet degranulation|GO:0006955,immune response|GO:0051603,proteolysis involved in cellular protein catabolic process	GO:0004197,cysteine-type endopeptidase activity|GO:0008234,cysteine-type peptidase activity	GO:0005576,extracellular region|GO:0005615,extracellular space|GO:0005764,lysosome|GO:0016020,membrane|GO:0031089,platelet dense granule lumen	path:hsa04142 Lysosome - Homo sapiens (human)|path:hsa04210 Apoptosis - Homo sapiens (human)
EPM2AIP1	15751.3	17902.5	12549.6	8314.14	15703.8	14666.6	15228.8	15357.3	12911.2	15206.7	15360.2	14778.3	12194.8	14405.6	17653.2	15923.3	14308.1	10316.2	11675.5	11980.3	14359.2	13859.5	14109.4	-0.0510622	0.125305	-0.407502	0.68364	0.827762	Not DEG	GO:0006357,regulation of transcription from RNA polymerase II promoter|GO:0032868,response to insulin|GO:0045725,positive regulation of glycogen biosynthetic process|GO:2000467,positive regulation of glycogen (starch) synthase activity	GO:0000981,RNA polymerase II transcription factor activity, sequence-specific DNA binding|GO:0003677,DNA binding|GO:0005515,protein binding|GO:0042802,identical protein binding	GO:0005654,nucleoplasm|GO:0005737,cytoplasm|GO:0005783,endoplasmic reticulum
BCAP31	4176.69	4819.66	5574.98	5288.53	4533.12	4720.29	4014.11	4694.29	4068.39	5642.41	3374.16	3971.44	4857.73	4444.45	4165.28	4720.08	4953.84	5220.33	4220.58	5102.57	4753.25	4503.05	4628.15	-0.0781182	0.0919224	-0.849828	0.395421	0.608783	Not DEG	GO:0002474,antigen processing and presentation of peptide antigen via MHC class I|GO:0006886,intracellular protein transport|GO:0006888,ER to Golgi vesicle-mediated transport|GO:0007204,positive regulation of cytosolic calcium ion concentration|GO:0007283,spermatogenesis|GO:0032471,negative regulation of endoplasmic reticulum calcium ion concentration|GO:0035584,calcium-mediated signaling using i…	GO:0005515,protein binding|GO:0032403,protein complex binding|GO:0042288,MHC class I protein binding	GO:0005739,mitochondrion|GO:0005783,endoplasmic reticulum|GO:0005784,Sec61 translocon complex|GO:0005789,endoplasmic reticulum membrane|GO:0005811,lipid droplet|GO:0005829,cytosol|GO:0005887,integral component of plasma membrane|GO:0016020,membrane|GO:0030136,clathrin-coated vesicle|GO:0032580,Golgi cisterna membrane|GO:0033116,endoplasmic reticulum-Golgi intermediate compartment membrane|GO:0071…	path:hsa04141 Protein processing in endoplasmic reticulum - Homo sapiens (human)
CDC5L	5113.54	5924.93	4525.05	6173.71	6982.98	6150.25	5744.3	5409.41	6721.48	5422.1	6916.42	6842.15	6576.58	6759.89	6554.57	5606.5	5727.78	5296.08	7065.8	5913.77	5816.77	6325.95	6071.36	0.121131	0.0839608	1.44271	0.149102	0.327818	Not DEG	GO:0000278,mitotic cell cycle|GO:0000398,mRNA splicing, via spliceosome|GO:0000398,mRNA splicing, via spliceosome|GO:0006281,DNA repair|GO:0006357,regulation of transcription from RNA polymerase II promoter|GO:0006366,transcription from RNA polymerase II promoter|GO:0030154,cell differentiation|GO:0044344,cellular response to fibroblast growth factor stimulus|GO:0045944,positive regulation of tra…	GO:0000977,RNA polymerase II regulatory region sequence-specific DNA binding|GO:0000981,RNA polymerase II transcription factor activity, sequence-specific DNA binding|GO:0001135,transcription factor activity, RNA polymerase II transcription factor recruiting|GO:0001222,transcription corepressor binding|GO:0001228,transcriptional activator activity, RNA polymerase II transcription regulatory regio…	GO:0000974,Prp19 complex|GO:0005634,nucleus|GO:0005654,nucleoplasm|GO:0005654,nucleoplasm|GO:0005662,DNA replication factor A complex|GO:0005737,cytoplasm|GO:0016020,membrane|GO:0016607,nuclear speck|GO:0048471,perinuclear region of cytoplasm|GO:0071013,catalytic step 2 spliceosome	path:hsa03040 Spliceosome - Homo sapiens (human)
C17orf113	159.401	148.404	108.44	158.1	71.6745	165.743	238.155	177.861	95.7852	163.865	70.8453	162.295	83.2596	74.7136	80.3769	83.5325	112.51	136.352	65.5991	48.8224	148.743	91.8306	120.287	-0.693604	0.235271	-2.94811	0.00319721	0.022969	Not DEG			GO:0016021,integral component of membrane
RAC2	1738.74	93.1836	2193.17	481.249	826.019	449.874	303.648	161.914	4162.53	271.287	1228.39	901.212	880.701	545.88	936.996	623.054	837.574	874.383	3363.34	1592.36	1068.16	1178.39	1123.28	0.141463	0.52406	0.269937	0.787209	0.89171	Not DEG	GO:0006935,chemotaxis|GO:0007015,actin filament organization|GO:0007165,signal transduction|GO:0007186,G-protein coupled receptor signaling pathway|GO:0007264,small GTPase mediated signal transduction|GO:0008284,positive regulation of cell proliferation|GO:0010310,regulation of hydrogen peroxide metabolic process|GO:0010592,positive regulation of lamellipodium assembly|GO:0010810,regulation of ce…	GO:0003924,GTPase activity|GO:0005515,protein binding|GO:0005525,GTP binding|GO:0019887,protein kinase regulator activity	GO:0005635,nuclear envelope|GO:0005829,cytosol|GO:0005829,cytosol|GO:0005884,actin filament|GO:0005886,plasma membrane|GO:0005925,focal adhesion|GO:0030027,lamellipodium|GO:0030670,phagocytic vesicle membrane|GO:0070062,extracellular exosome	path:hsa04010 MAPK signaling pathway - Homo sapiens (human)|path:hsa04014 Ras signaling pathway - Homo sapiens (human)|path:hsa04015 Rap1 signaling pathway - Homo sapiens (human)|path:hsa04024 cAMP signaling pathway - Homo sapiens (human)|path:hsa04062 Chemokine signaling pathway - Homo sapiens (human)|path:hsa04071 Sphingolipid signaling pathway - Homo sapiens (human)|path:hsa04310 Wnt signaling…
RAC3	121.262	64.7109	79.8587	121.615	56.3996	55.8114	40.4864	55.1981	33.8551	91.036	21.6138	46.779	49.9557	41.7319	14.3137	52.085	55.6867	31.3826	57.8161	40.0594	72.0233	41.1424	56.5829	-0.80753	0.286241	-2.82115	0.00478511	0.0309159	Not DEG	GO:0007264,small GTPase mediated signal transduction|GO:0014041,regulation of neuron maturation|GO:0021894,cerebral cortex GABAergic interneuron development|GO:0030031,cell projection assembly|GO:0030036,actin cytoskeleton organization|GO:0031175,neuron projection development|GO:0033630,positive regulation of cell adhesion mediated by integrin|GO:0035556,intracellular signal transduction|GO:00488…	GO:0003924,GTPase activity|GO:0005515,protein binding|GO:0005525,GTP binding|GO:0048306,calcium-dependent protein binding	GO:0005829,cytosol|GO:0005886,plasma membrane|GO:0012505,endomembrane system|GO:0030027,lamellipodium|GO:0030426,growth cone|GO:0031941,filamentous actin|GO:0043005,neuron projection|GO:0043025,neuronal cell body|GO:0048471,perinuclear region of cytoplasm|GO:0070062,extracellular exosome|GO:0071944,cell periphery	path:hsa04010 MAPK signaling pathway - Homo sapiens (human)|path:hsa04014 Ras signaling pathway - Homo sapiens (human)|path:hsa04015 Rap1 signaling pathway - Homo sapiens (human)|path:hsa04024 cAMP signaling pathway - Homo sapiens (human)|path:hsa04071 Sphingolipid signaling pathway - Homo sapiens (human)|path:hsa04310 Wnt signaling pathway - Homo sapiens (human)|path:hsa04360 Axon guidance - Hom…
[truncated: 18,659 more rows]

## Sheet: README
Title	Description
gene_id	Gene ID
sample_name	Normalized expression volume
[truncated: 13 more rows]
