# Supplementary material for: Preliminary Study on the Sequencing of Whole Genomic Methylation and Transcriptome-Related Genes in Thyroid Carcinoma
Source: Cancers (Basel). 2022 Feb 24;14(5):1163. doi: 10.3390/cancers14051163 (PMC8909391; doi:10.3390/cancers14051163)
Supplement: Supplementary file 1 [file cancers-14-01163-s001.zip › Supplementary Table S3.xlsx]

## Sheet: Sheet 1
hypermethylated and down-regulated genes			hypomethylated and up-regulated genes
TPO			TNC
MATN2			ALK
RGS8			SLC1A5
CDH16			ADRA1B
MAB21L3			NRCAM
TFCP2L1			CYSLTR2
TFF3			GABBR2
			RASD2
			RUNX1
			KRT19
			RUNX2
			RIN1
			SHC3
			TACSTD2
			MYBPH
			ACTBL2
			CSF2
			COL26A1
			STAC
			RFX8
			VDR
			ABTB2
			PRR15
			NPC2
			SLC25A21
			MET
			SPOCD1
			TP63
			FAM129A
			KIAA1549L
			SYT1
			GALNT7
			BHLHE40
			GNLY
			CDC42EP3
			IL1RN
			CDH13
			NYAP2
			TCIM
			E2F1
			ITGA2
			TIAM1
			C8orf44-SGK3
			HTR7
			GRM5
			MCF2L2
			TNIK
			GAP43
			GALNTL6
			DUSP6
			RAB27A
			NRP2
			DPP4
			DRAXIN
			LPAR5
			CHST2
			LRP4
			PHLDA2
			SFTPB
			NELL2
			GJB3
			SHC4
			ATP10A
			LIPH
			FAM178B
