# Supplementary material for: Preliminary Study on the Sequencing of Whole Genomic Methylation and Transcriptome-Related Genes in Thyroid Carcinoma
Source: Cancers (Basel). 2022 Feb 24;14(5):1163. doi: 10.3390/cancers14051163 (PMC8909391; doi:10.3390/cancers14051163)
Supplement: Supplementary file 1 [file cancers-14-01163-s001.zip › Supplementary Table S4.xlsx]

## Sheet: Case.VS.Control
Target	P-value(Ttest)	FDR P-value(Ttest)	t-value(Ttest)	P-value(Utest)	FDR P-value(Utest)	Z-value(Utest)	P-value(Logistic)	FDR P-value(Logistic)	Estimate(Logistic)	OR(L95-U95)(Logistic)	Sensitivity(Logistic)	Specificity(Logistic)	Accuracy(Logistic)	AUC(Logistic)	GroupDiff	Case_Count	Case_Mean	Case_Median	Case_StdDev	Case_Min	Case_Max	Case_Quantile_25%	Case_Quantile_75%	Case_Shapiro-Wilk_Wvalue	Case_Shapiro-Wilk_Pvalue	Control_Count	Control_Mean	Control_Median	Control_StdDev	Control_Min	Control_Max	Control_Quantile_25%	Control_Quantile_75%	Control_Shapiro-Wilk_Wvalue	Control_Shapiro-Wilk_Pvalue
ABTB2_1	0.311915	0.535869	-1.01808	0.274135	0.48079	-0.600355	0.313743	0.533831	-2.43365	0.0877(8e-04-9.9868)	0.833333	0.341463	0.571429	0.573171	-0.000223028	36	0.008468	0.00853956	0.00088769	0.00629708	0.0101943	0.0079674	0.00903606	0.985232	0.902196	41	0.00869103	0.00854696	0.00103449	0.00577117	0.0104092	0.00824305	0.00964374	0.958405	0.138287
ABTB2_2	0.124258	0.315963	-1.55512	0.130036	0.285078	-1.12622	0.12451	0.318395	-3.92889	0.0197(1e-04-2.957)	0.527778	0.682927	0.61039	0.600949	-0.000329793	36	0.00797729	0.00783112	0.000947617	0.00599549	0.00961441	0.00732436	0.00857937	0.971394	0.464844	41	0.00830708	0.0082738	0.000906205	0.00684164	0.0102093	0.00763103	0.00885911	0.968562	0.309225
ABTB2_3	7.75938e-09	2.21142e-07	-6.52727	1.06494e-08	3.03508e-07	-5.60111	7.14081e-06	0.000324834	-8.10851	3e-04(0-0.0104)	0.694444	0.95122	0.831169	0.856369	-0.00255894	36	0.0102025	0.00973994	0.00174502	0.00679358	0.0152556	0.00925074	0.0112351	0.948642	0.094767	41	0.0127615	0.0129248	0.00168327	0.00764337	0.0161148	0.0120213	0.0138598	0.963838	0.21388
ADRA1B_	0.227821	0.440197	-1.21598	0.292471	0.505178	-0.54618	0.233036	0.450272	-1.5135	0.2201(0.0183-2.6484)	0.277778	0.878049	0.597403	0.570461	-0.000512893	36	0.0108429	0.0110342	0.00167148	0.00735549	0.013632	0.00947727	0.0121753	0.974936	0.574628	41	0.0113558	0.0113261	0.00202792	0.00727936	0.0172964	0.0101165	0.012624	0.977409	0.578663
ALK_1	0.915641	0.941691	0.106324	0.718562	0.853292	0.578574	0.913038	0.937715	0.0222367	1.0225(0.686-1.524)	0.5	0.682927	0.597403	0.52439	0.000279683	36	0.0297411	0.0252598	0.0125779	0.0134819	0.0624114	0.0201887	0.0361911	0.922173	0.0145873	41	0.0294615	0.0275484	0.0101744	0.0141254	0.0592801	0.0217882	0.0332882	0.91842	0.00607536
ALK_2	0.350062	0.546672	0.944372	0.741466	0.862521	0.64787	0.345881	0.547645	0.10601	1.1118(0.8919-1.386)	0.361111	0.829268	0.61039	0.522358	0.00537306	36	0.0402712	0.0293737	0.0319859	0.0144558	0.196952	0.024146	0.0430462	0.628366	2.5145e-08	41	0.0348981	0.0315995	0.0127288	0.0179931	0.0730435	0.026981	0.0401386	0.886849	0.00069384
ATP10A_	0.198077	0.403229	1.31145	0.601006	0.772321	0.255951	0.139392	0.318395	0.326841	1.3866(0.8989-2.1388)	0.388889	0.853659	0.636364	0.53523	0.0156772	36	0.0340296	0.0164909	0.0713649	0.00945854	0.441792	0.0122722	0.0304745	0.300965	6.37804e-12	41	0.0183523	0.0159705	0.00765977	0.0105474	0.0413492	0.0135235	0.0204879	0.812597	1.01966e-05
BHLHE40_1	0.293623	0.523016	1.05842	0.455202	0.665296	-0.112528	0.286347	0.513536	3.61458	37.1359(0.0483-28551.8552)	0.611111	0.439024	0.519481	0.449864	0.000170768	36	0.00923292	0.00912696	0.000767994	0.00748478	0.0114038	0.00875601	0.00947633	0.944312	0.0692755	41	0.00906215	0.00913236	0.000628935	0.00767795	0.0112252	0.00859235	0.0094505	0.944139	0.0436735
BHLHE40_2	0.101194	0.288403	1.66361	0.088953	0.220449	-1.34723	0.0985782	0.28319	1.10846	3.0297(0.8132-11.2881)	0.666667	0.625	0.644737	0.613889	0.00139835	36	0.00928538	0.00902022	0.00417953	0	0.0185185	0.00648024	0.0117458	0.990771	0.988612	40	0.00788703	0.00774005	0.00297514	0.00094162	0.013584	0.00571372	0.00947055	0.97315	0.450162
BHLHE40_3	NA	NA	NA	NA	NA	NA	NA	NA	NA	NA	NA	NA	NA	NA	NaN	0	NaN	NA	NA	Inf	-Inf	NA	NA	NA	NA	0	NaN	NA	NA	Inf	-Inf	NA	NA	NA	NA
C8orf44-SGK3_1	0.17116	0.375236	1.38174	0.0747226	0.202818	-1.44149	0.175173	0.36981	3.28276	26.6492(0.2315-3067.3357)	0.722222	0.585366	0.649351	0.618564	0.00030858	36	0.00806086	0.00810856	0.000934653	0.00582557	0.0100125	0.00763424	0.00862529	0.983771	0.863686	41	0.00775228	0.00765496	0.00102468	0.00548758	0.0104097	0.0073447	0.00816064	0.967019	0.274584
C8orf44-SGK3_2	0.680819	0.825674	0.413067	0.947402	0.955787	1.62017	0.673571	0.808285	0.626934	1.8719(0.1013-34.6026)	0.277778	0.853659	0.584416	0.495257	0.000148182	36	0.00786338	0.00758916	0.00166543	0.00503528	0.0115127	0.00670726	0.00884235	0.947769	0.0889599	41	0.0077152	0.00746027	0.00145514	0.00415527	0.0115079	0.00698322	0.00846455	0.969516	0.332479
C8orf44-SGK3_3	0.0684653	0.249837	1.8535	0.0482034	0.150564	-1.66253	0.068014	0.243355	0.2253	1.2527(0.9835-1.5956)	0.361111	0.926829	0.662338	0.631436	0.00861383	36	0.935397	0.936777	0.0229972	0.869751	0.969048	0.921763	0.953213	0.942024	0.058745	41	0.926783	0.930859	0.0168278	0.883848	0.964286	0.917633	0.937311	0.964957	0.233668
CDH13_1	0.0305593	0.13935	2.21712	0.0362957	0.125385	-1.79539	0.034377	0.163291	0.233389	1.2629(1.0173-1.5677)	0.611111	0.707317	0.662338	0.638889	0.0129723	36	0.0560986	0.0506224	0.0301668	0.0246944	0.175911	0.0332291	0.066472	0.824173	5.10959e-05	41	0.0431263	0.0349916	0.0191611	0.0206101	0.0896028	0.0298072	0.0589453	0.845991	5.98028e-05
CDH13_2	0.15191	0.346356	1.44877	0.167473	0.347127	-0.964197	0.149584	0.334365	0.213514	1.238(0.926-1.6552)	0.5	0.731707	0.623377	0.592141	0.00533144	36	0.0310932	0.0273522	0.0172374	0.0118226	0.084246	0.0159846	0.0444846	0.879092	0.000960107	41	0.0257618	0.0177084	0.0147253	0.0118083	0.0592765	0.015173	0.0334783	0.815725	1.19434e-05
CDH13_3	0.265979	0.497076	1.12161	0.407523	0.645245	-0.233921	0.258982	0.483999	0.121947	1.1297(0.9141-1.3961)	0.416667	0.780488	0.61039	0.555556	0.00564132	36	0.0365294	0.0243375	0.0239186	0.0120238	0.112803	0.0173023	0.0502362	0.851923	0.000210813	41	0.0308881	0.0218148	0.0196376	0.0129859	0.0831498	0.0176922	0.0378322	0.787839	3.0621e-06
CDH16_	0.00610335	0.0386546	2.82475	0.00856112	0.0406653	-2.38407	0.0104937	0.06646	0.217494	1.243(1.0522-1.4682)	0.527778	0.780488	0.662338	0.673442	0.0227914	36	0.864	0.865653	0.036078	0.786856	0.966234	0.842683	0.883834	0.984375	0.880271	41	0.841209	0.846849	0.0344484	0.688142	0.886753	0.821073	0.86274	0.822218	1.66625e-05
CHST2_1	0.127494	0.315963	-1.54228	0.0457728	0.150564	-1.6873	0.129467	0.318395	-0.814005	0.4431(0.1547-1.269)	0.583333	0.725	0.657895	0.633681	-0.00163829	36	0.0089178	0.00792106	0.00488438	0	0.026738	0.00626103	0.0108225	0.913152	0.00796687	40	0.0105561	0.0106275	0.00431593	0	0.02143	0.00770079	0.0134832	0.993699	0.998279
CHST2_2	0.481011	0.656445	0.708905	0.56611	0.750425	0.166479	0.467091	0.633422	0.97329	2.6466(0.1921-36.4701)	0.5	0.658537	0.584416	0.538618	0.000288518	36	0.00892305	0.00876379	0.00202517	0.00459452	0.0150656	0.00758507	0.00996947	0.967628	0.364348	41	0.00863453	0.00868096	0.00145614	0.00488331	0.0118346	0.00753282	0.00960133	0.987558	0.927251
CHST2_3	0.077599	0.252751	-1.78945	0.0817176	0.211723	-1.39361	0.0865848	0.274185	-2.22128	0.1085(0.0086-1.3761)	0.805556	0.414634	0.597403	0.615854	-0.000759266	36	0.00939938	0.00934485	0.00167303	0.00557053	0.0138242	0.00836979	0.0102677	0.986773	0.936335	41	0.0101587	0.0101264	0.0020478	0.00543879	0.0147047	0.00894624	0.0111875	0.971659	0.389948
CHST2_4	0.098842	0.288403	-1.68068	0.000409625	0.00333552	-3.34621	0.0966117	0.28319	-2.19085	0.1118(0.0084-1.4823)	0.638889	0.853659	0.753247	0.730352	-0.000982424	36	0.0110448	0.010085	0.00313736	0.00882772	0.0274023	0.00970529	0.0115737	0.541643	1.94441e-09	41	0.0120273	0.0121317	0.00167301	0.00855908	0.0146071	0.0108064	0.0132689	0.963547	0.208983
CHST2_5	0.000872854	0.00819702	-3.46911	0.000695065	0.00495234	-3.19669	0.00207185	0.0196826	-1.35242	0.2586(0.1094-0.6116)	0.5	0.902439	0.714286	0.721545	-0.00463579	36	0.0241406	0.0224657	0.00576414	0.0154421	0.04012	0.0197944	0.0286347	0.947956	0.0901736	41	0.0287764	0.0291679	0.00594761	0.0159982	0.0419693	0.0239572	0.0327277	0.987584	0.927841
COL26A1_1	0.0929159	0.278748	1.71907	0.436969	0.664193	-0.158659	0.0993649	0.28319	0.270455	1.3106(0.9501-1.8078)	0.416667	0.878049	0.662338	0.552168	0.00851303	36	0.0430052	0.0337244	0.0282747	0.0155366	0.175127	0.0268556	0.0503123	0.700788	2.91096e-07	41	0.0344921	0.0324195	0.00974485	0.020571	0.0619075	0.0283541	0.0375157	0.874213	0.000312739
COL26A1_2	0.0149782	0.0853756	2.51008	0.0102985	0.0434824	-2.31529	0.0200038	0.108592	0.580895	1.7876(1.0958-2.9163)	0.583333	0.756098	0.675325	0.669377	0.00666942	36	0.0267907	0.0240494	0.0138581	0.00843469	0.0734985	0.0185509	0.0322327	0.864876	0.00042689	41	0.0201212	0.0178836	0.00841054	0.00989924	0.0459435	0.0142875	0.0211632	0.835807	3.41867e-05
COL26A1_3	0.336178	0.539779	0.967955	0.368324	0.599841	-0.336297	0.337133	0.541313	2.34007	10.382(0.0873-1234.5771)	0.75	0.414634	0.571429	0.560298	0.000210957	36	0.00886548	0.00880388	0.000897113	0.00735658	0.0116089	0.00823996	0.00921916	0.935869	0.0378366	41	0.00865452	0.00848333	0.0010153	0.00597131	0.010958	0.00805449	0.0091928	0.974505	0.477524
DPP4_	0.000165318	0.00188463	-4.01068	9.41414e-07	1.78869e-05	-4.76561	0.000612785	0.00698575	-3.71468	0.0244(0.0029-0.204)	0.805556	0.780488	0.792208	0.811653	-0.00265314	36	0.0113557	0.0105566	0.00330894	0.0047412	0.0239095	0.00943643	0.0121967	0.828346	6.27539e-05	41	0.0140088	0.013743	0.00233926	0.00936098	0.0202785	0.0124519	0.0154153	0.985267	0.864199
DRAXIN_1	0.0745129	0.249837	-1.81683	0.0844101	0.213839	-1.376	0.0701842	0.243355	-0.278122	0.7572(0.5604-1.0232)	0.6	0.65	0.626667	0.616429	-0.00687006	35	0.0634257	0.0622304	0.0191315	0.0302428	0.106686	0.0489053	0.0754708	0.981519	0.807459	40	0.0702958	0.0703542	0.012395	0.042921	0.0975851	0.0616667	0.0791307	0.99296	0.996447
DRAXIN_2	0.935315	0.943592	-0.0815595	0.0714108	0.198557	-1.46536	0.931636	0.939881	-0.0658239	0.9363(0.2081-4.2126)	0.722222	0.512195	0.61039	0.619919	-5.84416e-05	36	0.0112819	0.0104935	0.00386054	0.00730308	0.0251931	0.00900357	0.011606	0.731783	9.28615e-07	41	0.0113404	0.0111438	0.00201931	0.00653154	0.0165912	0.0101292	0.0124667	0.960475	0.163424
DRAXIN_3	0.400278	0.602995	0.848482	0.931254	0.955787	1.48519	0.393982	0.586683	0.123267	1.1312(0.852-1.5019)	0.444444	0.756098	0.61039	0.506098	0.00359482	36	0.0355107	0.0286503	0.0231289	0.0149956	0.152255	0.0228484	0.04376	0.619759	1.91892e-08	41	0.0319158	0.0261354	0.0112565	0.0189955	0.0601422	0.0243065	0.0352078	0.824598	1.88569e-05
DRAXIN_4	0.191332	0.396579	1.32916	0.425048	0.663773	-0.188996	0.219532	0.439064	0.081926	1.0854(0.9523-1.237)	0.583333	0.634146	0.61039	0.553523	0.0176627	36	0.107673	0.0965872	0.0770376	0.026814	0.50092	0.0685343	0.115923	0.596585	9.44543e-09	41	0.0900098	0.0904424	0.0219336	0.0499431	0.135016	0.071535	0.106184	0.975792	0.52105
DUSP6_1	0.545425	0.698634	-0.607931	0.658742	0.80749	0.409032	0.531818	0.673636	-0.556795	0.573(0.1-3.2827)	0.194444	0.97561	0.61039	0.52981	-0.000371753	36	0.0086116	0.00860841	0.00303981	0.00302419	0.0173697	0.00684305	0.010448	0.965988	0.326285	41	0.00898336	0.00875513	0.00219263	0.00550165	0.015807	0.00745344	0.0100168	0.957914	0.132903
DUSP6_2	0.132965	0.322511	1.51905	0.0466429	0.150564	-1.67831	0.139647	0.318395	2.57193	13.0911(0.4314-397.2928)	0.777778	0.512195	0.636364	0.632114	0.000465945	36	0.0118993	0.0118318	0.00122352	0.00967619	0.0139748	0.0111582	0.012644	0.967363	0.357952	41	0.0114334	0.0111331	0.00146718	0.00946415	0.0158809	0.0104246	0.0118714	0.902175	0.00192339
DUSP6_3	NA	NA	NA	NA	NA	NA	NA	NA	NA	NA	NA	NA	NA	NA	NaN	0	NaN	NA	NA	Inf	-Inf	NA	NA	NA	NA	0	NaN	NA	NA	Inf	-Inf	NA	NA	NA	NA
DUSP6_4	0.139397	0.326002	-1.49575	0.0952131	0.226131	-1.30932	0.138129	0.318395	-3.76363	0.0232(2e-04-3.3576)	0.388889	0.853659	0.636364	0.611111	-0.000334513	36	0.00752325	0.00745262	0.00107031	0.0055312	0.0108766	0.00681552	0.00817139	0.940846	0.0539767	41	0.00785776	0.00772921	0.000863705	0.00654235	0.010372	0.00735759	0.00823172	0.943679	0.0421002
DUSP6_5	3.89493e-09	1.48007e-07	-6.68394	9.87191e-09	3.03508e-07	-5.61423	1.42471e-05	0.000324834	-0.428918	0.6512(0.5365-0.7904)	0.861111	0.731707	0.792208	0.857046	-0.0546158	36	0.0817439	0.0823813	0.035967	0.0180134	0.161361	0.0534948	0.109182	0.97936	0.723811	41	0.13636	0.135511	0.0355558	0.0496407	0.206182	0.110816	0.159954	0.98321	0.795015
E2F1_	0.467702	0.656445	-0.730071	0.538904	0.740182	0.097674	0.460643	0.633422	-2.62794	0.0722(1e-04-77.7438)	0.611111	0.585366	0.597403	0.541328	-0.000109194	36	0.00958223	0.00956102	0.000672204	0.00810616	0.0108011	0.00923137	0.0101687	0.977789	0.67034	41	0.00969142	0.00978126	0.000634479	0.00841273	0.0110323	0.00915968	0.0100831	0.970968	0.370609
FAM178B_1	0.674877	0.825674	-0.421824	0.827255	0.933148	0.943372	0.65865	0.798788	-0.178985	0.8361(0.3779-1.8498)	0.333333	0.902439	0.636364	0.514905	-0.000571245	36	0.963371	0.963824	0.00723829	0.947824	0.975305	0.95861	0.969037	0.963348	0.272091	41	0.963942	0.964222	0.00393971	0.954061	0.972882	0.961634	0.966727	0.989718	0.96837
FAM178B_2	0.804141	0.902974	-0.248871	0.248114	0.45621	-0.680436	0.802749	0.899043	-0.0190502	0.9811(0.8449-1.1393)	0.611111	0.609756	0.61039	0.577236	-0.00170988	36	0.899101	0.898715	0.028235	0.807341	0.958174	0.882249	0.911552	0.945356	0.0747049	41	0.900811	0.906655	0.0320538	0.800109	0.937317	0.890795	0.923556	0.804059	6.67048e-06
GABBR2_1	0.331215	0.539408	-0.978906	0.203784	0.383032	-0.82818	0.321085	0.53829	-0.0952651	0.9091(0.7532-1.0974)	0.388889	0.875	0.644737	0.585417	-0.00562126	36	0.0656749	0.0592411	0.0277766	0.0236976	0.142214	0.0455542	0.0864564	0.960235	0.218577	40	0.0712961	0.0652785	0.0214882	0.0382441	0.128209	0.0568038	0.0854673	0.946558	0.0577664
GABBR2_2	0.283836	0.513609	1.08022	0.269675	0.48079	-0.613797	0.274913	0.505485	0.12691	1.1353(0.904-1.4258)	0.555556	0.682927	0.623377	0.573848	0.00500112	36	0.0590756	0.0581184	0.0218978	0.0253768	0.104218	0.0416435	0.0733311	0.966671	0.341723	41	0.0540745	0.0469903	0.0182398	0.0346608	0.0999657	0.0410079	0.0615099	0.83127	2.68017e-05
GABBR2_3	0.705611	0.829275	-0.379339	0.538904	0.740182	0.097674	0.697811	0.820108	-0.0537133	0.9477(0.7226-1.2429)	0.5	0.707317	0.61039	0.458672	-0.00147122	36	0.0425989	0.0460527	0.0183452	0.0130877	0.0841338	0.0268113	0.055991	0.950796	0.110784	41	0.0440702	0.0381285	0.0152783	0.0279993	0.0773227	0.0327749	0.0487815	0.822585	1.69829e-05
GABBR2_4	0.492301	0.657835	0.690494	0.658742	0.80749	0.409032	0.480799	0.637339	0.367317	1.4439(0.52-4.0088)	0.333333	0.853659	0.61039	0.52981	0.000715056	36	0.0169362	0.0154785	0.00500778	0.00948078	0.0308003	0.0135313	0.0197252	0.920039	0.0126211	41	0.0162212	0.0153691	0.00392529	0.0111256	0.0285611	0.013665	0.0174561	0.882149	0.000513617
GALNT7_1	NA	NA	NA	NA	NA	NA	NA	NA	NA	NA	NA	NA	NA	NA	NaN	0	NaN	NA	NA	Inf	-Inf	NA	NA	NA	NA	0	NaN	NA	NA	Inf	-Inf	NA	NA	NA	NA
GALNT7_2	0.496261	0.657835	0.68386	0.461373	0.665779	-0.0969756	0.489278	0.641123	1.59674	4.9369(0.0534-456.1548)	0.611111	0.512195	0.558442	0.549458	0.000158295	36	0.00869254	0.00861408	0.00104848	0.00642211	0.0116691	0.00806296	0.0092483	0.983531	0.856847	41	0.00853425	0.00844816	0.000971988	0.00673203	0.0116047	0.00795222	0.00908225	0.968085	0.298136
GALNT7_3	0.46195	0.656445	-0.739568	0.33664	0.556188	-0.42165	0.455589	0.633422	-3.40564	0.0332(0-254.8319)	0.5	0.780488	0.649351	0.564363	-8.66852e-05	36	0.00751127	0.00738932	0.000525869	0.00633249	0.00879059	0.00715557	0.00787283	0.98596	0.919229	41	0.00759795	0.00760505	0.000498322	0.00604845	0.00887545	0.00736125	0.00788685	0.970612	0.360971
GALNTL6_1	0.00386655	0.0275492	2.99339	0.00174095	0.0104457	-2.92164	0.00589624	0.0420107	0.245794	1.2786(1.0734-1.5231)	0.805556	0.609756	0.701299	0.705285	0.0198372	36	0.0676311	0.0685577	0.0318741	0.0167658	0.158387	0.0421483	0.0844886	0.954694	0.146914	41	0.0477939	0.0377402	0.0253679	0.0192187	0.111406	0.0312971	0.0585186	0.805026	6.99535e-06
GALNTL6_2	0.0219792	0.10894	2.34294	0.0138871	0.0545907	-2.20046	0.0259759	0.12875	0.169414	1.1846(1.0205-1.3751)	0.75	0.560976	0.649351	0.662602	0.0174954	36	0.0666858	0.0591263	0.0346985	0.0123506	0.156252	0.0403231	0.0857382	0.93905	0.0474609	41	0.0491904	0.0399724	0.0302486	0.00555556	0.118643	0.0247664	0.0606534	0.889225	0.000809474
GAP43_	0.171018	0.375236	1.39634	0.0607439	0.17312	-1.54856	0.0895974	0.276057	0.261455	1.2988(0.9604-1.7565)	0.611111	0.707317	0.662338	0.624661	0.0209813	36	0.0720147	0.0565534	0.0891296	0.027162	0.582303	0.0440686	0.0675375	0.311155	7.88285e-12	41	0.0510335	0.0474418	0.0144707	0.0315328	0.0918265	0.0409655	0.0571398	0.904776	0.00230099
GRM5_	0.01783	0.092944	2.4509	0.0102985	0.0434824	-2.31529	0.0196649	0.108592	0.129239	1.138(1.0209-1.2685)	0.722222	0.585366	0.649351	0.669377	0.0356702	36	0.133007	0.113287	0.0793213	0.0445693	0.484594	0.0837767	0.149036	0.73943	1.25148e-06	41	0.0973365	0.0859219	0.0389713	0.048881	0.189035	0.0700349	0.123345	0.889103	0.000803065
HTR7_1	0.00411668	0.027606	2.99815	0.00755179	0.039132	-2.42989	0.00645212	0.0432672	0.136693	1.1465(1.0391-1.265)	0.611111	0.682927	0.649351	0.676152	0.0401673	36	0.194362	0.180036	0.071164	0.0906494	0.394777	0.142837	0.225721	0.919117	0.0118598	41	0.154195	0.147068	0.0398923	0.0909272	0.239003	0.126284	0.17975	0.944402	0.044602
HTR7_2	0.27916	0.513295	1.0901	0.874995	0.942108	1.15032	0.288301	0.513536	1.01238	2.7522(0.4247-17.8332)	0.777778	0.365854	0.558442	0.48916	0.000640511	36	0.0127003	0.0127311	0.00236927	0.00830545	0.0210735	0.0112978	0.0132129	0.895218	0.00253173	41	0.0120598	0.012748	0.00278597	0	0.0156207	0.0105682	0.0139688	0.830764	2.60898e-05
ITGA2_	0.0262307	0.124596	-2.34314	0.0197253	0.0749563	-2.05945	0.0368926	0.163795	-0.847761	0.4284(0.1932-0.9497)	0.5625	0.933333	0.741935	0.745833	-0.0083974	16	0.00766807	0.0041521	0.00993474	0	0.0320513	0	0.0104396	0.776207	0.00133844	15	0.0160655	0.0128205	0.0100063	0	0.027972	0.00833333	0.0277223	0.871516	0.0355173
KIAA1549L_1	0.124356	0.315963	-1.55493	0.10589	0.246356	-1.24869	0.124115	0.318395	-0.0676553	0.9346(0.8574-1.0188)	0.638889	0.609756	0.623377	0.607724	-0.0191191	36	0.855729	0.857727	0.0557365	0.720796	0.960933	0.822534	0.897463	0.976234	0.61767	41	0.874848	0.8865	0.0515815	0.757107	0.948055	0.84231	0.913926	0.932136	0.0170128
KIAA1549L_2	0.0352249	0.150751	-2.1508	0.0526729	0.153967	-1.61947	0.0373568	0.163795	-0.21137	0.8095(0.6634-0.9877)	0.694444	0.609756	0.649351	0.628726	-0.0121062	36	0.933587	0.936484	0.0275222	0.850316	0.972399	0.916901	0.957319	0.942185	0.0594283	41	0.945693	0.952738	0.0208878	0.896388	0.969465	0.929424	0.960854	0.865481	0.000184187
KRT19_	0.121622	0.315963	1.56937	0.180466	0.367377	-0.913592	0.11936	0.318395	0.176856	1.1935(0.9553-1.491)	0.444444	0.756098	0.61039	0.589431	0.00780649	36	0.0444617	0.0352934	0.0248153	0.0175839	0.115002	0.0258012	0.0515599	0.858375	0.000298464	41	0.0366552	0.0304051	0.0176962	0.0167792	0.081344	0.02403	0.0438943	0.851679	8.24083e-05
LIPH_	0.521729	0.675876	-0.645134	0.875995	0.942108	1.1552	0.511003	0.661982	-0.0452832	0.9557(0.835-1.0939)	0.5	0.625	0.565789	0.510764	-0.00544373	36	0.926038	0.939881	0.0454994	0.700952	0.969716	0.912164	0.949085	0.650165	5.07876e-08	40	0.931481	0.935649	0.0234067	0.872449	0.973214	0.920614	0.948114	0.964555	0.238958
LRP4_	0.83794	0.902974	-0.205251	0.545645	0.740518	0.114665	0.835624	0.899043	-0.175425	0.8391(0.16-4.4002)	0.75	0.487805	0.61039	0.54065	-0.0001289	36	0.0101985	0.00955085	0.00272724	0.0067409	0.0205263	0.00860844	0.0105369	0.807451	2.29768e-05	41	0.0103274	0.0103133	0.00277479	0.00627115	0.0228471	0.00839304	0.0114244	0.821557	1.61028e-05
MATN2_	0.183093	0.386529	1.34548	0.0931837	0.22602	-1.3214	0.181507	0.376214	0.343847	1.4104(0.8517-2.3355)	0.777778	0.439024	0.597403	0.611789	0.00293258	36	0.0189253	0.0144812	0.0105768	0.00963899	0.053271	0.012013	0.0229182	0.779622	6.57554e-06	41	0.0159927	0.0125841	0.00820769	0.0085643	0.0420881	0.0106544	0.018093	0.774054	1.62204e-06
MCF2L2_1	0.00184098	0.0139914	3.23453	0.00199881	0.0113932	-2.87835	0.0045393	0.0344987	0.264585	1.3029(1.0853-1.5641)	0.742857	0.625	0.68	0.708214	0.0229533	35	0.873322	0.871951	0.0304037	0.784483	0.940972	0.859623	0.890681	0.968572	0.40525	40	0.850369	0.85613	0.0309496	0.761399	0.9	0.833659	0.876391	0.939054	0.0321358
MCF2L2_2	0.669943	0.825674	-0.429107	0.0231366	0.0850828	-1.99289	0.65447	0.798788	-0.53133	0.5878(0.0574-6.0226)	0.527778	0.731707	0.636364	0.650407	-0.000216117	36	0.00918274	0.00869827	0.002845	0.00639462	0.0247701	0.00813755	0.00945726	0.472695	3.1673e-10	41	0.00939886	0.00936717	0.00108711	0.00752015	0.0114351	0.00864663	0.010366	0.967804	0.291777
MET_	0.319071	0.535869	1.00353	0.891018	0.949309	1.23196	0.311774	0.533831	0.717942	2.0502(0.5101-8.2408)	0.833333	0.317073	0.558442	0.490515	0.000764501	36	0.0117849	0.0107515	0.00354925	0.00593594	0.0209046	0.00917572	0.0131123	0.913293	0.00804103	41	0.0110204	0.0108997	0.00307372	0.00432432	0.017667	0.00955271	0.0135092	0.972442	0.412794
NELL2_1	0.246564	0.468472	1.16902	0.436969	0.664193	-0.158659	0.23848	0.453112	0.177856	1.1947(0.8888-1.6057)	0.5	0.682927	0.597403	0.552168	0.00421255	36	0.0345415	0.0309308	0.0173493	0.0135362	0.0829545	0.0200159	0.0462995	0.911719	0.00724918	41	0.030329	0.0245991	0.0137692	0.0165871	0.0699076	0.0203086	0.0388247	0.843642	5.24785e-05
NELL2_2	0.322899	0.535869	-0.995365	0.602952	0.772321	0.260996	0.327539	0.541151	-0.518787	0.5952(0.2107-1.6816)	0.972222	0.175	0.552632	0.535069	-0.00101411	36	0.0134218	0.0132861	0.00380059	0.0034965	0.0227273	0.01109	0.0159779	0.989111	0.973283	40	0.0144359	0.0138614	0.00504688	0.00551471	0.0283058	0.0116383	0.0161945	0.945224	0.0520093
NPC2_1	0.448089	0.64661	-0.76261	0.0817176	0.211723	-1.39361	0.450664	0.633422	-1.50383	0.2223(0.0045-11.0644)	0.777778	0.487805	0.623377	0.615854	-0.000204842	36	0.00870912	0.00876722	0.00108683	0.00686029	0.0123688	0.00803425	0.00918847	0.929083	0.0234787	41	0.00891396	0.0091335	0.00126999	0.00340136	0.0119049	0.00819966	0.00961059	0.844008	5.35545e-05
NPC2_2	0.814223	0.902974	0.235811	0.680947	0.825829	0.470349	0.813182	0.899043	0.65773	1.9304(0.0083-451.5793)	0.611111	0.536585	0.571429	0.527778	4.43768e-05	36	0.0104579	0.0103592	0.000760946	0.00919448	0.0125168	0.00983959	0.0108292	0.955441	0.155048	41	0.0104135	0.0105736	0.000890249	0.00834964	0.0118862	0.0101002	0.0110564	0.951815	0.0810573
NPC2_3	0.820993	0.902974	0.227065	0.741466	0.862521	0.64787	0.820307	0.899043	0.627428	1.8728(0.0083-420.4382)	0.694444	0.463415	0.571429	0.522358	4.29348e-05	36	0.00790845	0.00785674	0.000752158	0.00620689	0.00967602	0.00751263	0.00827128	0.987115	0.942885	41	0.00786552	0.00785335	0.00090641	0.00624571	0.0100642	0.00710074	0.00851262	0.980052	0.677487
NRCAM_1	0.483697	0.656445	0.704806	0.629594	0.788722	0.330779	0.471959	0.633422	0.346709	1.4144(0.5499-3.6381)	0.555556	0.634146	0.597403	0.53252	0.000816285	36	0.0145133	0.0133793	0.00591589	0.00889929	0.0406204	0.0108593	0.0160725	0.676659	1.24e-07	41	0.013697	0.0123257	0.00389065	0.00879316	0.0269334	0.011289	0.0158122	0.854745	9.82012e-05
NRCAM_2	0.69581	0.826275	0.39268	1	1	Inf	0.687329	0.816203	0.188594	1.2076(0.482-3.0253)	0.388889	0.731707	0.571429	0.5	0.000450137	36	0.018685	0.0171905	0.00551897	0.0116407	0.0381509	0.0155007	0.021001	0.845277	0.000148466	41	0.0182349	0.017361	0.00438028	0.0115534	0.0330363	0.0156807	0.0192847	0.883422	0.000556895
NRCAM_3	3.8207e-05	0.000483955	-4.37877	4.51375e-05	0.000467789	-3.91534	0.000313699	0.00397351	-3.58337	0.0278(0.004-0.1951)	0.75	0.707317	0.727273	0.76355	-0.00279229	36	0.0159949	0.0152826	0.00267854	0.0110107	0.0222442	0.01434	0.0173389	0.956102	0.162616	41	0.0187872	0.0186953	0.00291572	0.0135241	0.0256096	0.0167025	0.0205968	0.981341	0.726236
NRP2_	0.175597	0.377699	1.36834	0.204956	0.383032	-0.82405	0.173575	0.36981	0.215448	1.2404(0.9095-1.6918)	0.75	0.463415	0.597403	0.584688	0.0047376	36	0.0466752	0.0462196	0.0161336	0.0141997	0.093564	0.0384798	0.0527294	0.954577	0.145681	41	0.0419376	0.0408758	0.0139659	0.0174419	0.0823591	0.0314434	0.0507782	0.955398	0.108389
PRR15_1	0.324342	0.535869	-0.99509	0.564274	0.750425	0.161813	0.308142	0.533831	-0.0282539	0.9721(0.9207-1.0264)	0.454545	0.675676	0.571429	0.459459	-0.0218893	33	0.305353	0.318487	0.10963	0.0833333	0.561667	0.249118	0.366667	0.973206	0.57355	37	0.327242	0.318216	0.0665432	0.220238	0.481373	0.290476	0.35704	0.940543	0.0479968
PRR15_2	3.02009e-05	0.000430363	-4.5239	1.27406e-05	0.000161381	-4.21049	0.000235522	0.0033562	-1.44857	0.2349(0.1085-0.5084)	0.527778	0.97561	0.766234	0.780488	-0.00831063	36	0.027034	0.026788	0.00942551	0.00216685	0.0504965	0.0204627	0.0326784	0.987266	0.945662	41	0.0353446	0.0351964	0.00609803	0.0247683	0.0493851	0.0303589	0.0387115	0.969374	0.328935
PRR15_3	0.916909	0.941691	0.104845	0.201318	0.383032	-0.836923	0.912186	0.937715	0.0328475	1.0334(0.5764-1.8527)	0.444444	0.878049	0.675325	0.585366	0.000193022	36	0.0189246	0.0155105	0.0099271	0.00930455	0.0582524	0.0127563	0.0206169	0.78825	9.59694e-06	41	0.0187316	0.0174159	0.00517008	0.0101095	0.034331	0.0152455	0.0206727	0.905483	0.00241655
PRR15_4	0.117424	0.315963	-1.58813	0.00939448	0.0428388	-2.34969	0.114184	0.317487	-0.720611	0.4865(0.1989-1.1895)	0.583333	0.780488	0.688312	0.671409	-0.00202894	36	0.0161118	0.0148048	0.00643747	0.00690777	0.0377033	0.0113235	0.0179845	0.880673	0.00105327	41	0.0181407	0.017925	0.00444098	0.0110822	0.030357	0.0155873	0.0200379	0.942041	0.0369477
PRR15_5	0.0448068	0.179894	-2.05318	0.000332222	0.00291333	-3.40385	0.0468858	0.188348	-2.41305	0.0895(0.0083-0.9674)	0.666667	0.829268	0.753247	0.73374	-0.00109061	36	0.00979662	0.00884079	0.00278854	0.00711235	0.0192192	0.00819671	0.0103651	0.762225	3.14417e-06	41	0.0108872	0.0107669	0.00164691	0.00789914	0.0166061	0.00987839	0.0116638	0.948888	0.0639661
PRR15_6	0.12698	0.315963	1.56198	0.443	0.6645	-0.143367	0.169236	0.36981	0.0939839	1.0985(0.9608-1.2561)	0.277778	0.926829	0.623377	0.551491	0.0410528	36	0.0841529	0.0389801	0.156304	0.0105985	0.906244	0.0299215	0.0742602	0.412688	7.40912e-11	41	0.0431001	0.0359317	0.0223019	0.0195192	0.136186	0.0281829	0.0527345	0.793553	4.01242e-06
RAB27A_1	0.210288	0.420576	1.26365	0.274135	0.48079	-0.600355	0.211207	0.429958	5.02538	152.2288(0.0577-401753.8858)	0.527778	0.658537	0.597403	0.573171	0.000168844	36	0.00786911	0.00794244	0.00056828	0.00661429	0.00903651	0.00748678	0.00823421	0.991003	0.990109	41	0.00770027	0.00775369	0.00060348	0.00621915	0.00890464	0.00725379	0.00815944	0.989617	0.96688
RAB27A_2	0.476162	0.656445	0.716118	0.316511	0.538542	-0.477477	0.472288	0.633422	1.90294	6.7056(0.0374-1202.4313)	0.611111	0.634146	0.623377	0.567073	0.000143896	36	0.00902955	0.00908939	0.000863673	0.00675629	0.0104666	0.00851742	0.00949772	0.967453	0.360115	41	0.00888566	0.0088204	0.000897722	0.00662762	0.0107643	0.00839777	0.00956801	0.96772	0.289891
RASD2_1	0.0643537	0.244544	-1.88447	0.000641701	0.00487693	-3.21967	0.0704448	0.243355	-2.91645	0.0541(0.0023-1.2755)	0.611111	0.878049	0.753247	0.7229	-0.000768254	36	0.0104883	0.00977181	0.00207099	0.00818567	0.0186838	0.00939366	0.0110348	0.742194	1.39581e-06	41	0.0112565	0.0109839	0.00138906	0.00919246	0.0157485	0.0103148	0.0119716	0.855469	0.000102384
RASD2_2	0.0457626	0.179894	-2.03734	0.0251057	0.0894389	-1.95816	0.0479132	0.188348	-2.30625	0.0996(0.0101-0.9791)	0.388889	1	0.714286	0.648374	-0.00102926	36	0.0116316	0.0112874	0.00248975	0.00833867	0.0184338	0.00934094	0.013351	0.926966	0.0202707	41	0.0126608	0.0124584	0.00184511	0.0105982	0.0179143	0.0112044	0.0132692	0.845966	5.97188e-05
RASD2_3	0.831717	0.902974	-0.213255	0.947402	0.955787	1.62017	0.832141	0.899043	-0.0415563	0.9593(0.6532-1.4088)	0.555556	0.560976	0.558442	0.495257	-0.000571031	36	0.0289156	0.0274986	0.010162	0.0142462	0.0564761	0.0224749	0.0307075	0.874933	0.000754288	41	0.0294866	0.0254754	0.0132802	0.0186749	0.100317	0.0230009	0.0321557	0.560678	6.97183e-10
RFX8_	0.886931	0.927615	0.142693	0.814929	0.929019	0.896208	0.884792	0.925379	0.0178254	1.018(0.7999-1.2956)	0.583333	0.625	0.605263	0.515972	0.000621624	36	0.0258398	0.020775	0.0194423	0.00961538	0.120421	0.017003	0.0260072	0.597595	9.73626e-09	40	0.0252182	0.0218165	0.0184151	0.00782051	0.113491	0.016176	0.0271456	0.596872	2.83631e-09
RUNX1_1	0.771114	0.887949	0.292209	0.931254	0.955787	1.48519	0.762233	0.877723	0.0327836	1.0333(0.8356-1.2778)	0.472222	0.682927	0.584416	0.493902	0.00145806	36	0.0778512	0.078812	0.0250917	0.0473841	0.149357	0.0559374	0.0893363	0.920936	0.0134117	41	0.0763931	0.0697936	0.0174295	0.0508057	0.120901	0.0645684	0.0875556	0.927258	0.011724
RUNX1_2	0.96825	0.96825	0.0399378	0.768172	0.884562	0.732841	0.967835	0.967835	0.0372868	1.038(0.1695-6.3577)	0.611111	0.5	0.552632	0.479861	2.30123e-05	36	0.00823796	0.00841241	0.00242457	0.00230415	0.0147951	0.00722026	0.00975619	0.964878	0.302449	40	0.00821495	0.00851521	0.00259783	0.00460829	0.0194938	0.0062353	0.00947749	0.825845	2.4551e-05
RUNX1_3	NA	NA	NA	NA	NA	NA	NA	NA	NA	NA	NA	NA	NA	NA	NaN	0	NaN	NA	NA	Inf	-Inf	NA	NA	NA	NA	0	NaN	NA	NA	Inf	-Inf	NA	NA	NA	NA
RUNX1_4	3.77975e-09	1.48007e-07	-6.72372	2.64685e-10	3.01741e-08	-6.21014	1.25559e-05	0.000324834	-1.73949	0.1756(0.0805-0.3833)	0.805556	0.878049	0.844156	0.886856	-0.0127656	36	0.0127891	0.00988994	0.00670455	0.00701719	0.0352841	0.00909012	0.0129804	0.724522	7.02755e-07	41	0.0255547	0.0261786	0.00982833	0.0107674	0.0436841	0.0164536	0.0328644	0.946488	0.0527214
RUNX1_5	0.731298	0.850694	0.344793	0.867002	0.942108	1.11233	0.724459	0.842737	0.0191467	1.0193(0.9164-1.1338)	0.472222	0.780488	0.636364	0.511518	0.00339019	36	0.0796464	0.0858287	0.0461965	0.017229	0.179622	0.0368845	0.107747	0.932306	0.0294164	41	0.0762562	0.065728	0.0391577	0.0362955	0.204542	0.0499775	0.0873805	0.806619	7.56738e-06
RUNX1_6	0.860349	0.916633	0.176676	0.947402	0.955787	1.62017	0.854645	0.910556	0.00368862	1.0037(0.9649-1.0441)	0.166667	0.95122	0.584416	0.495257	0.00474749	36	0.29164	0.293943	0.135506	0.0682204	0.6125	0.199206	0.381577	0.969705	0.417543	41	0.286892	0.265974	0.0932318	0.101934	0.55689	0.231353	0.333077	0.967042	0.275079
RUNX2_1	0.00167827	0.0136659	-3.26078	0.000846757	0.00567826	-3.1393	0.00386968	0.0315103	-7.57897	5e-04(0-0.0875)	0.666667	0.756098	0.714286	0.718157	-0.000721481	36	0.0120292	0.0119209	0.00085961	0.0105287	0.0143419	0.0114087	0.0124843	0.948842	0.0961533	41	0.0127507	0.0126715	0.00107965	0.0100912	0.0147357	0.0122473	0.0134934	0.979822	0.668784
RUNX2_2	2.76307e-06	5.24983e-05	-5.07807	9.77294e-06	0.000139264	-4.27002	8.43001e-05	0.0016017	-4.62391	0.0098(0.001-0.0984)	0.805556	0.804878	0.805195	0.783875	-0.00285187	36	0.0144019	0.0137696	0.00214672	0.0100147	0.0195653	0.0132122	0.014905	0.87906	0.00095834	41	0.0172537	0.0171512	0.00277182	0.0118539	0.0240165	0.0158949	0.0190689	0.983115	0.791617
RUNX2_3	6.08606e-06	9.91159e-05	-4.8804	7.8809e-06	0.000128346	-4.31776	0.000146887	0.00239216	-6.8118	0.0011(0-0.0371)	0.805556	0.731707	0.766234	0.786585	-0.00193277	36	0.0144437	0.0145738	0.00177393	0.0109144	0.0183664	0.0135294	0.0152779	0.971636	0.471898	41	0.0163764	0.0163355	0.00168713	0.012816	0.0211682	0.0152525	0.0174181	0.978378	0.614416
RUNX2_4	0.518527	0.675876	0.652188	2.36751e-05	0.000269897	-4.06833	0.525537	0.67316	0.0544382	1.0559(0.8926-1.2492)	0.722222	0.853659	0.792208	0.772358	0.00545571	36	0.023103	0.0140802	0.0501518	0.00845905	0.31479	0.0127945	0.0161215	0.212515	1.10529e-12	41	0.0176473	0.0177376	0.00212932	0.0119734	0.0228897	0.0168075	0.0187134	0.974924	0.49143
SFTPB_	0.439726	0.642676	-0.777168	0.326476	0.547328	-0.449664	0.430121	0.628639	-0.16425	0.8485(0.5642-1.2761)	0.611111	0.560976	0.584416	0.565718	-0.00202179	36	0.251953	0.25267	0.0122615	0.225887	0.292019	0.244834	0.258914	0.947517	0.0873532	41	0.253975	0.255374	0.0103077	0.229824	0.278612	0.247555	0.260038	0.984022	0.823392
SHC3_1	0.085097	0.262191	1.76511	0.108133	0.246544	-1.23652	0.127625	0.318395	0.137244	1.1471(0.9614-1.3686)	0.666667	0.609756	0.636364	0.607046	0.0204763	36	0.0938573	0.0793315	0.0670463	0.0404227	0.37884	0.0652347	0.0958505	0.570054	4.33075e-09	41	0.0733809	0.0679033	0.0199507	0.0439603	0.125624	0.0610383	0.0808302	0.902386	0.00195147
SHC3_2	0.401997	0.602995	0.84591	0.579953	0.759938	0.201773	0.383134	0.586683	0.101069	1.1064(0.8816-1.3885)	0.361111	0.95122	0.675325	0.537263	0.00424719	36	0.0417696	0.0318231	0.0280101	0.0115624	0.156473	0.0235582	0.0515709	0.798786	1.54081e-05	41	0.0375224	0.0331987	0.0118338	0.0217321	0.0728944	0.0291659	0.042206	0.86339	0.000162648
SHC4_	0.140124	0.326002	1.49153	0.155189	0.333802	-1.01443	0.139409	0.318395	0.0453129	1.0464(0.9853-1.1112)	0.638889	0.634146	0.636364	0.594851	0.0260247	36	0.246841	0.255045	0.0774119	0.0857607	0.397153	0.180161	0.315608	0.966276	0.332707	41	0.220816	0.195556	0.0752143	0.121268	0.388787	0.166361	0.285778	0.892061	0.000974788
SLC1A5_1	0.000934748	0.00819702	-3.45081	0.000138835	0.00131893	-3.63529	0.00230973	0.0202545	-2.43863	0.0873(0.0182-0.4189)	0.805556	0.609756	0.701299	0.74729	-0.00269046	36	0.012657	0.0117762	0.00348922	0.00800052	0.0254167	0.00970084	0.0144343	0.884651	0.00133275	41	0.0153475	0.015604	0.00332522	0.00697286	0.0220052	0.0131377	0.0171493	0.984124	0.826889
SLC1A5_2	0.347341	0.546672	-0.94822	0.0489822	0.150564	-1.6548	0.332589	0.541313	-0.439077	0.6446(0.2652-1.5669)	0.527778	0.780488	0.662338	0.630759	-0.00123721	36	0.0171343	0.0159504	0.00696084	0.00844208	0.047153	0.0128419	0.0197375	0.798418	1.51522e-05	41	0.0183715	0.0188045	0.00382314	0.00937574	0.026412	0.0166921	0.020525	0.96168	0.180038
SLC25A21_	0.0809004	0.256185	1.77542	0.124896	0.27918	-1.15085	0.0809803	0.263765	0.0994172	1.1045(0.9878-1.235)	0.416667	0.804878	0.623377	0.602304	0.0180395	36	0.0599618	0.0388206	0.0515896	0.00533333	0.223492	0.0187088	0.093407	0.859933	0.000324966	41	0.0419223	0.0313062	0.0346656	0.00363636	0.143478	0.0146602	0.0543043	0.842181	4.8408e-05
SPOCD1_	0.00952368	0.0571421	2.66586	0.00664925	0.0360959	-2.47567	0.0127507	0.0765041	0.0744926	1.0773(1.016-1.1424)	0.75	0.658537	0.701299	0.678862	0.0522178	36	0.591304	0.600166	0.0908431	0.449819	0.898306	0.528749	0.634098	0.928387	0.0223688	41	0.539087	0.508474	0.0795733	0.415175	0.711763	0.482991	0.567188	0.865884	0.000188669
STAC_1	0.932942	0.943592	0.0844803	0.449078	0.664869	-0.127991	0.930388	0.939881	0.0204176	1.0206(0.6455-1.6137)	0.361111	0.878049	0.636364	0.550813	0.000194874	36	0.024857	0.0195566	0.0114473	0.0110389	0.061511	0.016789	0.0305995	0.873257	0.000685088	41	0.0246621	0.02132	0.00830188	0.0132166	0.048584	0.0188071	0.0269693	0.873383	0.000297174
STAC_2	0.32133	0.535869	1.18156	0.533333	0.740182	0.0836517	0.453645	0.633422	0.202774	1.2248(0.7207-2.0816)	0.75	1	0.833333	0.75	0.159454	4	0.246007	0.144628	0.268847	0.0511364	0.643636	0.113817	0.276818	0.777146	0.0671531	2	0.086553	0.086553	0.0168741	0.0746212	0.0984848	0.0805871	0.0925189	NA	NA
SYT1_1	0.693932	0.826275	-0.510061	0.695943	0.835131	0.512766	0.391543	0.586683	-0.317984	0.7276(0.3516-1.5059)	0.5	1	0.857143	0.65	-0.0180473	2	0.0346154	0.0346154	0.0489535	0	0.0692308	0.0173077	0.0519231	NA	NA	5	0.0526627	0.0461538	0.0163874	0.035503	0.0710059	0.0414201	0.0692308	0.85519	0.211486
SYT1_2	0.0736133	0.249837	-1.81525	0.204956	0.383032	-0.82405	0.0807953	0.263765	-0.24302	0.7843(0.597-1.0302)	0.555556	0.658537	0.61039	0.584688	-0.00751601	36	0.571499	0.572575	0.0185336	0.503494	0.604321	0.562533	0.581025	0.916839	0.0101774	41	0.579015	0.575571	0.0176546	0.550835	0.622125	0.566018	0.592581	0.952278	0.0841561
TFCP2L1_1	0.839607	0.902974	0.203137	0.923189	0.955787	1.42685	0.835953	0.899043	0.188892	1.2079(0.2021-7.2196)	0.944444	0.170732	0.532468	0.493225	0.000118444	36	0.0148828	0.0145986	0.00266859	0.0108571	0.021309	0.012786	0.0161808	0.939122	0.0477046	41	0.0147644	0.0144546	0.00241425	0.0106415	0.0209738	0.0130019	0.0164994	0.977805	0.593171
TFCP2L1_2	0.0357041	0.150751	2.13895	0.00804247	0.0398627	-2.40698	0.0411036	0.173548	0.340786	1.4061(1.0139-1.95)	0.916667	0.414634	0.649351	0.674797	0.00697497	36	0.0329755	0.0311882	0.0137448	0.0123543	0.0671333	0.0221069	0.0422425	0.95377	0.13742	41	0.0260005	0.020068	0.0148601	0.00892857	0.058288	0.0148949	0.0327449	0.835041	3.28025e-05
TIAM1_1	0.604982	0.75789	-0.51993	0.197727	0.383032	-0.849768	0.591356	0.73745	-0.284232	0.7526(0.2666-2.1243)	0.388889	0.902439	0.662338	0.586043	-0.000535205	36	0.0153086	0.0138968	0.00517256	0.00857996	0.0269333	0.0112395	0.0176727	0.895414	0.00256262	41	0.0158438	0.0152039	0.00360182	0.00916643	0.0279608	0.0134366	0.0173748	0.952665	0.0868361
TIAM1_2	0.410095	0.607154	0.831038	0.843107	0.933148	1.00731	0.396268	0.586683	0.18958	1.2087(0.78-1.8731)	0.527778	0.585366	0.558442	0.48645	0.00219829	36	0.0256987	0.0223957	0.0145841	0.0114323	0.0917326	0.0178363	0.0276745	0.695769	2.42926e-07	41	0.0235004	0.0208204	0.00668199	0.0137229	0.0409869	0.0189883	0.0259728	0.87513	0.000330941
TIAM1_3	3.07044e-09	1.48007e-07	-6.72188	7.27036e-09	3.03508e-07	-5.6669	6.25595e-06	0.000324834	-5.68397	0.0034(3e-04-0.04)	0.777778	0.853659	0.818182	0.859756	-0.00383294	36	0.0117955	0.0113169	0.00234872	0.00759066	0.0180675	0.0100389	0.0127286	0.945518	0.0755861	41	0.0156285	0.0157327	0.00265489	0.00997628	0.0206898	0.01412	0.0171858	0.98114	0.718657
TIAM1_4	4.10618e-08	9.3621e-07	-6.10979	1.54972e-08	3.53337e-07	-5.53572	1.17291e-05	0.000324834	-3.87784	0.0207(0.0037-0.1172)	0.75	0.878049	0.818182	0.852981	-0.00497835	36	0.0112239	0.00973998	0.00338101	0.00736406	0.0216045	0.00878307	0.0129307	0.856104	0.000263861	41	0.0162023	0.0160361	0.00376856	0.0091466	0.0247197	0.0139601	0.0178695	0.9606	0.165077
TNC_1	0.219469	0.43137	-1.23842	0.158195	0.333966	-1.00191	0.224812	0.441872	-0.349474	0.7051(0.401-1.2397)	0.388889	0.878049	0.649351	0.594173	-0.00245398	36	0.0183183	0.0174154	0.00859313	0.00726584	0.042956	0.0119334	0.021228	0.918173	0.0111297	41	0.0207723	0.0179518	0.00876855	0.0112753	0.0593111	0.0156123	0.0233623	0.78767	3.03785e-06
TNC_2	0.788905	0.899352	0.268791	0.532206	0.740182	0.0808155	0.782901	0.892508	0.0790685	1.0823(0.6167-1.8993)	0.472222	0.756098	0.623377	0.542005	0.000500913	36	0.0188523	0.014661	0.00885891	0.00930401	0.0404284	0.011939	0.0242496	0.866734	0.000473525	41	0.0183514	0.0155042	0.00728077	0.0092481	0.041815	0.0140912	0.0201772	0.829838	2.48394e-05
TNIK_1	0.0708736	0.249837	-1.83678	0.0501879	0.150564	-1.64303	0.068775	0.243355	-2.10136	0.1223(0.0127-1.1756)	0.638889	0.634146	0.636364	0.630081	-0.00088617	36	0.00794857	0.00769921	0.00237231	0.00428954	0.0128823	0.00623987	0.00901597	0.95642	0.16638	41	0.00883474	0.00892174	0.00177027	0.00498284	0.0125906	0.00745825	0.0100728	0.984265	0.831632
TNIK_2	0.000761775	0.00789476	-3.52614	0.0010282	0.00651195	-3.08196	0.00182482	0.0189118	-7.19992	7e-04(0-0.069)	0.638889	0.804878	0.727273	0.71477	-0.000931332	36	0.00839825	0.00843021	0.0012583	0.00610478	0.0110236	0.00747183	0.00937122	0.982302	0.820114	41	0.00932959	0.00927673	0.00102809	0.00660805	0.0113924	0.00883904	0.010077	0.977089	0.567014
TNIK_3	NA	NA	NA	NA	NA	NA	NA	NA	NA	NA	NA	NA	NA	NA	NaN	0	NaN	NA	NA	Inf	-Inf	NA	NA	NA	NA	0	NaN	NA	NA	Inf	-Inf	NA	NA	NA	NA
TP63_	0.598107	0.757602	-0.529383	0.620488	0.785951	0.306762	0.595135	0.73745	-0.231302	0.7935(0.3381-1.8623)	0.666667	0.487805	0.571429	0.533198	-0.000641365	36	0.977515	0.977502	0.00508743	0.965991	0.986014	0.975137	0.981413	0.959409	0.206115	41	0.978156	0.977791	0.00554108	0.963717	0.992424	0.974736	0.981401	0.982725	0.777541
TPO_	0.885665	0.927615	0.144321	0.835173	0.933148	0.974809	0.882613	0.925379	0.00195664	1.002(0.9763-1.0283)	0.527778	0.609756	0.571429	0.514228	0.00581693	36	0.568616	0.610777	0.188413	0.174837	0.926282	0.42756	0.708788	0.973985	0.543903	41	0.562799	0.553175	0.161791	0.226449	0.809184	0.418803	0.703108	0.959946	0.156604
VDR_1	0.396145	0.602995	0.853465	0.373777	0.600149	-0.321866	0.392092	0.586683	0.178808	1.1958(0.794-1.8009)	0.5	0.707317	0.61039	0.559621	0.00215743	36	0.0269248	0.0262476	0.0108859	0.0105224	0.0509739	0.0177138	0.0364843	0.93445	0.0342179	41	0.0247673	0.0209671	0.0112707	0.0113663	0.0493008	0.0160251	0.0311796	0.879279	0.000428533
VDR_2	0.0179366	0.092944	-2.42317	0.011278	0.0459176	-2.28087	0.0231089	0.119746	-5.31063	0.0049(1e-04-0.4826)	0.638889	0.707317	0.675325	0.667344	-0.000612837	36	0.00794122	0.00783666	0.00116036	0.00450149	0.0108215	0.00737083	0.00858752	0.944833	0.0719352	41	0.00855406	0.00855925	0.00104355	0.00619846	0.0106738	0.00788506	0.00948399	0.97599	0.527941

## Sheet: ReadMe
Header	Annotation
Target/Gene	Fragment name/gene name
Position/Haplotype	Position of methyl site on fragment/haplotype
Type	Methylation type
P-value(Ttest)	The pvalue value of the T-test requires the data to conform to the normal distribution
FDR P-value(Ttest)	T-test FDR correction
t-value(Ttest)	The t-value of the t-test statistic requires that the data conform to a normal distribution
P-value(Utest)	The pvalue of the Wilcoxon (aka Mann-Whitney) rank sum test, which does not require the data to conform to a normal distribution
FDR P-value(Utest)	the Wilcoxon (aka Mann-Whitney) rank sum test FDR correction
Z-value(Utest)	The Z value of the Wilcoxon (aka Mann-Whitney) rank sum test, which does not require the data to conform to a normal distribution
P-value(Logistic)	logistic regression pvalue
FDR P-value(Logistic)	Logistic regression FDR correction
Estimate(Logistic)	logistic regression coefficients
OR(L95-U95)(Logistic)	Logistic regression OR value with 95% confidence interval
Sensitivity(Logistic)	AUC analysis sensitivity value
Specificity(Logistic)	AUC analysis specificity value
Accuracy(Logistic)	AUC analysis accuracy value
AUC(Logistic)	AUC analysis area value
GroupDiff	The mean difference of the data between the two groups = the mean of the case group - the mean of the control group.
Case/Control_Count	Number of samples in Case/Control group Note: Case and Control are example names, please refer to the actual group name. The group name in the front of the excel sheet is the case group, and the group name in the back is the control group.
Case/Control_Mean	Case/Control group sample methylation mean
Case/Control_Median	Case/Control group sample methylation median
Case/Control_StdDev	Case/Control group sample methylation standard deviation
Case/Control_Min	Case/Control group sample methylation minimum
Case/Control_Max	Case/Control group sample methylation maximum
Case/Control_Quantile_25%	Case/Control group sample methylation 25% quantile
Case/Control_Quantile_75%	Case/Control group sample methylation 75% quantile
Case/Control_Shapiro-Wilk_Wvalue	Case/Control group samples were tested by Shapiro-Wilk's normality test. The larger the value of Wvalue (closer to 1), and the less significant the Pvalue, the data is considered to conform to a normal distribution. Data volume requirements 3~5000
Case/Control_Shapiro-Wilk_Pvalue	Case/Control group samples were tested by Shapiro-Wilk's normality test. The larger the value of Wvalue (closer to 1), and the less significant the Pvalue, the data is considered to conform to a normal distribution. Data volume requirements 3~5000
