# Supplementary material for: Preliminary Study on the Sequencing of Whole Genomic Methylation and Transcriptome-Related Genes in Thyroid Carcinoma
Source: Cancers (Basel). 2022 Feb 24;14(5):1163. doi: 10.3390/cancers14051163 (PMC8909391; doi:10.3390/cancers14051163)
Supplement: Supplementary file 1 [file cancers-14-01163-s001.zip › Supplementary Table S5.xlsx]

## Sheet: Case.VS.Control
Gene	P-value(Ttest)	FDR P-value(Ttest)	t-value(Ttest)	P-value(Utest)	FDR P-value(Utest)	Z-value(Utest)	P-value(Logistic)	FDR P-value(Logistic)	Estimate(Logistic)	OR(L95-U95)(Logistic)	Sensitivity(Logistic)	Specificity(Logistic)	Accuracy(Logistic)	AUC(Logistic)	GroupDiff	Case_Count	Case_Mean	Case_Median	Case_StdDev	Case_Min	Case_Max	Case_Quantile_25%	Case_Quantile_75%	Case_Shapiro-Wilk_Wvalue	Case_Shapiro-Wilk_Pvalue	Control_Count	Control_Mean	Control_Median	Control_StdDev	Control_Min	Control_Max	Control_Quantile_25%	Control_Quantile_75%	Control_Shapiro-Wilk_Wvalue	Control_Shapiro-Wilk_Pvalue
ABTB2	7.16973e-07	1.93583e-05	-5.414	3.46579e-07	9.35763e-06	-4.96327	5.02593e-05	0.001357	-11.9938	0(0-0.002)	0.694444	0.853659	0.779221	0.822493	-0.00122022	36	0.00905554	0.00893062	0.000952363	0.00739773	0.0116152	0.00831033	0.00976887	0.973448	0.526924	41	0.0102758	0.0102341	0.00102456	0.00720525	0.0118518	0.00985482	0.0110934	0.934776	0.0208679
ADRA1B	0.227821	0.43937	-1.21598	0.292471	0.493545	-0.54618	0.233036	0.449426	-1.5135	0.2201(0.0183-2.6484)	0.277778	0.878049	0.597403	0.570461	-0.000512893	36	0.0108429	0.0110342	0.00167148	0.00735549	0.013632	0.00947727	0.0121753	0.974936	0.574628	41	0.0113558	0.0113261	0.00202792	0.00727936	0.0172964	0.0101165	0.012624	0.977409	0.578663
ALK	0.44786	0.647588	0.764702	0.764598	0.878474	0.721171	0.430796	0.637814	0.114549	1.1214(0.8433-1.4911)	0.333333	0.853659	0.61039	0.520325	0.00296041	36	0.0352833	0.0267578	0.0206606	0.0139944	0.118525	0.0211257	0.0411228	0.795749	1.34241e-05	41	0.0323229	0.0290943	0.0113281	0.016161	0.066524	0.025057	0.0366336	0.898136	0.00146154
ATP10A	0.198077	0.396155	1.31145	0.601006	0.779217	0.255951	0.139392	0.301124	0.326841	1.3866(0.8989-2.1388)	0.388889	0.853659	0.636364	0.53523	0.0156772	36	0.0340296	0.0164909	0.0713649	0.00945854	0.441792	0.0122722	0.0304745	0.300965	6.37804e-12	41	0.0183523	0.0159705	0.00765977	0.0105474	0.0413492	0.0135235	0.0204879	0.812597	1.01966e-05
BHLHE40	0.0762341	0.216665	1.80198	0.0714108	0.183628	-1.46536	0.0751054	0.213458	2.26777	9.6579(0.7949-117.3456)	0.611111	0.634146	0.623377	0.619919	0.000794518	36	0.0092599	0.00905196	0.00216509	0.00438612	0.0139527	0.00794856	0.0105721	0.991353	0.992098	41	0.00846538	0.00845652	0.00162232	0.00431916	0.0116437	0.00729973	0.00953417	0.978544	0.620618
C8orf44-SGK3	0.0594174	0.200534	1.91956	0.0344772	0.109516	-1.81872	0.0599257	0.202249	0.708398	2.0307(0.9708-4.2479)	0.388889	0.902439	0.662338	0.640244	0.00295293	36	0.309911	0.310553	0.00761272	0.286857	0.320465	0.305299	0.31555	0.93283	0.0305204	41	0.306958	0.307949	0.00556986	0.29316	0.32	0.303593	0.310105	0.967888	0.293658
CDH13	0.0692481	0.207744	1.84528	0.0489822	0.146947	-1.6548	0.0707375	0.212212	0.231753	1.2608(0.9806-1.6211)	0.694444	0.585366	0.636364	0.630759	0.00791879	36	0.0408362	0.035082	0.0200297	0.0193112	0.0996864	0.0227999	0.0579288	0.884565	0.00132597	41	0.0329174	0.0247254	0.0172667	0.0154678	0.0758505	0.0205875	0.0420903	0.807059	7.7337e-06
CDH16	0.00610335	0.047083	2.82475	0.00856112	0.0378377	-2.38407	0.0104937	0.0744379	0.217494	1.243(1.0522-1.4682)	0.527778	0.780488	0.662338	0.673442	0.0227914	36	0.864	0.865653	0.036078	0.786856	0.966234	0.842683	0.883834	0.984375	0.880271	41	0.841209	0.846849	0.0344484	0.688142	0.886753	0.821073	0.86274	0.822218	1.66625e-05
CHST2	0.00205717	0.0222174	-3.19582	9.20175e-05	0.000993789	-3.73998	0.00412884	0.0445915	-3.65945	0.0257(0.0021-0.3139)	0.888889	0.585366	0.727273	0.753388	-0.00156	36	0.0124937	0.0121305	0.00215501	0.00937067	0.0213587	0.0112056	0.0135428	0.843755	0.00013715	41	0.0140537	0.014531	0.0021167	0.00831217	0.0181414	0.0126722	0.0153686	0.970092	0.347201
COL26A1	0.0535695	0.19285	1.98242	0.161244	0.316935	-0.989359	0.0579743	0.202249	0.492371	1.6362(0.9835-2.7221)	0.444444	0.829268	0.649351	0.593496	0.00612255	36	0.0307084	0.0268622	0.0173332	0.0120202	0.109108	0.0208512	0.0349889	0.72246	6.49797e-07	41	0.0245859	0.0227647	0.00699325	0.0153698	0.0449076	0.0205874	0.0268098	0.868167	0.000216381
DPP4	0.000165318	0.00297573	-4.01068	9.41414e-07	1.69454e-05	-4.76561	0.000612785	0.0110301	-3.71468	0.0244(0.0029-0.204)	0.805556	0.780488	0.792208	0.811653	-0.00265314	36	0.0113557	0.0105566	0.00330894	0.0047412	0.0239095	0.00943643	0.0121967	0.828346	6.27539e-05	41	0.0140088	0.013743	0.00233926	0.00936098	0.0202785	0.0124519	0.0154153	0.985267	0.864199
DRAXIN	0.371372	0.6077	0.903371	0.733805	0.878474	0.624361	0.368425	0.602878	0.142021	1.1526(0.8458-1.5707)	0.222222	0.926829	0.597403	0.523035	0.00373166	36	0.0503983	0.0471531	0.0234878	0.02006	0.168156	0.0380747	0.0549902	0.65264	5.51026e-08	41	0.0466666	0.045991	0.00844474	0.0284248	0.0686935	0.0406093	0.051356	0.976768	0.555463
DUSP6	4.96102e-09	2.67895e-07	-6.64483	7.85129e-09	4.2397e-07	-5.6537	1.75328e-05	0.000946772	-2.23167	0.1073(0.0388-0.2973)	0.861111	0.707317	0.779221	0.859079	-0.0109188	36	0.0233731	0.0230827	0.00743431	0.00823961	0.0399336	0.0183471	0.028254	0.988791	0.969311	41	0.034292	0.0346727	0.0069109	0.019648	0.048521	0.0291499	0.038892	0.98356	0.807388
E2F1	0.467702	0.647588	-0.730071	0.538904	0.73662	0.097674	0.460643	0.637814	-2.62794	0.0722(1e-04-77.7438)	0.611111	0.585366	0.597403	0.541328	-0.000109194	36	0.00958223	0.00956102	0.000672204	0.00810616	0.0108011	0.00923137	0.0101687	0.977789	0.67034	41	0.00969142	0.00978126	0.000634479	0.00841273	0.0110323	0.00915968	0.0100831	0.970968	0.370609
FAM178B	0.744614	0.864851	-0.326959	0.164337	0.316935	-0.976789	0.741918	0.858383	-0.051714	0.9496(0.698-1.2918)	0.666667	0.560976	0.61039	0.592818	-0.00109677	36	0.933708	0.934194	0.0142631	0.888339	0.966426	0.925723	0.939648	0.93584	0.0377576	41	0.934805	0.938511	0.0151544	0.886756	0.95471	0.930469	0.945161	0.819148	1.42235e-05
GABBR2	0.903292	0.938034	-0.121958	0.703429	0.863299	0.534288	0.900423	0.935055	-0.0199368	0.9803(0.7173-1.3396)	0.5	0.707317	0.61039	0.474255	-0.000410085	36	0.0434099	0.0425492	0.0159781	0.0187627	0.0806916	0.0307673	0.0554959	0.952982	0.1298	41	0.04382	0.0385927	0.0131457	0.0267587	0.0767419	0.0348314	0.0498159	0.869795	0.000238753
GALNT7	0.963578	0.963578	0.045835	0.947402	0.947402	1.62017	0.962426	0.962426	0.223405	1.2503(1e-04-13606.7708)	0.611111	0.536585	0.571429	0.504743	5.18225e-06	36	0.00795425	0.00799789	0.000542286	0.00690256	0.00934272	0.00759234	0.008286	0.978776	0.703974	41	0.00794906	0.00788813	0.000434967	0.00696968	0.00880606	0.0077069	0.00824654	0.984319	0.833475
GALNTL6	0.00815062	0.0550167	2.72465	0.00392263	0.0211822	-2.65866	0.0110278	0.0744379	0.215209	1.2401(1.0505-1.464)	0.777778	0.609756	0.688312	0.689702	0.0185598	36	0.0671155	0.0632653	0.03204	0.0143575	0.146504	0.0445873	0.0841534	0.950322	0.107045	41	0.0485556	0.0372566	0.0270796	0.0151258	0.111197	0.0311418	0.0605506	0.843956	5.33994e-05
GAP43	0.171018	0.379289	1.39634	0.0607439	0.164009	-1.54856	0.0895974	0.230393	0.261455	1.2988(0.9604-1.7565)	0.611111	0.707317	0.662338	0.624661	0.0209813	36	0.0720147	0.0565534	0.0891296	0.027162	0.582303	0.0440686	0.0675375	0.311155	7.88285e-12	41	0.0510335	0.0474418	0.0144707	0.0315328	0.0918265	0.0409655	0.0571398	0.904776	0.00230099
GRM5	0.01783	0.0962819	2.4509	0.0102985	0.0397226	-2.31529	0.0196649	0.10619	0.129239	1.138(1.0209-1.2685)	0.722222	0.585366	0.649351	0.669377	0.0356702	36	0.133007	0.113287	0.0793213	0.0445693	0.484594	0.0837767	0.149036	0.73943	1.25148e-06	41	0.0973365	0.0859219	0.0389713	0.048881	0.189035	0.0700349	0.123345	0.889103	0.000803065
HTR7	0.00381578	0.034342	3.02595	0.00910908	0.0378377	-2.36115	0.00604472	0.0544024	0.252226	1.2869(1.0748-1.5408)	0.583333	0.731707	0.662338	0.672087	0.0222006	36	0.111789	0.103973	0.0390489	0.0553014	0.221225	0.0832948	0.12912	0.921146	0.0136039	41	0.0895879	0.0858032	0.0216873	0.0552104	0.135425	0.0743723	0.102158	0.94303	0.0399741
ITGA2	0.0262307	0.118038	-2.34314	0.0197253	0.066573	-2.05945	0.0368926	0.166017	-0.847761	0.4284(0.1932-0.9497)	0.5625	0.933333	0.741935	0.745833	-0.0083974	16	0.00766807	0.0041521	0.00993474	0	0.0320513	0	0.0104396	0.776207	0.00133844	15	0.0160655	0.0128205	0.0100063	0	0.027972	0.00833333	0.0277223	0.871516	0.0355173
KIAA1549L	0.0669036	0.207744	-1.86119	0.0565902	0.160835	-1.58406	0.069006	0.212212	-0.119695	0.8872(0.7798-1.0094)	0.694444	0.560976	0.623377	0.626694	-0.0156127	36	0.894658	0.901251	0.0388782	0.785556	0.966666	0.866015	0.924335	0.971949	0.481127	41	0.910271	0.920488	0.0341121	0.830371	0.95876	0.893814	0.933332	0.911788	0.00376486
KRT19	0.121622	0.298528	1.56937	0.180466	0.33604	-0.913592	0.11936	0.286777	0.176856	1.1935(0.9553-1.491)	0.444444	0.756098	0.61039	0.589431	0.00780649	36	0.0444617	0.0352934	0.0248153	0.0175839	0.115002	0.0258012	0.0515599	0.858375	0.000298464	41	0.0366552	0.0304051	0.0176962	0.0167792	0.081344	0.02403	0.0438943	0.851679	8.24083e-05
LIPH	0.521729	0.704334	-0.645134	0.875995	0.925288	1.1552	0.511003	0.689855	-0.0452832	0.9557(0.835-1.0939)	0.5	0.625	0.565789	0.510764	-0.00544373	36	0.926038	0.939881	0.0454994	0.700952	0.969716	0.912164	0.949085	0.650165	5.07876e-08	40	0.931481	0.935649	0.0234067	0.872449	0.973214	0.920614	0.948114	0.964555	0.238958
LRP4	0.83794	0.938034	-0.205251	0.545645	0.73662	0.114665	0.835624	0.935055	-0.175425	0.8391(0.16-4.4002)	0.75	0.487805	0.61039	0.54065	-0.0001289	36	0.0101985	0.00955085	0.00272724	0.0067409	0.0205263	0.00860844	0.0105369	0.807451	2.29768e-05	41	0.0103274	0.0103133	0.00277479	0.00627115	0.0228471	0.00839304	0.0114244	0.821557	1.61028e-05
MATN2	0.183093	0.38027	1.34548	0.0931837	0.228724	-1.3214	0.181507	0.363014	0.343847	1.4104(0.8517-2.3355)	0.777778	0.439024	0.597403	0.611789	0.00293258	36	0.0189253	0.0144812	0.0105768	0.00963899	0.053271	0.012013	0.0229182	0.779622	6.57554e-06	41	0.0159927	0.0125841	0.00820769	0.0085643	0.0420881	0.0106544	0.018093	0.774054	1.62204e-06
MCF2L2	0.444987	0.647588	0.767977	0.00354112	0.0211822	-2.69295	0.458465	0.637814	0.0397699	1.0406(0.9367-1.1559)	0.805556	0.512195	0.649351	0.691734	0.00895253	36	0.30569	0.314654	0.0520984	0.00804745	0.337393	0.308618	0.321337	0.323113	1.01357e-11	41	0.296738	0.30754	0.0498033	0.00915263	0.323323	0.299714	0.314255	0.386648	6.92637e-12
MET	0.319071	0.538432	1.00353	0.891018	0.925288	1.23196	0.311774	0.526118	0.717942	2.0502(0.5101-8.2408)	0.833333	0.317073	0.558442	0.490515	0.000764501	36	0.0117849	0.0107515	0.00354925	0.00593594	0.0209046	0.00917572	0.0131123	0.913293	0.00804103	41	0.0110204	0.0108997	0.00307372	0.00432432	0.017667	0.00955271	0.0135092	0.972442	0.412794
NELL2	0.627021	0.769526	0.487966	0.492908	0.719379	-0.0177783	0.62221	0.763621	0.136823	1.1466(0.6653-1.976)	0.583333	0.585366	0.584416	0.54607	0.000928624	36	0.0226278	0.0215275	0.00831856	0.0103038	0.0446197	0.0161746	0.027127	0.941244	0.0555404	41	0.0216992	0.0197349	0.00834723	0.0119403	0.0447265	0.0151741	0.0263247	0.870679	0.000251912
NPC2	0.726271	0.864851	-0.35143	0.373777	0.593646	-0.321866	0.726912	0.858383	-1.24128	0.289(3e-04-306.4577)	0.666667	0.609756	0.636364	0.559621	-5.14369e-05	36	0.00913722	0.0090244	0.000552292	0.00831428	0.0109149	0.00879349	0.00939731	0.930238	0.0254473	41	0.00918866	0.00928207	0.000728652	0.00742581	0.0105474	0.00877136	0.00975712	0.968348	0.304225
NRCAM	0.309624	0.538432	-1.02394	0.101512	0.238332	-1.27299	0.303508	0.526118	-0.7225	0.4855(0.1226-1.9228)	0.361111	0.902439	0.649351	0.609079	-0.000833686	36	0.0162158	0.0157322	0.00395381	0.0118684	0.0318105	0.0139511	0.0174013	0.763035	3.25174e-06	41	0.0170495	0.0161979	0.00306199	0.0116621	0.0265285	0.0152604	0.018604	0.913311	0.0041976
NRP2	0.175597	0.379289	1.36834	0.204956	0.363438	-0.82405	0.173575	0.360502	0.215448	1.2404(0.9095-1.6918)	0.75	0.463415	0.597403	0.584688	0.0047376	36	0.0466752	0.0462196	0.0161336	0.0141997	0.093564	0.0384798	0.0527294	0.954577	0.145681	41	0.0419376	0.0408758	0.0139659	0.0174419	0.0823591	0.0314434	0.0507782	0.955398	0.108389
PRR15	0.467115	0.647588	0.732627	0.803608	0.898085	0.854578	0.450446	0.637814	0.0786886	1.0819(0.8819-1.3272)	0.472222	0.707317	0.597403	0.516938	0.00400423	36	0.0628351	0.0610753	0.02942	0.015961	0.187924	0.0457446	0.0751866	0.828025	6.17658e-05	41	0.0588309	0.0600394	0.0154603	0.0203647	0.0891563	0.0517067	0.0675858	0.933494	0.018893
RAB27A	0.249989	0.44998	1.15939	0.20864	0.363438	-0.811148	0.253768	0.472534	4.54925	94.5612(0.0382-233803.3132)	0.833333	0.414634	0.61039	0.584011	0.000154102	36	0.00855483	0.00856824	0.000526367	0.00736183	0.00969707	0.00824109	0.00889476	0.979554	0.730398	41	0.00840073	0.00827735	0.000639371	0.00711721	0.00988041	0.00802551	0.00884807	0.984277	0.832055
RASD2	0.392234	0.62296	-0.86062	0.135336	0.292325	-1.10152	0.393294	0.624643	-0.5306	0.5883(0.174-1.989)	0.333333	0.95122	0.662338	0.599593	-0.000777	36	0.0159417	0.0149975	0.00394344	0.010995	0.0288387	0.013551	0.0165705	0.834159	8.39193e-05	41	0.0167187	0.0153402	0.00396349	0.0127283	0.0351269	0.0148206	0.0170216	0.65912	1.68122e-08
RFX8	0.886931	0.938034	0.142693	0.814929	0.898085	0.896208	0.884792	0.935055	0.0178254	1.018(0.7999-1.2956)	0.583333	0.625	0.605263	0.515972	0.000621624	36	0.0258398	0.020775	0.0194423	0.00961538	0.120421	0.017003	0.0260072	0.597595	9.73626e-09	40	0.0252182	0.0218165	0.0184151	0.00782051	0.113491	0.016176	0.0271456	0.596872	2.83631e-09
RUNX1	0.890518	0.938034	-0.138157	0.939325	0.947402	1.54913	0.887517	0.935055	-0.0131406	0.9869(0.8226-1.1841)	0.444444	0.707317	0.584416	0.50542	-0.000795121	36	0.0774913	0.0759794	0.0270156	0.0298324	0.133135	0.0560837	0.0992042	0.974506	0.560621	41	0.0782864	0.0731957	0.0229523	0.0413334	0.148935	0.0633422	0.0956245	0.912938	0.00408694
RUNX2	0.935247	0.952893	0.0818201	2.04364e-06	2.75892e-05	-4.60689	0.929621	0.947161	0.0252194	1.0255(0.586-1.7948)	0.75	0.878049	0.818182	0.802846	0.000161263	36	0.0154547	0.0130564	0.0117696	0.0115989	0.0836799	0.0127225	0.0143151	0.241175	1.91942e-12	41	0.0152934	0.0155126	0.00122774	0.0118793	0.0172003	0.0147122	0.0161484	0.93774	0.0263046
SFTPB	0.439726	0.647588	-0.777168	0.326476	0.534234	-0.449664	0.430121	0.637814	-0.16425	0.8485(0.5642-1.2761)	0.611111	0.560976	0.584416	0.565718	-0.00202179	36	0.251953	0.25267	0.0122615	0.225887	0.292019	0.244834	0.258914	0.947517	0.0873532	41	0.253975	0.255374	0.0103077	0.229824	0.278612	0.247555	0.260038	0.984022	0.823392
SHC3	0.112526	0.289353	1.6191	0.449078	0.673617	-0.127991	0.122146	0.286777	0.164771	1.1791(0.9568-1.4531)	0.555556	0.707317	0.636364	0.550813	0.0109627	36	0.0633231	0.0537157	0.038155	0.0276087	0.222727	0.0380782	0.0680001	0.716503	5.19196e-07	41	0.0523604	0.0477781	0.0148872	0.03093	0.0947134	0.042827	0.0558971	0.872671	0.000284477
SHC4	0.140124	0.328986	1.49153	0.155189	0.316935	-1.01443	0.139409	0.301124	0.0453129	1.0464(0.9853-1.1112)	0.638889	0.634146	0.636364	0.594851	0.0260247	36	0.246841	0.255045	0.0774119	0.0857607	0.397153	0.180161	0.315608	0.966276	0.332707	41	0.220816	0.195556	0.0752143	0.121268	0.388787	0.166361	0.285778	0.892061	0.000974788
SLC1A5	0.0249742	0.118038	-2.29244	0.00232639	0.0157031	-2.83014	0.0286086	0.140442	-1.52848	0.2169(0.0552-0.8523)	0.638889	0.780488	0.714286	0.699864	-0.00196383	36	0.0148957	0.014496	0.00406348	0.00884654	0.0307789	0.0124949	0.0174093	0.885124	0.00137091	41	0.0168595	0.0175266	0.00335905	0.00980564	0.0239825	0.0155263	0.0185527	0.963835	0.213824
SLC25A21	0.0809004	0.218431	1.77542	0.124896	0.281016	-1.15085	0.0809803	0.218647	0.0994172	1.1045(0.9878-1.235)	0.416667	0.804878	0.623377	0.602304	0.0180395	36	0.0599618	0.0388206	0.0515896	0.00533333	0.223492	0.0187088	0.093407	0.859933	0.000324966	41	0.0419223	0.0313062	0.0346656	0.00363636	0.143478	0.0146602	0.0543043	0.842181	4.8408e-05
SPOCD1	0.00952368	0.0571421	2.66586	0.00664925	0.0326418	-2.47567	0.0127507	0.0765041	0.0744926	1.0773(1.016-1.1424)	0.75	0.658537	0.701299	0.678862	0.0522178	36	0.591304	0.600166	0.0908431	0.449819	0.898306	0.528749	0.634098	0.928387	0.0223688	41	0.539087	0.508474	0.0795733	0.415175	0.711763	0.482991	0.567188	0.865884	0.000188669
STAC	0.241037	0.448827	1.19031	0.749152	0.878474	0.671823	0.281794	0.507229	0.156651	1.1696(0.8793-1.5557)	0.361111	0.878049	0.636364	0.52168	0.00746506	36	0.0330025	0.0204853	0.0364867	0.0110389	0.226837	0.016789	0.0341393	0.49155	5.11658e-10	41	0.0255374	0.02132	0.00981987	0.0132166	0.0511879	0.0188071	0.0303341	0.831692	2.74114e-05
SYT1	0.607426	0.762814	0.515956	0.538904	0.73662	0.097674	0.609588	0.763621	0.0166273	1.0168(0.9539-1.0838)	0.583333	0.585366	0.584416	0.541328	0.00844198	36	0.55889	0.571852	0.0625381	0.27779	0.604321	0.559536	0.581025	0.468412	2.845e-10	41	0.550448	0.574651	0.0807582	0.324598	0.622125	0.563085	0.585653	0.582878	1.3668e-09
TFCP2L1	0.0534869	0.19285	1.96199	0.0195929	0.066573	-2.06223	0.0587197	0.202249	0.565406	1.7602(0.9794-3.1635)	0.777778	0.536585	0.649351	0.654472	0.00354671	36	0.0239292	0.0235623	0.00763646	0.0123291	0.0435066	0.0181637	0.0301924	0.96066	0.225265	41	0.0203824	0.017678	0.00821982	0.0109382	0.0380359	0.0147009	0.0231223	0.850108	7.5379e-05
TIAM1	0.0427248	0.177472	-2.07557	0.00139344	0.0107494	-2.99032	0.0424792	0.176452	-1.38642	0.25(0.0655-0.9541)	0.583333	0.926829	0.766234	0.70935	-0.00196081	36	0.0159651	0.0148891	0.00500422	0.00948981	0.0361535	0.0128567	0.0177105	0.835329	8.90304e-05	41	0.0179259	0.0170116	0.00284099	0.0106895	0.0246797	0.0160722	0.0199544	0.953851	0.0956007
TNC	0.752741	0.864851	-0.316258	0.407523	0.62875	-0.233921	0.747111	0.858383	-0.0952639	0.9091(0.5095-1.6222)	0.444444	0.804878	0.636364	0.555556	-0.000573593	36	0.0186581	0.0164136	0.00837305	0.00910858	0.0413475	0.0122793	0.0226461	0.895759	0.00261797	41	0.0192317	0.0165185	0.00741772	0.011567	0.0457339	0.0151157	0.0213264	0.799358	5.30361e-06
TNIK	0.000737804	0.00996035	-3.53248	0.0011982	0.0107494	-3.03613	0.00156693	0.0211535	-7.18031	8e-04(0-0.0653)	0.583333	0.853659	0.727273	0.71206	-0.000909302	36	0.0081789	0.00789555	0.00120702	0.00600791	0.010825	0.00725589	0.00907499	0.960848	0.228287	41	0.0090882	0.0090774	0.00102832	0.00695797	0.0109268	0.00844457	0.00985748	0.973966	0.459976
TP63	0.598107	0.762814	-0.529383	0.620488	0.779217	0.306762	0.595135	0.763621	-0.231302	0.7935(0.3381-1.8623)	0.666667	0.487805	0.571429	0.533198	-0.000641365	36	0.977515	0.977502	0.00508743	0.965991	0.986014	0.975137	0.981413	0.959409	0.206115	41	0.978156	0.977791	0.00554108	0.963717	0.992424	0.974736	0.981401	0.982725	0.777541
TPO	0.885665	0.938034	0.144321	0.835173	0.901986	0.974809	0.882613	0.935055	0.00195664	1.002(0.9763-1.0283)	0.527778	0.609756	0.571429	0.514228	0.00581693	36	0.568616	0.610777	0.188413	0.174837	0.926282	0.42756	0.708788	0.973985	0.543903	41	0.562799	0.553175	0.161791	0.226449	0.809184	0.418803	0.703108	0.959946	0.156604
VDR	0.588932	0.762814	0.542739	0.615228	0.779217	0.292971	0.584624	0.763621	0.252936	1.2878(0.52-3.1894)	0.5	0.682927	0.597403	0.533875	0.000618395	36	0.0163784	0.0157894	0.00489522	0.0090231	0.0277315	0.0123098	0.0201372	0.942111	0.0591128	41	0.01576	0.0140584	0.00509271	0.00909749	0.0273094	0.0119226	0.0178093	0.905961	0.00249819

## Sheet: ReadMe
Header	Annotation
Target/Gene	Fragment name/gene name
Position/Haplotype	Position of methyl site on fragment/haplotype
Type	Methylation type
P-value(Ttest)	The pvalue value of the T-test requires the data to conform to the normal distribution
FDR P-value(Ttest)	T-test FDR correction
t-value(Ttest)	The statistic t value of the T-test requires the data to conform to the normal distribution
P-value(Utest)	The pvalue of the Wilcoxon (aka Mann-Whitney) rank sum test, which does not require the data to conform to a normal distribution
FDR P-value(Utest)	the Wilcoxon (aka Mann-Whitney) rank sum test FDR correction
Z-value(Utest)	The Z value of the Wilcoxon (aka Mann-Whitney) rank sum test, which does not require the data to conform to a normal distribution
P-value(Logistic)	logistic regression pvalue
FDR P-value(Logistic)	Logistic regression FDR correction
Estimate(Logistic)	logistic regression coefficients
OR(L95-U95)(Logistic)	Logistic regression OR value with 95% confidence interval
Sensitivity(Logistic)	AUC analysis sensitivity value
Specificity(Logistic)	AUC analysis specificity value
Accuracy(Logistic)	AUC analysis accuracy value
AUC(Logistic)	AUC analysis area value
GroupDiff	The mean difference of the data between the two groups = the mean of the case group - the mean of the control group.
Case/Control_Count	Number of samples in Case/Control group Note: Case and Control are example names, please refer to the actual group name. The group name in the front of the excel sheet is the case group, and the group name in the back is the control group.
Case/Control_Mean	Case/Control group sample methylation mean
Case/Control_Median	Case/Control group sample methylation median
Case/Control_StdDev	Case/Control group sample methylation standard deviation
Case/Control_Min	Case/Control group sample methylation minimum
Case/Control_Max	Case/Control group sample methylation maximum
Case/Control_Quantile_25%	Case/Control group sample methylation 25% quantile
Case/Control_Quantile_75%	Case/Control group sample methylation 75% quantile
Case/Control_Shapiro-Wilk_Wvalue	Case/Control group samples were tested by Shapiro-Wilk's normality test. The larger the value of Wvalue (closer to 1), and the less significant the Pvalue, the data is considered to conform to a normal distribution. Data volume requirements 3~5000
Case/Control_Shapiro-Wilk_Pvalue	Case/Control group samples were tested by Shapiro-Wilk's normality test. The larger the value of Wvalue (closer to 1), and the less significant the Pvalue, the data is considered to conform to a normal distribution. Data volume requirements 3~5000
