# Supplementary material for: Preliminary Study on the Sequencing of Whole Genomic Methylation and Transcriptome-Related Genes in Thyroid Carcinoma
Source: Cancers (Basel). 2022 Feb 24;14(5):1163. doi: 10.3390/cancers14051163 (PMC8909391; doi:10.3390/cancers14051163)
Supplement: Supplementary file 1 [file cancers-14-01163-s001.zip › Supplementary Table S6.xlsx]

## Sheet: 汇总
target sample	target sample	SYT1	RUNX2	MCF2L2-2	NRP2	RASD2-2	SFTPB	MET	RFX8	SHC3	CDH13	DRAXIN	RAB27A	C8orf44 SGK3	HTR7-2	GABBR2	DPP4-2	BHLHE40	ATP10A	COL26A1-2	FAM178B	GRM5-2	LIPH	NRCAM	NELL2	RIN1	LRP4	VDR	TPO	TP63	TNIK	KRT19	GAP43	MATN2	E2F1	CDH16	ALK	ADRA1B-2	ABTB2-2	CHST2-2	NPC2	RPP15-3	RUNX1	SLC1A5	ITGA2	SHC4	STAC	SPOCD1-2	TFCP2L1
4N	4N	0.000504625	0.00240386	0.000278057	0.0195656	0.000796328	0.000544584	0.158609	0.000906826	0.00302616	0.025714	6.18789e-05	0.079262	0.00234584	0.000490706	0.00237677	0.00790612	0.0990596	0.00509801	0.000108055	0.000487281	6.19975e-05	0.000378997	0.0422519	0.198715	0.00154693	0.0148178	0.00276538	1.58336	0.00170205	0.0295289	0.0462871	0.00013966	0.688208	0.00147318	0.049765	0.000175061	0.000943169	0.00121948	0.0308607	1.26965	0.00411917	0.0127741	0.0036916	0.0145771	0.000548738	0.000626791	0.000295178	0.175881
10T	10T	0.0191051	0.0534908	0.00301239	0.260022	0.0277727	0.579838	0.19142	0.00435941	0.0243949	0.0402344	0.00227651	0.259098	0.00312769	0.0052144	0.0758397	0.106092	0.661147	0.0214229	0.00190559	0.00875723	0.000344966	0.103029	0.198641	0.129407	0.0133543	0.195081	0.0244162	0.787847	0.0438017	0.10985	0.392553	0.023429	0.113731	0.0198631	0.0273075	0.00332992	0.00173239	0.0287409	0.10517	3.50668	0.0548426	0.67386	0.0226054	0.203906	0.00113896	0.00564952	0.00209162	0.053672
10N	10N	0.00153498	0.017642	0.00182153	0.0574101	0.016759	0.016499	0.025727	0.00216989	0.00286118	0.0113291	8.59424e-05	0.118459	0.00302404	0.00562528	0.000365661	0.010571	0.183559	0.0107985	0.00131247	0.000946933	0.000144101	0.000269802	0.0205198	0.0315493	0.00311616	0.00631774	0.00998004	2.01683	0.00965502	0.0411248	0.0311595	0.000851571	0.223342	0.0257949	0.0678717	0.000299313	0.000570939	0.00683427	0.0395722	0.952044	0.0410421	0.187228	0.0119879	0.012782	0.00135809	0.000630607	0.000161943	0.117597
16N	16N	0.00158176	0.015281	0.000697742	0.0408114	0.00742946	0.0287977	0.0870615	0.000777517	0.0056404	0.0170567	0.000484516	0.105296	0.00144544	0.000252791	0.00282123	0.026892	0.15513	0.0126942	0.000341383	0.000840882	0.0467933	0.00584349	0.075366	0.112398	0.0032099	0.0179407	0.00464697	5.61898	0.00248303	0.0216051	0.210789	0.0103288	0.509583	0.00256058	0.129526	0.000310571	0.000931851	0.00817892	0.0372731	1.32449	0.0108436	0.0504417	0.00496023	0.0139966	0.000766853	0.000902756	0.00101287	0.184078
16T	16T	0.00181291	0.00755254	0.000745149	0.0382818	0.0183855	0.434113	0.27833	0.00159046	0.011203	0.039976	0.000580124	0.198614	0.00102935	0.000783659	0.0214196	0.243386	0.238297	0.0161214	0.00172552	0.00468584	0.000187466	0.0801359	0.159119	0.0620575	0.00300597	0.0378244	0.00515307	0.0776732	0.0065785	0.0655592	0.618453	0.00260521	0.0178584	0.00500395	0.000999944	0.00350072	0.000528416	0.0103467	0.0777499	3.39257	0.017401	0.197575	0.00620618	0.16314	0.000288766	0.00433662	0.00209632	0.00531543
35N	35N	0.00213683	0.00563332	0.000168525	0.0370358	0.00639016	0.460491	0.127293	0.00174927	0.00414342	0.00972494	0.000240312	0.0851367	0.00252545	0.000470808	0.00190032	0.00691741	0.152497	0.00662371	0.00092307	0.00040926	0.000104287	8.07439e-05	0.0547531	0.0305844	0.00540442	0.00992258	0.0109374	8.91564	0.00687146	0.0195412	0.0790004	0.00139462	0.565846	0.00439858	0.202737	0.00019838	0.000987289	0.00450261	0.0382613	1.16714	0.0024914	0.0809316	0.0250851	0.0136659	0.000419391	0.000906357	0.000819338	0.485009
36N	36N	0.00320169	0.0103913	0.000323242	0.0828216	0.0238691	0.094227	0.347077	0.00126267	0.00946551	0.0339119	0.000801126	0.211013	0.00208839	0.000785588	0.0285387	0.170552	0.150656	0.011355	0.000777441	0.00250213	6.50948e-05	0.0367392	0.0740193	0.270342	0.00583526	0.0918477	0.0099426	2.38612	0.0199893	0.0469365	0.216356	0.000676549	0.445731	0.00512759	0.0939694	0.00071577	0.00384652	0.00696203	0.0708368	2.7177	0.0229202	0.0563714	0.0168817	0.0259537	0.000783212	0.0012137	0.000268972	0.200502
4T	4T	0.00851891	0.0608453	0.00158534	0.243382	0.103305	0.733719	0.609735	0.00322975	0.0188209	0.0684593	0.0055234	0.280841	0.00287751	0.00144586	0.0567993	0.38605	0.739435	0.0201123	0.00174338	0.0185697	0.000173434	0.177402	0.23479	0.283088	0.0219101	0.493772	0.0176267	0.0296977	0.0119154	0.146322	0.460602	0.00146962	0.0873	0.00444345	0.00339484	0.00809534	0.00855763	0.0444367	0.0938823	8.40328	0.101391	0.267484	0.0383022	0.0384934	0.00170379	0.00705668	0.001322	0.0238048
36T	36T	0.0046738	0.0214194	0.00063247	0.112704	0.0513927	0.124885	0.671486	0.00327139	0.0154809	0.0477437	0.00238982	0.445994	0.0016308	0.000723299	0.102994	0.507376	0.195035	0.0208576	0.00153633	0.00428001	1.71523e-05	0.145617	0.12829	0.910292	0.00830852	0.316207	0.015912	0.880644	0.037866	0.105504	0.198601	0.000583585	0.177571	0.0063785	0.0175459	0.00236639	0.0083458	0.00893674	0.133787	5.94771	0.0938509	0.099973	0.0947344	0.0282176	0.000732272	0.00099134	0.000204224	0.0544696
34N	34N	0.00106429	0.0213214	0.000923165	0.0275197	0.00921131	0.378982	0.0912202	0.00147406	0.0102452	0.0271528	0.000296054	0.145217	0.00143884	0.00177291	0.00490016	0.0460222	0.151128	0.0182063	0.000372986	0.00214919	0.000392323	0.00136682	0.0529545	0.0671071	0.0071551	0.00726661	0.0171164	1.61166	0.0110205	0.0509484	0.0982805	0.00416433	0.157685	0.0161895	0.0174295	6.04083e-05	0.000574975	0.0122836	0.0634641	2.18542	0.00892822	0.174959	0.0474312	0.0249623	0.00233968	0.00218974	0.000798567	0.117965
34T	34T	0.0029115	0.015042	0.000823721	0.0301211	0.0125868	1.00994	0.374793	0.00169801	0.00514485	0.00930739	0.000910872	0.159234	0.00132637	0.00251922	0.0189172	0.136436	0.232631	0.00988544	0.000551865	0.00379074	2.99475e-05	0.0388591	0.0701211	0.101561	0.00743672	0.0252307	0.0272838	1.08154	0.00735883	0.0345437	0.324651	0.00184886	0.13769	0.0104289	0.021943	0.000304906	0.00248159	0.0107295	0.094134	3.12933	0.00493481	0.251137	0.0418237	0.104192	0.00103283	0.00423798	0.00124471	0.114428
35T	35T	0.101378	0.00180551	0.000250275	0.00414453	0.00326088	2.80503e-05	0.0120064	0.000511608	0.00049471	0.00627197	0.00142658	0.00634895	0.000273214	0.00133856	0.00488933	0.00270336	0.0645947	0.00148739	4.52369e-05	0.000339059	1.88711e-05	7.851e-05	0.0408729	0.00859435	0.0146445	0.00407259	0.00952478	0.000531902	0.317121	0.00503799	0.155437	0.000133717	0.00195647	0.00710143	9.86244e-06	3.24567e-05	0.000177587	0.00269195	0.0420561	0.102001	0.000990939	0.193897	0.00868401	0.00660816	5.14694e-05	0.000527423	0.00041864	0.0096097
32N	32N	0.000793124	0.0410203	0.0008679	0.0344998	0.00668322	0.415973	0.0697492	0.00104202	0.00142075	0.00482386	0.000645704	0.124913	0.00160224	0.00270572	0.00388002	0.0322618	0.283555	0.0127892	0.00199107	0.000464391	0.000111342	0.00101241	0.0556705	0.0324741	0.00357711	0.00422589	0.0284053	1.70112	0.00718758	0.0309442	0.0918047	0.00139074	0.131814	0.00738357	0.0239827	0.000113203	0.000640036	0.0109623	0.0912662	1.95282	0.00324677	0.158915	0.0589189	0.0232921	0.000624345	0.00119019	0.000780221	0.112703
33N	33N	0.000971991	0.0021934	0.000242004	0.0221864	0.00281399	0.0724389	0.0843014	0.000427472	0.00209672	0.0183232	0.000123024	0.0577237	0.000968906	0.00037654	0.00164167	0.00486084	0.0684311	0.0046726	0.000409578	0.000588805	0.000203365	0.000584305	0.019588	0.034644	0.0025693	0.00451533	0.00315837	2.5956	0.00156894	0.0115064	0.0661865	0.000246918	0.333055	0.00428242	0.0587953	3.29095e-05	0.000634719	0.00202029	0.0446435	0.903772	0.00132022	0.0197323	0.00547101	0.0195018	0.0002388	0.000274328	0.00170173	0.0772991
33T	33T	0.000212421	0.00473386	0.00103871	0.00788591	0.00199853	0.288608	0.0128714	0.000971888	0.000754872	0.015769	0.000691901	0.0118631	0.000270866	0.00109583	0.000320555	0.00796981	0.107678	0.00257131	0.00184092	0.00212711	6.6798e-05	0.00508307	0.00683908	0.00152609	0.0025333	0.00223696	0.00628552	0.0533173	0.00761531	0.00262438	0.0898736	0.0641911	0.00622686	0.012642	0.00520141	3.3797e-05	0.000250328	0.00239314	0.00818804	0.255919	0.00151429	0.0605689	0.0314839	0.0267231	0.000196983	0.00135315	0.00585509	0.00460835
29N	29N	0.00105266	0.0043829	0.000947906	0.0212256	0.00465288	0.00507207	0.067761	0.000270074	0.0138368	0.0213826	0.000217197	0.0504669	0.000843165	0.000505302	0.00262564	0.0100931	0.0662697	0.00677676	8.43282e-05	0.000318181	0.000164201	0.000375662	0.0125278	0.0176496	0.00298245	0.00919626	0.00705914	3.28668	0.00294759	0.0234166	0.0482133	0.000489784	0.212138	0.00112136	0.0292363	4.6173e-05	0.0009319	0.00546491	0.0298545	1.08472	0.00113547	0.0227226	0.0153812	0.00858852	0.000172575	0.000389324	0.000295398	0.133315
30N	30N	0.000957427	0.00281057	0.0001238	0.0549232	0.00498129	0.00399641	0.243101	0.00161645	0.00622817	0.0203878	0.000148889	0.0844534	0.00281298	0.000430707	0.000763035	0.0133855	0.202877	0.00647492	0.00022471	0.000525911	0.000101658	0.000811024	0.0130249	0.203452	0.00444667	0.013479	0.00596693	1.86444	0.00369555	0.0284935	0.0834702	0.000884568	1.06271	0.00217308	0.129538	0.000460143	0.00175356	0.00249626	0.0507895	1.45951	0.00326924	0.0354714	0.00739454	0.0310243	0.000344045	0.00124505	0.000374401	0.21327
30T	30T	0.00467754	0.0224317	0.000878241	0.125294	0.0538317	0.505843	0.496394	0.00242106	0.00525046	0.0472766	0.00171425	0.191845	0.00170468	0.00101331	0.0704361	0.150187	0.224778	0.0182119	0.000673867	0.00409806	0.000162702	0.0791912	0.0499802	0.338516	0.0137635	0.142583	0.0129804	0.844412	0.0212798	0.0449238	0.277414	0.0148052	0.531068	0.00824236	0.0668872	0.0018209	0.00384009	0.018695	0.152977	5.73117	0.0568503	0.183361	0.0253887	0.0777065	0.00168243	0.00473333	0.000933287	0.0718884
31N	31N	0.0034035	0.0118392	0.000756304	0.0294194	0.0225038	1.57131	0.515573	0.00133367	0.00901407	0.0185204	0.000752624	0.139046	0.00164643	0.000884152	0.00383843	0.381012	0.243832	0.00938563	0.0012046	0.00449775	0.000138512	0.0612265	0.0707459	0.145974	0.00708094	0.0314954	0.0238362	1.21894	0.00927146	0.0409209	0.49826	0.00345691	0.261187	0.00723073	0.0390277	0.00109578	0.00221671	0.0146128	0.066491	2.58829	0.00393291	0.154479	0.0617486	0.054739	0.00212552	0.00582809	0.00146281	0.0932508
31T	31T	0.000654267	0.00340574	0.000149955	0.0276962	0.00312875	0.0367075	0.131191	0.000585365	0.00545545	0.0160985	0.000223741	0.0546221	0.00128132	0.000876265	0.000399448	0.0121349	0.0623221	0.00648056	0.000162841	0.000319396	3.382e-05	0.000870229	0.023748	0.137494	0.00262146	0.0100162	0.00366632	2.81335	0.00439237	0.0206129	0.195153	0.000196007	0.480206	0.00148207	0.0761041	0.000262295	0.00142745	0.00332869	0.0482519	0.89196	0.00242154	0.023307	0.00856336	0.0108595	0.000706395	0.000260449	0.000310312	0.19852
32T	32T	0.00620107	0.021921	0.000709861	0.0190314	0.00991512	0.558416	0.272031	0.000924352	0.00401214	0.00984294	0.00225997	0.162221	0.00117769	0.00169206	0.02299	0.103592	0.217972	0.0107379	0.00129154	0.0034391	0.000325753	0.0418922	0.0702812	0.0745518	0.00506556	0.0306821	0.027714	1.41581	0.00559121	0.0265645	0.257442	0.00327577	0.117671	0.00661822	0.0190475	0.000366599	0.00158324	0.0148821	0.0816381	3.11125	0.00904507	0.173683	0.0405115	0.0931367	0.00150703	0.00302568	0.000701465	0.0808435
28N	28N	0.00197869	0.00756057	0.00131795	0.0167884	0.00441644	0.0981303	0.0745437	0.000513528	0.00241798	0.00669053	0.00065824	0.0909222	0.00126351	0.000742655	0.00114056	0.0309328	0.0842141	0.00487834	0.000220949	0.000473535	3.61664e-05	0.000941359	0.0126922	0.0253879	0.00285687	0.00508598	0.0132153	2.40419	0.00791886	0.0372809	0.0875359	0.000356303	0.203077	0.00510833	0.0512049	0.000223708	0.000391548	0.00464933	0.0326663	0.864342	0.000769592	0.0467594	0.0203957	0.0186497	0.00534746	0.000897751	7.26137e-05	0.130782
28T	28T	0.000831213	0.00512353	0.000310368	0.00621114	0.0030954	0.073951	0.0722387	0.000300153	0.00391315	0.0027983	0.000887735	0.0586483	0.000448011	0.000723668	0.00166478	0.0248067	0.097254	0.00238758	0.000355845	0.000695964	5.43113e-06	0.00203072	0.0145318	0.0159926	0.00237312	0.0043	0.00647004	1.15736	0.00354893	0.0189172	0.0412449	0.000244251	0.100749	0.00354999	0.02295	0.000229192	0.000338433	0.00378819	0.0190325	1.35101	0.000959288	0.0435308	0.0193899	0.00907788	0.00101029	0.000467218	0.000196751	0.0671092
29T	29T	0.0163089	0.0331826	0.000674191	0.0846594	0.0421696	2.54709	0.688341	0.00236142	0.0283503	0.0442645	0.0028939	0.212208	0.00104121	0.00114891	0.0872009	0.390507	0.264832	0.020563	0.00103142	0.00478594	0.000247587	0.0962559	0.156318	0.34187	0.0159609	0.165245	0.0232839	0.00890742	0.0080834	0.0440602	0.436182	0.18115	0.033028	0.00499181	0.000431166	0.00260549	0.00796072	0.0316453	0.192623	6.15829	0.0635685	0.277768	0.0463004	0.201193	0.00249832	0.0127732	0.00222837	0.00515949
T11 065N	T11 065N	0.000545235	0.00333118	0.000722729	0.0127374	0.00311792	0.216872	0.0591679	0.00127917	0.00453334	0.00478678	0.000786026	0.0880432	0.00119257	0.00151847	0.000248448	0.0178511	0.05592	0.00361412	6.71741e-05	0.00014541	3.91696e-05	0.00108593	0.0156364	0.0171277	0.00143844	0.000755251	0.00481587	0.792827	0.00181865	0.0146441	0.025712	0.00133353	0.157112	0.00460298	0.0858882	0.000350508	0.000153538	0.0019583	0.0224004	2.06516	0.00154608	0.0319317	0.0112107	0.0073501	0.00062539	0.000495865	0.000168336	0.0587854
T11 065T	T11 065T	0.00381356	0.014456	0.000361411	0.0646966	0.0302326	1.51229	0.478197	0.00104891	0.00500226	0.0211701	0.00144289	0.190266	0.000741247	0.00194861	0.0544567	0.131955	0.181982	0.00439389	0.000203291	0.00226509	0.000509156	0.0668249	0.185719	0.270455	0.00601386	0.0354771	0.0085705	0.0318512	0.00169947	0.0282775	0.485081	0.0897157	0.0205298	0.00411745	0.00291707	0.00282171	0.000799104	0.0185896	0.0712247	6.84068	0.0646297	0.0972122	0.0329994	0.140989	0.00136486	0.00697896	0.00506657	0.00776828
T11 083N	T11 083N	0.00103809	0.00278911	0.000259524	0.0234415	0.000792541	0.00654089	0.111831	0.00063795	0.00332953	0.00949966	5.96194e-05	0.0783359	0.00199391	0.000652669	0.000740069	0.0129677	0.0503345	0.00212875	0.00030754	0.000115517	4.56923e-05	0.00336787	0.00969285	0.0772662	0.00268411	0.00339475	0.0027362	1.74633	0.00165135	0.0102616	0.0464926	0.000332166	0.369229	0.00138229	0.0967533	0.000450992	0.000137585	0.000686847	0.024497	1.64909	0.00262339	0.00985412	0.00198346	0.0123533	0.00111972	0.000341535	0.00024682	0.087439
T11 083T	T11 083T	0.0183895	0.00975292	0.000659394	0.0737157	0.0179956	1.83329	0.881517	0.00124334	0.0117067	0.0105409	0.00158622	0.260674	0.00138166	0.000794792	0.0762168	0.291112	0.299175	0.00424877	0.000274345	0.00924248	0.000173966	0.174927	0.137985	0.155746	0.00898519	0.0475604	0.0100424	0.179406	0.0126682	0.0373233	0.581547	0.00917976	0.0544054	0.00595326	0.0103111	0.0010219	0.00185097	0.0118777	0.0700335	0.112735	0.000358325	0.124068	0.0159921	0.243763	0.000322766	0.00751445	0.002346	0.0149802
T11 084N	T11 084N	0.00175747	0.0254257	0.00120532	0.0238111	0.00287959	0.0375164	0.115698	0.00369927	0.00447037	0.0121902	#DIV/0!	0.190581	0.00407824	0.0059619	0.00131647	0.0648731	0.200437	0.00648771	0.00177898	0.000322099	0.000616597	0.0013708	0.0549931	0.101542	0.0098307	0.000735137	0.00654214	0.49488	0.00361808	0.0496415	0.0483006	0.012154	0.334182	0.0056142	0.0409293	0.000278987	0.000933379	0.0021848	0.0301696	1.9885	0.0161637	0.0914497	0.0123589	0.0233051	0.00103226	0.000163994	0.000389306	0.0341415
T11 084T	T11 084T	0.0116349	0.00381527	0.000862534	0.0340966	0.00403717	1.59094	0.731967	0.00215479	0.00892829	0.00447406	0.000826874	0.185552	0.00123599	0.00188481	0.0243188	0.332947	0.306982	0.00283311	0.000701309	0.00134332	0.000262614	0.106361	0.115263	0.0743408	0.00612349	0.0157785	0.00837923	0.428191	0.00479581	0.0299106	0.515584	0.00364997	0.166533	0.00919235	0.0175776	0.00138836	0.000779554	0.00700919	0.0416661	4.05253	0.00934021	0.110551	0.0134778	0.232143	0.00174941	0.00395459	0.00108762	0.0379947
T11 085N	T11 085N	0.00150952	0.00246883	0.000349269	0.0252046	0.00180565	0.0158168	0.199363	0.000494626	0.00425621	0.00728947	0.000593434	0.121259	0.00286492	0.0010421	0.000455097	0.0175895	0.0579196	0.00350273	0.00176628	0.00015878	0.000234771	0.000528641	0.0314983	0.0921723	0.00112723	0.00709874	0.00264676	0.907545	0.00158414	0.0207596	0.0621919	0.000492498	0.55037	0.0020614	0.063319	0.000375206	0.000169144	0.00195895	0.0273813	2.09839	0.00351141	0.0173238	0.00402548	0.0229346	0.000502657	0.000361159	0.000650894	0.0709276
T11 085T	T11 085T	0.00249645	0.0119405	0.000557171	0.0366827	0.00239978	0.0725088	0.343981	0.000543263	0.00503368	0.0110479	0.000591658	0.201197	0.00283865	0.000739816	0.0041246	0.0358336	0.0671515	0.00555947	0.000362789	0.00085601	#DIV/0!	0.0101807	0.0697155	0.115692	0.000945371	0.0152961	0.00340429	1.15533	0.00318109	0.043403	0.128284	0.000938946	0.859787	0.00236037	0.055082	0.000768708	0.00423192	0.0012546	0.0527163	1.5332	0.00542762	0.0253429	0.00517964	0.0479386	0.000489634	0.00057636	0.000342022	0.0850503
T11 107N	T11 107N	0.00352666	0.00413129	0.000826659	0.0367663	0.00169676	0.0101436	0.117644	0.00152673	0.0105943	0.038512	0.000100059	0.155851	0.00397737	0.00196813	0.000764336	0.0273632	0.0864485	0.00552967	0.00326971	0.000212634	0.000232414	0.00482324	0.0183995	0.0787965	0.00131358	0.00528353	0.00295554	2.2398	0.0034135	0.022148	0.0281001	0.000437004	0.681113	0.0028488	0.122968	0.00347293	0.000625557	0.002057	0.0264025	1.30464	0.00395757	0.0323889	0.00712393	0.0124434	0.000475988	0.000659491	0.00456355	0.0592414
27N	27N	0.000535288	0.0168186	0.00124527	0.0454807	0.00844686	0.112776	0.109352	0.00144318	0.00600954	0.0195706	0.000620673	0.19134	0.00172616	0.00338158	0.00084357	0.0291537	0.208188	0.0130116	0.00127171	0.000562699	0.000509157	0.000641601	0.0444064	0.0620255	0.00455167	0.0159243	0.0267658	1.0204	0.00652632	0.0344251	0.0331686	0.00112086	0.440037	0.00916901	0.0653702	0.000960193	0.000858194	0.0177666	0.0743557	1.87813	0.00825352	0.133868	0.0588072	0.0191554	0.00237856	0.00214199	0.000629627	0.128479
27T	27T	0.00510807	0.0142771	0.00227943	0.0537234	0.0113851	0.235485	0.268267	0.0011038	0.0117587	0.0381202	0.00214346	0.201821	0.00210027	0.00364757	0.0108793	0.136838	0.361327	0.0211408	0.00051983	0.00398586	0.000336922	0.0268932	0.0612341	0.0989526	0.00714576	0.039055	0.0380498	0.477933	0.00893275	0.0413039	0.150889	0.000918107	0.306573	0.0118519	0.0529119	0.00147393	0.00176719	0.0106731	0.11062	2.25653	0.0143955	0.272465	0.0815896	0.0779829	0.00141835	0.00501843	0.000683112	0.0614021
T11 107T	T11 107T	0.00751734	0.0251682	0.000554063	0.0481062	0.0180515	2.1429	1.05365	0.00227262	0.0274199	0.035228	0.00072325	0.295261	0.00274637	0.000721097	0.150849	0.563027	0.276143	0.0166385	0.000671311	0.0149764	0.000471801	0.116208	0.155882	0.355693	0.0077249	0.0660861	0.0077847	0.0127218	0.00289139	0.0337034	0.479698	0.00370776	0.0661057	0.0122138	0.00133671	0.000546766	0.00178229	0.00858411	0.0893229	7.69395	0.039027	0.106459	0.0314217	0.115695	0.000540979	0.00478935	0.000857439	0.00587837
T11 046N	T11 046N	0.00168573	0.0211232	0.000383691	0.0250944	0.00643815	0.0300187	0.16269	0.000525009	0.0103403	0.0244602	0.00135789	0.175115	0.00159856	0.00221238	0.00393037	0.0225801	0.0630184	0.00593195	0.000338566	0.000598022	0.000447899	0.00116481	0.172998	0.0815306	0.00154574	0.00936849	0.00392952	2.7009	0.00157107	0.0434876	0.0388468	0.00178949	0.800851	0.00302601	0.0863977	0.000479192	0.00128175	0.00185705	0.0338489	2.34751	0.0216481	0.0271574	0.0059672	0.024402	0.0013403	0.000319554	0.000184192	0.220631
T11 046T	T11 046T	0.0301145	0.0105937	0.0011237	0.0409812	0.0322	2.18841	1.01468	0.000796869	0.0209853	0.00540721	0.00428346	0.292176	0.00207047	0.00108293	0.0609514	0.398008	0.292168	0.00809995	0.000772983	0.00942816	0.000373155	0.201319	0.2126	0.112862	0.00586718	0.067754	0.0152472	0.00897292	0.00949195	0.0555354	0.803349	0.0194376	0.0136636	0.0140281	0.000720844	0.000959285	0.00109648	0.0273065	0.0636701	9.07883	0.0508848	0.159228	0.0171766	0.224157	0.000738556	0.00511015	0.00172016	0.00499095
T11 047N	T11 047N	0.00177761	0.00267972	6.7135e-05	0.0221782	0.00285345	0.00762954	0.265505	0.000403624	0.0104737	0.0185568	0.000489727	0.171969	0.00252635	0.000282132	0.00139332	0.0153707	0.0484965	0.007585	0.000252191	0.00162503	0.000235787	0.00180557	0.0432028	0.236065	0.00122122	0.00760408	0.00310604	3.13463	0.00460958	0.0279553	0.114228	0.00136794	0.968195	0.00176264	0.130871	0.000282766	0.00115755	0.00175787	0.0333891	2.86771	0.00940415	0.00940137	0.00367636	0.0375231	0.000831677	0.000316166	0.000909688	0.113189
T11 040N	T11 040N	0.00150436	0.00393518	0.000401188	0.0224002	0.0023793	0.026399	0.108436	0.000422197	0.00747503	0.010717	0.000712575	0.0803224	0.00243742	0.000650344	0.000476981	0.00989453	0.0377997	0.00307924	0.000340238	6.01386e-05	0.000316149	0.000417786	0.0404382	0.0534024	0.00184644	0.00134276	0.00314102	0.858925	0.00393545	0.0144877	0.0455172	0.00118281	0.407997	0.00370997	0.0933248	0.000115626	0.000420063	0.00180917	0.0244568	1.28506	0.00418433	0.0294474	0.0120274	0.0143591	0.000162684	0.000580694	0.000242766	0.147078
T11 040T	T11 040T	0.0198556	0.0213543	0.000713307	0.0637759	0.0200512	0.517759	1.00886	0.000945081	0.0179362	0.0126163	0.00351131	0.211648	0.00139099	0.00201185	0.0475203	0.18606	0.268126	0.00504454	0.000253164	0.0077874	0.000402243	0.116992	0.194927	0.134486	0.00756808	0.0348684	0.0120179	0.00268583	0.00336936	0.0284104	0.563803	0.00548725	0.0153766	0.01071	0.000419614	0.00330412	0.00123533	0.0144444	0.0529665	6.02438	0.0202631	0.111607	0.0279787	0.141813	0.000461817	0.00733457	0.0026679	0.00389504
T11 047T	T11 047T	0.0031925	0.0354369	0.00102591	0.131892	0.0260528	0.9574	0.934737	0.00210437	0.00495367	0.0346792	0.00175073	0.391438	0.00281537	0.00130586	0.218049	0.362923	0.212015	0.0170667	0.000683554	0.00965061	0.000896794	0.11636	0.283108	1.00464	0.00544401	0.216788	0.00907564	0.720849	0.0144399	0.0732284	0.334482	0.0173547	0.211692	0.00589166	0.0291918	0.00147536	0.00188616	0.0190512	0.154609	12.2391	0.115855	0.141154	0.0340757	0.186565	0.00230088	0.00704271	0.0015942	0.027401
T11 011T	T11 011T	0.0184623	0.0221758	0.00115731	0.0547698	0.0187533	2.54389	1.11025	0.000680563	0.0226494	0.0210615	0.000929773	0.339348	0.00356328	0.00288049	0.0124077	0.996062	0.22013	0.0102183	0.00161624	0.00313968	0.0001971	0.14855	0.299628	0.238973	0.00462926	0.0402243	0.00537369	0.00604533	0.010889	0.0704067	0.515265	0.00686859	0.0845172	0.011257	0.000734343	0.000557826	0.0026999	0.0098362	0.0463595	8.43017	0.0149604	0.151895	0.032297	0.246252	0.00404666	0.00969477	0.00160391	0.00545799
T11 041N	T11 041N	0.00412286	0.0105018	0.000402819	0.0257304	0.0058126	0.208664	0.324373	0.000678338	0.0111731	0.0375376	0.00553779	0.179131	0.00274444	0.00371616	0.0122541	0.24251	0.128934	0.00678073	0.000682519	0.00120604	0.000455427	0.0435528	0.079924	0.0731004	0.00317727	0.0170785	0.0103552	0.888583	0.03078	0.0319039	0.695399	0.00496533	0.145071	0.00262186	0.0423861	0.000785291	0.000476382	0.0043003	0.0218163	3.77725	0.0101698	0.104105	0.0100502	0.119689	0.000541837	0.00654508	0.00243072	0.046972
T11 041T	T11 041T	0.00753311	0.0127594	0.000109361	0.0363578	0.0169901	0.252246	1.03128	0.000967478	0.0215759	0.0319075	0.00226576	0.457238	0.00151002	0.000122253	0.0471415	0.731531	0.170485	0.02475	0.000692578	0.0106865	0.000373746	0.127783	0.254752	1.70473	0.00215029	0.166991	0.00288886	0.036537	0.016229	0.146495	0.29859	0.127809	0.0100501	0.00103055	0.000645035	0.00104623	0.00257268	0.00352745	0.103737	9.96253	0.16922	0.0508595	0.00438098	0.0494153	0.00611813	0.00388619	0.000421521	0.00337532
T11 005N	T11 005N	0.000537414	0.00433868	0.00023013	0.00464981	0.00194848	0.00405283	0.157908	0.000940421	0.00371604	0.0081055	0.00010124	0.0816555	0.00285889	0.000451045	0.000280016	0.00441936	0.0341717	0.00140215	0.000290901	0.000355421	#DIV/0!	0.000310315	0.0716693	0.0669626	0.000753389	0.012888	0.0030827	2.45547	0.00129994	0.013943	0.0370676	0.000379002	0.849795	0.00109479	0.108924	0.000989144	0.000348025	0.000372354	0.0155947	1.322	0.00587849	0.0065115	0.00177533	0.0132664	0.000251025	7.10512e-05	0.000544489	0.279092
T11 005T	T11 005T	9.06909e-05	0.00585848	0.000218707	0.0818289	0.0124029	0.00333412	0.297478	0.00116307	0.0127518	0.042054	0.00272042	0.198923	0.00109216	0.00056897	0.105002	0.0230752	0.252258	0.00891568	0.00340149	0.019798	4.66048e-05	0.0740672	0.297869	0.717361	0.000766717	0.13691	0.00517307	0.105814	0.0476444	0.0478822	0.278454	0.000550722	0.308721	0.00266666	0.00592895	0.00347926	0.000355753	0.00252338	0.102893	7.84569	0.241519	0.061181	0.0153268	0.492717	0.00244886	3.74654e-05	0.000196595	0.00421416
T11 007N	T11 007N	0.00103161	0.00508946	0.000645604	0.0257203	0.000886053	0.0482054	0.0995328	0.000460732	0.00307867	0.0109852	0.000182568	0.122195	0.000483989	0.000863983	0.000202113	0.0297674	0.037147	0.00577451	0.000647691	0.000238488	0.000258729	0.000754086	3 NRCAM	0.0221111	0.000832064	0.00415338	0.00176798	1.76014	0.00196062	0.0160981	0.0281191	0.000752348	0.200813	0.00159522	0.0923065	0.000231748	0.000523369	0.000465856	0.0117662	1.68169	0.00433736	0.0179027	0.0039091	0.012867	0.00241614	9.36705e-05	0.000284679	0.0565266
T11 007T	T11 007T	0.0131597	0.018932	0.00123759	0.0638853	0.0328373	1.02838	1.13937	0.00228509	0.0180873	0.013768	0.00108652	0.481559	0.00267182	0.00446984	0.0442906	0.402207	0.247499	0.00822576	0.0034851	0.00781301	0.000318897	0.131093	0.197999	0.158545	0.00650891	0.0712317	0.0122868	0.00425048	0.00837432	0.049705	0.349211	0.0187964	0.045798	0.00604141	0.000379235	0.00346841	0.00128143	0.0113755	0.0466435	6.64336	0.0341086	0.153375	0.0152409	0.301643	0.00160073	0.00579852	0.0018037	0.00940339
T11 009N	T11 009N	0.00177584	0.002405	0.00086393	0.0291308	0.118546	0.00230004	0.148331	0.00188486	0.00651627	0.0139188	0.00122073	0.0983189	0.00311194	0.000739666	0.000314797	0.00826205	0.0376188	0.00272046	0.00129367	0.000412519	0.00285735	0.000480231	0.0248916	0.0631052	0.0017613	0.00954571	0.00232826	T11 009N	0.00377977	0.0276039	0.0309337	0.000522617	0.852694	0.00479692	0.096861	0.000230679	0.0134123	0.000704846	0.048545	2.12993	0.00504295	0.0204021	0.00239973	0.018618	0.000278888	0.000242507	0.000230646	0.177778
T11 009T	T11 009T	0.00715454	0.0183306	0.00159165	0.107569	0.0203885	0.657923	0.829671	0.00210945	0.00654734	0.017743	0.00101167	0.333331	0.00285655	0.00094948	0.123974	0.371723	0.147868	0.0088585	0.00031017	0.00384633	0.000683138	0.10843	0.217131	0.17246	0.00695487	0.0638852	0.00648749	0.510999	0.0422285	0.038395	0.325969	0.0127028	0.207965	0.0049302	0.0200565	0.00159217	0.00446818	0.0107433	0.0734968	7.88008	0.104583	0.1028	0.00742256	0.147697	0.00305621	0.00317625	0.00146284	0.0290114
T10 276T	T10 276T	0.0274889	0.0154756	0.00125677	0.0324329	0.0182363	1.22548	0.764297	0.00240823	0.0256268	0.0163296	0.00139735	0.240606	0.001897	0.00184373	0.0389713	0.311789	0.189487	0.00910222	0.00141558	0.00487728	0.00107755	0.132196	0.167114	0.337206	0.00454757	0.0692175	0.010105	0.126923	0.0848369	0.0384418	0.653823	0.00671809	0.0523829	0.00684603	0.00374833	0.000858611	0.0024751	0.00687059	0.07408	6.47844	0.0499085	0.161424	0.0120717	0.262674	0.000366547	0.0033133	0.00116708	0.00816354
T10 288N	T10 288N	0.000208226	0.00525276	0.00130571	0.0159129	0.00429238	0.0678629	0.103951	0.00153819	0.0206154	0.00448411	0.000387916	0.204104	0.0063358	0.00284019	0.000799332	0.00521118	0.22295	0.00767683	0.00316115	0.00120901	0.000467606	0.000880782	0.0203599	0.146166	0.00480827	0.0130546	0.00480717	6.81266	0.0135491	0.0440106	0.0344528	0.0128013	1.62522	0.00399191	0.465469	0.00149189	0.0168302	0.0121659	0.0158634	1.20131	0.032774	0.0447768	0.00475969	0.00587851	0.00231394	0.000800362	0.0075732	0.522699
T10 288T	T10 288T	0.0194385	0.0321747	0.000862353	0.128482	0.0987883	0.56287	1.25607	0.00186785	0.0222996	0.0257124	0.00575273	0.458185	0.0026043	0.00107246	0.199234	0.458671	0.4535	0.0142867	0.000532852	0.0117382	0.000467046	0.255357	0.292006	0.563386	0.0106904	0.300755	0.0183074	0.00552426	0.00518337	0.108189	0.732815	0.0767533	0.0475092	0.00795231	0.000540852	0.00947464	0.00292762	0.0420867	0.193066	9.49292	0.134962	0.188909	0.0219103	0.296045	0.00178932	0.00610862	0.0018991	0.00295218
T10 250N	T10 250N	0.00215247	0.0023474	0.000450711	0.0196132	0.00509509	0.00332298	0.15532	0.00344895	0.00297475	0.0240287	0.000358418	0.0941441	0.00281102	0.00122553	0.00276255	0.0154355	0.0284784	0.00184377	0.000157497	0.000170865	5.43091e-05	0.00066428	0.0694047	0.0816511	0.00125978	0.00399995	0.00235856	1.96966	0.00166525	0.0421731	0.0535862	0.00149208	0.428792	0.00122903	0.0870391	0.000179963	0.000508151	0.000241981	0.0251768	1.19451	0.0048919	0.0110687	0.00118711	0.02358	0.000274468	0.0010812	0.000171922	0.164175
T10 250T	T10 250T	0.0106446	0.00563675	0.000280144	0.0356133	0.00693152	1.06323	0.350417	0.00095387	0.00944587	0.0195829	0.000948722	0.169168	0.00120388	0.000312209	0.0070051	0.146524	0.175483	0.00746764	0.000317952	0.00135439	0.000164443	0.0360904	0.0818257	0.0235822	0.00295209	0.0126086	0.00744875	2.23133	0.00140231	0.0340394	0.246353	0.0217113	0.148782	0.00240237	0.039287	0.000827088	0.00108268	0.0057622	0.0398052	2.43257	0.00501962	0.103126	0.0043703	0.282397	0.000741278	0.00631661	0.00171581	0.0475807
T10 267N	T10 267N	0.000858212	0.00432683	0.000272403	0.00956107	0.00477576	0.00140914	0.103528	0.00223358	0.00632884	0.00710888	0.000192472	0.113719	0.00315434	0.000254432	0.000380273	0.00701618	0.0378421	0.00384992	0.000323116	0.000300692	0.00019195	0.000907706	0.0276052	0.0368198	0.00113405	0.00457665	0.00171105	2.59944	0.00437914	0.0153393	0.0386495	0.00242108	0.836657	0.00200351	0.168039	0.000175097	0.000714528	0.00111802	0.013347	1.58532	0.00408252	0.0065713	0.00407263	0.0101559	0.000211301	0.000206126	0.000602721	0.0872909
T10 267T	T10 267T	0.0143024	0.0163463	0.00229831	0.0768234	0.0395294	2.61202	0.85986	0.00254449	0.0218802	0.00895142	0.00401501	0.871183	0.00183709	0.000904388	0.0729211	0.271069	0.640061	0.0102182	0.000816548	0.013381	0.000673704	0.184762	0.157156	0.451118	0.00804367	0.0847308	0.0165199	0.0126998	0.00294898	0.102023	0.874749	0.0255242	0.0618111	0.0131925	0.00153073	0.00439918	0.00362914	0.0356257	0.0776083	7.62129	0.132345	0.231815	0.0177866	0.205003	0.000215764	0.014147	0.00151208	0.0118663
T10 268N	T10 268N	0.00824005	0.00323272	0.00051681	0.0237075	0.00401733	0.0393622	0.536805	0.000916691	0.00642495	0.00474894	0.000483629	0.168179	0.0017071	0.000497638	0.0119268	0.0804958	0.0864094	0.00224557	0.000341692	0.00171521	0.000190775	0.0394578	0.104652	0.255915	0.0052799	0.0249962	0.00275248	1.8307	0.00274451	0.0282382	0.140205	0.00155407	0.741469	0.00272737	0.0710528	0.00064884	0.000872839	0.00145312	0.0353562	4.06108	0.0158686	0.0214388	0.00203687	0.0384937	0.000590304	0.00085427	0.00015526	0.0869872
T10 268T	T10 268T	0.021784	0.0101471	0.00223269	0.0586513	0.022466	0.874771	1.13758	0.00108426	0.0247535	0.00721754	0.00182695	0.449222	0.00308335	0.000903672	0.0353523	0.484978	0.274933	0.00641375	0.00200369	0.0105545	0.000250472	0.207303	0.167865	0.323603	0.00963886	0.204195	0.00921411	0.989774	0.0089594	0.127279	0.608263	0.00936702	0.291223	0.0131099	0.0457685	0.00541564	0.00480999	0.0151708	0.0934182	5.25917	0.0288067	0.121795	0.00670168	0.130391	0.00117123	0.00440802	0.000964847	0.0479703
T10 272N	T10 272N	0.00258065	0.00921012	0.000217582	0.0208278	0.00114345	0.0378708	0.225922	0.000778936	0.00590608	0.027545	0.000332425	0.136505	0.00158142	0.000188966	0.00212378	0.0401672	0.0334644	0.00688066	0.000176182	0.000225965	#DIV/0!	0.00952617	0.0923327	0.0835338	0.0037413	0.0122221	0.00237263	2.38947	0.00367413	0.0284943	0.126908	0.0219523	1.01926	0.0011792	0.105014	0.000189384	0.000776188	0.000815613	0.0218254	2.11856	0.0428812	0.0154274	0.00109806	0.0363717	0.000195782	0.00124795	0.000194312	0.148154
T10 272T	T10 272T	0.0107036	0.00537104	0.00035777	0.0404055	0.00681144	0.77708	0.512979	0.00174567	0.0510409	0.022464	0.000445308	0.197828	0.00204641	0.00138316	0.0294012	0.204672	0.0935249	0.00758336	0.000544557	0.00286107	0.00287533	0.0671186	0.120382	0.121042	0.00236723	0.0165632	0.00514326	1.60691	0.00476989	0.034654	0.272867	0.0199417	0.468055	0.00348432	0.0547392	0.000725944	0.000814962	0.00388705	0.0260731	4.08813	0.00538228	0.0871199	0.0063619	0.127389	0.00067251	0.00264852	0.000707715	0.138459
T10 276N	T10 276N	0.00198014	0.0148778	0.00015009	0.0374012	0.00415367	0.055896	0.224888	0.00191042	0.0175221	0.0176375	0.000318051	0.238256	0.00329842	0.000749598	0.00143668	0.0573888	0.174602	0.0089839	0.00164392	0.000765114	0.000150645	0.0136587	0.049463	0.180966	0.00922083	0.0164972	0.00363429	5.44871	0.00440671	0.0347027	0.219541	0.00097339	0.771468	0.00635456	0.0928535	0.000514965	0.00104457	0.00424262	0.0475205	2.69491	0.00487026	0.0600157	0.00450701	0.0549032	0.00309959	0.00122932	0.000297989	0.154808
T10 246T	T10 246T	0.0546474	0.0146995	0.000537366	0.0589099	0.0241715	0.626016	1.07653	0.000472839	0.0225591	0.0109841	0.00444911	0.288772	0.00140422	0.0016474	0.0887518	0.527712	0.237007	0.00391713	0.000807461	0.00738325	0.000286192	0.188043	0.299024	0.09213	0.00794536	0.0649667	0.0110027	0.00326529	0.00549975	0.0418602	0.640667	0.0241923	0.0221062	0.0131357	0.000386228	0.00254319	0.00256814	0.0206366	0.0985136	5.18239	0.0191913	0.1211	0.0108473	0.286089	0.00026193	0.00696582	0.000984439	0.00265722
T10 249N	T10 249N	0.00108648	0.00788693	0.000651086	0.015435	0.00492358	0.0109353	0.241392	0.00364652	0.0558298	0.0166432	0.000187442	0.114893	0.00407941	0.00093882	0.0014795	0.0163927	0.0425412	0.014371	0.00768744	0.000192584	0.0017901	0.00622613	0.0822411	0.143132	0.00958833	0.0312667	0.00642309	3.38506	0.00307643	0.0475263	0.0674176	0.00390511	1.14473	0.00476576	0.132409	0.00328027	0.00148137	0.00165937	0.0746802	3.16815	0.00870624	0.017105	0.00252797	0.0243299	0.000859988	0.000791615	0.00598812	0.250128
T10 249T	T10 249T	0.0320014	0.0183796	0.000659027	0.0744278	0.0166999	0.497847	0.914163	0.00653008	0.0138045	0.0110983	0.00557298	0.376261	0.00308996	0.00187088	0.0750956	0.230177	0.381354	0.00481934	0.00132317	0.0137271	0.00186999	0.201196	0.290863	0.428312	0.00880529	0.147465	0.00776556	0.00217056	0.0206275	0.070932	0.452484	0.00811115	0.0553161	0.0154124	0.000409087	0.00383037	0.00224449	0.0230857	0.0761601	12.7282	0.127137	0.159355	0.0101477	0.239687	0.00381614	0.00338155	0.00330967	0.00243956
T10 186T	T10 186T	0.0144132	0.0148749	0.00127407	0.0119913	0.0128612	1.05604	0.944257	0.0027066	0.00416189	0.013412	0.00198195	0.29732	0.000205508	0.00113075	0.124418	0.457938	0.214495	0.00676898	0.00080606	0.00490452	0.000530854	0.13264	0.22921	0.0927337	0.00344376	0.051389	0.00807326	0.122488	0.004503	0.05677	0.393632	0.0223158	0.0732318	0.0062845	0.00788299	0.00152798	0.00106944	0.00925333	0.0334971	2.3408	0.0303205	0.104703	0.0124459	0.256538	0.000459424	0.00336331	0.00226935	0.0126102
T10 191N	T10 191N	0.00137804	0.00137834	0.000127161	0.00248067	0.000789129	0.00231719	0.129407	0.000391589	0.00397534	0.0153048	5.3918e-05	0.105037	0.00140493	0.000106146	0.00215134	0.0137955	0.0212495	0.00258744	#DIV/0!	0.00015786	8.05118e-05	0.00191807	0.0110643	0.0775562	0.000440338	0.0108995	0.00173157	1.33927	0.00130931	0.0169591	0.0762574	0.00284852	0.322534	0.00199513	0.0348894	0.000502337	0.000689933	0.000935019	0.0228906	1.1456	0.00643826	0.00983737	0.00188428	0.0209108	0.00039445	0.000117892	0.000812208	0.0952319
T10 191T	T10 191T	0.0210276	0.021726	0.000986871	0.0579918	0.0391611	1.73437	0.798709	0.00120841	0.00981756	0.0342924	0.0019173	0.43421	0.000732536	0.00104646	0.122699	0.259283	0.214852	0.0113844	0.000554717	0.0047869	0.000672667	0.0511479	0.189809	0.13268	0.00771063	0.137264	0.0071127	0.47732	0.00481573	0.0585384	0.361751	0.0212705	0.169295	0.00501699	0.0183206	0.00456962	0.00359919	0.0175682	0.106083	4.86987	0.112457	0.103022	0.0150707	0.160112	0.00117639	0.00439548	0.00250548	0.029226
T10 192N	T10 192N	0.00216364	0.0612017	0.00134985	0.0078255	0.00894777	0.0297096	0.168171	0.00235871	0.0282854	0.00847504	0.00300033	0.195002	0.00203755	0.00264225	0.000568285	0.0442591	0.040476	0.00975003	0.000585302	0.000326082	0.000318648	0.00179603	0.159527	0.145155	0.00073465	0.0117188	0.00237843	2.20895	0.00641038	0.0332685	0.034469	0.0215748	0.508672	0.00565786	0.155606	0.00131131	0.000885454	0.000610255	0.0250612	2.45138	0.0628982	0.0404905	0.00923801	0.0127557	0.00345968	0.00106378	0.000296772	0.11921
T10 192T	T10 192T	0.00099415	0.0182097	0.0015574	0.0995624	0.0197632	0.0646728	0.514191	0.00155378	0.0036257	0.0106587	0.00260458	0.302533	0.00144169	0.000965233	0.0644345	0.033274	0.13366	0.00591143	0.000115757	0.007279	0.000113114	0.0486238	0.274262	0.383683	0.00655143	0.166226	0.00981468	0.185402	0.00203792	0.0529712	0.225909	0.0426547	0.0380094	0.00561671	0.00150297	0.00282801	0.0016707	0.00731166	0.128459	8.69588	0.181649	0.0581357	0.0134356	0.236569	0.00327532	0.00213779	0.00217647	0.00460841
T10 193N	T10 193N	0.00171083	0.0284257	0.00123386	0.0159136	0.00303654	0.0220185	0.206119	0.00207292	0.0181553	0.0067972	#DIV/0!	0.188025	0.00341257	0.00279777	0.00115386	0.0369326	0.0649284	0.0114741	0.000268446	0.000603248	0.000261169	0.00337527	0.0489889	0.173728	0.00160042	0.0218477	0.00417383	1.84792	0.00264643	0.0253594	0.0671799	0.00533308	0.676365	0.00422964	0.122325	0.000425546	0.00144866	0.00254241	0.0348876	3.87956	0.00196276	0.0342334	0.00555751	0.0279698	0.00397864	0.000321852	0.000679438	0.132928
T10 193T	T10 193T	0.0123964	0.0156028	0.00100496	0.0688535	0.0193354	0.616374	0.604874	0.0030255	0.00677241	0.0126745	0.00104777	0.195858	0.000727947	0.000821034	0.0131304	0.187826	0.279524	0.00883674	0.000320917	0.00420425	0.000485688	0.121561	0.095727	0.190228	0.00438253	0.0874434	0.0135974	0.196084	0.0032591	0.0504882	0.571727	0.010347	0.0273253	0.00290842	0.00243606	0.00125798	0.00294225	0.0135357	0.0694755	4.73749	0.0906698	0.165758	0.0136493	0.122975	0.00139845	0.0130671	0.00486706	0.00955031
T10 194N	T10 194N	0.00281003	0.0051175	0.000896455	0.0137831	0.00795115	0.0247813	0.119797	0.00134336	0.0122201	0.0227983	#DIV/0!	0.148196	0.00205123	0.00172062	0.000760428	0.0240823	0.045728	0.0063314	0.000321476	0.000302296	#DIV/0!	0.000354234	0.0256554	0.0976504	0.00192392	0.00232172	0.003719	1.38982	0.00240849	0.0319407	0.0390865	0.00188552	0.488448	0.00399527	0.124914	9.08034e-05	0.000903511	0.000999366	0.0173914	1.81942	0.0323864	0.0313038	0.00908842	0.0270566	0.000175203	0.000288827	0.00105081	0.1608
T10 194T	T10 194T	0.00554606	0.0286316	0.00100551	0.0873755	0.0383784	0.402459	0.471661	0.00263881	0.0124259	0.0304846	0.00234091	0.461409	0.00107162	0.000255192	0.0780738	0.135366	0.396612	0.00904908	0.000932418	0.026671	0.00029747	0.0640134	0.13554	0.780731	0.00704703	0.291946	0.0100018	0.0841011	0.0299061	0.115648	0.205689	0.0478676	0.109818	0.00389926	0.00352102	0.0096207	0.00571772	0.0263887	0.0389646	5.86716	0.320883	0.0528302	0.00839458	0.0433753	0.000882771	0.00269465	0.00362795	0.0187345
T10 195N	T10 195N	0.00193265	0.00921767	0.00246608	0.00664125	0.00991786	0.115965	0.0764138	0.000935857	0.00318357	0.00150745	0.000156434	0.153188	0.00193798	0.00138618	0.000423953	0.0301007	0.050411	0.00269287	0.00141655	0.000288364	0.000177129	0.00189969	0.0193992	0.0570361	0.000732905	0.00260499	0.00333025	1.05587	0.00367088	0.0334569	0.0260948	0.00729768	0.174965	0.00664695	0.0305238	0.000525256	0.000449736	0.00186581	0.0254511	1.40518	0.0183439	0.0508476	0.00846674	0.0166079	0.0042442	0.000348771	0.000341787	0.0684146
T10 195T	T10 195T	0.0149815	0.0107731	0.000704647	0.0315436	0.0206024	3.06476	0.742229	0.000909628	0.0277873	0.0068786	0.00156329	0.200862	0.001499	0.000228368	0.0741627	0.369423	0.147893	0.00496642	0.000499416	0.00415534	0.000137096	0.111509	0.11679	0.144003	0.00837642	0.0960925	0.00659358	0.189963	0.0139494	0.0325851	0.351685	0.0152128	0.0431312	0.00589423	0.00700383	0.00113114	0.00107364	0.0107407	0.0756887	6.38194	0.0353801	0.0828635	0.0120273	0.268721	0.00227544	0.00451473	0.00346533	0.00918376
T10 213N	T10 213N	0.000673897	0.0281954	0.0012798	0.0074201	0.003873	0.017852	0.220736	0.00117237	0.0145452	0.00832071	#DIV/0!	0.13192	0.00202258	0.000590228	0.00013776	0.0130685	0.0561592	0.0143782	0.000249746	0.000232609	0.000261968	0.0012059	0.06983	0.227683	0.00940838	0.0149369	0.00231168	1.58996	0.00135451	0.0109434	0.0952985	0.0165593	1.53441	0.00125473	0.104995	0.000527491	0.0012495	0.00122846	0.0364254	2.11212	0.11863	0.010335	0.00127012	0.0152841	0.00189223	0.000660508	0.0179251	0.138075
T10 213T	T10 213T	0.0032349	0.0163066	0.00140921	0.128594	0.0288957	0.211587	1.54208	0.00252356	0.00272353	0.0293101	0.00137031	0.467115	0.00176502	0.000847402	0.152271	0.983192	0.179938	0.0387376	5.63435e-05	0.00405051	7.10933e-05	0.374865	0.197805	2.33056	0.00771858	0.382753	0.003981	0.169793	0.060767	0.105886	0.364223	0.00121557	0.162175	0.00267279	0.0197578	0.00174691	0.0115131	0.00854077	0.203346	13.8347	0.236379	0.0800225	0.0150676	0.0857869	0.0010102	0.00155221	0.000431169	0.0191881
T10 219N	T10 219N	0.00236618	0.00531597	0.000756369	0.0181758	0.00160839	0.00351611	0.185313	0.00279109	0.00327884	0.0277247	0.000190113	0.116422	0.00485462	0.000750049	0.00317708	0.0368986	0.0201453	0.00518336	0.000251868	0.000244566	0.00142013	0.0031475	0.0190872	0.093781	0.0018445	0.005242	0.00272653	0.914043	0.00584591	0.0282831	0.0499129	0.000841317	0.497436	0.00202235	0.10208	0.000239284	0.0257402	0.00277498	0.0146888	1.11963	0.0431501	0.0244478	0.00706875	0.01898	0.000243317	0.000956586	0.00111746	0.3299
T10 219T	T10 219T	0.0304918	0.0109992	0.000600927	0.0187584	0.00650386	1.44221	0.770682	0.00123099	0.0200972	0.0101101	0.000426877	0.218745	0.0011698	9.02035e-05	0.0456173	0.401621	0.169778	0.0072795	0.00113042	0.00961826	0.000261949	0.0754935	0.0669375	0.096464	0.00524001	0.0583024	0.00894814	0.607846	0.0198676	0.0487253	0.539252	0.00137138	0.211725	0.00986594	0.050444	0.000843013	0.00423473	0.0334612	0.0423564	3.92994	0.0165831	0.118602	0.00913722	0.102301	0.000405689	0.00824319	0.00118738	0.131463
T10 236N	T10 236N	0.00154613	0.00763893	0.000552841	0.0184662	0.00226429	0.0251911	0.0396056	0.00053407	0.000804208	0.00241405	9.66934e-05	0.0970356	0.00130769	0.00241883	0.00026513	0.0171224	0.0415789	0.0062402	0.000195563	0.000114927	0.000502587	0.000348567	0.048081	0.0386286	0.000837527	0.00146208	0.00379028	1.0531	0.00549666	0.0329472	0.0189962	0.000536171	0.175764	0.00588774	0.0312518	0.000198275	0.000197247	0.0018506	0.0232813	0.98292	0.00189845	0.0463188	0.0177165	0.00996051	0.000696486	0.00034135	0.000131824	0.028291
T10 236T	T10 236T	0.0188914	0.0178674	0.00111556	0.0927277	0.0129909	0.393701	0.250516	0.00082009	0.0219241	0.00784094	0.0010584	0.275071	0.000168513	0.00116211	0.0359804	0.225168	0.230714	0.00699095	0.000376329	0.00325769	0.000543767	0.0396072	0.169303	0.446722	0.00210645	0.160727	0.00536314	0.170858	0.0056653	0.00372548	0.166804	0.0463864	0.0245146	0.00319804	0.0657334	0.00206916	0.00147206	0.00459947	0.0244627	4.10888	0.0638145	0.0590633	0.026938	0.0241366	0.0039992	0.00204251	0.000250224	0.004479
T10 246N	T10 246N	0.0148466	0.0105059	0.00126376	0.00611709	0.00089109	0.00745339	0.0252604	0.000401014	0.00163845	0.00204367	0.000119274	0.109397	0.00152664	0.00317363	0.000389929	0.011978	0.0357955	0.00198871	0.00015133	#DIV/0!	#DIV/0!	#DIV/0!	0.0162524	0.0316068	0.00283309	0.00629483	0.00156243	1.54921	0.00556299	0.0521359	0.0159298	0.000228721	0.151541	0.00499129	0.0188921	0.00186386	0.000944828	0.00227723	0.0156802	0.91158	0.0241649	0.0430368	0.0123395	0.00538362	0.000203439	0.000278797	6.06912e-05	0.0405606
T10 186N	T10 186N	0.00107071	0.00121181	2.76751e-05	0.0111269	0.000562433	0.0019681	0.140253	0.000226841	0.00235525	0.00359723	8.72891e-05	0.07479	0.00183655	0.000250035	0.000758915	0.00544029	0.0269638	0.00445716	5.25219e-05	0.00025611	#DIV/0!	0.000969621	0.0304768	0.0769506	0.00034706	0.00143172	0.00139877	2.84005	0.00149266	0.0120713	0.0532015	0.000348331	0.584138	0.000736764	0.166241	0.00040037	0.0106775	0.000248237	0.0164394	1.16642	0.0023698	0.00667346	0.00241115	0.00994618	0.000232271	0.000106056	0.000155762	0.0995954
4N	4N	0.000463482	0.00171378	0.000198234	0.0139488	0.00285981	0.000388249	0.113076	0.000646501	0.00215743	0.0183322	4.41152e-05	0.0565081	0.00167241	0.000349838	0.00169447	0.00563649	0.0706223	0.00363451	7.70354e-05	0.000347396	4.41997e-05	0.000270197	0.0301225	0.141669	0.00110285	0.010564	0.00197151	1.12882	0.00121344	0.021052	0.0329994	9.95677e-05	0.490642	0.00105027	0.0354789	0.000124805	0.000672411	0.000869403	0.0220015	0.905168	0.00293667	0.00910697	0.00256684	0.0103924	0.00039121	0.000446856	0.000210441	0.125391
10T	10T	0.0183987	0.0450609	0.00253765	0.219044	0.0233958	0.488458	0.161253	0.00367239	0.0205504	0.0338937	0.00191775	0.218266	0.00263478	0.00439264	0.0638877	0.0893721	0.556954	0.0180467	0.00160528	0.00737714	0.000290601	0.0867925	0.167336	0.109013	0.0112497	0.164337	0.0205683	0.663687	0.0368988	0.0925378	0.330689	0.0197367	0.0958074	0.0167328	0.023004	0.00280514	0.00145937	0.0242115	0.088596	2.95404	0.0461997	0.567663	0.0190429	0.171772	0.00095947	0.00475918	0.00176199	0.0430213
10N	10N	0.00132844	0.0138787	0.00143297	0.0451636	0.013184	0.0129795	0.020239	0.00170702	0.00225084	0.00891241	6.76095e-05	0.0931897	0.00237896	0.00442532	0.00028766	0.00831601	0.144403	0.008495	0.0010325	0.000744937	0.000113362	0.000212249	0.0117701	0.0248193	0.00245143	0.00497006	0.00785113	1.5866	0.00759544	0.0323522	0.0245126	0.000669917	0.175699	0.0202925	0.0533936	0.000235465	0.000449149	0.0053764	0.0311308	0.748957	0.0235416	0.14729	0.00943068	0.0100554	0.00106839	0.000496088	0.000127398	0.0925116
16N	16N	0.00167369	0.00672491	0.000307065	0.0179604	0.00326959	0.0126734	0.0383144	0.000342173	0.00248225	0.00750636	0.000213228	0.046339	0.000636116	0.000111249	0.00124158	0.0118347	0.0682701	0.00558652	0.000150237	0.000370059	0.020593	0.00257163	0.0331674	0.0494644	0.00141263	0.00789543	0.00204506	2.47282	0.00109274	0.00950807	0.092765	0.00454553	0.224259	0.00112687	0.0570026	0.000136677	0.000410093	0.00359941	0.0164033	0.582888	0.00477211	0.0221986	0.00218292	0.00615967	0.00033748	0.000397288	0.000445748	0.0810098
16T	16T	0.0020173	0.00645508	0.000636871	0.0327191	0.0157139	0.371032	0.237886	0.00135935	0.00957513	0.0341671	0.000495826	0.169753	0.000879779	0.000669785	0.0183071	0.208019	0.20367	0.0137788	0.00147478	0.00400494	0.000160225	0.0684913	0.135997	0.0530399	0.00256918	0.0323281	0.00440427	0.0663865	0.00562258	0.0560328	0.528586	0.00222665	0.0152634	0.00427682	0.000854642	0.00268493	0.000451632	0.00884321	0.066452	2.8996	0.0148724	0.168866	0.00530436	0.139434	0.000246806	0.00370646	0.00179171	0.00454304
35N	35N	0.00171995	0.00384186	0.000114932	0.025258	0.00435802	0.314049	0.0868125	0.00119298	0.00282576	0.0066323	0.00016389	0.0580623	0.00172233	0.000321086	0.001296	0.0047176	0.104001	0.0045173	0.000629523	0.000279111	7.11222e-05	5.50664e-05	0.037341	0.0208582	0.00368575	0.00676709	0.00745917	6.08036	0.00468626	0.0133269	0.0538774	0.000951116	0.3859	0.00299979	0.138264	0.000135293	0.00067332	0.00307073	0.0260938	0.795977	0.00169911	0.0551945	0.0171078	0.00932	0.00028602	0.000618125	0.000558779	0.33077
36N	36N	0.0026078	0.00448478	0.000139508	0.035745	0.0103017	0.0406675	0.149795	0.000544959	0.00408523	0.0146361	0.000345759	0.0910713	0.000901331	0.000339053	0.012317	0.0736087	0.0650216	0.00490072	0.000335536	0.0010799	2.80943e-05	0.0158563	0.0319461	0.116677	0.00251844	0.0396406	0.00429113	1.02983	0.0086272	0.0202573	0.0933773	0.000291992	0.192373	0.00221302	0.0405563	0.00030892	0.00166012	0.00300475	0.0305725	1.17294	0.00989216	0.0243294	0.00728597	0.0112014	0.000338027	0.000523823	0.000116086	0.0865348
4T	4T	0.0110507	0.05075	0.00132231	0.203	0.0861649	0.611982	0.50857	0.00269388	0.0156982	0.0571007	0.00460697	0.234245	0.00240009	0.00120597	0.0473753	0.321997	0.61675	0.0167753	0.00145412	0.0154887	0.000144658	0.147968	0.195834	0.236118	0.0182749	0.411846	0.0147021	0.0247703	0.00993845	0.122045	0.38418	0.00122579	0.0728155	0.0037062	0.00283158	0.00675218	0.00713777	0.0370639	0.0783056	7.00903	0.0845688	0.223103	0.0319472	0.0321067	0.0014211	0.00588585	0.00110266	0.0198552
36T	36T	0.00556472	0.0123479	0.000364609	0.0649722	0.0411458	0.0719942	0.387101	0.0018859	0.00892446	0.0275234	0.00137769	0.257108	0.000940129	0.00041697	0.0593745	0.292494	0.112435	0.012024	0.000885668	0.00246735	9.888e-06	0.0839456	0.073957	0.524768	0.00478973	0.182288	0.00917299	0.507677	0.0218291	0.0608212	0.11449	0.000336427	0.102367	0.0036771	0.0101149	0.00136418	0.00481122	0.00715489	0.0771263	3.42876	0.0541035	0.0576328	0.0758458	0.016267	0.000422143	0.000571491	0.000117732	0.0314008
34N	34N	0.000654548	0.0104007	0.000450324	0.0134242	0.00449332	0.184869	0.0444976	0.000719053	0.00499765	0.0132452	0.000144416	0.0708377	0.000701873	0.000864834	0.00239032	0.0224498	0.0737209	0.00888109	0.000181944	0.00104838	0.000191377	0.000666739	0.0258314	0.0327351	0.00349029	0.00354469	0.00834946	0.786176	0.00537585	0.0248528	0.0479417	0.00203138	0.0769194	0.00789729	0.00850219	2.94674e-05	0.000280475	0.00599199	0.0309581	1.06606	0.00435522	0.0853458	0.0231371	0.0121767	0.00114131	0.00106817	0.000389544	0.0575438
34T	34T	0.00200569	0.011717	0.000641639	0.0234629	0.00980453	0.786692	0.291945	0.00132267	0.0027651	0.00725001	0.000709525	0.124036	0.00103318	0.00196235	0.0147356	0.106277	0.181208	0.00770028	0.000429876	0.00295281	2.33276e-05	0.0302693	0.054621	0.0791111	0.00579285	0.0196535	0.0212528	0.842469	0.00573218	0.0185655	0.252887	0.00174688	0.107254	0.00812364	0.0170925	0.000237507	0.00193304	0.00835778	0.0733258	2.43759	0.00384398	0.195623	0.0325787	0.0811602	0.000804523	0.00330119	0.000969569	0.089134
35T	35T	0.264969	0.00428599	0.000594111	0.00983842	0.0058568	6.65867e-05	0.0285011	0.00121447	0.00117436	0.0148886	0.00338646	0.0150714	0.000648564	0.00317753	0.0116065	0.00641733	0.153337	0.00353082	0.000107385	0.000804869	4.47969e-05	0.00018637	0.0970255	0.0204016	0.0347637	0.00966766	0.0226102	0.00126265	0.752792	0.0119594	0.368981	0.000317423	0.00464433	0.0168576	2.34118e-05	7.70469e-05	0.000421562	0.00639024	0.0998343	0.242132	0.00235233	0.460279	0.0206144	0.0156867	0.00012218	0.00125201	0.000993783	0.0228118
32N	32N	0.000532579	0.0151588	0.000511372	0.0203275	0.0039378	0.245094	0.0410966	0.000613968	0.000837112	0.00284225	0.000380453	0.0735997	0.000944049	0.00159423	0.00143383	0.0190089	0.167072	0.00753545	0.00117315	0.000273622	6.56032e-05	0.000596516	0.0328014	0.0191339	0.00210766	0.00248992	0.0167366	1.00231	0.00423497	0.0182325	0.0540919	0.000819435	0.0776658	0.00435044	0.0141308	6.66996e-05	0.000377113	0.00645906	0.0537746	1.15061	0.00191302	0.0936338	0.0347154	0.0137238	0.000367868	0.000701266	0.000459711	0.0664056
33N	33N	0.00117554	0.00221073	0.000243916	0.0223616	0.00283622	0.0730111	0.0849673	0.000430848	0.00211328	0.018468	0.000123996	0.0581797	0.00097656	0.000379514	0.00165464	0.00489924	0.0689716	0.00470951	0.000412814	0.000593456	0.000204972	0.00058892	0.0197428	0.0349176	0.00258959	0.004551	0.00318331	2.61611	0.00158133	0.0115973	0.0667093	0.000248868	0.335686	0.00431625	0.0592597	3.31695e-05	0.000639733	0.00203625	0.0449961	0.910911	0.00133065	0.0198882	0.00551423	0.0196558	0.000240686	0.000276495	0.00171518	0.0779097
33T	33T	0.00039315	0.00428599	0.000594111	0.00983842	0.00994302	6.65867e-05	0.0285011	0.00121447	0.00117436	0.0148886	0.00338646	0.0150714	0.000648564	0.00317753	0.0116065	0.00641733	0.153337	0.00353082	0.000107385	0.000804869	4.47969e-05	0.00018637	0.0970255	0.0204016	0.0347637	0.00966766	0.0226102	0.00126265	0.752792	0.0119594	0.368981	0.0871577	0.00464433	0.0168576	2.34118e-05	7.70469e-05	0.000421562	0.00639024	0.0998343	0.242132	0.00235233	0.460279	0.0206144	0.0156867	0.00012218	0.00125201	0.000993783	0.0228118
29N	29N	0.000999088	0.00408599	0.000672929	0.0197877	0.00330314	0.00268375	0.0481043	0.000191729	0.00732138	0.0151797	0.000154191	0.0358271	0.000598573	0.00035872	0.00186397	0.00716518	0.0470456	0.0048109	5.98656e-05	0.000225881	0.000116568	0.000266687	0.00889363	0.0125297	0.00211728	0.00652853	0.00501137	2.33326	0.00209253	0.0166238	0.0342272	0.000347703	0.150599	0.000796067	0.0207552	3.27787e-05	0.000661567	0.0038796	0.0211941	0.770059	0.00080608	0.016131	0.0109193	0.00609709	0.000122513	0.000276386	0.000209706	0.0946417
30N	30N	0.000722833	0.00174609	7.6912e-05	0.0341215	0.00309467	0.00248281	0.151029	0.00100424	0.00386931	0.0126661	9.24984e-05	0.0524674	0.00174759	0.000267581	0.000474042	0.00831585	0.126039	0.0040226	0.000139603	0.000326727	6.3156e-05	0.000503856	0.00809185	0.126396	0.00276253	0.00837393	0.003707	1.1583	0.00229589	0.0177018	0.0518566	0.000549546	0.660215	0.00135004	0.0804764	0.000285868	0.00108942	0.00155083	0.0315534	0.906732	0.00203104	0.0220369	0.00459392	0.0192741	0.000213741	0.000773497	0.0002326	0.132496
30T	30T	0.00393347	0.0147232	0.000576439	0.0822375	0.0353328	0.332013	0.325811	0.00158908	0.00344617	0.0310303	0.00112516	0.125919	0.00111888	0.000665093	0.0462312	0.098576	0.147535	0.0119535	0.000442297	0.00268979	0.00010679	0.0519777	0.05226	0.222187	0.00903373	0.093585	0.00851979	0.554235	0.0139671	0.029486	0.182082	0.00971749	0.34857	0.00540992	0.0439018	0.00119516	0.00252047	0.0122706	0.100408	3.76169	0.037314	0.12035	0.016664	0.0510032	0.00110427	0.00310675	0.000612569	0.0471844
31N	31N	0.00310494	0.00973877	0.000622125	0.0241999	0.0185113	1.29253	0.424103	0.00109706	0.00741485	0.0152346	0.000619097	0.114377	0.00135433	0.000727291	0.00315744	0.313415	0.200573	0.00772049	0.000990883	0.00369978	0.000113938	0.0503641	0.0581945	0.120076	0.00582468	0.0259076	0.0141079	1.00268	0.00762657	0.0336609	0.409862	0.00204604	0.214849	0.0059479	0.0321036	0.000901373	0.00182344	0.0120203	0.0546946	2.12909	0.00323516	0.127072	0.0365471	0.0450275	0.00174842	0.00479411	0.00120329	0.0767068
31T	31T	0.000556152	0.00274346	0.000120795	0.0223104	0.00273196	0.018111	0.10568	0.000471536	0.00439459	0.00794278	0.000180233	0.0440004	0.00103216	0.000705868	0.000321772	0.00977517	0.0502031	0.00522036	0.000131175	0.000257287	2.72434e-05	0.000701006	0.0207363	0.110757	0.00211169	0.00806844	0.00295337	2.26627	0.00353824	0.0166045	0.157204	0.000157892	0.386826	0.00119387	0.061305	0.000211289	0.00114987	0.0026814	0.0388689	0.718511	0.00195065	0.0187748	0.00689814	0.00874778	0.00056903	0.000209802	0.000249969	0.159916
32T	32T	0.00469026	0.00753821	0.000450503	0.00654454	0.00629248	0.35439	0.17264	0.000586626	0.00254625	0.00624667	0.00143425	0.102951	0.000747403	0.00107384	0.0145903	0.0657428	0.138332	0.00681464	0.000819654	0.00218257	0.000206734	0.0265862	0.0241684	0.0473132	0.00321478	0.0194719	0.0175883	0.898524	0.00354838	0.0168587	0.163382	0.00299029	0.0746782	0.00420015	0.0120882	0.000232657	0.00100478	0.00944472	0.0518104	1.97451	0.00574032	0.110225	0.02571	0.0591078	0.000956415	0.0019202	0.000445174	0.0513061
28N	28N	0.00164579	0.00568787	0.000991504	0.01263	0.00428497	0.0738241	0.0560798	0.000386331	0.00181906	0.00503334	0.000495199	0.0684014	0.000950548	0.000558704	0.000858052	0.023271	0.0633549	0.00367001	0.000166221	0.000356244	2.72083e-05	0.000708191	0.00954842	0.0190995	0.00140677	0.00382622	0.00994199	1.80869	0.00595742	0.0280467	0.0658539	0.00026805	0.152776	0.00384304	0.0385218	0.000168297	0.000294564	0.00349773	0.0245751	0.65025	0.00057897	0.0453674	0.0153438	0.0140303	0.00402293	0.000675385	5.46278e-05	0.0983881
28T	28T	0.00104454	0.00747563	0.000452851	0.00906254	0.00451642	0.1079	0.105402	0.000437947	0.00570959	0.00408293	0.00129527	0.0855724	0.000653683	0.00105589	0.00242904	0.0361949	0.141901	0.00348367	0.000519206	0.00101547	7.92444e-06	0.00296298	0.0147687	0.0233344	0.00346256	0.00627404	0.00944029	1.68867	0.00484127	0.0276017	0.0601796	0.000333194	0.147	0.00517972	0.0334858	0.000334409	0.0004938	0.00552726	0.0277699	1.37304	0.00139968	0.0635148	0.0282913	0.0132453	0.00147409	0.000681707	0.000287075	0.0979176
29T	29T	0.0191888	0.0315514	0.00064105	0.0804977	0.0400966	2.42188	0.654504	0.00224534	0.0269567	0.0420885	0.00275164	0.201776	0.000990023	0.00109243	0.0829143	0.37131	0.251813	0.0195521	0.000980717	0.00455068	0.000235417	0.0915242	0.148634	0.325064	0.0151763	0.157122	0.0221393	0.00846956	0.00768604	0.0418943	0.41474	0.122723	0.0314045	0.00474642	0.000409971	0.00247741	0.0075694	0.0300897	0.183154	5.85556	0.0604437	0.264113	0.0440244	0.191303	0.00237551	0.0121453	0.00211883	0.00349537
T11 065N	T11 065N	0.000370059	0.00265513	0.00040275	0.00709805	0.0017375	0.120854	0.0329721	0.000712832	0.00252626	0.00266749	0.000438023	0.0490632	0.000664573	0.000846184	0.000138451	0.00994774	0.0311621	0.00201401	3.74336e-05	8.10318e-05	2.18278e-05	0.000605146	0.012463	0.00954464	0.000801591	0.000420873	0.00268371	0.441813	0.00101346	0.00816061	0.0143283	0.000743126	0.0875528	0.00256507	0.0478623	0.000195325	8.55608e-05	0.00109129	0.0124829	1.15084	0.000861575	0.0177944	0.00624732	0.00409593	0.000348506	0.000276327	9.38071e-05	0.0327589
T11 065T	T11 065T	0.00429254	0.00986561	0.000246648	0.0441527	0.0206325	1.03208	0.255735	0.000715837	0.00341383	0.0144477	0.000984716	0.129849	0.000505871	0.00132985	0.0371645	0.0900541	0.124195	0.00299865	0.000138738	0.00154583	0.000347478	0.0456053	0.126745	0.184574	0.00410421	0.0242116	0.00584901	0.0217371	0.00115982	0.0192983	0.331048	0.0612273	0.0140107	0.00280999	0.00199078	0.0019257	0.000545356	0.0126866	0.0486079	4.66849	0.0441071	0.0663433	0.0225208	0.0962194	0.000931457	0.00476285	0.00345773	0.00530153
T11 083N	T11 083N	0.000955681	0.00211247	0.000196563	0.0177545	0.000600269	0.00495405	0.0847005	0.000483182	0.00252178	0.00719503	4.51556e-05	0.0593315	0.00151018	0.00049433	0.000560527	0.00982172	0.0381232	0.00161231	0.00023293	8.74923e-05	3.46072e-05	0.00255082	0.00734134	0.0585212	0.00203294	0.00257118	0.00207239	1.32266	0.00125073	0.00777211	0.0352134	0.000251582	0.279654	0.00104694	0.0732807	0.000341581	0.000104206	0.000520216	0.018554	1.24902	0.00198695	0.00746349	0.00150227	0.00935634	0.000848075	0.000258678	0.000186941	0.0662261
T11 083T	T11 083T	0.0195924	0.0136732	0.000669133	0.0748045	0.0182614	1.86036	0.894537	0.00126171	0.0118796	0.0106966	0.00160964	0.264525	0.00140206	0.000806531	0.0773425	0.295411	0.303594	0.00431153	0.000278397	0.00937899	0.000176535	0.17751	0.140023	0.158047	0.0091179	0.0482629	0.0101908	0.182056	0.0128553	0.0378745	0.590136	0.00931534	0.055209	0.00604119	0.0104634	0.00103699	0.00187831	0.0120531	0.0710679	0.1144	0.000300837	0.125901	0.0224203	0.247363	0.000327533	0.00762543	0.00238065	0.0152014
T11 084N	T11 084N	0.00115061	0.00986428	0.000480303	0.00948836	0.00114748	0.0149497	0.0461038	0.00147411	0.00178138	0.00485762	#DIV/0!	0.0759438	0.00162512	0.00237573	0.000524595	0.025851	0.0798713	0.00258525	0.000708896	0.000128352	0.000245705	0.000546245	0.0213354	0.040463	0.00391739	0.00050274	0.00260694	0.197202	0.00144175	0.0197814	0.0192471	0.00484318	0.133166	0.00223718	0.0163097	0.000111172	0.000371938	0.00087061	0.0120222	0.792389	0.00644098	0.0364413	0.00492482	0.00928673	0.000411342	6.53493e-05	0.000155133	0.0136049
T11 084T	T11 084T	0.00574638	0.0043251	0.000532119	0.0210351	0.00249063	0.98149	0.451569	0.00132934	0.00550809	0.00507193	0.00051012	0.114472	0.000762515	0.00116279	0.0150029	0.205404	0.189385	0.00321169	0.000432655	0.000828728	0.000162013	0.0656165	0.0711087	0.0458627	0.00377774	0.00973418	0.00516936	0.264162	0.00295865	0.0184526	0.318077	0.00413772	0.102738	0.00567099	0.010844	0.000856513	0.000480927	0.00432415	0.0257049	2.50011	0.00576221	0.0682019	0.00831478	0.143215	0.00107926	0.00243968	0.000670978	0.0234399
T11 085N	T11 085N	0.00113391	0.00180256	0.000255011	0.0184026	0.00131836	0.0115483	0.14556	0.00036114	0.00310757	0.00532224	0.000433283	0.0885349	0.00209176	0.000760865	0.000332279	0.0128425	0.0422887	0.00255744	0.00128961	0.00011593	0.000171413	0.000385976	0.0229978	0.0672976	0.000823022	0.00518299	0.00193247	0.662624	0.00115662	0.0151571	0.0454081	0.000359587	0.401841	0.00150508	0.0462309	0.000273949	0.000123497	0.00143028	0.0199919	1.5321	0.00256378	0.0126486	0.00293911	0.0167452	0.000367004	0.000263692	0.000475236	0.0517862
T11 085T	T11 085T	0.00177429	0.00621803	0.000290146	0.0191025	0.00124968	0.0377589	0.179128	0.000282904	0.00262129	0.00575321	0.000308106	0.104773	0.00147822	0.000385259	0.00214788	0.0186603	0.0349691	0.00289509	0.000188922	0.000445767	#DIV/0!	0.0053016	0.0363043	0.0602466	0.000492301	0.00796541	0.00177278	0.601636	0.00165655	0.0226021	0.0668041	0.000488956	0.447734	0.00122916	0.0286839	0.000400304	0.00220377	0.000653334	0.027452	1.30523	0.00282643	0.0131973	0.00269729	0.024964	0.000254976	0.000300139	0.000178108	0.0442899
T11 107N	T11 107N	0.003231	0.00240421	0.000481075	0.0213962	0.00113305	0.00590308	0.0684629	0.000888483	0.00707465	0.0224121	5.82293e-05	0.0906976	0.00231464	0.00114536	0.000444806	0.015924	0.0503088	0.003218	0.00190281	0.000123743	0.000135253	0.00280689	0.0107076	0.0458557	0.00076444	0.00307476	0.00171998	1.30345	0.00198649	0.0128891	0.0163529	0.000254315	0.396375	0.00165786	0.0715612	0.00202108	0.000364044	0.00119707	0.015365	0.759237	0.00230311	0.0188488	0.00414578	0.00724144	0.000277002	0.000383792	0.00265576	0.064722
27N	27N	0.000322185	0.00675147	0.000471675	0.0172269	0.00319945	0.0427167	0.0414197	0.000546638	0.00227626	0.00741283	0.000235095	0.0724746	0.000653825	0.00128086	0.000319522	0.0110427	0.0788563	0.00492847	0.000481689	0.000213136	0.000192856	0.000243022	0.01682	0.0248988	0.00172405	0.00603169	0.0101382	0.386502	0.002472	0.0130393	0.0125634	0.000424551	0.166675	0.00347298	0.0247605	0.000363696	0.000325061	0.00672952	0.028164	0.711387	0.00312622	0.0507059	0.0222746	0.00725557	0.000900937	0.000811331	0.000238486	0.0486643
27T	27T	0.00293544	0.0138872	0.000941664	0.0221939	0.00470332	0.0972822	0.110825	0.000455994	0.00485769	0.015748	0.000885491	0.0833751	0.00086765	0.00150686	0.0044944	0.0565299	0.149269	0.00873356	0.000214749	0.00164661	0.000139187	0.0111099	0.0252966	0.0408787	0.00295201	0.0161341	0.0157189	0.197441	0.00369024	0.0170632	0.0623343	0.000893032	0.12665	0.0048962	0.0218586	0.000608899	0.000730052	0.00440921	0.0456987	0.932204	0.00594698	0.112559	0.0337058	0.0322158	0.000585941	0.00207318	0.000282203	0.025366
T11 107T	T11 107T	0.00898924	0.017103	0.000460104	0.0399483	0.0149903	1.7795	0.874967	0.00188723	0.0186331	0.0239391	0.0006006	0.24519	0.00228063	0.000598812	0.125268	0.467548	0.229315	0.0138169	0.000557469	0.0124366	0.000391792	0.0965012	0.129448	0.295374	0.0064149	0.0449087	0.00646456	0.0105644	0.00240106	0.0279879	0.39835	0.00307899	0.0548953	0.0101425	0.00111003	0.000454044	0.00148005	0.0071284	0.0741754	6.3892	0.0324087	0.0884054	0.0260931	0.0960751	0.000449239	0.00397717	0.000712033	0.00488151
T11 046N	T11 046N	0.00119271	0.00876042	0.000159128	0.0104074	0.00267009	0.0124497	0.0674724	0.000217737	0.00428845	0.0101444	0.000563158	0.0726255	0.000662972	0.000917541	0.00163004	0.00936462	0.0261356	0.00246015	0.000140413	0.000248017	0.000185757	0.000483082	0.0717475	0.0338131	0.000641064	0.00388539	0.00162969	1.12014	0.000651567	0.0180356	0.0161109	0.000742156	0.332136	0.00125498	0.0358317	0.000198735	0.000531581	0.000770175	0.0140381	0.973583	0.00897811	0.011263	0.00247478	0.0101202	0.000555864	0.000132529	7.63897e-05	0.0915023
T11 046T	T11 046T	0.0330562	0.00757137	0.000800382	0.0291898	0.0229352	1.55875	0.722729	0.000567589	0.0149473	0.00385141	0.00305099	0.208109	0.00147474	0.000771345	0.0434141	0.28349	0.208104	0.00576938	0.000550575	0.00671543	0.000265788	0.143394	0.15143	0.0803885	0.00417904	0.0482594	0.0108602	0.00639118	0.00676087	0.0395564	0.572204	0.0138449	0.00973222	0.00999183	0.000513439	0.000683274	0.000780992	0.0194497	0.0453505	6.46662	0.0362439	0.113414	0.0122344	0.159661	0.000526054	0.00363982	0.00122523	0.00356707
T11 047N	T11 047N	0.00150163	0.00116362	2.91521e-05	0.00963046	0.00171062	0.00331299	0.115291	0.000175266	0.004548	0.00805793	0.000212655	0.0746744	0.00109702	0.00012251	0.000605023	0.00667442	0.0210587	0.00329365	0.000109509	0.00070564	0.000102386	0.000784035	0.01876	0.102507	0.000530294	0.00330193	0.00134874	1.36116	0.00200162	0.0121391	0.0496015	0.000594004	0.420421	0.000765396	0.0568283	0.000122786	0.000502645	0.000763322	0.0144986	1.24525	0.00408358	0.00408237	0.00159639	0.0162937	0.00036114	0.000137289	0.000395015	0.0491501
T11 040N	T11 040N	0.00204874	0.00319262	0.000325484	0.0181733	0.00193033	0.0214176	0.0879745	0.000342529	0.0060645	0.00869468	0.000578113	0.0651656	0.00197748	0.000527625	0.000386976	0.00802744	0.030667	0.00249819	0.000276036	4.87906e-05	0.000256493	0.00033895	0.0328076	0.0433254	0.00149802	0.00108939	0.00254831	0.696847	0.00319284	0.0117539	0.0369282	0.000959614	0.331008	0.0030099	0.0757146	9.38074e-05	0.000340798	0.00146778	0.0198418	1.04257	0.00339475	0.0238907	0.00975786	0.0116496	0.000131986	0.000471118	0.000196956	0.119324
T11 040T	T11 040T	0.0264858	0.013779	0.000460266	0.0411518	0.0129382	0.334087	0.650975	0.000609819	0.0115734	0.00814077	0.00226569	0.136567	0.000897543	0.00129816	0.0306628	0.120056	0.17301	0.00325502	0.000163356	0.00502486	0.00025955	0.0754901	0.125778	0.0867779	0.00488335	0.022499	0.00775463	0.00173305	0.0021741	0.018332	0.363797	0.011085	0.00992187	0.00691071	0.000270759	0.002132	0.000797105	0.00932034	0.0341769	3.88727	0.0130749	0.0720153	0.0180534	0.091506	0.00029799	0.00473267	0.00172148	0.0025133
T11 047T	T11 047T	0.00334509	0.0253476	0.000733823	0.0943403	0.0186353	0.684816	0.668605	0.00150523	0.00354329	0.0248055	0.00125227	0.279991	0.00201379	0.000934067	0.155968	0.259594	0.151652	0.0122076	0.000488937	0.00690295	0.000641465	0.0832308	0.202503	0.718609	0.00389403	0.155066	0.00649168	0.515614	0.0103287	0.0523793	0.23925	0.0124136	0.15142	0.00421423	0.0208805	0.00105531	0.00134915	0.0136271	0.11059	8.75444	0.0828695	0.100966	0.0243739	0.133447	0.00164579	0.00503756	0.00114031	0.0195996
T11 011T	T11 011T	0.0226814	0.016159	0.000843312	0.0399097	0.0136652	1.85368	0.80902	0.000495913	0.0165042	0.0153471	0.000677507	0.247276	0.00259649	0.00209896	0.00904123	0.725811	0.160405	0.00744587	0.00117772	0.00228782	0.000143623	0.108245	0.218333	0.174135	0.00337325	0.0293107	0.0039157	0.00440511	0.0079346	0.051304	0.375463	0.00500501	0.061586	0.00820275	0.000535101	0.000406477	0.00196736	0.00716745	0.0321404	6.1429	0.0109013	0.110683	0.0235342	0.179439	0.00294872	0.00706439	0.00116874	0.00397713
T11 041N	T11 041N	0.00367555	0.00568617	0.000218105	0.0139316	0.00314722	0.11298	0.175631	0.000367284	0.00604963	0.0203246	0.00299842	0.0969899	0.00148597	0.0020121	0.00663493	0.131306	0.0698111	0.0036714	0.000369548	0.000653005	0.000246589	0.0235815	0.0432746	0.03958	0.00172032	0.0092471	0.00560679	0.481121	0.0166657	0.0172743	0.376521	0.00268846	0.0785482	0.0014196	0.0229498	0.000425193	0.000257936	0.00232838	0.0118124	2.04518	0.00550639	0.0563674	0.00544164	0.0648051	0.000293376	0.00354381	0.00131611	0.0254328
T11 041T	T11 041T	0.0058065	0.00657058	5.63166e-05	0.0187228	0.00874925	0.129897	0.53107	0.000498213	0.0111107	0.0164311	0.00116678	0.23546	0.000777599	6.29553e-05	0.024276	0.37671	0.0877929	0.0127453	0.000356651	0.00550311	0.000192464	0.0658035	0.131187	0.877867	0.00110732	0.0859938	0.00148765	0.0188151	0.0083573	0.0754394	0.153762	0.0658164	0.00517539	0.000530693	0.000332168	0.000538767	0.00132483	0.0018165	0.0534204	5.13031	0.0871416	0.0261907	0.00225603	0.0254469	0.0031506	0.00200123	0.000217067	0.00173816
T11 005N	T11 005N	0.000566894	0.00303349	0.000160901	0.00325102	0.00136233	0.00283364	0.110405	0.000657518	0.00259816	0.00566715	7.07844e-05	0.0570914	0.00199886	0.000315359	0.00019578	0.0030899	0.023892	0.00098035	0.00020339	0.000248501	#DIV/0!	0.000216964	0.0501093	0.0468185	0.00052675	0.00901094	0.00215534	1.7168	0.000908886	0.00974857	0.0259167	0.000264989	0.594154	0.000765446	0.0761565	0.000691583	0.00024333	0.00026034	0.0156738	0.924305	0.00411009	0.00455267	0.00124126	0.0092755	0.00017551	4.96772e-05	0.000380692	0.195134
T11 005T	T11 005T	0.000158001	0.00653207	0.000243854	0.0912374	0.0138289	0.00397453	0.331681	0.00129679	0.014218	0.0468893	0.00303321	0.221795	0.00121773	0.000634389	0.117075	0.0257284	0.281262	0.00994079	0.00379259	0.0220744	5.19634e-05	0.0825833	0.332118	0.799842	0.000854873	0.152652	0.00576786	0.11798	0.072695	0.0533876	0.310471	0.000614043	0.344218	0.00297326	0.00661065	0.0038793	0.000396656	0.00281351	0.114723	8.74777	0.269288	0.0682155	0.017089	0.549369	0.00273042	4.17732e-05	0.000219199	0.0050236
T11 007N	T11 007N	0.00102064	0.00262836	0.000333411	0.0132828	0.000457587	0.0248949	0.051402	0.000237937	0.00158992	0.0056731	9.42842e-05	0.0631057	0.000249948	0.000446189	0.000104378	0.0153729	0.0191839	0.00298214	0.000334489	0.000123163	0.000133616	0.000389435	0.0048101	0.0114189	0.000429705	0.00214494	0.000913043	0.908995	0.00101253	0.0082541	0.0145216	0.000388537	0.103706	0.000823824	0.0476701	0.000119682	0.000270285	0.000240584	0.00603298	0.868481	0.00223996	0.00924554	0.00201879	0.00664494	0.00124777	4.83745e-05	0.000147017	0.0291922
T11 007T	T11 007T	0.0199012	0.0193741	0.00126649	0.0653772	0.0336041	1.0524	1.16597	0.00233845	0.0185097	0.0140895	0.0011119	0.492805	0.00273422	0.00457423	0.0453249	0.4116	0.253279	0.00841786	0.00356649	0.00799547	0.000326345	0.0952986	0.143936	0.162247	0.00666092	0.0728952	0.0125737	0.00434974	0.00856989	0.0508658	0.357366	0.0192354	0.0468676	0.0061825	0.000388092	0.00354942	0.00131136	0.0116412	0.0477328	6.7985	0.0349051	0.156956	0.0155969	0.308687	0.00163811	0.00593394	0.00184583	0.009623
T11 009N	T11 009N	0.00166345	0.00130012	0.000467034	0.0123633	0.0640852	0.000976146	0.0801867	0.00101894	0.00352265	0.00752441	0.000659919	0.0531505	0.00168229	0.000399858	0.000170177	0.00446641	0.0203364	0.00147066	0.000699346	0.000223005	0.00154466	0.000259609	0.0218526	0.0341142	0.000952146	0.00516034	0.00125864	1.73089	0.00204332	0.0149224	0.0167225	0.000282523	0.46096	0.00259318	0.0523624	0.000124703	0.00725061	0.000381035	0.0262431	1.15142	0.00272618	0.0110292	0.00129728	0.0100648	0.000150765	0.000131098	0.000124685	0.0961053
T11 009T	T11 009T	0.011506	0.0199162	0.00172933	0.116874	0.0170158	0.714835	0.901439	0.00229192	0.00711369	0.0192778	0.00109919	0.362164	0.00310364	0.00103161	0.134698	0.403877	0.160658	0.00962477	0.000337001	0.00417904	0.00074223	0.11781	0.235913	0.187378	0.00755648	0.0694113	0.00704866	0.555201	0.0458813	0.0417162	0.354166	0.0106015	0.225954	0.00535666	0.0217915	0.0017299	0.00485468	0.0116726	0.0798544	8.56172	0.11363	0.111693	0.00806462	0.160473	0.00255065	0.003451	0.00158937	0.031521
T10 276T	T10 276T	0.0124093	0.014408	0.00117007	0.0301955	0.0169782	1.14094	0.711571	0.00224209	0.0238589	0.0152031	0.00130096	0.224007	0.00176613	0.00171653	0.0362828	0.290279	0.176415	0.00847429	0.00111997	0.00454081	0.00100322	0.123076	0.155585	0.313944	0.00423385	0.0644424	0.0094079	0.118167	0.0789843	0.0357899	0.608718	0.00625463	0.0487692	0.00637375	0.00348975	0.000799378	0.00230435	0.00998827	0.0689695	6.03152	0.0464655	0.150288	0.0112389	0.244553	0.00034126	0.00308473	0.00108657	0.00760037
T10 288N	T10 288N	0.000120366	0.00172381	0.000428499	0.00522217	0.00140864	0.0173416	0.0341139	0.00050479	0.0067654	0.00147156	0.000127303	0.0669812	0.00207923	0.000932071	0.000262319	0.00171017	0.0731661	0.00251932	0.0010374	0.000396764	0.000153455	0.000289048	0.00520275	0.0479676	0.00157794	0.00428414	0.00157758	2.23573	0.00444643	0.0144431	0.0113065	0.00420105	0.533352	0.00131003	0.152754	0.000489596	0.0055232	0.0039925	0.00520595	0.394237	0.0107555	0.0146945	0.001562	0.00192917	0.000759372	0.000262657	0.00248531	0.13357
T10 288T	T10 288T	0.0228071	0.025326	0.000678792	0.101133	0.0777602	0.443057	0.9887	0.00147026	0.0175529	0.0202393	0.00690825	0.360656	0.00204995	0.000844174	0.156825	0.361038	0.356968	0.0112457	0.000419429	0.00923962	0.00036763	0.201001	0.229849	0.443464	0.00841485	0.236736	0.0144105	0.00434837	0.00408004	0.0851602	0.576828	0.0604156	0.0373964	0.00625958	0.000425726	0.00745786	0.00230445	0.0331281	0.15197	7.47226	0.106234	0.148698	0.0172465	0.233029	0.00140844	0.00480833	0.00149486	0.00232378
T10 250N	T10 250N	0.00385924	0.0010033	0.00023629	0.0102824	0.00267115	0.0017421	0.0814278	0.00180814	0.00155954	0.0125972	0.00318661	0.0493559	0.0014737	0.000642495	0.00144829	0.00809223	0.0149301	0.000966615	8.25691e-05	8.95774e-05	2.84721e-05	0.000348255	0.0296641	0.0428064	0.000660453	0.00209701	0.0012365	1.03261	0.000873024	0.0180252	0.028093	0.000782239	0.224798	0.000644331	0.0456311	9.43474e-05	0.000266403	0.000126861	0.0131992	0.626231	0.00256463	0.00580287	0.000622354	0.012362	0.000143892	0.000566831	9.01317e-05	0.0860701
T10 250T	T10 250T	0.00682985	0.00471281	0.000234225	0.0247223	0.00579534	0.888949	0.292979	0.000797517	0.00789755	0.016373	0.000793213	0.141439	0.00100654	0.000261033	0.00585686	0.122507	0.146719	0.00624359	0.000265835	0.00113238	0.000137488	0.0301747	0.0684133	0.0197167	0.0024682	0.0105418	0.00622779	1.86558	0.00117245	0.0236296	0.205972	0.0181525	0.124394	0.00200858	0.0328472	0.000691516	0.000905215	0.00481769	0.0332805	2.03383	0.00348454	0.0862222	0.00365394	0.236108	0.000619772	0.00528123	0.00143456	0.0397815
T10 267N	T10 267N	0.000839124	0.00334108	0.000210344	0.00738285	0.00368774	0.0010881	0.0799417	0.00172472	0.00488699	0.00477193	0.000148623	0.0878117	0.00243571	0.000196467	0.000293638	0.00541774	0.0292209	0.00297282	0.000249503	0.000232188	0.00014822	0.00070091	0.0213161	0.0284314	0.000875691	0.00353399	0.00132123	2.00723	0.00338148	0.0118447	0.0298443	0.00186951	0.646048	0.00154707	0.129756	0.000135206	0.000551743	0.000863307	0.0103063	1.06417	0.00274045	0.00507422	0.0031448	0.00784213	0.000163162	0.000159166	0.000465408	0.0674041
T10 267T	T10 267T	0.00675124	0.0139782	0.00196535	0.0656938	0.0338026	2.23361	0.735289	0.00217586	0.0187103	0.0076546	0.00343334	0.744972	0.00157095	0.000773367	0.0623568	0.231798	0.547333	0.0087379	0.000698253	0.0114424	0.000576103	0.157995	0.134388	0.385763	0.00687836	0.0724556	0.0141266	0.0108599	0.00252176	0.087243	0.748022	0.0172624	0.0528563	0.0112813	0.00130896	0.00376186	0.00310338	0.0304645	0.0663649	6.51717	0.089507	0.198231	0.0152098	0.175303	0.000184505	0.0120974	0.00129302	0.0101472
T10 268N	T10 268N	0.00920746	0.00248402	0.000397115	0.0182168	0.00308691	0.0302458	0.41248	0.000704383	0.00354805	0.00364907	0.00037162	0.129228	0.00131173	0.000382384	0.00916451	0.0618528	0.0663968	0.00172549	0.000262555	0.00131796	0.000146591	0.0303193	0.0804141	0.196644	0.00405706	0.019207	0.002115	1.40671	0.00210888	0.0216982	0.107734	0.000858205	0.569743	0.0020957	0.0545968	0.000498567	0.000670688	0.00111657	0.0271677	2.24265	0.0121934	0.0164735	0.00156513	0.0295785	0.000453588	0.000656419	0.000119301	0.0668408
T10 268T	T10 268T	0.0100211	0.00744379	0.00163788	0.0430261	0.0164809	0.641725	0.83452	0.000795403	0.018159	0.00529472	0.00134023	0.329545	0.00226192	0.000662926	0.0259341	0.355776	0.201688	0.00470507	0.00146989	0.00774267	0.000183744	0.152076	0.123144	0.237392	0.00707098	0.1024	0.00675939	0.72609	0.00657254	0.0933705	0.446217	0.00936702	0.213639	0.00657432	0.0335754	0.00397286	0.00352856	0.0111292	0.0685307	3.85808	0.0144459	0.0893476	0.00491629	0.0653882	0.000859202	0.00323368	0.000707803	0.0351906
T10 272N	T10 272N	0.00222309	0.00437197	0.000103284	0.00988677	0.000542784	0.017977	0.107243	0.000369754	0.00280357	0.0130754	0.000157799	0.0647979	0.000750686	8.97009e-05	0.00100814	0.0190671	0.0149279	0.00326619	8.36321e-05	0.000107264	#DIV/0!	0.004522	0.0411882	0.0396528	0.00177596	0.00580172	0.00112627	1.13426	0.00174408	0.0127108	0.0566118	0.0104206	0.483834	0.000559759	0.0498493	8.9899e-05	0.00036845	0.000387165	0.0103603	1.00566	0.0203554	0.00732325	0.000521239	0.0172654	9.2936e-05	0.000592394	9.22385e-05	0.0703275
T10 272T	T10 272T	0.0082998	0.00315217	0.000209969	0.0237133	0.00399752	0.456055	0.301059	0.00102451	0.0429282	0.0131837	0.000261343	0.116102	0.001201	0.000811752	0.017255	0.120118	0.0548881	0.00445054	0.000319591	0.00167911	0.00168748	0.0393907	0.0706499	0.0710376	0.00199097	0.00972066	0.00301849	0.94307	0.00279937	0.0203378	0.160141	0.0167721	0.274693	0.00204489	0.0321255	0.000426044	0.000478287	0.00228124	0.0153018	2.39926	0.00252063	0.0511292	0.00373369	0.0747624	0.000394684	0.00155437	0.000415346	0.0812593
T10 276N	T10 276N	0.000948503	0.00463822	4.6791e-05	0.01166	0.00129492	0.0174258	0.0701096	0.00059558	0.00546256	0.00549855	9.91537e-05	0.0742771	0.00102829	0.00023369	0.000447888	0.0178912	0.0544327	0.00280076	0.000512497	0.000238527	4.6964e-05	0.00425813	0.0171314	0.0564169	0.00287463	0.00514307	0.001133	1.69866	0.00137381	0.0108187	0.0684428	0.000337131	0.240508	0.00198105	0.0289474	0.000160542	0.000325649	0.00132265	0.0148147	0.840146	0.0016868	0.0187101	0.00140507	0.0171163	0.000966309	0.000383246	9.28992e-05	0.0536174
T10 246T	T10 246T	0.0256335	0.0125401	0.00044172	0.0484245	0.0198692	0.534053	0.884917	0.000388678	0.0185438	0.00902901	0.00365721	0.237373	0.00115428	0.00135418	0.0729548	0.433785	0.194822	0.00321992	0.000663741	0.0060691	0.000235253	0.154573	0.2458	0.0757317	0.00677817	0.0534032	0.00904432	0.0026841	0.00452085	0.0344095	0.526634	0.0206384	0.0181715	0.0107977	0.000317483	0.00216959	0.00211103	0.017605	0.0809791	4.25998	0.0163721	0.0995451	0.00891655	0.235168	0.000215309	0.00572597	0.000809218	0.00218426
T10 249N	T10 249N	0.00093911	0.00343064	0.000283208	0.0202091	0.00214165	0.00475661	0.105	0.00158616	0.0242847	0.0217911	8.15331e-05	0.049976	0.00177445	0.000408366	0.000643552	0.00713047	0.0185045	0.00625107	0.00334387	8.377e-05	0.000778653	0.00270823	0.0357731	0.0622595	0.00417072	0.0136003	0.0027939	1.47243	0.00133818	0.0622264	0.0293252	0.00511298	0.497934	0.002073	0.0575949	0.00142685	0.000644364	0.000721792	0.0324842	1.37808	0.0113991	0.00744028	0.00109961	0.010583	0.000374076	0.000344335	0.0026047	0.1088
T10 249T	T10 249T	0.022344	0.0173668	0.000642601	0.0703267	0.0157797	0.485439	0.891378	0.00636732	0.0134604	0.0104868	0.00543408	0.355529	0.00301295	0.00182424	0.0709576	0.224439	0.371849	0.00455379	0.00129019	0.013385	0.00182338	0.196181	0.283613	0.417636	0.00858582	0.143789	0.007572	0.00211646	0.0201133	0.069164	0.441206	0.00766421	0.0539374	0.0150282	0.000398891	0.00361931	0.00218855	0.0225103	0.0742618	12.411	0.123968	0.155383	0.00989472	0.233713	0.00372103	0.00329726	0.00322718	0.00230514
T10 186T	T10 186T	0.0189743	0.0189494	0.00162306	0.0104937	0.0163841	1.34531	1.20291	0.00344798	0.00364212	0.0170858	0.00252484	0.378762	0.000261801	0.00144049	0.158499	0.583375	0.273249	0.00862312	0.00102685	0.00624796	0.000676264	0.168973	0.291994	0.118135	0.00438706	0.0654654	0.0102847	0.15604	0.00573645	0.0723203	0.501455	0.0284285	0.0932913	0.00800593	0.0100423	0.00194652	0.00136238	0.011788	0.0426726	2.04846	0.0386259	0.133383	0.015855	0.326808	0.000585268	0.00428458	0.00289097	0.0160644
T10 191N	T10 191N	0.00173304	0.0019124	0.000109085	0.00212804	0.000676954	0.0019878	0.111012	0.000335924	0.00341024	0.0131292	4.62535e-05	0.0901055	0.00120522	9.1057e-05	0.00184552	0.0118345	0.0182288	0.00221963	#DIV/0!	0.00013542	6.9067e-05	0.00164541	0.0153513	0.0665315	0.000610953	0.00935015	0.00148543	1.85819	0.00112319	0.0235301	0.0654174	0.0024436	0.276686	0.00171152	0.0299299	0.00043093	0.000591859	0.000802105	0.0196367	0.98275	0.00552306	0.00843898	0.00161643	0.0179383	0.000338379	0.000101133	0.000696752	0.0816946
T10 191T	T10 191T	0.0205714	0.016528	0.000750761	0.047957	0.0297917	1.31942	0.607617	0.000919296	0.0074687	0.0260879	0.00145858	0.330325	0.000557276	0.000796091	0.0933429	0.197249	0.163448	0.00866069	0.000422	0.00364163	0.000511731	0.0422974	0.144397	0.109721	0.00586585	0.104423	0.00541098	0.394726	0.00366356	0.044533	0.275202	0.0161815	0.128791	0.00381667	0.0139373	0.00347633	0.00273808	0.013365	0.0807023	4.86987	0.0855515	0.0783737	0.011465	0.121805	0.000894937	0.00334385	0.00190604	0.0222337
T10 192N	T10 192N	0.00138616	0.0446975	0.000985836	0.00571521	0.00653484	0.0216979	0.12282	0.00172264	0.0206577	0.00618959	0.00219123	0.142416	0.00148808	0.00192971	0.000415036	0.0323238	0.0295609	0.00712075	0.000427464	0.000238148	0.000232719	0.0013117	0.116508	0.106011	0.000536538	0.00855858	0.00173704	1.61327	0.0046817	0.024297	0.0165414	0.0157568	0.371499	0.00413211	0.113644	0.000957688	0.000646675	0.000445688	0.018303	1.79032	0.0459365	0.0295715	0.00674681	0.00931586	0.00252671	0.000776909	0.000216742	0.0870626
T10 192T	T10 192T	0.00126666	0.0127546	0.00156742	0.100203	0.0138427	0.0650889	0.5175	0.00156377	0.00364903	0.0106587	0.00262134	0.304479	0.00145097	0.000971444	0.0648491	0.0334881	0.13452	0.00594947	0.000116501	0.00732583	0.000113842	0.0489366	0.276027	0.386152	0.00659359	0.167295	0.00987783	0.129861	0.00205104	0.0533121	0.227362	0.0585495	0.0382539	0.00565285	0.00151264	0.00284621	0.00168145	0.0073587	0.129286	6.09085	0.127232	0.0585097	0.00941071	0.238091	0.0032964	0.00215155	0.00219048	0.00322787
T10 193N	T10 193N	0.00113678	0.0137323	0.00059607	0.00768779	0.00146693	0.010637	0.0995747	0.00100142	0.00877072	0.00328369	#DIV/0!	0.090834	0.00164859	0.00135159	0.000557426	0.0178419	0.0313666	0.00554309	0.000129685	0.000291426	0.000126169	0.00163058	0.0375902	0.0839271	0.000773156	0.0105545	0.00201635	0.751501	0.00127848	0.012251	0.0324543	0.00257638	0.326748	0.00204332	0.0590944	0.000205579	0.00069984	0.00122822	0.016854	1.87419	0.00150607	0.016538	0.0026848	0.013512	0.00192206	0.000155485	0.000328233	0.0540582
T10 193T	T10 193T	0.0126954	0.0152314	0.000981035	0.0672143	0.0188751	0.601701	0.590474	0.00295347	0.00661118	0.0123728	0.00102283	0.191195	0.000710618	0.000801488	0.0121017	0.183354	0.27287	0.00862637	0.000313277	0.00410417	0.000474126	0.118667	0.093448	0.1857	0.0042782	0.0853617	0.0132737	0.191416	0.00318151	0.0492862	0.558116	0.0101007	0.0266748	0.00283918	0.00237807	0.00122804	0.00287221	0.0132135	0.0678215	4.6247	0.0885113	0.161811	0.0133244	0.120047	0.00136516	0.012756	0.00475119	0.00932295
T10 194N	T10 194N	0.00225518	0.00326354	0.000571689	0.00878978	0.00507063	0.0158036	0.0763971	0.000856693	0.007793	0.00996693	#DIV/0!	0.0945079	0.00130812	0.00109727	0.000484942	0.0153578	0.0291617	0.00403767	0.000205012	0.000192781	#DIV/0!	0.000225903	0.016361	0.0622738	0.00122693	0.00148061	0.00237169	0.886321	0.00153594	0.0203693	0.0249263	0.00120244	0.311494	0.00254787	0.0796607	5.79073e-05	0.000576189	0.000637318	0.0110909	1.16028	0.0206535	0.0199631	0.00579589	0.0172546	0.00011173	0.000184192	0.000670126	0.102546
T10 194T	T10 194T	0.00751794	0.0220477	0.000774289	0.0672831	0.0295531	0.309911	0.3632	0.002032	0.00956851	0.0234745	0.0018026	0.355306	0.000825195	0.000196509	0.0601204	0.104238	0.305409	0.00871843	0.000718004	0.0205379	0.000229065	0.0492932	0.104372	0.601198	0.00542653	0.224811	0.00770185	0.0647616	0.023029	0.0890541	0.15839	0.0368602	0.0845649	0.0030026	0.00271135	0.00740838	0.0044029	0.0203205	0.0300045	4.51798	0.247094	0.0508998	0.00646421	0.0334009	0.000679773	0.002075	0.00279369	0.0144264
T10 195N	T10 195N	0.00166681	0.00786791	0.00210497	0.00566876	0.00846557	0.0989843	0.0652244	0.000798818	0.00271739	0.00128671	0.000133527	0.130756	0.0016542	0.0011832	0.000361873	0.025693	0.0430292	0.00157009	0.00120913	0.000246138	0.000151191	0.00162151	0.0113108	0.0486842	0.000625585	0.00222353	0.0028426	0.901254	0.00313334	0.0285578	0.0222737	0.00622907	0.149345	0.00567363	0.0260541	0.000448342	0.000383881	0.0015926	0.0217242	1.19942	0.0156578	0.0434019	0.00722694	0.0141759	0.00362272	0.0002977	0.000291739	0.0583966
T10 195T	T10 195T	0.0200292	0.0092937	0.000870533	0.0389696	0.0254525	3.78626	0.916963	0.00112377	0.0343289	0.00849794	0.00193131	0.248148	0.00185189	0.00028213	0.0639786	0.456391	0.18271	0.0061356	0.000616987	0.00513358	0.000169371	0.137761	0.144285	0.177904	0.0103484	0.118714	0.00814583	0.234684	0.0172334	0.0281105	0.434478	0.0187942	0.053285	0.00508483	0.00865265	0.00139743	0.00132639	0.0132693	0.0935072	7.88437	0.0437093	0.102371	0.0148588	0.331982	0.00281112	0.00557758	0.00428112	0.0113458
T10 213N	T10 213N	0.000485321	0.0110368	0.000500961	0.00290451	0.00151604	0.00698797	0.0864045	0.000458909	0.00569352	0.00325704	#DIV/0!	0.0516384	0.000791714	0.000231037	5.39243e-05	0.0051155	0.0219828	0.00562815	9.77599e-05	9.10519e-05	0.000102544	0.000472033	0.0273341	0.093305	0.00368279	0.00584686	0.000904878	0.622371	0.000530205	0.00428367	0.0390536	0.00648193	0.600627	0.000491148	0.041099	0.00020648	0.000489101	0.000480865	0.0142583	0.826762	0.0464365	0.00404551	0.000497172	0.00598279	0.000740692	0.000258548	0.00701655	0.0540476
T10 213T	T10 213T	0.00274602	0.0136075	0.00112578	0.10731	0.0241129	0.16903	1.23192	0.002016	0.00217575	0.0234149	0.0010947	0.373164	0.00141002	0.000676964	0.121645	0.785443	0.143747	0.0309463	4.50112e-05	0.00323583	5.67943e-05	0.299469	0.165064	1.86181	0.00616615	0.30577	0.0031803	0.135643	0.0485449	0.0845896	0.290967	0.00101437	0.129557	0.00213521	0.015784	0.00139555	0.00919745	0.00682297	0.162447	11.0521	0.188837	0.0639276	0.0120371	0.0685326	0.000807021	0.00124001	0.000344448	0.0153288
T10 219N	T10 219N	0.00173237	0.00462061	0.000465242	0.0111799	0.000682994	0.00149309	0.113986	0.0017168	0.00284995	0.0170535	0.000116939	0.0716112	0.00298608	0.000461355	0.00195422	0.0226963	0.0123914	0.00318828	0.000154924	0.000150432	0.000873522	0.00193603	0.0165905	0.0576847	0.00113455	0.00322435	0.00167709	0.562228	0.00359582	0.0173969	0.0307014	0.000517494	0.305973	0.00124395	0.0627897	0.000147184	0.0109304	0.00170689	0.0090351	0.688683	0.0265416	0.0150379	0.00434799	0.0116746	0.000149664	0.000588396	0.000687349	0.202921
T10 219T	T10 219T	0.0339002	0.00755673	0.000449293	0.014025	0.00446831	1.07829	0.576214	0.000920369	0.015026	0.00755897	0.000319162	0.163548	0.000874618	6.74422e-05	0.0341065	0.300279	0.126937	0.00544264	0.000845177	0.00719125	0.000195851	0.056444	0.0459877	0.0721229	0.00391778	0.0435908	0.00669023	0.454467	0.0148543	0.0364303	0.403181	0.00094217	0.14546	0.00737644	0.0377153	0.000630293	0.00316617	0.0229887	0.0316685	2.93829	0.0123986	0.0886748	0.0068316	0.0764874	0.00030332	0.00616316	0.000887765	0.0982902
T10 236N	T10 236N	0.000995576	0.00443631	0.000321063	0.0107243	0.00131499	0.0146298	0.023001	0.000310161	0.000467044	0.00140196	5.61548e-05	0.0563535	0.000759444	0.00140474	0.000153974	0.00994382	0.024147	0.003624	0.000113573	6.6744e-05	0.000291878	0.000202431	0.0279231	0.0224336	0.000486394	0.000849102	0.00220121	0.611588	0.00319219	0.0191341	0.011032	0.000311382	0.102075	0.00341931	0.0181495	0.000115148	0.000114551	0.00107473	0.0135206	0.570831	0.00110253	0.0268997	0.0102889	0.00578457	0.000404485	0.000198239	7.65568e-05	0.01643
T10 236T	T10 236T	0.0227926	0.0118329	0.000738795	0.0614104	0.0111404	0.260735	0.165909	0.000543118	0.0145196	0.00519278	0.000700944	0.18217	0.0001116	0.000769625	0.0238286	0.149121	0.152794	0.00462987	0.00024923	0.00215746	0.000360119	0.0262305	0.112123	0.295849	0.00139503	0.106444	0.00355182	0.113153	0.00375193	0.00246726	0.110469	0.0307201	0.0162352	0.00211795	0.043533	0.00137033	0.000974894	0.00304607	0.0162008	2.72117	0.0422622	0.0391156	0.0178401	0.0159848	0.00264853	0.00135268	0.000165715	0.00296629
T10 246N	T10 246N	0.0123116	0.0050711	0.000610004	0.00295266	0.00043012	0.00359768	0.012193	0.000193565	0.000790864	0.000986462	5.75724e-05	0.0528049	0.000736895	0.00153188	0.000188215	0.00578168	0.0172781	0.00152123	7.30457e-05	#DIV/0!	#DIV/0!	#DIV/0!	0.00784487	0.0152563	0.00136751	0.00303845	0.000754171	0.747788	0.0026852	0.0251655	0.00768914	0.000110402	0.0731473	0.00240925	0.00911902	0.000899665	0.000456059	0.00109919	0.00756868	0.440011	0.0116642	0.0207735	0.00595613	0.00259862	9.81978e-05	0.000134572	2.92951e-05	0.0195782
T10 186N	T10 186N	0.00106456	0.000844457	1.92856e-05	0.00775383	0.000391936	0.00137148	0.0977366	0.000158076	0.00164127	0.00250676	6.0828e-05	0.0521179	0.00127981	0.000174239	0.000528855	0.00379111	0.0187899	0.00310601	3.66002e-05	0.000178472	#DIV/0!	0.000675687	0.021238	0.0536236	0.000241851	0.000997704	0.00097474	1.97911	0.00104017	0.00841198	0.0370738	0.000242737	0.407061	0.000513419	0.115846	0.000279001	0.00744072	0.000172985	0.0114559	0.812827	0.00165141	0.00465045	0.00168023	0.00693107	0.00016186	7.39056e-05	0.000108544	0.0694037
4N	4N	0.000320264	0.000310005	3.58585e-05	0.0025232	0.000517309	7.023e-05	0.0204543	0.000116945	0.000390257	0.00331611	7.97997e-06	0.0102217	0.000302522	6.3282e-05	0.000306511	0.00101958	0.0127748	0.000657444	1.39349e-05	6.28403e-05	7.99526e-06	4.88758e-05	0.00544884	0.0256265	0.000199493	0.00191092	0.000356626	0.204192	0.000219499	0.00380808	0.00596923	1.80107e-05	0.0887519	0.000189983	0.00641775	2.2576e-05	0.000121632	0.000157266	0.00397983	0.163735	0.000531213	0.00164735	0.00101491	0.00187988	7.07658e-05	8.08316e-05	3.80665e-05	0.0226818
10T	10T	0.00497996	0.00527337	0.000296975	0.0256342	0.00273796	0.0571631	0.018871	0.000429771	0.00240497	0.00396649	0.000224429	0.0255431	0.000308342	0.00051406	0.00747663	0.010459	0.065179	0.00211197	0.000187862	0.000863328	3.40083e-05	0.0101571	0.019583	0.0127575	0.00131653	0.019232	0.00240706	0.0776696	0.00431818	0.0108295	0.0386997	0.00230974	0.0112121	0.0019582	0.0026921	0.000328279	0.000170787	0.00283341	0.0103682	0.345705	0.00540664	0.0664323	0.00222855	0.020102	0.000112284	0.000556956	0.000206202	0.00595018
10N	10N	0.000261145	0.00182233	0.000188154	0.00593016	0.00173111	0.00170426	0.00265747	0.000224138	0.000295545	0.00117023	8.8774e-06	0.0122362	0.000312367	0.000581062	3.77709e-05	0.00109193	0.0189606	0.00111543	0.000135571	9.78132e-05	1.48849e-05	2.78692e-05	0.0021319	0.00325887	0.000321883	0.000652589	0.00103089	0.208327	0.000997312	0.00424797	0.00321861	8.79627e-05	0.02307	0.00266448	0.00701079	3.09175e-05	5.8975e-05	0.000705943	0.0040876	0.0983411	0.00426404	0.0193397	0.00123829	0.00132031	0.000140283	6.51384e-05	1.67278e-05	0.0121471
16N	16N	0.000585307	0.00221287	0.000101042	0.00590999	0.00107588	0.00417026	0.0126076	0.000112594	0.000816799	0.00247001	7.01638e-05	0.0152481	0.000209318	3.66073e-05	0.000408549	0.00389429	0.0224647	0.00183828	4.94364e-05	0.00012177	0.00677624	0.00084621	0.0109139	0.0162766	0.000464833	0.00259804	0.000672938	0.813697	0.000359574	0.00312869	0.0305249	0.00149573	0.0737938	0.000370803	0.018757	4.49745e-05	0.000134943	0.00118441	0.0053976	0.191803	0.00157029	0.00730457	0.000718301	0.00202688	0.00011105	0.00013073	0.000146676	0.0266568
16T	16T	0.00100887	0.00248136	0.000244816	0.0125773	0.00604047	0.142626	0.0914442	0.00052254	0.00368071	0.013134	0.000190597	0.0652537	0.00033819	0.000257468	0.00703733	0.0799633	0.0782915	0.00529663	0.000566912	0.00153951	6.15913e-05	0.0263283	0.0522779	0.0203887	0.000987601	0.0124271	0.00169302	0.0255192	0.00216134	0.0215392	0.20319	0.000855931	0.00586731	0.00164403	0.000328528	0.00130374	0.000173609	0.00339936	0.0255444	1.11462	0.00571702	0.0649126	0.00203902	0.0535991	9.4873e-05	0.00142478	0.000688738	0.00174636
35N	35N	0.000357922	0.000618926	1.85156e-05	0.00406908	0.000702079	0.0505935	0.0139855	0.00019219	0.000455232	0.00106847	2.64028e-05	0.00935387	0.000277468	5.17271e-05	0.000208786	0.000760007	0.0167546	0.000727739	0.000101417	4.49649e-05	1.14578e-05	8.87124e-06	0.00601566	0.00336027	0.000593776	0.00109018	0.00120168	0.97955	0.000754959	0.00214697	0.00867968	0.000153225	0.0621688	0.000483267	0.0222744	2.17958e-05	0.000108472	0.000494696	0.00420372	0.128232	0.000273727	0.00889186	0.00275607	0.00150146	4.60779e-05	9.95804e-05	9.00196e-05	0.0532873
36N	36N	0.000780655	0.00115736	3.60021e-05	0.00922453	0.0026585	0.0104948	0.0386569	0.000140635	0.00105425	0.00377705	8.92281e-05	0.0235023	0.000232602	8.74975e-05	0.0031786	0.0189958	0.0167798	0.0012647	8.65901e-05	0.000278683	7.25015e-06	0.00409195	0.00824415	0.0301103	0.000649922	0.0102298	0.00110739	0.265762	0.00222638	0.00522771	0.0240974	7.5353e-05	0.0496447	0.000571102	0.0104662	7.97213e-05	0.000428419	0.000775419	0.00788968	0.302693	0.00255282	0.00627856	0.00188025	0.00289068	8.72329e-05	0.00013518	2.99576e-05	0.0223316
4T	4T	0.00332214	0.0101	0.000263157	0.0403999	0.017148	0.121793	0.101212	0.000536118	0.00312416	0.0113638	0.000916851	0.046618	0.00047765	0.000240005	0.00942834	0.0640819	0.122742	0.00333853	0.000289391	0.00308246	2.8789e-05	0.0294476	0.0389737	0.0469908	0.00363695	0.0819631	0.00292592	0.00492964	0.00197789	0.0242886	0.0764571	0.000243948	0.0144913	0.000737585	0.000563523	0.00134378	0.00142051	0.00737622	0.0155839	1.39489	0.0168304	0.0444007	0.00635793	0.00638968	0.000282818	0.00117137	0.000219444	0.00395145
36T	36T	0.00267246	0.00472062	0.00013939	0.0248389	0.0196197	0.0275234	0.147989	0.00072098	0.00341182	0.0105222	0.000526691	0.0982925	0.000359411	0.000159408	0.0226989	0.11182	0.0429838	0.00459679	0.000338591	0.000943269	3.78018e-06	0.0320924	0.0282737	0.200619	0.00183111	0.0696889	0.00350683	0.194085	0.00834528	0.0232519	0.0437697	0.000128616	0.0391349	0.00140576	0.00386693	0.000521527	0.00183933	0.0034117	0.0294854	1.31081	0.0206838	0.022033	0.0361659	0.00621886	0.000161385	0.000218481	4.50088e-05	0.0120045
34N	34N	0.000145075	0.00137048	5.93384e-05	0.00176889	0.000592077	0.0243599	0.00586338	9.47484e-05	0.000658533	0.0017453	1.90295e-05	0.00933417	9.24847e-05	0.000113958	0.000314969	0.00295818	0.00971409	0.00117025	2.39745e-05	0.000138144	2.52174e-05	8.78551e-05	0.00340376	0.00431346	0.00045991	0.000467077	0.00110019	0.103593	0.000708367	0.00327482	0.00631719	0.000267672	0.0101355	0.00104061	0.00112032	3.88288e-06	3.69578e-05	0.000789555	0.00407929	0.140473	0.000573881	0.0112459	0.00304874	0.0016045	0.000150388	0.00014075	5.13296e-05	0.00758246
34T	34T	0.000529014	0.00191258	0.000104735	0.00382987	0.0016004	0.128413	0.0476545	0.0002159	0.000786651	0.00118343	0.000115817	0.0202465	0.000168647	0.000320316	0.00240531	0.0173477	0.0295788	0.00125692	7.01692e-05	0.00048199	3.80779e-06	0.00494089	0.00891584	0.0129134	0.000945572	0.00320806	0.00346911	0.137517	0.000935669	0.00528176	0.041279	0.000530669	0.0175071	0.00132603	0.00279003	3.87686e-05	0.000315532	0.00136425	0.011969	0.397891	0.000627456	0.0319318	0.00531785	0.0132479	0.000131323	0.000538856	0.000158264	0.0145494
35T	35T	0.096828	0.000971328	0.000134643	0.00222967	0.0019639	1.50905e-05	0.00645917	0.000275235	0.000266144	0.00337419	0.000767469	0.0034156	0.000146983	0.00072012	0.00263036	0.00145435	0.0347506	0.000800185	2.43365e-05	0.000182407	1.01523e-05	4.22367e-05	0.0219888	0.00462358	0.00787846	0.00219097	0.00512413	0.000286152	0.170604	0.00271034	0.0836216	7.19372e-05	0.00105254	0.00382042	5.30579e-06	1.7461e-05	9.5538e-05	0.00144821	0.0226253	0.0548742	0.000533105	0.104312	0.00467182	0.00355505	2.76895e-05	0.000283742	0.00022522	0.00516982
32N	32N	0.000153527	0.00399224	9.75032e-05	0.00387584	0.000750819	0.046732	0.00783589	0.000117065	0.000159612	0.000541931	7.25408e-05	0.0140332	0.000180002	0.000303971	0.000377616	0.00362442	0.0318556	0.00143678	0.000223684	5.21714e-05	1.25085e-05	0.000113737	0.00625424	0.00364826	0.000401867	0.000474753	0.00319116	0.19111	0.00080748	0.00347639	0.0103137	0.000156242	0.0148085	0.000829498	0.00269431	1.27176e-05	7.19041e-05	0.00123155	0.0102532	0.219387	0.000364755	0.0178531	0.00661918	0.00261672	7.01414e-05	0.00013371	8.76531e-05	0.0126615
33N	33N	0.000392051	0.000634061	6.99578e-05	0.00641357	0.00081346	0.0209404	0.0243696	0.000123572	0.000606114	0.00529682	3.55634e-05	0.0166866	0.000280088	0.000108849	0.00047457	0.00140516	0.0197818	0.00135074	0.0001184	0.00017021	5.87882e-05	0.000168909	0.00566245	0.0100148	0.000742724	0.00130528	0.000913011	0.750329	0.000453544	0.00332623	0.019133	7.13782e-05	0.0962787	0.00123795	0.0169964	9.51339e-06	0.000183483	0.000584021	0.0129054	0.26126	0.000381647	0.00570415	0.00158154	0.00563752	6.90316e-05	7.93018e-05	0.000491932	0.0223454
33T	33T	0.000185585	0.0027826	0.000610562	0.0046354	0.00117475	0.169646	0.00756592	0.000571283	0.000443719	0.0092691	0.000406704	0.00697321	0.000159217	0.000644138	0.000188424	0.00468471	0.0632939	0.00151143	0.00108211	0.00125033	3.92644e-05	0.00298787	0.00402006	0.000897046	0.00148909	0.0013149	0.00369467	0.0313403	0.00447633	0.00154263	0.0528283	0.0387509	0.00366019	0.00743106	0.00305742	1.98661e-05	0.000147144	0.00140671	0.00481298	0.150431	0.00089011	0.0356028	0.0185064	0.015708	0.000115788	0.000795394	0.00344166	0.00270882
29N	29N	0.000296373	0.00143424	0.000242037	0.00694577	0.00118806	0.000958272	0.017302	6.89603e-05	0.00261421	0.00545979	5.54589e-05	0.0128862	0.000215293	0.000129023	0.000670427	0.00257715	0.0169212	0.00173037	2.15323e-05	8.1244e-05	4.19269e-05	9.59211e-05	0.00319883	0.00450663	0.000761536	0.00234816	0.00180247	0.839217	0.000752633	0.00597917	0.0123107	0.000125061	0.054167	0.000286327	0.00746516	1.17897e-05	0.00023795	0.0013954	0.00762302	0.276972	0.000289928	0.00580195	0.0039274	0.00219298	4.40652e-05	9.94095e-05	7.54264e-05	0.0340404
30N	30N	0.000222493	0.000303599	1.33729e-05	0.00593282	0.00053808	0.000431694	0.0262599	0.00017461	0.00067277	0.00220229	1.6083e-05	0.00912268	0.000303859	4.65252e-05	8.24233e-05	0.00144591	0.0219148	0.000699424	2.42732e-05	5.68091e-05	1.09811e-05	8.76071e-05	0.00140696	0.0219769	0.000480331	0.001456	0.00064455	0.201397	0.000399195	0.00307787	0.00901649	9.55514e-05	0.114794	0.000234737	0.0139927	4.97048e-05	0.000189421	0.000269647	0.00548631	0.157657	0.000353145	0.00383164	0.000798761	0.00335126	3.71639e-05	0.000134491	4.04429e-05	0.0230375
30T	30T	0.00101021	0.00311946	0.000122133	0.017424	0.00748611	0.0703451	0.0690311	0.000336685	0.000730157	0.00657454	0.000238393	0.026679	0.000237061	0.000140916	0.00979521	0.0208857	0.0312588	0.00253264	9.37114e-05	0.000569897	2.26262e-05	0.0110127	0.0101119	0.0470758	0.00191402	0.0198283	0.00180513	0.117428	0.00295928	0.00624733	0.0385786	0.00205889	0.0738531	0.00114623	0.00930168	0.000253224	0.000534022	0.00259983	0.0212738	0.797006	0.00790589	0.0254991	0.00353069	0.0108063	0.000233967	0.000658242	0.000129788	0.00999717
31N	31N	0.000849607	0.00171053	0.000109271	0.00425051	0.00325135	0.227022	0.07449	0.000192689	0.00130235	0.00267583	0.000108739	0.0200893	0.000237876	0.000127742	0.000554577	0.0550487	0.0352289	0.00135604	0.00017404	0.000649835	2.00123e-05	0.00884602	0.0102214	0.0210903	0.00102306	0.00455045	0.00485858	0.176113	0.00133954	0.00591225	0.0719887	0.000704628	0.0377363	0.0010447	0.00563873	0.000158318	0.000320271	0.00211126	0.00960663	0.373957	0.000568228	0.0223192	0.0125863	0.0079087	0.000307096	0.000842043	0.000211347	0.0134729
31T	31T	0.000152059	0.000490004	2.15749e-05	0.00398482	0.000580849	0.0042604	0.0188752	8.422e-05	0.000784908	0.00186844	3.2191e-05	0.00785881	0.000184351	0.000126074	5.7471e-05	0.00174592	0.00896666	0.000932397	2.34289e-05	4.59534e-05	4.86589e-06	0.000125205	0.00440879	0.0197821	0.000377165	0.00144109	0.000527495	0.404774	0.000631957	0.0029657	0.0280779	2.82007e-05	0.0690901	0.000213234	0.0109496	3.77379e-05	0.000205375	0.000478919	0.0069423	0.128332	0.000348402	0.00335332	0.00123206	0.00156242	0.000101633	3.74724e-05	4.46465e-05	0.0285623
32T	32T	0.00156029	0.0033894	0.000108264	0.00294262	0.00151219	0.0851662	0.0414885	0.000140977	0.000611908	0.00150119	0.000344676	0.024741	0.000179614	0.000258063	0.0035063	0.0157992	0.0332437	0.00163768	0.000196977	0.00052451	4.96818e-05	0.00638914	0.0108668	0.0113702	0.000772569	0.00467944	0.00422677	0.215931	0.000852737	0.00405145	0.0392635	0.000915978	0.0179465	0.00100937	0.002905	5.59115e-05	0.000241467	0.00226973	0.0124509	0.47451	0.0013795	0.026489	0.00617857	0.0142046	0.000229843	0.000461458	0.000106983	0.0123298
28N	28N	0.000443532	0.00113317	0.000197532	0.00251621	0.00106598	0.0147076	0.0111725	7.69668e-05	0.000362403	0.00100277	9.86559e-05	0.0136273	0.000189373	0.000111308	0.000170945	0.00463616	0.0126219	0.000731157	3.31155e-05	7.09726e-05	5.42057e-06	0.000141089	0.00190228	0.0038051	0.000331025	0.000762278	0.00198069	0.360335	0.00118687	0.00558759	0.0131197	5.34022e-05	0.0304368	0.000765628	0.0076745	3.3529e-05	5.86845e-05	0.000696834	0.00489597	0.129546	0.000115345	0.0112862	0.00305687	0.00279519	0.000801469	0.000134553	1.08832e-05	0.0196013
28T	28T	0.000254267	0.00120792	7.31721e-05	0.00146434	0.000729769	0.0174347	0.017031	7.07639e-05	0.000922563	0.000659725	0.000209292	0.0138269	0.000105623	0.000170612	0.000392487	0.00584841	0.0229286	0.000562896	8.38939e-05	0.00016408	1.28044e-06	0.000478762	0.00282605	0.0037704	0.000559485	0.00101377	0.00152537	0.272858	0.00131785	0.00445992	0.00972389	9.06992e-05	0.0237525	0.000836945	0.00541068	5.40342e-05	7.97888e-05	0.000893101	0.0044871	0.262736	0.000226161	0.0102628	0.00457135	0.0021402	0.000238186	0.000110151	4.6386e-05	0.0158216
29T	29T	0.00484536	0.00615202	0.000124995	0.0156958	0.00781821	0.472229	0.127618	0.000437805	0.00525612	0.0082066	0.000536527	0.0393432	0.000193039	0.000213007	0.016167	0.0723996	0.0490996	0.00381236	0.000191224	0.00088731	4.59025e-05	0.0178458	0.0289812	0.0633824	0.00295914	0.0306364	0.00431682	0.00165143	0.00149866	0.00816872	0.0808678	0.0349368	0.00612337	0.000925478	7.99378e-05	0.000483055	0.00147591	0.00586702	0.0357122	1.14174	0.0117856	0.0514979	0.00858406	0.037301	0.000463187	0.00236814	0.000413138	0.000995064
T11 065N	T11 065N	0.000325085	0.00244788	0.00028833	0.00508152	0.00124388	0.0865202	0.0236048	0.00051032	0.00180856	0.00190967	0.000313582	0.0351245	0.000475771	0.000605787	9.91174e-05	0.00712163	0.0223091	0.00144184	2.67989e-05	5.8011e-05	1.56266e-05	0.000433227	0.0114902	0.00683304	0.000573862	0.000301305	0.00192128	0.316295	0.000725543	0.00584221	0.0102577	0.000532007	0.0626794	0.00183634	0.0342648	0.000139834	6.12533e-05	0.000781257	0.00893657	0.823888	0.000616805	0.0127391	0.00447248	0.0029323	0.000249497	0.000197823	6.71569e-05	0.0234522
T11 065T	T11 065T	0.00334171	0.00658662	0.00016467	0.0294779	0.013775	0.68905	0.226677	0.000477917	0.00227919	0.00964578	0.000657429	0.0866914	0.000337736	0.000887852	0.0248122	0.0601231	0.0829167	0.002002	9.26259e-05	0.00103205	0.000231988	0.0304476	0.0846194	0.123228	0.00274011	0.0161645	0.003905	0.0145124	0.000774332	0.0128842	0.221019	0.0408774	0.00935403	0.00187604	0.00132911	0.00128566	0.000364098	0.00847	0.0324523	3.11684	0.0294474	0.044293	0.0150356	0.0642393	0.000621872	0.00317984	0.0023085	0.00353948
T11 083N	T11 083N	0.000836925	0.00170187	0.000158357	0.0143036	0.000483595	0.00399114	0.0682373	0.000389266	0.00203162	0.00579653	3.63787e-05	0.0477993	0.00121665	0.000398247	0.000451577	0.00791268	0.0307132	0.00129893	0.000187656	7.04865e-05	2.78807e-05	0.00205502	0.00591441	0.0471465	0.0016378	0.00207142	0.00166958	1.06558	0.00100763	0.00626145	0.028369	0.000202682	0.225297	0.00084345	0.0590372	0.000275188	8.39519e-05	0.000419102	0.0149476	1.00625	0.00160075	0.00601282	0.00121028	0.00753775	0.000683235	0.000208399	0.000150606	0.0533538
T11 083T	T11 083T	0.00825406	0.00699141	0.000231418	0.0258709	0.00631567	0.643403	0.309373	0.000436358	0.00410855	0.00369939	0.000556691	0.0914852	0.0004849	0.000278937	0.0267487	0.102167	0.104997	0.00149113	9.62829e-05	0.0032437	6.10543e-05	0.0613915	0.0484264	0.05466	0.0031534	0.0166916	0.00352445	0.0629636	0.00444598	0.0130988	0.204097	0.00322169	0.0190939	0.00208933	0.00361873	0.000358641	0.000649609	0.00416853	0.0245787	0.0395651	0.000145563	0.0435425	0.011464	0.08555	0.000113276	0.00263724	0.000823343	0.00525737
T11 084N	T11 084N	0.000996601	0.00970123	0.00037557	0.00741938	0.000897263	0.0116899	0.0360507	0.00115267	0.00139294	0.00379839	#DIV/0!	0.0593839	0.00127075	0.00185769	0.000410204	0.020214	0.062455	0.00202153	0.000554318	0.000100364	0.000192128	0.000427133	0.0209827	0.0316398	0.00306318	0.000551023	0.00203849	0.154201	0.00112737	0.015468	0.0150502	0.0037871	0.104129	0.00174935	0.0127533	8.69307e-05	0.000290835	0.000680769	0.00940066	0.619605	0.00503649	0.0284951	0.00385094	0.00726171	0.000321647	5.10995e-05	0.000121305	0.0106383
T11 084T	T11 084T	0.00265801	0.00171765	0.000189573	0.00749397	0.000887315	0.349666	0.160876	0.000473593	0.00196232	0.00201424	0.000181736	0.0407819	0.000271654	0.000414257	0.00534495	0.0731772	0.0674704	0.00127547	0.000154138	0.000295243	5.77189e-05	0.0233766	0.0253332	0.0163391	0.00134586	0.00346791	0.00184164	0.0941105	0.00105405	0.00657393	0.113318	0.00164323	0.0366017	0.00202035	0.00386331	0.000305142	0.000171335	0.00154052	0.00915765	0.89069	0.00205285	0.0242977	0.00296223	0.0510218	0.000384497	0.000869164	0.000239043	0.00835072
T11 085N	T11 085N	0.000848735	0.00131636	0.000186228	0.0134389	0.000962759	0.00843342	0.106299	0.000263731	0.00226938	0.00388669	0.000316415	0.0646547	0.00152756	0.000555639	0.000242654	0.00937857	0.0308823	0.00186763	0.000941768	8.46603e-05	0.000125178	0.000281868	0.0167947	0.0491456	0.000601031	0.00378499	0.00141123	0.483897	0.000844651	0.0110688	0.0331603	0.000262596	0.293453	0.00109912	0.0337612	0.000200057	9.01863e-05	0.0010445	0.0145995	1.11885	0.00187226	0.00923692	0.00214636	0.0122286	0.000268013	0.000192567	0.000347052	0.0378181
T11 085T	T11 085T	0.00178752	0.00509419	0.000237706	0.0156499	0.00102382	0.0309344	0.146753	0.000231772	0.00214752	0.00471339	0.000252419	0.0858368	0.00121105	0.000315628	0.00175968	0.0152877	0.0286488	0.00237184	0.000154777	0.0003652	#DIV/0!	0.00434339	0.0297427	0.0493577	0.000403323	0.00652575	0.00145237	0.492897	0.00135715	0.018517	0.05473	0.000400582	0.366811	0.00100701	0.0234996	0.000327954	0.00180546	0.000535251	0.0224904	1.10493	0.00231558	0.010812	0.00220979	0.020452	0.000208892	0.000245892	0.000145917	0.036285
T11 107N	T11 107N	0.00342228	0.00215559	0.000431327	0.0191836	0.000958036	0.00529264	0.0613831	0.000796604	0.00598185	0.0200945	5.22078e-05	0.0813185	0.00207528	0.00102692	0.000398808	0.0142773	0.0451064	0.00288522	0.00170604	0.000110946	0.000121267	0.00251663	0.00960036	0.0411138	0.000685389	0.0027568	0.00154211	1.16866	0.00178107	0.0115562	0.0146618	0.000228016	0.355385	0.00148642	0.064161	0.00181208	0.000326398	0.00107328	0.0137761	0.680724	0.00206495	0.0168996	0.00371706	0.0064926	0.000248357	0.000344104	0.00238113	0.0690196
27N	27N	0.000104782	0.00194156	0.000141324	0.00516157	0.000958627	0.0127989	0.0124103	0.000163785	0.000682017	0.00222105	7.04397e-05	0.021715	0.000195901	0.000383773	9.57361e-05	0.00330863	0.0236271	0.00147668	0.000144325	6.38602e-05	5.77838e-05	7.28147e-05	0.00503965	0.0071603	0.000516565	0.00180723	0.00303763	0.115805	0.000740666	0.00390688	0.00376427	0.000127205	0.0499395	0.00104058	0.00741881	0.000108972	9.73957e-05	0.00201631	0.00843856	0.213147	0.000936685	0.0151926	0.00667398	0.00217393	0.000269941	0.000243093	7.14559e-05	0.0145809
27T	27T	0.000920456	0.00346243	0.000272465	0.00642166	0.00136088	0.028148	0.0320665	0.000131939	0.00140554	0.00455658	0.000256211	0.0241241	0.000251049	0.000436001	0.00130043	0.0163566	0.0431901	0.002527	6.21363e-05	0.000476438	4.0273e-05	0.00321459	0.00731943	0.011828	0.000854146	0.00466831	0.00454817	0.0571283	0.00106775	0.00493714	0.0180361	0.000222655	0.0366453	0.00141669	0.00632466	0.000176181	0.000211236	0.00127578	0.0132226	0.269727	0.00172072	0.0325682	0.00975256	0.00932145	0.000169538	0.000599863	8.16537e-05	0.00733951
T11 107T	T11 107T	0.00455451	0.00785532	0.000218861	0.0190025	0.00713055	0.846467	0.416202	0.000897711	0.0085581	0.0109951	0.000285692	0.116631	0.00108484	0.000284841	0.0595869	0.222402	0.10908	0.00657237	0.000265175	0.00591582	0.000186367	0.0459034	0.0615752	0.140502	0.00305142	0.0206263	0.00307504	0.00502526	0.00114213	0.0133132	0.189486	0.00146461	0.0261124	0.00482458	0.000528017	0.000215978	0.000704025	0.00339082	0.0352835	3.03919	0.0154161	0.0420524	0.0124119	0.0457007	0.000213692	0.00189185	0.000338698	0.00232202
T11 046N	T11 046N	0.000876658	0.00634831	0.000115314	0.0075418	0.0019349	0.00902175	0.0488945	0.000157785	0.00310766	0.00735121	0.000408098	0.0526287	0.000480428	0.000664904	0.00118122	0.00678615	0.0189394	0.00178277	0.000101752	0.000179728	0.00013461	0.00035007	0.0519924	0.024503	0.000464553	0.00281558	0.00118097	0.811722	0.000472164	0.0130697	0.0116749	0.00053781	0.240685	0.000909429	0.0259657	0.000144015	0.000385215	0.000558114	0.0101728	0.705516	0.00650607	0.00816181	0.00179337	0.00733371	0.000402811	9.60379e-05	5.53564e-05	0.066308
T11 046T	T11 046T	0.016389	0.0042845	0.000336122	0.0122583	0.00963168	0.6546	0.303511	0.00023836	0.00627713	0.00161741	0.00128127	0.0873959	0.00061932	0.000323928	0.0182318	0.119052	0.0873936	0.00242286	0.000231215	0.00282016	0.000111618	0.0602187	0.0635932	0.0337593	0.001755	0.0202666	0.00456076	0.00268399	0.00283924	0.0166118	0.240298	0.00581418	0.00408707	0.00419609	0.00021562	0.000286942	0.000327979	0.00816795	0.019045	2.71567	0.0152207	0.0476284	0.00513788	0.0670502	0.000220917	0.00152855	0.000514537	0.00201854
T11 047N	T11 047N	0.000697995	0.000757969	1.89894e-05	0.00627318	0.00083205	0.00215804	0.0750991	0.000114167	0.00296252	0.00524885	0.000138521	0.0486421	0.000714589	7.9802e-05	0.000394106	0.00434765	0.0137174	0.00214545	7.13333e-05	0.000459647	6.66932e-05	0.000510712	0.0122201	0.0667718	0.000345428	0.00215084	0.000878554	0.886642	0.00130384	0.00790725	0.0323099	0.000386928	0.273858	0.000498571	0.0370174	7.99814e-05	0.000327417	0.00049722	0.00944424	0.811142	0.00266	0.00265921	0.00103987	0.0106136	0.000235243	8.94286e-05	0.000257309	0.0320158
T11 040N	T11 040N	0.00115216	0.00137233	0.000139908	0.0078117	0.000829743	0.00920624	0.0378154	0.000147234	0.0026068	0.00373736	0.000248499	0.0280111	0.00085001	0.000226797	0.00016634	0.00345056	0.013182	0.00107384	0.000118653	2.09724e-05	0.000110252	0.000145696	0.0141022	0.0186232	0.000643915	0.000468267	0.00109538	0.299536	0.00137243	0.00505236	0.0158734	0.000412485	0.142282	0.00129379	0.0325455	4.03226e-05	0.00014649	0.000630918	0.00852891	0.448144	0.00145922	0.0102693	0.00419437	0.00500751	5.67336e-05	0.000202508	8.46608e-05	0.051291
T11 040T	T11 040T	0.0137382	0.0066008	0.00022049	0.0197137	0.00619802	0.160044	0.311849	0.000292133	0.00554425	0.00389983	0.00108538	0.0654223	0.000429967	0.000621883	0.014689	0.057513	0.0828802	0.00155931	7.82554e-05	0.00240716	0.000124337	0.0361635	0.0602537	0.0415709	0.00233936	0.0107781	0.00371485	0.000830216	0.0010415	0.00878191	0.174277	0.00420814	0.00475307	0.00331057	0.000129707	0.00102134	0.000381853	0.0044649	0.0163724	1.86219	0.00626351	0.0344989	0.00864848	0.0438359	0.000142752	0.00226718	0.000824673	0.00120399
T11 047T	T11 047T	0.00234817	0.0138314	0.000400425	0.0514786	0.0101687	0.373683	0.364838	0.000821358	0.00193347	0.0135356	0.000683327	0.152782	0.00109887	0.000509692	0.085107	0.141653	0.0827517	0.00666129	0.000266798	0.00376673	0.000350028	0.0454165	0.1105	0.392123	0.00212485	0.0846148	0.00354232	0.281355	0.00563606	0.0285818	0.130552	0.0067737	0.0826255	0.00229958	0.0113939	0.000575849	0.00073619	0.00743588	0.0603454	4.77704	0.0452194	0.0550939	0.0133001	0.0728181	0.000898058	0.00274884	0.000622232	0.0106949
T11 011T	T11 011T	0.0114506	0.00747367	0.000390037	0.0184585	0.00632024	0.857341	0.374177	0.000229363	0.00763329	0.00709815	0.000313352	0.114367	0.0012009	0.000970782	0.00418163	0.335692	0.0741882	0.00344376	0.000544704	0.00105813	6.64266e-05	0.0500641	0.10098	0.0805387	0.00156015	0.0135564	0.00181104	0.00203739	0.00366981	0.0237284	0.173654	0.00231485	0.0284839	0.00379383	0.000247488	0.000187998	0.000909919	0.00331499	0.0163542	2.84113	0.00504194	0.0511916	0.0108847	0.0829916	0.0013638	0.00326733	0.000540548	0.00183945
T11 041N	T11 041N	0.00410336	0.00517066	0.000198332	0.0126686	0.00286189	0.102738	0.159708	0.000333986	0.00550117	0.018482	0.00272658	0.0881969	0.00135125	0.00182969	0.00603341	0.119402	0.063482	0.00333855	0.000336045	0.000593804	0.000224234	0.0214436	0.0393513	0.0359917	0.00156436	0.00840876	0.00509847	0.437502	0.0151548	0.0157082	0.342386	0.00244473	0.071427	0.0012909	0.0208692	0.000386645	0.000234551	0.00211729	0.0107415	1.85977	0.00500718	0.0512572	0.0049483	0.0589299	0.000266779	0.00322253	0.00119679	0.0231271
T11 041T	T11 041T	0.0132521	0.0104486	8.95556e-05	0.0297734	0.0139132	0.206564	0.844516	0.000792267	0.0176685	0.026129	0.00185543	0.374432	0.00123655	0.000100113	0.0386041	0.59905	0.13961	0.0202678	0.000567152	0.00875114	0.00030606	0.104642	0.208616	1.396	0.00176087	0.136749	0.00236569	0.0299201	0.0132899	0.119965	0.244515	0.104662	0.00822999	0.000843917	0.000528218	0.000856756	0.00210677	0.00288862	0.0849499	8.1583	0.138574	0.0416488	0.00358758	0.0404661	0.00501013	0.00318239	0.000345183	0.00276405
T11 005N	T11 005N	0.000462843	0.00211905	0.000112397	0.002271	0.000951654	0.00197943	0.0771233	0.000459309	0.00181494	0.00395879	4.94464e-05	0.0398812	0.0013963	0.000220294	0.000136762	0.00215845	0.0166897	0.000684823	0.000142078	0.00017359	#DIV/0!	0.00015156	0.0350038	0.032705	0.000367961	0.00629459	0.00150561	1.19927	0.000634902	0.00680986	0.0181041	0.000185108	0.415046	0.000534702	0.0531991	0.000483105	0.000169978	0.00018186	0.0132341	0.645673	0.0028711	0.00318026	0.000867082	0.0064794	0.000122602	3.47019e-05	0.000265932	0.136311
T11 005T	T11 005T	0.00010596	0.00304322	0.000113609	0.0425064	0.00644273	0.0024656	0.154526	0.000604161	0.00662401	0.0218452	0.00141313	0.103332	0.000567326	0.000295554	0.0545437	0.0119865	0.131036	0.00463129	0.00176692	0.0102842	2.42091e-05	0.0384746	0.15473	0.372637	0.000398275	0.0711188	0.00268718	0.0549655	0.0366905	0.0248727	0.144645	0.000286075	0.160367	0.00138521	0.00307982	0.00180732	0.000184798	0.00131078	0.0534483	4.07548	0.125458	0.0317808	0.00796157	0.255944	0.00127207	1.94616e-05	0.000102122	0.00311639
T11 007N	T11 007N	0.0015014	0.00343838	0.000436163	0.0173763	0.000598607	0.0325671	0.0672432	0.000311266	0.00207991	0.00742145	0.000123341	0.0825538	0.000326977	0.000583697	0.000136545	0.0201105	0.0250961	0.00390119	0.000437573	0.000161119	0.000174794	0.000509452	0.00720854	0.014938	0.000562133	0.00280597	0.00119443	1.18913	0.00132457	0.0123698	0.0189969	0.000508278	0.135667	0.00107771	0.0623612	0.000156566	0.000353582	0.000314727	0.00904117	1.13613	0.00293027	0.0120949	0.00264094	0.0086928	0.00163232	6.32827e-05	0.000192326	0.0381887
T11 007T	T11 007T	0.0109549	0.00838692	0.000548255	0.0283014	0.014547	0.455575	0.504742	0.0010123	0.00801272	0.00609926	0.000481333	0.213332	0.00118363	0.00198015	0.0196208	0.178179	0.109643	0.00364403	0.00154391	0.00346118	0.000141272	0.0517269	0.0781265	0.0702358	0.00288347	0.0315559	0.00544307	0.00188297	0.00370985	0.0220195	0.154701	0.00832686	0.0202886	0.00267636	0.000168002	0.00153652	0.000567679	0.00503938	0.0206632	2.94303	0.0151102	0.0679454	0.00675178	0.133629	0.000709128	0.00256876	0.000799046	0.00416573
T11 009N	T11 009N	0.00147219	0.00109726	0.000394161	0.0114548	0.0540857	0.00090442	0.0676748	0.000859952	0.002973	0.00635034	0.000556948	0.0448572	0.0014198	0.000337466	0.000143624	0.00376949	0.0171632	0.00124119	0.000590224	0.000188208	0.00130364	0.000219101	0.0184754	0.0287912	0.000803578	0.00435515	0.00106225	1.6037	0.00172449	0.012594	0.0141132	0.00023844	0.389034	0.00218855	0.044192	0.000105245	0.00611927	0.00032158	0.0221483	0.971761	0.0023008	0.00930827	0.00109486	0.00849432	0.00012724	0.000110642	0.00010523	0.0811095
T11 009T	T11 009T	0.00666886	0.00913853	0.000793502	0.0536276	0.00935961	0.328	0.413623	0.00105164	0.0032641	0.00884557	0.000504359	0.166178	0.0014241	0.000473353	0.0618058	0.185318	0.0737178	0.00441631	0.000154632	0.00191755	0.000340571	0.0540567	0.108248	0.085978	0.00346728	0.0318492	0.00323426	0.254753	0.0210525	0.0191414	0.162508	0.0058314	0.103679	0.00245789	0.00999897	0.000793759	0.00222756	0.00535593	0.036641	3.92853	0.0521387	0.0512499	0.00370044	0.0736325	0.001403	0.00158348	0.000729281	0.0144633
T10 276T	T10 276T	0.019964	0.00584923	0.000475014	0.0122585	0.00689266	0.463187	0.288877	0.000910224	0.00968602	0.00617203	0.00052815	0.0909404	0.000716999	0.000696863	0.0147298	0.117845	0.0716194	0.00344032	0.000523823	0.00184344	0.000407277	0.0499653	0.063163	0.127452	0.00171882	0.0261617	0.00381933	0.0479723	0.0320653	0.0145296	0.247122	0.0025392	0.0197989	0.00258756	0.00141674	0.000324524	0.000935499	0.00428423	0.0279996	2.44862	0.0188636	0.0610125	0.00456268	0.0992814	0.000138542	0.00125231	0.000441115	0.00308553
T10 288N	T10 288N	0.000113151	0.00147741	0.00036725	0.00447572	0.00120729	0.0208555	0.0292377	0.000432637	0.00579837	0.00126122	0.000109107	0.057407	0.00178203	0.000798843	0.000224824	0.00146572	0.0627079	0.00215922	0.000889118	0.000340051	0.000131521	0.000247733	0.00625695	0.0411112	0.00135239	0.00367178	0.00135208	1.91616	0.00381086	0.0123786	0.00969034	0.00360056	0.457116	0.00112278	0.13092	0.000419614	0.00473373	0.00342182	0.00446182	0.337885	0.00921814	0.0125941	0.00133873	0.00165341	0.000650829	0.000225113	0.00213007	0.160635
T10 288T	T10 288T	0.0139475	0.0121609	0.000325938	0.0485615	0.0373384	0.212744	0.474748	0.000705979	0.00842844	0.00971837	0.00202293	0.173178	0.000984331	0.00040535	0.0753033	0.173361	0.171407	0.00539987	0.000201399	0.00443662	0.000176526	0.0965156	0.110368	0.21294	0.00404059	0.113674	0.00691953	0.00208797	0.00195913	0.0408917	0.276978	0.02901	0.0179568	0.00300569	0.000204422	0.00358107	0.00110654	0.0159072	0.0729721	3.58798	0.0510109	0.0714009	0.00828131	0.111894	0.000676298	0.00230884	0.000717792	0.00111582
T10 250N	T10 250N	0.00275013	0.00160605	0.000540245	0.0235093	0.00610722	0.00398309	0.186174	0.00413408	0.00356568	0.0288019	0.000429617	0.112846	0.00336942	0.00146898	0.00331133	0.0185018	0.0341356	0.00221004	0.000188783	0.000204807	6.50976e-05	0.000796239	0.0474855	0.0978711	0.00151004	0.00479454	0.00282708	2.36093	0.00199605	0.0288541	0.064231	0.00178848	0.513971	0.00147318	0.104329	0.000215713	0.000609094	0.000290051	0.0301782	1.43179	0.00586367	0.0132675	0.00142293	0.0282641	0.000328991	0.00129598	0.000206074	0.196788
T10 250T	T10 250T	0.00810493	0.00267145	0.00013277	0.0169137	0.00328509	0.5039	0.166075	0.000452072	0.00447673	0.00928104	0.000449633	0.0801747	0.000570559	0.000147967	0.00331996	0.0694429	0.0831676	0.00353918	0.000150689	0.000641892	7.79352e-05	0.0171045	0.0387801	0.0111764	0.0013991	0.00597563	0.00353022	1.0575	0.000664601	0.0161661	0.116755	0.0102897	0.070513	0.00113856	0.0186195	0.000391986	0.000513121	0.00273091	0.0188651	1.15288	0.00238394	0.048875	0.00207124	0.133838	0.000351318	0.00299366	0.000813181	0.0225502
T10 267N	T10 267N	0.000752033	0.00277135	0.000174475	0.0061239	0.00305889	0.000902557	0.0663097	0.00143062	0.00405364	0.00667669	0.000123279	0.0728377	0.00202036	0.000162964	0.000243566	0.00449388	0.024238	0.00246589	0.000206957	0.000192594	0.000122945	0.000581388	0.0176812	0.0235832	0.000726364	0.00293136	0.00109593	1.66495	0.00280485	0.00982487	0.0247551	0.00155071	0.535881	0.00128326	0.107629	0.00011215	0.000457657	0.000716092	0.00854882	1.48894	0.00383433	0.00420894	0.00260853	0.00650485	0.000135339	0.000132024	0.000386045	0.0559101
T10 267T	T10 267T	0.0119972	0.00618337	0.000869389	0.0290602	0.0149529	0.988058	0.325262	0.000962513	0.00827667	0.00338608	0.00151877	0.329545	0.000694922	0.000342106	0.0275841	0.102538	0.242118	0.00386529	0.000308878	0.00506165	0.000254844	0.0698906	0.0594479	0.170646	0.0030427	0.0320514	0.00624903	0.00480399	0.00111552	0.0385927	0.330894	0.00844347	0.0233815	0.00499038	0.000579032	0.00166409	0.00137281	0.0134762	0.0293571	2.88293	0.04378	0.0876894	0.0067282	0.077547	8.16176e-05	0.00535141	0.000571979	0.00448871
T10 268N	T10 268N	0.00714919	0.00289289	0.000462482	0.0212153	0.00359502	0.0352244	0.480375	0.000820327	0.00470807	0.00424972	0.000432789	0.150499	0.00152765	0.000445325	0.010673	0.0720339	0.0773258	0.00200952	0.000305773	0.0015349	0.000170721	0.0353099	0.0936505	0.229012	0.00472487	0.0223685	0.00246314	1.63826	0.002456	0.0252698	0.125467	0.00113879	0.663525	0.00244066	0.0635836	0.000580633	0.000781085	0.00130036	0.0316395	2.97587	0.0142004	0.0191851	0.00182275	0.0344472	0.00052825	0.000764467	0.000138939	0.077843
T10 268T	T10 268T	0.0286577	0.00336231	0.000739821	0.0194346	0.0074443	0.289863	0.376947	0.000359278	0.00820229	0.00239159	0.000605375	0.148853	0.00102169	0.000299439	0.0117143	0.160702	0.0911012	0.00212525	0.000663939	0.00349731	8.29959e-05	0.0686916	0.0556234	0.107228	0.00319392	0.0518723	0.00305317	0.32797	0.00296877	0.0421749	0.201553	0.00237953	0.0964992	0.00333034	0.0151658	0.00179452	0.00159383	0.00502697	0.0309549	1.74267	0.00731785	0.0403577	0.00222066	0.0331236	0.000388096	0.00146063	0.00031971	0.0158953
T10 272N	T10 272N	0.0031119	0.00580771	0.000137202	0.0131335	0.000721033	0.0238806	0.142462	0.000491181	0.00372425	0.0173693	0.00020962	0.0860773	0.000997209	0.000119158	0.00133921	0.0253286	0.0158113	0.0043388	0.000111097	0.000142489	#DIV/0!	0.006007	0.0436255	0.0526747	0.00235918	0.00770699	0.00149613	1.50675	0.00231683	0.013463	0.0599618	0.0138427	0.642724	0.000743582	0.0662197	0.000119421	0.000489448	0.000514309	0.0137627	1.33592	0.02704	0.00972818	0.000692412	0.0229353	0.000123456	0.000786934	0.000122529	0.0934229
T10 272T	T10 272T	0.0101366	0.00248353	0.00016543	0.0186832	0.00314957	0.359317	0.237198	0.000807188	0.0248107	0.0103872	0.000205907	0.0914741	0.000946247	0.000639564	0.0135949	0.0946389	0.0432453	0.00350649	0.000251799	0.00132294	0.00132954	0.0310352	0.0556637	0.0559692	0.00969356	0.00765872	0.00237821	0.743026	0.00220557	0.0160238	0.126172	0.00969356	0.216425	0.00161113	0.025311	0.000335671	0.000376833	0.00179734	0.012056	1.89033	0.00274625	0.0402837	0.0029417	0.0589039	0.000310964	0.00122466	0.000327243	0.0640226
T10 276N	T10 276N	0.00270639	0.00262498	2.64812e-05	0.00659891	0.000732856	0.00986205	0.0396783	0.000337066	0.00309151	0.00311188	5.61156e-05	0.0420368	0.000581959	0.000132256	0.000253481	0.0101254	0.030806	0.00158508	0.000290046	0.000134993	2.65791e-05	0.00240987	0.00873653	0.0319289	0.00162688	0.0029107	0.000641217	0.961347	0.0007775	0.00612279	0.0387349	0.000171928	0.136114	0.00112117	0.0163827	9.08581e-05	0.0001843	0.00074855	0.00838431	0.475477	0.000860223	0.0105889	0.000795196	0.00968688	0.000546879	0.000216896	5.25759e-05	0.0273434
T10 246T	T10 246T	0.0465791	0.00655714	0.000234125	0.0256665	0.0105313	0.279254	0.469034	0.000206011	0.00982878	0.00478566	0.00193843	0.125815	0.000611805	0.000717758	0.0386683	0.229919	0.103262	0.00170666	0.000351803	0.00321681	0.000124691	0.0819286	0.130282	0.0401402	0.00354427	0.0283054	0.00479377	0.00142266	0.00239619	0.0182381	0.279132	0.0107917	0.00963147	0.0057231	0.000168276	0.00113447	0.00111891	0.00920557	0.0429215	2.25792	0.00856088	0.052762	0.00472605	0.124646	0.000114121	0.00303494	0.000428911	0.00115773
T10 249N	T10 249N	0.0019302	0.00298171	0.000246148	0.00704639	0.0018614	0.00413417	0.0912601	0.0013786	0.0211069	0.00759798	7.08638e-05	0.0434363	0.00154225	0.000354928	0.000559338	0.00619739	0.016083	0.00543307	0.0029063	7.28081e-05	0.00067676	0.00235384	0.0310919	0.0541124	0.00362495	0.0118206	0.0024283	1.27975	0.00116307	0.0216967	0.0254878	0.00178276	0.432776	0.00180173	0.0500581	0.00124013	0.000560043	0.00062734	0.0282334	1.19774	0.00397458	0.00646666	0.000955721	0.00919811	0.000325125	0.000299276	0.00226386	0.0945628
T10 249T	T10 249T	0.0250806	0.0123428	0.000294612	0.0499821	0.0112148	0.222558	0.408668	0.00291921	0.00617116	0.0074531	0.00249135	0.252679	0.00138134	0.000836357	0.0504305	0.102898	0.170481	0.00323643	0.000591511	0.00613658	0.000835963	0.0899429	0.130027	0.191473	0.00393632	0.0659227	0.00347152	0.00097033	0.00922131	0.0317095	0.202279	0.00544705	0.0247285	0.00688995	0.000182879	0.00257229	0.00100338	0.0103203	0.0340466	5.69003	0.0568353	0.0712382	0.00453641	0.10715	0.00170597	0.00151169	0.00147956	0.00163829
T10 186T	T10 186T	0.00963922	0.0074028	0.000634065	0.00661201	0.00640064	0.525561	0.469928	0.00134699	0.00229487	0.00667475	0.000986355	0.147967	0.000102275	0.000562742	0.0619193	0.227902	0.106748	0.00336872	0.000401152	0.00244083	0.00026419	0.0660111	0.114071	0.0461507	0.00171385	0.0255748	0.00401782	0.0609587	0.00224101	0.0282527	0.195899	0.0111059	0.0364452	0.0031276	0.00392312	0.000760428	0.00053223	0.0046051	0.0166705	1.29072	0.0150896	0.0521073	0.00619392	0.127671	0.000228641	0.00167382	0.00112939	0.00627571
T10 191N	T10 191N	0.000928429	0.000841995	5.04399e-05	0.000983986	0.000313017	0.00091914	0.051331	0.000155328	0.00157687	0.00607084	2.13872e-05	0.041664	0.000557282	4.21039e-05	0.000853353	0.00547216	0.00842886	0.00102634	#DIV/0!	6.26169e-05	3.1936e-05	0.000760824	0.00675888	0.0307636	0.000268992	0.00432342	0.000686849	0.818129	0.000519353	0.0103599	0.0302484	0.0011299	0.127937	0.000791393	0.0138393	0.000199258	0.00027367	0.000370886	0.00907983	0.454415	0.00255381	0.00390211	0.000747423	0.00829452	0.000156463	4.67632e-05	0.000322172	0.0377749
T10 191T	T10 191T	0.00929288	0.0072798	0.000330674	0.0227502	0.0131218	0.58114	0.267626	0.000404906	0.0032896	0.0114905	0.000642436	0.145492	0.000245453	0.00035064	0.0411131	0.0868789	0.0719911	0.00381462	0.000185871	0.00160396	0.000225393	0.0200654	0.0635999	0.0520506	0.00258363	0.0459935	0.00238328	0.187253	0.00161363	0.0196147	0.121213	0.00712717	0.0567262	0.00168106	0.00613874	0.00153116	0.00120599	0.00588664	0.0355455	2.31021	0.0376814	0.0345199	0.00504978	0.0536493	0.000394177	0.00147281	0.000839521	0.00979287
T10 192N	T10 192N	0.00175642	0.0395313	0.000871891	0.00505463	0.00577952	0.01919	0.108624	0.00152353	0.01827	0.00547418	0.00193796	0.125955	0.00131609	0.00170667	0.000367065	0.0285878	0.0261442	0.00629772	0.000378057	0.000210622	0.000205821	0.00116009	0.103041	0.0937584	0.000474524	0.00756936	0.00153627	1.4268	0.00414058	0.0214887	0.0235251	0.0139356	0.32856	0.00365451	0.100509	0.000846996	0.000571931	0.000394175	0.0161875	1.58339	0.040627	0.0261535	0.005967	0.00823911	0.00223467	0.000687112	0.00019169	0.0769997
T10 192T	T10 192T	0.000919136	0.0113638	0.000966679	0.0617983	0.0123332	0.0401424	0.319158	0.000964429	0.00225047	0.00949641	0.00161666	0.187782	0.000894857	0.00059912	0.0399945	0.0206532	0.0829625	0.00366922	7.18501e-05	0.00451807	7.02099e-05	0.0301808	0.170234	0.238152	0.00406647	0.103176	0.00609197	0.115701	0.00126494	0.0328792	0.140221	0.035345	0.0235924	0.00348629	0.000932896	0.00175535	0.001037	0.00453834	0.0797346	5.42667	0.113358	0.0360848	0.00838452	0.146838	0.00203299	0.00132693	0.00135094	0.00287588
T10 193N	T10 193N	0.000729268	0.00739537	0.000321006	0.00414016	0.000789999	0.00572844	0.0536247	0.000539301	0.00472336	0.00176839	#DIV/0!	0.0489175	0.000887828	0.000727879	0.000300194	0.00960855	0.0168921	0.00298516	6.984e-05	0.000156944	6.79469e-05	0.000878126	0.0199019	0.0451979	0.000416373	0.00568398	0.00108588	0.496562	0.000688508	0.00659761	0.0174778	0.00138748	0.175966	0.0011004	0.0318245	0.000110712	0.00037689	0.000661443	0.00907652	1.00932	0.000797377	0.0089063	0.00144587	0.00727674	0.0010351	8.37345e-05	0.000176766	0.0357195
T10 193T	T10 193T	0.00627262	0.00546628	0.000352077	0.0241221	0.00677397	0.21594	0.211911	0.00105995	0.00237264	0.00444039	0.000367075	0.0686168	0.000255029	0.000287641	0.00854354	0.0658028	0.0979284	0.00309586	0.00011243	0.00147292	0.000170156	0.0425876	0.0335369	0.0666446	0.00153537	0.0306349	0.00476372	0.0686959	0.00114179	0.017688	0.200299	0.00362497	0.00957313	0.00101893	0.000853448	0.000440722	0.00103079	0.0047421	0.02434	1.65973	0.0317652	0.0580715	0.00478189	0.043083	0.000489933	0.00457791	0.00170512	0.00334585
T10 194N	T10 194N	0.00190885	0.00199457	0.000349397	0.00537201	0.00309899	0.0096586	0.0466913	0.000523581	0.00476282	0.00727704	#DIV/0!	0.05776	0.000799477	0.000670617	0.00029638	0.00938616	0.0178227	0.00246769	0.000125296	0.000117821	#DIV/0!	0.000138064	0.00999929	0.0380596	0.000749855	0.000904898	0.0014495	0.541689	0.000938717	0.012449	0.0152341	0.000734888	0.190374	0.00155717	0.0486859	3.5391e-05	0.000352147	0.000389507	0.00677835	0.709126	0.0126227	0.0122008	0.00354225	0.0105454	6.82859e-05	0.000112572	0.000409558	0.0626724
T10 194T	T10 194T	0.00544761	0.0214695	0.000753986	0.0655188	0.0287781	0.301785	0.353677	0.00197872	0.00931761	0.022859	0.00175534	0.345989	0.000803556	0.000191357	0.0585439	0.101504	0.297401	0.00605304	0.000699176	0.0199993	0.000223059	0.0480007	0.101635	0.585434	0.00528424	0.218916	0.00749989	0.0630635	0.0224252	0.0867189	0.154237	0.0358937	0.0823474	0.00292387	0.00264025	0.00721411	0.00428745	0.0197877	0.0292177	4.39951	0.240615	0.0353388	0.0062947	0.0325251	0.000661948	0.00202059	0.00272043	0.0140481
T10 195N	T10 195N	0.000921971	0.00342581	0.000916537	0.00246827	0.00368604	0.0430993	0.0283997	0.000347818	0.0011832	0.000560253	5.81398e-05	0.0569333	0.000720264	0.000515183	0.000157565	0.0111871	0.0187356	0.000905986	0.000526472	0.000107173	6.58311e-05	0.000706031	0.00652663	0.0211978	0.000272389	0.000968161	0.00123771	0.39242	0.00136431	0.0124345	0.00969831	0.00271223	0.0650271	0.00247039	0.0113444	0.000195215	0.000167148	0.000693442	0.00945908	0.522247	0.00681764	0.0188979	0.00314672	0.00617243	0.00157739	0.000129623	0.000127028	0.0254268
T10 195T	T10 195T	0.0113869	0.00624487	0.000462221	0.0206914	0.0135144	2.01037	0.486874	0.000596681	0.0182274	0.0045121	0.00102546	0.131758	0.000983289	0.0001498	0.0429902	0.242327	0.0970125	0.00325778	0.000327598	0.00272574	8.99297e-05	0.0731459	0.0766099	0.0944607	0.00549461	0.063033	0.00432514	0.124608	0.0091503	0.0188887	0.230692	0.00997901	0.0282924	0.00341674	0.00459424	0.000741987	0.000704267	0.00704552	0.0496489	4.18631	0.023208	0.0543553	0.00788947	0.176271	0.0014926	0.00296149	0.00227312	0.00602419
T10 213N	T10 213N	0.000280361	0.007071	0.000320954	0.00186085	0.00097129	0.00447703	0.0553574	0.000294013	0.00364771	0.00208671	#DIV/0!	0.0330835	0.000507233	0.00014802	3.4548e-05	0.00327738	0.0140839	0.00360583	6.26325e-05	5.83348e-05	6.56976e-05	0.000302421	0.0175123	0.0507493	0.00235948	0.00374595	0.000579735	0.398739	0.00033969	0.00274445	0.0212415	0.00415283	0.384808	0.000314667	0.0263312	0.000132287	0.000313356	0.000308079	0.00913496	0.529687	0.0297508	0.00259187	0.000318527	0.00383304	0.000474544	0.000165646	0.00449534	0.0346271
T10 213T	T10 213T	0.00183568	0.00946062	0.000514253	0.0746068	0.0167645	0.0772128	0.562741	0.000920905	0.000993879	0.0106959	0.000500058	0.170461	0.000644097	0.000309236	0.0555672	0.358789	0.0656635	0.0141362	2.05611e-05	0.00147812	2.59436e-05	0.136797	0.114761	0.850474	0.00281669	0.139675	0.00145276	0.0619614	0.0221753	0.0386404	0.132913	0.000705239	0.0591813	0.000975361	0.00721009	0.000637488	0.00420138	0.00311672	0.0742055	5.04858	0.0862603	0.0292021	0.00549852	0.0313056	0.000368646	0.000566437	0.000157343	0.00700218
T10 219N	T10 219N	0.00158102	0.00390354	0.000390706	0.00938881	0.000724414	0.00158364	0.0957241	0.00144175	0.00240766	0.0143213	9.82038e-05	0.0601384	0.00250768	0.000387441	0.00164113	0.0190601	0.0104062	0.00267749	0.000130104	0.000126332	0.000733574	0.00162586	0.0140158	0.048443	0.000952785	0.00270778	0.0014084	0.472153	0.00301973	0.0146098	0.0257828	0.000434586	0.256953	0.00104466	0.0527301	0.000123603	0.0115933	0.00143343	0.00758759	0.578349	0.0222894	0.0126286	0.0036514	0.00980422	0.000125686	0.000494129	0.000577228	0.170411
T10 219T	T10 219T	0.0208989	0.00344942	0.000215764	0.00673523	0.00203965	0.517829	0.276715	0.000441989	0.00721592	0.00363004	0.000153271	0.0785408	0.000420017	3.23877e-05	0.016379	0.144203	0.0609589	0.00261372	0.000405879	0.00345345	9.40534e-05	0.0271061	0.020992	0.0346356	0.00188143	0.0209336	0.00321284	0.218248	0.0071335	0.0174949	0.193619	0.000430072	0.0663983	0.00354238	0.018112	0.000302685	0.00152049	0.0104936	0.0152081	1.41105	0.00595418	0.0425843	0.00328074	0.0367315	0.000145663	0.00295973	0.000426331	0.0472019
T10 236N	T10 236N	0.00237088	0.00311616	0.000225521	0.00753295	0.000923675	0.0102763	0.0161564	0.000217864	0.000328062	0.000984767	3.94443e-05	0.0395839	0.00053345	0.000986718	0.000108155	0.00698475	0.0169614	0.00254558	7.97763e-05	4.68824e-05	0.000205021	0.000142192	0.0196138	0.0157578	0.000341654	0.000596427	0.00154617	0.429592	0.00224226	0.0134402	0.00774914	0.000218721	0.0716996	0.00240179	0.0127486	8.08827e-05	8.04632e-05	0.000754917	0.00949717	0.400964	0.000774438	0.0188949	0.00722714	0.00406321	0.000284119	0.000139248	5.37752e-05	0.0115408
T10 236T	T10 236T	0.0324543	0.0156151	0.000974937	0.0810391	0.0108772	0.344073	0.218938	0.000716715	0.0191605	0.00685256	0.000924987	0.240398	0.000147271	0.00101562	0.031445	0.196785	0.201631	0.00610972	0.000328892	0.00284705	0.000475224	0.0346146	0.147961	0.390411	0.00184092	0.140467	0.0046871	0.149321	0.00495117	0.00325587	0.145778	0.0405392	0.0214245	0.00279491	0.0574474	0.00180833	0.0012865	0.00401969	0.0213791	3.59094	0.0557705	0.0516182	0.0235424	0.0210941	0.00349508	0.00178504	0.000218682	0.0039144
T10 246N	T10 246N	0.0180902	0.00537051	0.000646019	0.00312699	0.000455515	0.00381009	0.0129129	0.000204994	0.000837558	0.0010447	6.09716e-05	0.0559226	0.000780402	0.00162232	0.000199327	0.00612304	0.0182983	0.00103791	7.73584e-05	#DIV/0!	#DIV/0!	#DIV/0!	0.00830804	0.0161571	0.00144825	0.00321785	0.000798699	0.791939	0.00284374	0.0266513	0.00814312	0.00011692	0.077466	0.00255149	0.00965742	0.000952783	0.000482986	0.00116409	0.00801555	0.46599	0.0123529	0.022	0.00630779	0.00275205	0.000103996	0.000142518	3.10247e-05	0.0207341
T10 186N	T10 186N	0.00117576	0.00115219	2.63136e-05	0.0105795	0.000534765	0.00187128	0.133354	0.000215682	0.00223938	0.00342027	8.29949e-05	0.0711107	0.0017462	0.000237735	0.000721581	0.00517266	0.0256374	0.00423789	4.99381e-05	0.000243511	#DIV/0!	0.000921921	0.0289775	0.0731651	0.000329986	0.00136129	0.00132995	2.70033	0.00141923	0.0114775	0.0505842	0.000331194	0.555402	0.000700519	0.158062	0.000380674	0.0101523	0.000236025	0.0156307	1.10904	0.00225322	0.00634516	0.00229254	0.00945688	0.000220844	0.000100838	0.0001481	0.0946958
[truncated: 7 more columns]

## Sheet: P1
Raw data (P1)						Data processing (P1)
Sample	Target	Task	CT			Sample	Target	CT1	CT2	Mean CT	△Ct	Relative expression (relative to GAPDH)	△Ct	Relative expression (relative to OAZ1)	△Ct	Relative expression (relative to β-actin)
10T	RUNX2	1	26.8644			4N	RUNX2	29.8168	29.7159	29.7664	8.70043	0.00240386	9.1886	0.00171378	11.6554	0.000310005
10T	RUNX2	2	27.2023			4N	MCF2L2-2	33.1	32.6566	32.8783	11.8123	0.000278057	12.3005	0.000198234	14.7673	3.58585e-05
10T	MCF2L2-2	1	31.0575			4N	NRP2	26.7139	26.7691	26.7415	5.67554	0.0195656	6.16371	0.0139488	8.63053	0.0025232
10T	MCF2L2-2	2	31.3098			4N	RASD2-2	28.4375	29.6178	29.0276	7.96169	0.00401136	8.44986	0.00285981	10.9167	0.000517309
10T	NRP2	1	24.6409			4N	SFTPB	32.1227	31.6943	31.9085	10.8426	0.000544584	11.3307	0.000388249	13.7976	7.023e-05
10T	NRP2	2	24.8632			4N	MET	23.664	23.7808	23.7224	2.65646	0.158609	3.14463	0.113076	5.61145	0.0204543
10T	RASD2-2	1	27.9788			4N	RFX8	31.1435	31.2021	31.1728	10.1069	0.000906826	10.5951	0.000646501	13.0619	0.000116945
10T	RASD2-2	2	27.9792			4N	SHC3	29.5625	29.3059	29.4342	8.3683	0.00302616	8.85647	0.00215743	11.3233	0.000390257
10T	SFTPB	1	23.649			4N	CDH13	26.294	26.4004	26.3472	5.2813	0.025714	5.76947	0.0183322	8.23629	0.00331611
10T	SFTPB	2	23.5411			4N	DRAXIN	35.8319	34.2604	35.0461	13.9802	6.18789e-05	14.4684	4.41152e-05	16.9352	7.97997e-06
10T	MET	1	25.4098			4N	RAB27A	24.7002	24.7462	24.7232	3.65723	0.079262	4.1454	0.0565081	6.61222	0.0102217
10T	MET	2	24.9781			4N	C8orf44 SGK3	29.8433	29.7599	29.8016	8.73568	0.00234584	9.22385	0.00167241	11.6907	0.000302522
10T	GAPDH	1	22.8573			4N	HTR7-2	31.8392	32.2784	32.0588	10.9929	0.000490706	11.481	0.000349838	13.9478	6.3282e-05
10T	GAPDH	2	22.7602			4N	GABBR2	29.9899	29.5755	29.7827	8.71678	0.00237677	9.20495	0.00169447	11.6718	0.000306511
10T	RFX8	1	30.1456			4N	DPP4-2	27.983	28.1145	28.0488	6.98281	0.00790612	7.47099	0.00563649	9.93781	0.00101958
10T	RFX8	2	31.1553			4N	BHLHE40	24.343	24.46	24.4015	3.33556	0.0990596	3.82373	0.0706223	6.29055	0.0127748
10T	SHC3	1	28.1971			4N	ATP10A	28.4845	28.8791	28.6818	7.61585	0.00509801	8.10402	0.00363451	10.5708	0.000657444
10T	SHC3	2	28.135			4N	COL26A1-2	33.9325	34.5513	34.2419	13.1759	0.000108055	13.6641	7.70354e-05	16.1309	1.39349e-05
10T	CDH13	1	27.5349			4N	FAM178B	31.9298	32.208	32.0689	11.003	0.000487281	11.4911	0.000347396	13.958	6.28403e-05
10T	CDH13	2	27.3535			4N	GRM5-2	34.7797	35.307	35.0434	13.9774	6.19975e-05	14.4656	4.41997e-05	16.9324	7.99526e-06
10T	DRAXIN	1	31.0821			4N	LIPH	31.9223	32.9406	32.4315	11.3655	0.000378997	11.8537	0.000270197	14.3205	4.88758e-05
10T	DRAXIN	2	32.0933			4N	NRCAM	25.4897	25.7719	25.6308	4.56484	0.0422519	5.05301	0.0301225	7.51983	0.00544884
10T	RAB27A	1	24.725			4N	NELL2	23.3768	23.4176	23.3972	2.33123	0.198715	2.8194	0.141669	5.28622	0.0256265
10T	RAB27A	2	24.7894			4N	RIN1	30.4225	30.3822	30.4023	9.33638	0.00154693	9.82455	0.00110285	12.2914	0.000199493
10T	C8orf44 SGK3	1	31.4449			4N	LRP4	27.0502	27.2348	27.1425	6.07652	0.0148178	6.5647	0.010564	9.03152	0.00191092
10T	C8orf44 SGK3	2	30.814			4N	VDR	29.3531	29.7754	29.5642	8.49831	0.00276538	8.98648	0.00197151	11.4533	0.000356626
10T	HTR7-2	1	30.2066			4N	TPO	20.2754	20.5305	20.4029	-0.662989	1.58336	-0.174816	1.12882	2.292	0.204192
10T	HTR7-2	2	30.5775			4N	TP63	30.2448	30.2841	30.2644	9.19851	0.00170205	9.68668	0.00121344	12.1535	0.000219499
10T	GABBR2	1	26.6105			4N	TNIK	26.0923	26.203	26.1477	5.08173	0.0295289	5.5699	0.021052	8.03672	0.00380808
10T	GABBR2	2	26.4489			4N	KRT19	25.4536	25.5448	25.4992	4.43325	0.0462871	4.92142	0.0329994	7.38824	0.00596923
10T	DPP4-2	1	25.9878			4N	GAP43	33.3607	34.3828	33.8717	12.8058	0.00013966	13.294	9.95677e-05	15.7608	1.80107e-05
10T	DPP4-2	2	26.103			4N	MATN2	21.5856	21.6245	21.605	0.539084	0.688208	1.02726	0.490642	3.49408	0.0887519
10T	BHLHE40	1	23.3383			4N	E2F1	30.522	30.4236	30.4728	9.40685	0.00147318	9.89502	0.00105027	12.3618	0.000189983
10T	BHLHE40	2	23.4732			4N	CDH16	25.313	25.4764	25.3947	4.32872	0.049765	4.8169	0.0354789	7.28372	0.00641775
10T	ATP10A	1	28.4199			4N	ALK	34.2082	32.8834	33.5458	12.4799	0.000175061	12.968	0.000124805	15.4349	2.2576e-05
10T	ATP10A	2	28.2871			4N	ADRA1B-2	30.9665	31.2658	31.1161	10.0502	0.000943169	10.5384	0.000672411	13.0052	0.000121632
10T	COL26A1-2	1	32.5346			4N	ABTB2-2	31.0094	30.4815	30.7455	9.67951	0.00121948	10.1677	0.000869403	12.6345	0.000157266
10T	COL26A1-2	2	31.154			4N	CHST2-2	26.1366	26.0315	26.084	5.01808	0.0308607	5.50626	0.0220015	7.97308	0.00397983
10T	FAM178B	1	29.6863			4N	NPC2	20.8948	20.5482	20.7215	-0.34443	1.26965	0.143743	0.905168	2.61056	0.163735
10T	FAM178B	2	29.6018			4N	RPP15-3	30.0417	27.937	28.9894	7.92343	0.00411917	8.4116	0.00293667	10.8784	0.000531213
10T	GRM5-2	1	33.839			4N	RUNX1	27.2742	27.4389	27.3566	6.29064	0.0127741	6.77881	0.00910697	9.24563	0.00164735
10T	GRM5-2	2	34.7811			4N	SLC1A5	28.7005	29.4035	29.052	7.98602	0.00394428	8.4742	0.00281198	10.941	0.000508658
10T	LIPH	1	26.0729			4N	ITGA2	27.046	27.2862	27.1661	6.10015	0.0145771	6.58832	0.0103924	9.05514	0.00187988
10T	LIPH	2	26.1024			4N	SHC4	31.0038	32.7913	31.8975	10.8316	0.000548738	11.3198	0.00039121	13.7866	7.07658e-05
10T	NRCAM	1	25.0888			4N	STAC	31.9682	31.4431	31.7057	10.6397	0.000626791	11.1279	0.000446856	13.5947	8.08316e-05
10T	NRCAM	2	25.1923			4N	SPOCD1-2	33.0574	32.5268	32.7921	11.7261	0.000295178	12.2143	0.000210441	14.6811	3.80665e-05
10T	NELL2	1	25.7044			4N	TFCP2L1	23.4554	23.6911	23.5733	2.50733	0.175881	2.9955	0.125391	5.46232	0.0226818
10T	NELL2	2	25.8131			4N	SLC25A21	28.9499	28.6535	28.8017	7.73576	0.0046914	8.22394	0.00334463	10.6908	0.000605008
10T	RIN1	1	29.0867			4N	TNC	32.38	33.1903	32.7851	11.7192	0.000296601	12.2074	0.000211455	14.6742	3.825e-05
10T	RIN1	2	28.9839			4N	TIAM1-2	28.8575	29.4604	29.1589	8.09301	0.00366236	8.58118	0.002611	11.048	0.000472301
10T	LRP4	1	25.116			4N	GALNT7	24.2969	24.4728	24.3849	3.31892	0.100209	3.8071	0.0714414	6.27392	0.012923
10T	LRP4	2	25.2173			4N	DUSP6	28.2373	28.4965	28.3669	7.30098	0.00634141	7.78915	0.00452097	10.256	0.000817795
10T	VDR	1	28.2699			4N	GALNTL6-2	34.1946	33.5433	33.869	12.803	0.000139929	13.2912	9.97593e-05	15.758	1.80454e-05
10T	VDR	2	28.0597			4N	KIAA1549L-2	36.0356	35.4137	35.7246	14.6587	3.86629e-05	15.1469	2.75638e-05	17.6137	4.986e-06
10T	TPO	1	23.1064			4N	GAPDH	21.0725	21.0594	21.0659
10T	TPO	2	23.1992			4N	OAZ1	20.5125	20.6431	20.5778
10T	TP63	1	27.3504			4N	β-actin	18.1607	18.0611	18.1109
10T	TP63	2	27.2929			10T	RUNX2	26.8644	27.2023	27.0333	4.22457	0.0534908	4.47198	0.0450609	7.56706	0.00527337
10T	TNIK	1	25.9671			10T	MCF2L2-2	31.0575	31.3098	31.1837	8.37488	0.00301239	8.62229	0.00253765	11.7174	0.000296975
10T	TNIK	2	26.0233			10T	NRP2	24.6409	24.8632	24.7521	1.9433	0.260022	2.19071	0.219044	5.28579	0.0256342
10T	KRT19	1	24.2123			10T	RASD2-2	27.9788	27.9792	27.979	5.17019	0.0277727	5.4176	0.0233958	8.51268	0.00273796
10T	KRT19	2	24.1033			10T	SFTPB	23.649	23.5411	23.5951	0.786279	0.579838	1.03369	0.488458	4.12877	0.0571631
10T	GAP43	1	28.2242			10T	MET	25.4098	24.9781	25.194	2.38519	0.19142	2.6326	0.161253	5.72768	0.018871
10T	GAP43	2	28.2245			10T	RFX8	30.1456	31.1553	30.6504	7.84165	0.00435941	8.08906	0.00367239	11.1841	0.000429771
10T	MATN2	1	25.9637			10T	SHC3	28.1971	28.135	28.166	5.35727	0.0243949	5.60469	0.0205504	8.69977	0.00240497
10T	MATN2	2	25.9264			10T	CDH13	27.5349	27.3535	27.4442	4.63543	0.0402344	4.88284	0.0338937	7.97792	0.00396649
10T	E2F1	1	28.3839			10T	DRAXIN	31.0821	32.0933	31.5877	8.77896	0.00227651	9.02637	0.00191775	12.1215	0.000224429
10T	E2F1	2	28.5412			10T	RAB27A	24.725	24.7894	24.7572	1.94843	0.259098	2.19584	0.218266	5.29092	0.0255431
10T	CDH16	1	28.102			10T	C8orf44 SGK3	31.4449	30.814	31.1295	8.32069	0.00312769	8.5681	0.00263478	11.6632	0.000308342
10T	CDH16	2	27.9046			10T	HTR7-2	30.2066	30.5775	30.3921	7.58328	0.0052144	7.8307	0.00439264	10.9258	0.00051406
10T	ALK	1	30.6908			10T	GABBR2	26.6105	26.4489	26.5297	3.7209	0.0758397	3.96832	0.0638877	7.0634	0.00747663
10T	ALK	2	31.3874			10T	DPP4-2	25.9878	26.103	26.0454	3.23662	0.106092	3.48403	0.0893721	6.57911	0.010459
10T	ADRA1B-2	1	31.7851			10T	BHLHE40	23.3383	23.4732	23.4057	0.596956	0.661147	0.84437	0.556954	3.93945	0.065179
10T	ADRA1B-2	2	32.1785			10T	ATP10A	28.4199	28.2871	28.3535	5.5447	0.0214229	5.79212	0.0180467	8.8872	0.00211197
10T	ABTB2-2	1	27.8757			10T	COL26A1-2	32.5346	31.154	31.8443	9.03555	0.00190559	9.28296	0.00160528	12.378	0.000187862
10T	ABTB2-2	2	27.9834			10T	FAM178B	29.6863	29.6018	29.6441	6.83531	0.00875723	7.08272	0.00737714	10.1778	0.000863328
10T	CHST2-2	1	26.1505			10T	GRM5-2	33.839	34.7811	34.31	11.5013	0.000344966	11.7487	0.000290601	14.8438	3.40083e-05
10T	CHST2-2	2	25.9655			10T	LIPH	26.0729	26.1024	26.0876	3.27887	0.103029	3.52629	0.0867925	6.62137	0.0101571
10T	NPC2	1	20.9969			10T	NRCAM	25.0888	25.1923	25.1405	2.33176	0.198641	2.57918	0.167336	5.67426	0.019583
10T	NPC2	2	21.0005			10T	NELL2	25.7044	25.8131	25.7588	2.95002	0.129407	3.19743	0.109013	6.29251	0.0127575
10T	RPP15-3	1	27.0087			10T	RIN1	29.0867	28.9839	29.0353	6.22655	0.0133543	6.47396	0.0112497	9.56904	0.00131653
10T	RPP15-3	2	26.986			10T	LRP4	25.116	25.2173	25.1666	2.35786	0.195081	2.60527	0.164337	5.70035	0.019232
10T	RUNX1	1	23.4065			10T	VDR	28.2699	28.0597	28.1648	5.35602	0.0244162	5.60343	0.0205683	8.69851	0.00240706
10T	RUNX1	2	23.35			10T	TPO	23.1064	23.1992	23.1528	0.344012	0.787847	0.591426	0.663687	3.68651	0.0776696
10T	SLC1A5	1	28.0748			10T	TP63	27.3504	27.2929	27.3216	4.51287	0.0438017	4.76028	0.0368988	7.85536	0.00431818
10T	SLC1A5	2	28.4771			10T	TNIK	25.9671	26.0233	25.9952	3.1864	0.10985	3.43381	0.0925378	6.52889	0.0108295
10T	ITGA2	1	25.0313			10T	KRT19	24.2123	24.1033	24.1578	1.34904	0.392553	1.59645	0.330689	4.69153	0.0386997
10T	ITGA2	2	25.1743			10T	GAP43	28.2242	28.2245	28.2243	5.41556	0.023429	5.66297	0.0197367	8.75805	0.00230974
10T	SHC4	1	32.3678			10T	MATN2	25.9637	25.9264	25.9451	3.1363	0.113731	3.38372	0.0958074	6.4788	0.0112121
10T	SHC4	2	32.8058			10T	E2F1	28.3839	28.5412	28.4625	5.65377	0.0198631	5.90118	0.0167328	8.99626	0.0019582
10T	STAC	1	29.9938			10T	CDH16	28.102	27.9046	28.0033	5.19456	0.0273075	5.44197	0.023004	8.53705	0.0026921
10T	STAC	2	30.559			10T	ALK	30.6908	31.3874	31.0391	8.2303	0.00332992	8.47771	0.00280514	11.5728	0.000328279
10T	SPOCD1-2	1	31.9175			10T	ADRA1B-2	31.7851	32.1785	31.9818	9.17302	0.00173239	9.42044	0.00145937	12.5155	0.000170787
10T	SPOCD1-2	2	31.5023			10T	ABTB2-2	27.8757	27.9834	27.9295	5.12075	0.0287409	5.36816	0.0242115	8.46324	0.00283341
10T	TFCP2L1	1	26.3147			10T	CHST2-2	26.1505	25.9655	26.058	3.2492	0.10517	3.49662	0.088596	6.59169	0.0103682
10T	TFCP2L1	2	27.1718			10T	NPC2	20.9969	21.0005	20.9987	-1.81011	3.50668	-1.56269	2.95404	1.53239	0.345705
10T	SLC25A21	1	32.4484			10T	RPP15-3	27.0087	26.986	26.9973	4.18856	0.0548426	4.43597	0.0461997	7.53105	0.00540664
10T	SLC25A21	2	33.0011			10T	RUNX1	23.4065	23.35	23.3783	0.569479	0.67386	0.816893	0.567663	3.91197	0.0664323
10T	TNC	1	28.3544			10T	SLC1A5	28.0748	28.4771	28.276	5.46719	0.0226054	5.7146	0.0190429	8.80968	0.00222855
10T	TNC	2	29.3776			10T	ITGA2	25.0313	25.1743	25.1028	2.29402	0.203906	2.54143	0.171772	5.63651	0.020102
10T	TIAM1-2	1	26.8656			10T	SHC4	32.3678	32.8058	32.5868	9.77806	0.00113896	10.0255	0.00095947	13.1206	0.000112284
10T	TIAM1-2	2	27.5592			10T	STAC	29.9938	30.559	30.2764	7.46766	0.00564952	7.71507	0.00475918	10.8102	0.000556956
10T	GALNT7	1	24.537			10T	SPOCD1-2	31.9175	31.5023	31.7099	8.90116	0.00209162	9.14857	0.00176199	12.2437	0.000206202
10T	GALNT7	2	24.3729			10T	TFCP2L1	26.3147	27.1718	26.7433	3.93449	0.0654032	4.18191	0.055096	7.27699	0.00644775
10T	DUSP6	1	29.4799			10T	SLC25A21	32.4484	33.0011	32.7248	9.91599	0.00103512	10.1634	0.000871989	13.2585	0.000102047
10T	DUSP6	2	29.1674			10T	TNC	28.3544	29.3776	28.866	6.05722	0.0150174	6.30463	0.0126507	9.39971	0.00148049
10T	GALNTL6-2	1	33.0176			10T	TIAM1-2	26.8656	27.5592	27.2124	4.40364	0.0472468	4.65105	0.0398009	7.74613	0.00465781
10T	GALNTL6-2	2	34.0945			10T	GALNT7	24.537	24.3729	24.455	1.6462	0.31948	1.89362	0.269132	4.9887	0.0314958
10T	KIAA1549L-2	1	34.7196			10T	DUSP6	29.4799	29.1674	29.3236	6.51487	0.0109352	6.76229	0.00921189	9.85737	0.00107805
10T	KIAA1549L-2	2	36.4807			10T	GALNTL6-2	33.0176	34.0945	33.5561	10.7473	0.000581756	10.9947	0.000490074	14.0898	5.73522e-05
10T	OAZ1	1	22.4945			10T	KIAA1549L-2	34.7196	36.4807	35.6002	12.7914	0.000141062	13.0388	0.000118832	16.1339	1.39066e-05
10T	OAZ1	2	22.6282			10T	GAPDH	22.8573	22.7602	22.8088
10T	β-actin	1	19.4655			10T	OAZ1	22.4945	22.6282	22.5614
10T	β-actin	2	19.4671			10T	β-actin	19.4655	19.4671	19.4663
4N	RUNX2	1	29.8168
4N	RUNX2	2	29.7159
4N	MCF2L2-2	1	33.1
4N	MCF2L2-2	2	32.6566
4N	NRP2	1	26.7139
4N	NRP2	2	26.7691
4N	RASD2-2	1	28.4375
4N	RASD2-2	2	29.6178
4N	SFTPB	1	32.1227
4N	SFTPB	2	31.6943
4N	MET	1	23.664
4N	MET	2	23.7808
4N	GAPDH	1	21.0725
4N	GAPDH	2	21.0594
4N	RFX8	1	31.1435
4N	RFX8	2	31.2021
4N	SHC3	1	29.5625
4N	SHC3	2	29.3059
4N	CDH13	1	26.294
4N	CDH13	2	26.4004
4N	DRAXIN	1	35.8319
4N	DRAXIN	2	34.2604
4N	RAB27A	1	24.7002
4N	RAB27A	2	24.7462
4N	C8orf44 SGK3	1	29.8433
4N	C8orf44 SGK3	2	29.7599
4N	HTR7-2	1	31.8392
4N	HTR7-2	2	32.2784
4N	GABBR2	1	29.9899
4N	GABBR2	2	29.5755
4N	DPP4-2	1	27.983
4N	DPP4-2	2	28.1145
4N	BHLHE40	1	24.343
4N	BHLHE40	2	24.46
4N	ATP10A	1	28.4845
4N	ATP10A	2	28.8791
4N	COL26A1-2	1	33.9325
4N	COL26A1-2	2	34.5513
4N	FAM178B	1	31.9298
4N	FAM178B	2	32.208
4N	GRM5-2	1	34.7797
4N	GRM5-2	2	35.307
4N	LIPH	1	31.9223
4N	LIPH	2	32.9406
4N	NRCAM	1	25.4897
4N	NRCAM	2	25.7719
4N	NELL2	1	23.3768
4N	NELL2	2	23.4176
4N	RIN1	1	30.4225
4N	RIN1	2	30.3822
4N	LRP4	1	27.0502
4N	LRP4	2	27.2348
4N	VDR	1	29.3531
4N	VDR	2	29.7754
4N	TPO	1	20.2754
4N	TPO	2	20.5305
4N	TP63	1	30.2448
4N	TP63	2	30.2841
4N	TNIK	1	26.0923
4N	TNIK	2	26.203
4N	KRT19	1	25.4536
4N	KRT19	2	25.5448
4N	GAP43	1	33.3607
4N	GAP43	2	34.3828
4N	MATN2	1	21.5856
4N	MATN2	2	21.6245
4N	E2F1	1	30.522
4N	E2F1	2	30.4236
4N	CDH16	1	25.313
4N	CDH16	2	25.4764
4N	ALK	1	34.2082
4N	ALK	2	32.8834
4N	ADRA1B-2	1	30.9665
4N	ADRA1B-2	2	31.2658
4N	ABTB2-2	1	31.0094
4N	ABTB2-2	2	30.4815
4N	CHST2-2	1	26.1366
4N	CHST2-2	2	26.0315
4N	NPC2	1	20.8948
4N	NPC2	2	20.5482
4N	RPP15-3	1	30.0417
4N	RPP15-3	2	27.937
4N	RUNX1	1	27.2742
4N	RUNX1	2	27.4389
4N	SLC1A5	1	28.7005
4N	SLC1A5	2	29.4035
4N	ITGA2	1	27.046
4N	ITGA2	2	27.2862
4N	SHC4	1	31.0038
4N	SHC4	2	32.7913
4N	STAC	1	31.9682
4N	STAC	2	31.4431
4N	SPOCD1-2	1	33.0574
4N	SPOCD1-2	2	32.5268
4N	TFCP2L1	1	23.4554
4N	TFCP2L1	2	23.6911
4N	SLC25A21	1	28.9499
4N	SLC25A21	2	28.6535
4N	TNC	1	32.38
4N	TNC	2	33.1903
4N	TIAM1-2	1	28.8575
4N	TIAM1-2	2	29.4604
4N	GALNT7	1	24.2969
4N	GALNT7	2	24.4728
4N	DUSP6	1	28.2373
4N	DUSP6	2	28.4965
4N	GALNTL6-2	1	34.1946
4N	GALNTL6-2	2	33.5433
4N	KIAA1549L-2	1	36.0356
4N	KIAA1549L-2	2	35.4137
4N	OAZ1	1	20.5125
4N	OAZ1	2	20.6431
4N	β-actin	1	18.1607
4N	β-actin	2	18.0611

## Sheet: P2
Raw data (P2)						Data processing (P2)
Sample	Target	Task	CT			Sample	Target	CT1	CT2	Mean CT	△Ct	Relative expression (relative to GAPDH)	△Ct	Relative expression (relative to OAZ1)	△Ct	Relative expression (relative to β-actin)
10N	RUNX2	1	27.966			10N	RUNX2	27.966	27.3119	27.6389	5.82484	0.017642	6.17098	0.0138787	9.1	0.00182233
10N	RUNX2	2	27.3119			10N	MCF2L2-2	30.488	31.3415	30.9147	9.10064	0.00182153	9.44678	0.00143297	12.3758	0.000188154
10N	MCF2L2-2	1	30.488			10N	NRP2	26.0091	25.8642	25.9367	4.12255	0.0574101	4.4687	0.0451636	7.39771	0.00593016
10N	MCF2L2-2	2	31.3415			10N	RASD2-2	29.0811	26.3449	27.713	5.89892	0.016759	6.24507	0.013184	9.17408	0.00173111
10N	NRP2	1	26.0091			10N	SFTPB	27.8463	27.6248	27.7356	5.92148	0.016499	6.26762	0.0129795	9.19664	0.00170426
10N	NRP2	2	25.8642			10N	MET	27.1583	27.0311	27.0947	5.28057	0.025727	5.62672	0.020239	8.55573	0.00265747
10N	RASD2-2	1	29.0811			10N	RFX8	30.5328	30.7917	30.6623	8.84816	0.00216989	9.19431	0.00170702	12.1233	0.000224138
10N	RASD2-2	2	26.3449			10N	SHC3	30.5258	30.0008	30.2633	8.44917	0.00286118	8.79532	0.00225084	11.7243	0.000295545
10N	SFTPB	1	27.8463			10N	CDH13	28.5716	27.9843	28.2779	6.46382	0.0113291	6.80997	0.00891241	9.73899	0.00117023
10N	SFTPB	2	27.6248			10N	DRAXIN	34.616	36.0248	35.3204	13.5063	8.59424e-05	13.8524	6.76095e-05	16.7814	8.8774e-06
10N	MET	1	27.1583			10N	RAB27A	24.8877	24.8956	24.8916	3.07754	0.118459	3.42369	0.0931897	6.3527	0.0122362
10N	MET	2	27.0311			10N	C8orf44 SGK3	30.2296	30.1372	30.1834	8.36931	0.00302404	8.71545	0.00237896	11.6445	0.000312367
10N	GAPDH	1	21.8881			10N	HTR7-2	29.2705	29.3054	29.288	7.47386	0.00562528	7.82	0.00442532	10.749	0.000581062
10N	GAPDH	2	21.7401			10N	GABBR2	33.3611	33.1015	33.2313	11.4172	0.000365661	11.7633	0.00028766	14.6924	3.77709e-05
10N	RFX8	1	30.5328			10N	DPP4-2	28.2759	28.4798	28.3779	6.56375	0.010571	6.90989	0.00831601	9.83891	0.00109193
10N	RFX8	2	30.7917			10N	BHLHE40	24.2373	24.2823	24.2598	2.44569	0.183559	2.79183	0.144403	5.72085	0.0189606
10N	SHC3	1	30.5258			10N	ATP10A	28.3235	28.3708	28.3471	6.53303	0.0107985	6.87917	0.008495	9.80819	0.00111543
10N	SHC3	2	30.0008			10N	COL26A1-2	31.5835	31.1917	31.3876	9.5735	0.00131247	9.91965	0.0010325	12.8487	0.000135571
10N	CDH13	1	28.5716			10N	FAM178B	32.0792	31.6379	31.8586	10.0444	0.000946933	10.3906	0.000744937	13.3196	9.78132e-05
10N	CDH13	2	27.9843			10N	GRM5-2	33.9105	35.239	34.5747	12.7606	0.000144101	13.1068	0.000113362	16.0358	1.48849e-05
10N	DRAXIN	1	34.616			10N	LIPH	34.102	33.2378	33.6699	11.8558	0.000269802	12.202	0.000212249	15.131	2.78692e-05
10N	DRAXIN	2	36.0248			10N	NRCAM	25.6198	26.9536	26.2867	4.47259	0.0450419	4.81873	0.0354337	7.74775	0.00465259
10N	RAB27A	1	24.8877			10N	NELL2	26.7731	26.8276	26.8004	4.98625	0.0315493	5.33239	0.0248193	8.26141	0.00325887
10N	RAB27A	2	24.8956			10N	RIN1	30.4616	29.8186	30.1401	8.32602	0.00311616	8.67216	0.00245143	11.6012	0.000321883
10N	C8orf44 SGK3	1	30.2296			10N	LRP4	29.3317	28.9093	29.1205	7.30638	0.00631774	7.65252	0.00497006	10.5815	0.000652589
10N	C8orf44 SGK3	2	30.1372			10N	VDR	28.4188	28.5029	28.4608	6.64674	0.00998004	6.99288	0.00785113	9.9219	0.00103089
10N	HTR7-2	1	29.2705			10N	TPO	20.6631	20.9409	20.802	-1.01209	2.01683	-0.665942	1.5866	2.26307	0.208327
10N	HTR7-2	2	29.3054			10N	TP63	28.6315	28.3858	28.5086	6.69451	0.00965502	7.04065	0.00759544	9.96967	0.000997312
10N	GABBR2	1	33.3611			10N	TNIK	26.4319	26.404	26.418	4.60385	0.0411248	4.94999	0.0323522	7.87901	0.00424797
10N	GABBR2	2	33.1015			10N	KRT19	26.9589	26.6777	26.8183	5.00419	0.0311595	5.35033	0.0245126	8.27935	0.00321861
10N	DPP4-2	1	28.2759			10N	GAP43	32.2579	31.7655	32.0117	10.1976	0.000851571	10.5437	0.000669917	13.4727	8.79627e-05
10N	DPP4-2	2	28.4798			10N	MATN2	23.94	24.0136	23.9768	2.16267	0.223342	2.50882	0.175699	5.43784	0.02307
10N	BHLHE40	1	24.2373			10N	E2F1	27.0268	27.1549	27.0909	5.27677	0.0257949	5.62291	0.0202925	8.55193	0.00266448
10N	BHLHE40	2	24.2823			10N	CDH16	25.7098	25.6805	25.6952	3.88105	0.0678717	4.22719	0.0533936	7.15621	0.00701079
10N	ATP10A	1	28.3235			10N	ALK	33.2354	33.8049	33.5202	11.7061	0.000299313	12.0522	0.000235465	14.9812	3.09175e-05
10N	ATP10A	2	28.3708			10N	ADRA1B-2	32.2183	32.9587	32.5885	10.7744	0.000570939	11.1205	0.000449149	14.0495	5.8975e-05
10N	COL26A1-2	1	31.5835			10N	ABTB2-2	29.0595	28.9547	29.0071	7.193	0.00683427	7.53914	0.0053764	10.4682	0.000705943
10N	COL26A1-2	2	31.1917			10N	CHST2-2	26.4801	26.4669	26.4735	4.65937	0.0395722	5.00551	0.0311308	7.93453	0.0040876
10N	FAM178B	1	32.0792			10N	NPC2	21.9889	21.7811	21.885	0.0709	0.952044	0.417045	0.748957	3.34606	0.0983411
10N	FAM178B	2	31.6379			10N	RPP15-3	28.0993	30.0924	29.0959	7.28178	0.00642638	7.62792	0.00505553	10.5569	0.000663811
10N	GRM5-2	1	33.9105			10N	RUNX1	24.3017	24.1608	24.2312	2.41713	0.187228	2.76327	0.14729	5.69229	0.0193397
10N	GRM5-2	2	35.239			10N	SLC1A5	28.0053	28.3875	28.1964	6.38228	0.0119879	6.72842	0.00943068	9.65744	0.00123829
10N	LIPH	1	34.102			10N	ITGA2	28.1952	28.0125	28.1039	6.28974	0.012782	6.63589	0.0100554	9.56491	0.00132031
10N	LIPH	2	33.2378			10N	SHC4	31.0004	31.6762	31.3383	9.52421	0.00135809	9.87035	0.00106839	12.7994	0.000140283
10N	NRCAM	1	25.6198			10N	STAC	32.068	32.8221	32.4451	10.631	0.000630607	10.9771	0.000496088	13.9061	6.51384e-05
10N	NRCAM	2	26.9536			10N	SPOCD1-2	33.6023	35.2104	34.4063	12.5922	0.000161943	12.9384	0.000127398	15.8674	1.67278e-05
10N	NELL2	1	26.7731			10N	TFCP2L1	24.9529	24.8514	24.9022	3.08808	0.117597	3.43422	0.0925116	6.36324	0.0121471
10N	NELL2	2	26.8276			10N	SLC25A21	31.9626	31.4055	31.684	9.86992	0.0010687	10.2161	0.000840733	13.1451	0.000110392
10N	RIN1	1	30.4616			10N	TNC	28.5262	28.0416	28.2839	6.46978	0.0112824	6.81592	0.00887571	9.74494	0.00116542
10N	RIN1	2	29.8186			10N	TIAM1-2	27.4597	26.8632	27.1615	5.34735	0.0245634	5.69349	0.0193236	8.62251	0.00253727
10N	LRP4	1	29.3317			10N	GALNT7	25.3436	25.4077	25.3756	3.56153	0.0846978	3.90768	0.0666304	6.83669	0.00874884
10N	LRP4	2	28.9093			10N	DUSP6	29.4222	29.3102	29.3662	7.55206	0.00532848	7.8982	0.00419183	10.8272	0.000550404
10N	VDR	1	28.4188			10N	GALNTL6-2	35.0385	35.3632	35.2008	13.3867	9.33669e-05	13.7329	7.34502e-05	16.6619	9.64431e-06
10N	VDR	2	28.5029			10N	KIAA1549L-2	33.6922	33.1588	33.4255	11.6114	0.000319613	11.9575	0.000251434	14.8865	3.30143e-05
10N	TPO	1	20.6631			10N	GAPDH	21.8881	21.7401	21.8141
10N	TPO	2	20.9409			10N	OAZ1	21.2729	21.663	21.468
10N	TP63	1	28.6315			10N	β-actin	18.6999	18.378	18.5389
10N	TP63	2	28.3858			16N	RUNX2	30.9198	29.5838	30.2518	6.03212	0.015281	7.21627	0.00672491	8.81987	0.00221287
10N	TNIK	1	26.4319			16N	MCF2L2-2	35.867	33.5424	34.7047	10.485	0.000697742	11.6692	0.000307065	13.2728	0.000101042
10N	TNIK	2	26.404			16N	NRP2	29.0153	28.6538	28.8346	4.61488	0.0408114	5.79903	0.0179604	7.40263	0.00590999
10N	KRT19	1	26.9589			16N	RASD2-2	31.4023	31.1821	31.2922	7.07253	0.00742946	8.25668	0.00326959	9.86027	0.00107588
10N	KRT19	2	26.6777			16N	SFTPB	29.3777	29.2975	29.3376	5.1179	0.0287977	6.30205	0.0126734	7.90565	0.00417026
10N	GAP43	1	32.2579			16N	MET	27.8053	27.6777	27.7415	3.52182	0.0870615	4.70597	0.0383144	6.30957	0.0126076
10N	GAP43	2	31.7655			16N	RFX8	34.8316	34.2654	34.5485	10.3288	0.000777517	11.513	0.000342173	13.1166	0.000112594
10N	MATN2	1	23.94			16N	SHC3	31.3941	31.9852	31.6897	7.46999	0.0056404	8.65413	0.00248225	10.2577	0.000816799
10N	MATN2	2	24.0136			16N	CDH13	30.1207	30.0657	30.0932	5.87352	0.0170567	7.05767	0.00750636	8.66127	0.00247001
10N	E2F1	1	27.0268			16N	DRAXIN	34.4041	36.0576	35.2309	11.0112	0.000484516	12.1953	0.000213228	13.7989	7.01638e-05
10N	E2F1	2	27.1549			16N	RAB27A	27.6949	27.2394	27.4672	3.24748	0.105296	4.43163	0.046339	6.03522	0.0152481
10N	CDH16	1	25.7098			16N	C8orf44 SGK3	33.5641	33.7438	33.654	9.43427	0.00144544	10.6184	0.000636116	12.222	0.000209318
10N	CDH16	2	25.6805			16N	HTR7-2	36.87	35.4689	36.1694	11.9498	0.000252791	13.1339	0.000111249	14.7375	3.66073e-05
10N	ALK	1	33.2354			16N	GABBR2	32.6861	32.6921	32.6891	8.46946	0.00282123	9.65361	0.00124158	11.2572	0.000408549
10N	ALK	2	33.8049			16N	DPP4-2	29.2186	29.6542	29.4364	5.21668	0.026892	6.40083	0.0118347	8.00442	0.00389429
10N	ADRA1B-2	1	32.2183			16N	BHLHE40	26.8091	27.0072	26.9081	2.68845	0.15513	3.8726	0.0682701	5.4762	0.0224647
10N	ADRA1B-2	2	32.9587			16N	ATP10A	31.2463	29.7924	30.5194	6.29968	0.0126942	7.48383	0.00558652	9.08743	0.00183828
10N	ABTB2-2	1	29.0595			16N	COL26A1-2	33.6577	37.8143	35.736	11.5163	0.000341383	12.7005	0.000150237	14.3041	4.94364e-05
10N	ABTB2-2	2	28.9547			16N	FAM178B	34.0986	34.7724	34.4355	10.2158	0.000840882	11.4	0.000370059	13.0036	0.00012177
10N	CHST2-2	1	26.4801			16N	GRM5-2	Undetermined	28.6372	28.6372	4.41755	0.0467933	5.6017	0.020593	7.2053	0.00677624
10N	CHST2-2	2	26.4669			16N	LIPH	31.3782	31.899	31.6386	7.41895	0.00584349	8.6031	0.00257163	10.2067	0.00084621
10N	NPC2	1	21.9889			16N	NRCAM	28.8707	27.0286	27.9496	3.72994	0.075366	4.91409	0.0331674	6.51769	0.0109139
10N	NPC2	2	21.7811			16N	NELL2	27.3929	27.3531	27.373	3.15332	0.112398	4.33747	0.0494644	5.94106	0.0162766
10N	RPP15-3	1	28.0993			16N	RIN1	32.6518	32.3541	32.5029	8.28325	0.0032099	9.4674	0.00141263	11.071	0.000464833
10N	RPP15-3	2	30.0924			16N	LRP4	30.0413	29.9993	30.0203	5.80062	0.0179407	6.98477	0.00789543	8.58836	0.00259804
10N	RUNX1	1	24.3017			16N	VDR	32.0324	31.9059	31.9692	7.74949	0.00464697	8.93364	0.00204506	10.5372	0.000672938
10N	RUNX1	2	24.1608			16N	TPO	21.8398	21.619	21.7294	-2.49031	5.61898	-1.30616	2.47282	0.297436	0.813697
10N	SLC1A5	1	28.0053			16N	TP63	32.2287	33.518	32.8734	8.65368	0.00248303	9.83783	0.00109274	11.4414	0.000359574
10N	SLC1A5	2	28.3875			16N	TNIK	29.8648	29.6396	29.7522	5.53248	0.0216051	6.71663	0.00950807	8.32023	0.00312869
10N	ITGA2	1	28.1952			16N	KRT19	26.5413	26.3903	26.4658	2.24613	0.210789	3.43027	0.092765	5.03387	0.0305249
10N	ITGA2	2	28.0125			16N	GAP43	30.6361	30.9977	30.8169	6.59719	0.0103288	7.78134	0.00454553	9.38493	0.00149573
10N	SHC4	1	31.0004			16N	MATN2	25.2638	25.1208	25.1923	0.972611	0.509583	2.15676	0.224259	3.76036	0.0737938
10N	SHC4	2	31.6762			16N	E2F1	32.9717	32.6863	32.829	8.60931	0.00256058	9.79346	0.00112687	11.3971	0.000370803
10N	STAC	1	32.068			16N	CDH16	27.2902	27.0465	27.1684	2.94868	0.129526	4.13283	0.0570026	5.73643	0.018757
10N	STAC	2	32.8221			16N	ALK	Undetermined	35.8725	35.8725	11.6528	0.000310571	12.8369	0.000136677	14.4405	4.49745e-05
10N	SPOCD1-2	1	33.6023			16N	ADRA1B-2	33.5534	35.0212	34.2873	10.0676	0.000931851	11.2518	0.000410093	12.8554	0.000134943
10N	SPOCD1-2	2	35.2104			16N	ABTB2-2	31.3636	30.9435	31.1536	6.93387	0.00817892	8.11802	0.00359941	9.72162	0.00118441
10N	TFCP2L1	1	24.9529			16N	CHST2-2	28.9699	28.9609	28.9654	4.74572	0.0372731	5.92987	0.0164033	7.53347	0.0053976
10N	TFCP2L1	2	24.8514			16N	NPC2	23.6946	23.9338	23.8142	-0.405438	1.32449	0.77871	0.582888	2.38231	0.191803
10N	SLC25A21	1	31.9626			16N	RPP15-3	30.5096	30.9838	30.7467	6.52701	0.0108436	7.71116	0.00477211	9.31475	0.00157029
10N	SLC25A21	2	31.4055			16N	RUNX1	28.3115	28.7463	28.5289	4.30924	0.0504417	5.49339	0.0221986	7.09698	0.00730457
10N	TNC	1	28.5262			16N	SLC1A5	32.2507	31.4994	31.8751	7.65538	0.00496023	8.83953	0.00218292	10.4431	0.000718301
10N	TNC	2	28.0416			16N	ITGA2	30.4982	30.2588	30.3785	6.15878	0.0139966	7.34293	0.00615967	8.94653	0.00202688
10N	TIAM1-2	1	27.4597			16N	SHC4	34.4663	34.6706	34.5684	10.3488	0.000766853	11.5329	0.00033748	13.1365	0.00011105
10N	TIAM1-2	2	26.8632			16N	STAC	34.7704	33.8957	34.3331	10.1134	0.000902756	11.2975	0.000397288	12.9011	0.00013073
10N	GALNT7	1	25.3436			16N	SPOCD1-2	Undetermined	34.167	34.167	9.94733	0.00101287	11.1315	0.000445748	12.7351	0.000146676
10N	GALNT7	2	25.4077			16N	TFCP2L1	26.6216	26.701	26.6613	2.44161	0.184078	3.62576	0.0810098	5.22935	0.0266568
10N	DUSP6	1	29.4222			16N	SLC25A21	31.9735	32.4602	32.2169	7.99718	0.0039139	9.18133	0.00172244	10.7849	0.00056678
10N	DUSP6	2	29.3102			16N	TNC	33.0152	33.1635	33.0893	8.86965	0.00213781	10.0538	0.000940818	11.6574	0.000309582
10N	GALNTL6-2	1	35.0385			16N	TIAM1-2	30.9663	30.68	30.8231	6.60345	0.010284	7.7876	0.00452584	9.39119	0.00148926
10N	GALNTL6-2	2	35.3632			16N	GALNT7	27.9149	27.7975	27.8562	3.6365	0.0804089	4.82065	0.0353867	6.42425	0.0116442
10N	KIAA1549L-2	1	33.6922			16N	DUSP6	31.9762	31.8612	31.9187	7.69902	0.00481244	8.88316	0.00211788	10.4868	0.0006969
10N	KIAA1549L-2	2	33.1588			16N	GALNTL6-2	Undetermined	36.0945	36.0945	11.8749	0.000266263	13.059	0.000117178	14.6626	3.85582e-05
10N	OAZ1	1	21.2729			16N	KIAA1549L-2	34.1938	39.5695	36.8816	12.6619	0.000154303	13.8461	6.79063e-05	15.4497	2.2345e-05
10N	OAZ1	2	21.663			16N	GAPDH	24.2399	24.1994	24.2197
10N	β-actin	1	18.6999			16N	OAZ1	23.0837	22.9874	23.0355
10N	β-actin	2	18.378			16N	β-actin	21.2374	21.6264	21.4319
16N	RUNX2	1	30.9198			16T	RUNX2	27.0954	26.9355	27.0154	7.04882	0.00755254	7.27535	0.00645508	8.65466	0.00248136
16N	RUNX2	2	29.5838			16T	MCF2L2-2	30.306	30.4076	30.3568	10.3902	0.000745149	10.6167	0.000636871	11.996	0.000244816
16N	MCF2L2-2	1	35.867			16T	NRP2	24.4714	24.8762	24.6738	4.7072	0.0382818	4.93372	0.0327191	6.31303	0.0125773
16N	MCF2L2-2	2	33.5424			16T	RASD2-2	25.8487	25.6152	25.7319	5.76529	0.0183855	5.99182	0.0157139	7.37112	0.00604047
16N	NRP2	1	29.0153			16T	SFTPB	20.9602	21.3808	21.1705	1.20386	0.434113	1.43038	0.371032	2.80969	0.142626
16N	NRP2	2	28.6538			16T	MET	21.7962	21.8273	21.8117	1.84513	0.27833	2.07166	0.237886	3.45096	0.0914442
16N	RASD2-2	1	31.4023			16T	RFX8	29.22	29.3059	29.263	9.29634	0.00159046	9.52286	0.00135935	10.9022	0.00052254
16N	RASD2-2	2	31.1821			16T	SHC3	26.4128	26.4804	26.4466	6.47997	0.011203	6.70649	0.00957513	8.0858	0.00368071
16N	SFTPB	1	29.3777			16T	CDH13	24.614	24.6087	24.6113	4.64472	0.039976	4.87125	0.0341671	6.25056	0.013134
16N	SFTPB	2	29.2975			16T	DRAXIN	30.1326	31.3034	30.718	10.7514	0.000580124	10.9779	0.000495826	12.3572	0.000190597
16N	MET	1	27.8053			16T	RAB27A	22.2583	22.3388	22.2986	2.33196	0.198614	2.55849	0.169753	3.9378	0.0652537
16N	MET	2	27.6777			16T	C8orf44 SGK3	29.9341	29.8472	29.8907	9.92404	0.00102935	10.1506	0.000879779	11.5299	0.00033819
16N	GAPDH	1	24.2399			16T	HTR7-2	30.3923	30.1759	30.2841	10.3175	0.000783659	10.544	0.000669785	11.9233	0.000257468
16N	GAPDH	2	24.1994			16T	GABBR2	25.4944	25.5286	25.5115	5.54492	0.0214196	5.77145	0.0183071	7.15076	0.00703733
16N	RFX8	1	34.8316			16T	DPP4-2	22.0347	21.9759	22.0053	2.03868	0.243386	2.26521	0.208019	3.64452	0.0799633
16N	RFX8	2	34.2654			16T	BHLHE40	22.0778	21.9938	22.0358	2.06917	0.238297	2.29569	0.20367	3.675	0.0782915
16N	SHC3	1	31.3941			16T	ATP10A	25.8162	26.0268	25.9215	5.95488	0.0161214	6.1814	0.0137788	7.56071	0.00529663
16N	SHC3	2	31.9852			16T	COL26A1-2	29.0404	29.2503	29.1454	9.17876	0.00172552	9.40528	0.00147478	10.7846	0.000566912
16N	CDH13	1	30.1207			16T	FAM178B	27.8211	27.5871	27.7041	7.73748	0.00468584	7.964	0.00400494	9.34331	0.00153951
16N	CDH13	2	30.0657			16T	GRM5-2	32.5732	32.1222	32.3477	12.3811	0.000187466	12.6076	0.000160225	13.9869	6.15913e-05
16N	DRAXIN	1	34.4041			16T	LIPH	23.6511	23.5649	23.608	3.64141	0.0801359	3.86794	0.0684913	5.24724	0.0263283
16N	DRAXIN	2	36.0576			16T	NRCAM	22.6269	22.61	22.6184	2.65182	0.159119	2.87835	0.135997	4.25766	0.0522779
16N	RAB27A	1	27.6949			16T	NELL2	23.9739	23.9798	23.9769	4.01025	0.0620575	4.23678	0.0530399	5.61608	0.0203887
16N	RAB27A	2	27.2394			16T	RIN1	28.3986	28.2906	28.3446	8.37795	0.00300597	8.60448	0.00256918	9.98378	0.000987601
16N	C8orf44 SGK3	1	33.5641			16T	LRP4	24.7272	24.6551	24.6912	4.72454	0.0378244	4.95107	0.0323281	6.33037	0.0124271
16N	C8orf44 SGK3	2	33.7438			16T	VDR	27.6721	27.4618	27.567	7.60035	0.00515307	7.82688	0.00440427	9.20619	0.00169302
16N	HTR7-2	1	36.87			16T	TPO	23.6714	23.6347	23.6531	3.68644	0.0776732	3.91297	0.0663865	5.29227	0.0255192
16N	HTR7-2	2	35.4689			16T	TP63	27.3415	27.0878	27.2146	7.24802	0.0065785	7.47455	0.00562258	8.85386	0.00216134
16N	GABBR2	1	32.6861			16T	TNIK	23.935	23.8603	23.8977	3.93106	0.0655592	4.15758	0.0560328	5.53689	0.0215392
16N	GABBR2	2	32.6921			16T	KRT19	20.6529	20.6669	20.6599	0.693263	0.618453	0.91979	0.528586	2.2991	0.20319
16N	DPP4-2	1	29.2186			16T	GAP43	28.4678	28.6342	28.551	8.58438	0.00260521	8.81091	0.00222665	10.1902	0.000855931
16N	DPP4-2	2	29.6542			16T	MATN2	25.7146	25.8332	25.7739	5.80725	0.0178584	6.03378	0.0152634	7.41309	0.00586731
16N	BHLHE40	1	26.8091			16T	E2F1	27.5939	27.6248	27.6093	7.64272	0.00500395	7.86924	0.00427682	9.24855	0.00164403
16N	BHLHE40	2	27.0072			16T	CDH16	29.9829	29.8821	29.9325	9.96587	0.000999944	10.1924	0.000854642	11.5717	0.000328528
16N	ATP10A	1	31.2463			16T	ALK	26.8082	28.2517	27.53	7.56335	0.00528694	7.78988	0.00451869	9.16918	0.001737
16N	ATP10A	2	29.7924			16T	ADRA1B-2	31.0905	30.6149	30.8527	10.886	0.000528416	11.1126	0.000451632	12.4919	0.000173609
16N	COL26A1-2	1	33.6577			16T	ABTB2-2	26.5809	26.5417	26.5613	6.59469	0.0103467	6.82121	0.00884321	8.20052	0.00339936
16N	COL26A1-2	2	37.8143			16T	CHST2-2	23.623	23.6803	23.6516	3.68502	0.0777499	3.91154	0.066452	5.29085	0.0255444
16N	FAM178B	1	34.0986			16T	NPC2	18.1872	18.2213	18.2042	-1.76238	3.39257	-1.53585	2.8996	-0.156548	1.11462
16N	FAM178B	2	34.7724			16T	RPP15-3	25.9863	25.6363	25.8113	5.84469	0.017401	6.07121	0.0148724	7.45052	0.00571702
16N	GRM5-2	1	Undetermined			16T	RUNX1	22.3968	22.2155	22.3061	2.33952	0.197575	2.56605	0.168866	3.94536	0.0649126
16N	GRM5-2	2	28.6372			16T	SLC1A5	27.1777	27.4197	27.2987	7.33208	0.00620618	7.55861	0.00530436	8.93791	0.00203902
16N	LIPH	1	31.3782			16T	ITGA2	22.5585	22.6064	22.5824	2.61582	0.16314	2.84234	0.139434	4.22165	0.0535991
16N	LIPH	2	31.899			16T	SHC4	31.5219	31.927	31.7244	11.7578	0.000288766	11.9843	0.000246806	13.3636	9.4873e-05
16N	NRCAM	1	28.8707			16T	STAC	27.6472	27.9844	27.8158	7.84921	0.00433662	8.07574	0.00370646	9.45505	0.00142478
16N	NRCAM	2	27.0286			16T	SPOCD1-2	28.8451	28.884	28.8645	8.89792	0.00209632	9.12445	0.00179171	10.5038	0.000688738
16N	NELL2	1	27.3929			16T	TFCP2L1	27.6842	27.3603	27.5222	7.5556	0.00531543	7.78213	0.00454304	9.16143	0.00174636
16N	NELL2	2	27.3531			16T	SLC25A21	28.6677	28.4382	28.553	8.58634	0.00260168	8.81287	0.00222363	10.1922	0.000854772
16N	RIN1	1	32.6518			16T	TNC	25.9321	25.9902	25.9611	5.99452	0.0156845	6.22105	0.0134054	7.60035	0.00515307
16N	RIN1	2	32.3541			16T	TIAM1-2	25.5298	25.3594	25.4446	5.478	0.0224366	5.70453	0.0191764	7.08383	0.00737147
16N	LRP4	1	30.0413			16T	GALNT7	22.0312	21.8599	21.9455	1.97893	0.253679	2.20545	0.216816	3.58476	0.083345
16N	LRP4	2	29.9993			16T	DUSP6	26.2149	26.0151	26.115	6.14841	0.0140976	6.37493	0.0120491	7.75424	0.00463171
16N	VDR	1	32.0324			16T	GALNTL6-2	38.5087	32.5948	35.5518	15.5851	2.03425e-05	15.8117	1.73865e-05	17.191	6.68343e-06
16N	VDR	2	31.9059			16T	KIAA1549L-2	32.0264	32.5122	32.2693	12.3027	0.000197935	12.5292	0.000169173	13.9085	6.50306e-05
16N	TPO	1	21.8398			16T	GAPDH	19.9405	19.9927	19.9666
16N	TPO	2	21.619			16T	OAZ1	19.5272	19.9529	19.7401
16N	TP63	1	32.2287			16T	β-actin	18.5294	18.1922	18.3608
16N	TP63	2	33.518
16N	TNIK	1	29.8648
16N	TNIK	2	29.6396
16N	KRT19	1	26.5413
16N	KRT19	2	26.3903
16N	GAP43	1	30.6361
16N	GAP43	2	30.9977
16N	MATN2	1	25.2638
16N	MATN2	2	25.1208
16N	E2F1	1	32.9717
16N	E2F1	2	32.6863
16N	CDH16	1	27.2902
16N	CDH16	2	27.0465
16N	ALK	1	Undetermined
16N	ALK	2	35.8725
16N	ADRA1B-2	1	33.5534
16N	ADRA1B-2	2	35.0212
16N	ABTB2-2	1	31.3636
16N	ABTB2-2	2	30.9435
16N	CHST2-2	1	28.9699
16N	CHST2-2	2	28.9609
16N	NPC2	1	23.6946
16N	NPC2	2	23.9338
16N	RPP15-3	1	30.5096
16N	RPP15-3	2	30.9838
16N	RUNX1	1	28.3115
16N	RUNX1	2	28.7463
16N	SLC1A5	1	32.2507
16N	SLC1A5	2	31.4994
16N	ITGA2	1	30.4982
16N	ITGA2	2	30.2588
16N	SHC4	1	34.4663
16N	SHC4	2	34.6706
16N	STAC	1	34.7704
16N	STAC	2	33.8957
16N	SPOCD1-2	1	Undetermined
16N	SPOCD1-2	2	34.167
16N	TFCP2L1	1	26.6216
16N	TFCP2L1	2	26.701
16N	SLC25A21	1	31.9735
16N	SLC25A21	2	32.4602
16N	TNC	1	33.0152
16N	TNC	2	33.1635
16N	TIAM1-2	1	30.9663
16N	TIAM1-2	2	30.68
16N	GALNT7	1	27.9149
16N	GALNT7	2	27.7975
16N	DUSP6	1	31.9762
16N	DUSP6	2	31.8612
16N	GALNTL6-2	1	Undetermined
16N	GALNTL6-2	2	36.0945
16N	KIAA1549L-2	1	34.1938
16N	KIAA1549L-2	2	39.5695
16N	OAZ1	1	23.0837
16N	OAZ1	2	22.9874
16N	β-actin	1	21.2374
16N	β-actin	2	21.6264
16T	RUNX2	1	27.0954
16T	RUNX2	2	26.9355
16T	MCF2L2-2	1	30.306
16T	MCF2L2-2	2	30.4076
16T	NRP2	1	24.4714
16T	NRP2	2	24.8762
16T	RASD2-2	1	25.8487
16T	RASD2-2	2	25.6152
16T	SFTPB	1	20.9602
16T	SFTPB	2	21.3808
16T	MET	1	21.7962
16T	MET	2	21.8273
16T	GAPDH	1	19.9405
16T	GAPDH	2	19.9927
16T	RFX8	1	29.22
16T	RFX8	2	29.3059
16T	SHC3	1	26.4128
16T	SHC3	2	26.4804
16T	CDH13	1	24.614
16T	CDH13	2	24.6087
16T	DRAXIN	1	30.1326
16T	DRAXIN	2	31.3034
16T	RAB27A	1	22.2583
16T	RAB27A	2	22.3388
16T	C8orf44 SGK3	1	29.9341
16T	C8orf44 SGK3	2	29.8472
16T	HTR7-2	1	30.3923
16T	HTR7-2	2	30.1759
16T	GABBR2	1	25.4944
16T	GABBR2	2	25.5286
16T	DPP4-2	1	22.0347
16T	DPP4-2	2	21.9759
16T	BHLHE40	1	22.0778
16T	BHLHE40	2	21.9938
16T	ATP10A	1	25.8162
16T	ATP10A	2	26.0268
16T	COL26A1-2	1	29.0404
16T	COL26A1-2	2	29.2503
16T	FAM178B	1	27.8211
16T	FAM178B	2	27.5871
16T	GRM5-2	1	32.5732
16T	GRM5-2	2	32.1222
16T	LIPH	1	23.6511
16T	LIPH	2	23.5649
16T	NRCAM	1	22.6269
16T	NRCAM	2	22.61
16T	NELL2	1	23.9739
16T	NELL2	2	23.9798
16T	RIN1	1	28.3986
16T	RIN1	2	28.2906
16T	LRP4	1	24.7272
16T	LRP4	2	24.6551
16T	VDR	1	27.6721
16T	VDR	2	27.4618
16T	TPO	1	23.6714
16T	TPO	2	23.6347
16T	TP63	1	27.3415
16T	TP63	2	27.0878
16T	TNIK	1	23.935
16T	TNIK	2	23.8603
16T	KRT19	1	20.6529
16T	KRT19	2	20.6669
16T	GAP43	1	28.4678
16T	GAP43	2	28.6342
16T	MATN2	1	25.7146
16T	MATN2	2	25.8332
16T	E2F1	1	27.5939
16T	E2F1	2	27.6248
16T	CDH16	1	29.9829
16T	CDH16	2	29.8821
16T	ALK	1	26.8082
16T	ALK	2	28.2517
16T	ADRA1B-2	1	31.0905
16T	ADRA1B-2	2	30.6149
16T	ABTB2-2	1	26.5809
16T	ABTB2-2	2	26.5417
16T	CHST2-2	1	23.623
16T	CHST2-2	2	23.6803
16T	NPC2	1	18.1872
16T	NPC2	2	18.2213
16T	RPP15-3	1	25.9863
16T	RPP15-3	2	25.6363
16T	RUNX1	1	22.3968
16T	RUNX1	2	22.2155
16T	SLC1A5	1	27.1777
16T	SLC1A5	2	27.4197
16T	ITGA2	1	22.5585
16T	ITGA2	2	22.6064
16T	SHC4	1	31.5219
16T	SHC4	2	31.927
16T	STAC	1	27.6472
16T	STAC	2	27.9844
16T	SPOCD1-2	1	28.8451
16T	SPOCD1-2	2	28.884
16T	TFCP2L1	1	27.6842
16T	TFCP2L1	2	27.3603
16T	SLC25A21	1	28.6677
16T	SLC25A21	2	28.4382
16T	TNC	1	25.9321
16T	TNC	2	25.9902
16T	TIAM1-2	1	25.5298
16T	TIAM1-2	2	25.3594
16T	GALNT7	1	22.0312
16T	GALNT7	2	21.8599
16T	DUSP6	1	26.2149
16T	DUSP6	2	26.0151
16T	GALNTL6-2	1	38.5087
16T	GALNTL6-2	2	32.5948
16T	KIAA1549L-2	1	32.0264
16T	KIAA1549L-2	2	32.5122
16T	OAZ1	1	19.5272
16T	OAZ1	2	19.9529
16T	β-actin	1	18.5294
16T	β-actin	2	18.1922

## Sheet: P3
Raw data (P3)						Data processing (P3)
Sample	Target	Task	CT			Sample	Target	CT1	CT2	Mean CT	△Ct	Relative expression (relative to GAPDH)	△Ct	Relative expression (relative to OAZ1)	△Ct	Relative expression (relative to β-actin)
35N	RUNX2	1	28.7207			35N	RUNX2	28.7207	28.7731	28.7469	7.4718	0.00563332	8.02398	0.00384186	10.6579	0.000618926
35N	RUNX2	2	28.7731			35N	MCF2L2-2	33.7585	33.8613	33.8099	12.5348	0.000168525	13.0869	0.000114932	15.7209	1.85156e-05
35N	MCF2L2-2	1	33.7585			35N	NRP2	25.9624	26.0977	26.03	4.75494	0.0370358	5.30712	0.025258	7.94108	0.00406908
35N	MCF2L2-2	2	33.8613			35N	RASD2-2	28.303	28.8271	28.565	7.28993	0.00639016	7.84211	0.00435802	10.4761	0.000702079
35N	NRP2	1	25.9624			35N	SFTPB	22.3761	22.4116	22.3939	1.11876	0.460491	1.67094	0.314049	4.3049	0.0505935
35N	NRP2	2	26.0977			35N	MET	24.2291	24.2686	24.2489	2.97377	0.127293	3.52595	0.0868125	6.15992	0.0139855
35N	RASD2-2	1	28.303			35N	RFX8	30.3818	30.4865	30.4341	9.15903	0.00174927	9.71122	0.00119298	12.3452	0.00019219
35N	RASD2-2	2	28.8271			35N	SHC3	29.3401	29.04	29.1901	7.91496	0.00414342	8.46714	0.00282576	11.1011	0.000455232
35N	SFTPB	1	22.3761			35N	CDH13	28.1919	27.7265	27.9592	6.68409	0.00972494	7.23627	0.0066323	9.87024	0.00106847
35N	SFTPB	2	22.4116			35N	DRAXIN	33.204	33.3918	33.2979	12.0228	0.000240312	12.575	0.00016389	15.209	2.64028e-05
35N	MET	1	24.2291			35N	RAB27A	24.8951	24.7632	24.8292	3.55407	0.0851367	4.10625	0.0580623	6.74022	0.00935387
35N	MET	2	24.2686			35N	C8orf44 SGK3	29.9162	29.8925	29.9044	8.62924	0.00252545	9.18143	0.00172233	11.8154	0.000277468
35N	GAPDH	1	21.3309			35N	HTR7-2	32.5744	32.081	32.3277	11.0526	0.000470808	11.6048	0.000321086	14.2387	5.17271e-05
35N	GAPDH	2	21.2193			35N	GABBR2	30.525	30.1043	30.3147	9.03954	0.00190032	9.59172	0.001296	12.2257	0.000208786
35N	RFX8	1	30.3818			35N	DPP4-2	28.3842	28.5172	28.4507	7.17555	0.00691741	7.72773	0.0047176	10.3617	0.000760007
35N	RFX8	2	30.4865			35N	BHLHE40	24.0017	23.9748	23.9883	2.71315	0.152497	3.26533	0.104001	5.8993	0.0167546
35N	SHC3	1	29.3401			35N	ATP10A	28.3708	28.6557	28.5133	7.23814	0.00662371	7.79032	0.0045173	10.4243	0.000727739
35N	SHC3	2	29.04			35N	COL26A1-2	31.4553	31.2575	31.3564	10.0813	0.00092307	10.6335	0.000629523	13.2674	0.000101417
35N	CDH13	1	28.1919			35N	FAM178B	33.3624	31.6972	32.5298	11.2547	0.00040926	11.8069	0.000279111	14.4408	4.49649e-05
35N	CDH13	2	27.7265			35N	GRM5-2	Undetermined	34.5023	34.5023	13.2272	0.000104287	13.7793	7.11222e-05	16.4133	1.14578e-05
35N	DRAXIN	1	33.204			35N	LIPH	35.5232	34.2196	34.8714	13.5963	8.07439e-05	14.1485	5.50664e-05	16.7824	8.87124e-06
35N	DRAXIN	2	33.3918			35N	NRCAM	25.1595	25.7726	25.466	4.19092	0.0547531	4.7431	0.037341	7.37706	0.00601566
35N	RAB27A	1	24.8951			35N	NELL2	26.2724	26.3399	26.3062	5.03106	0.0305844	5.58324	0.0208582	8.21721	0.00336027
35N	RAB27A	2	24.7632			35N	RIN1	28.8178	28.7957	28.8068	7.53165	0.00540442	8.08383	0.00368575	10.7178	0.000593776
35N	C8orf44 SGK3	1	29.9162			35N	LRP4	27.9814	27.8789	27.9302	6.65507	0.00992258	7.20725	0.00676709	9.84122	0.00109018
35N	C8orf44 SGK3	2	29.8925			35N	VDR	27.8246	27.7548	27.7897	6.51459	0.0109374	7.06677	0.00745917	9.70074	0.00120168
35N	HTR7-2	1	32.5744			35N	TPO	18.0827	18.1549	18.1188	-3.15634	8.91564	-2.60416	6.08036	0.029809	0.97955
35N	HTR7-2	2	32.081			35N	TP63	28.4928	28.4277	28.4603	7.18517	0.00687146	7.73735	0.00468626	10.3713	0.000754959
35N	GABBR2	1	30.525			35N	TNIK	26.9804	26.9245	26.9524	5.67734	0.0195412	6.22952	0.0133269	8.86348	0.00214697
35N	GABBR2	2	30.1043			35N	KRT19	24.9789	24.8953	24.9371	3.662	0.0790004	4.21418	0.0538774	6.84814	0.00867968
35N	DPP4-2	1	28.3842			35N	GAP43	30.8867	30.6353	30.761	9.48591	0.00139462	10.0381	0.000951116	12.6721	0.000153225
35N	DPP4-2	2	28.5172			35N	MATN2	22.1849	22.0084	22.0966	0.82152	0.565846	1.3737	0.3859	4.00767	0.0621688
35N	BHLHE40	1	24.0017			35N	E2F1	29.0164	29.1913	29.1039	7.82874	0.00439858	8.38093	0.00299979	11.0149	0.000483267
35N	BHLHE40	2	23.9748			35N	CDH16	23.5844	23.5704	23.5774	2.30232	0.202737	2.8545	0.138264	5.48847	0.0222744
35N	ATP10A	1	28.3708			35N	ALK	33.8273	33.3218	33.5746	12.2994	0.00019838	12.8516	0.000135293	15.4856	2.17958e-05
35N	ATP10A	2	28.6557			35N	ADRA1B-2	30.972	31.5467	31.2594	9.98424	0.000987289	10.5364	0.00067332	13.1704	0.000108472
35N	COL26A1-2	1	31.4553			35N	ABTB2-2	29.166	28.9743	29.0701	7.79502	0.00450261	8.3472	0.00307073	10.9812	0.000494696
35N	COL26A1-2	2	31.2575			35N	CHST2-2	25.9789	25.9872	25.9831	4.70797	0.0382613	5.26015	0.0260938	7.89412	0.00420372
35N	FAM178B	1	33.3624			35N	NPC2	21.0235	21.0807	21.0521	-0.22298	1.16714	0.329201	0.795977	2.96317	0.128232
35N	FAM178B	2	31.6972			35N	RPP15-3	30.2594	29.5885	29.9239	8.64883	0.0024914	9.20101	0.00169911	11.835	0.000273727
35N	GRM5-2	1	Undetermined			35N	RUNX1	24.987	24.8175	24.9023	3.62715	0.0809316	4.17933	0.0551945	6.8133	0.00889186
35N	GRM5-2	2	34.5023			35N	SLC1A5	26.5842	26.6001	26.5921	5.31703	0.0250851	5.86921	0.0171078	8.50317	0.00275607
35N	LIPH	1	35.5232			35N	ITGA2	27.394	27.5428	27.4684	6.19327	0.0136659	6.74545	0.00932	9.37942	0.00150146
35N	LIPH	2	34.2196			35N	SHC4	32.7358	32.2533	32.4945	11.2194	0.000419391	11.7716	0.00028602	14.4056	4.60779e-05
35N	NRCAM	1	25.1595			35N	STAC	30.9768	31.7887	31.3827	10.1076	0.000906357	10.6598	0.000618125	13.2938	9.95804e-05
35N	NRCAM	2	25.7726			35N	SPOCD1-2	31.1747	31.882	31.5284	10.2533	0.000819338	10.8054	0.000558779	13.4394	9.00196e-05
35N	NELL2	1	26.2724			35N	TFCP2L1	22.2579	22.3802	22.319	1.04392	0.485009	1.5961	0.33077	4.23006	0.0532873
35N	NELL2	2	26.3399			35N	SLC25A21	29.0536	28.9756	29.0146	7.73952	0.00467922	8.2917	0.00319118	10.9257	0.0005141
35N	RIN1	1	28.8178			35N	TNC	28.4001	28.0416	28.2208	6.94574	0.00811193	7.49792	0.00553224	10.1319	0.000891247
35N	RIN1	2	28.7957			35N	TIAM1-2	28.697	29.0555	28.8763	7.60116	0.00515019	8.15334	0.00351237	10.7873	0.000565845
35N	LRP4	1	27.9814			35N	GALNT7	25.1509	24.9698	25.0603	3.78523	0.0725325	4.33741	0.0494664	6.97137	0.00796906
35N	LRP4	2	27.8789			35N	DUSP6	27.5543	27.5302	27.5422	6.26713	0.0129839	6.81931	0.00885489	9.45328	0.00142653
35N	VDR	1	27.8246			35N	GALNTL6-2	35.3466	31.2172	33.2819	12.0068	0.000242988	12.559	0.000165715	15.193	2.66968e-05
35N	VDR	2	27.7548			35N	KIAA1549L-2	33.0459	32.548	32.7969	11.5218	0.000340082	12.074	0.000231932	14.708	3.73644e-05
35N	TPO	1	18.0827			35N	GAPDH	21.3309	21.2193	21.2751
35N	TPO	2	18.1549			35N	OAZ1	20.8251	20.6208	20.7229
35N	TP63	1	28.4928			35N	β-actin	18.0543	18.1237	18.089
35N	TP63	2	28.4277
35N	TNIK	1	26.9804
35N	TNIK	2	26.9245
35N	KRT19	1	24.9789
35N	KRT19	2	24.8953
35N	GAP43	1	30.8867
35N	GAP43	2	30.6353
35N	MATN2	1	22.1849
35N	MATN2	2	22.0084
35N	E2F1	1	29.0164
35N	E2F1	2	29.1913
35N	CDH16	1	23.5844
35N	CDH16	2	23.5704
35N	ALK	1	33.8273
35N	ALK	2	33.3218
35N	ADRA1B-2	1	30.972
35N	ADRA1B-2	2	31.5467
35N	ABTB2-2	1	29.166
35N	ABTB2-2	2	28.9743
35N	CHST2-2	1	25.9789
35N	CHST2-2	2	25.9872
35N	NPC2	1	21.0235
35N	NPC2	2	21.0807
35N	RPP15-3	1	30.2594
35N	RPP15-3	2	29.5885
35N	RUNX1	1	24.987
35N	RUNX1	2	24.8175
35N	SLC1A5	1	26.5842
35N	SLC1A5	2	26.6001
35N	ITGA2	1	27.394
35N	ITGA2	2	27.5428
35N	SHC4	1	32.7358
35N	SHC4	2	32.2533
35N	STAC	1	30.9768
35N	STAC	2	31.7887
35N	SPOCD1-2	1	31.1747
35N	SPOCD1-2	2	31.882
35N	TFCP2L1	1	22.2579
35N	TFCP2L1	2	22.3802
35N	SLC25A21	1	29.0536
35N	SLC25A21	2	28.9756
35N	TNC	1	28.4001
35N	TNC	2	28.0416
35N	TIAM1-2	1	28.697
35N	TIAM1-2	2	29.0555
35N	GALNT7	1	25.1509
35N	GALNT7	2	24.9698
35N	DUSP6	1	27.5543
35N	DUSP6	2	27.5302
35N	GALNTL6-2	1	35.3466
35N	GALNTL6-2	2	31.2172
35N	KIAA1549L-2	1	33.0459
35N	KIAA1549L-2	2	32.548
35N	OAZ1	1	20.8251
35N	OAZ1	2	20.6208
35N	β-actin	1	18.0543
35N	β-actin	2	18.1237

## Sheet: P4
Raw data (P4)						Data processing (P4)
Sample	Target	Task	CT			Sample	Target	CT1	CT2	Mean CT	△Ct	Relative expression (relative to GAPDH)	△Ct	Relative expression (relative to OAZ1)	△Ct	Relative expression (relative to β-actin)
36N	RUNX2	1	28.3786			36N	RUNX2	28.3786	28.0169	28.1977	6.58848	0.0103913	7.80075	0.00448478	9.75494	0.00115736
36N	RUNX2	2	28.0169			36N	MCF2L2-2	33.4511	32.9575	33.2043	11.5951	0.000323242	12.8074	0.000139508	14.7616	3.60021e-05
36N	MCF2L2-2	1	33.4511			36N	NRP2	25.2544	25.1517	25.2031	3.59385	0.0828216	4.80611	0.035745	6.76031	0.00922453
36N	MCF2L2-2	2	32.9575			36N	RASD2-2	27.0453	26.9506	26.9979	5.38871	0.0238691	6.60098	0.0103017	8.55517	0.0026585
36N	NRP2	1	25.2544			36N	SFTPB	25.0966	24.9373	25.0169	3.40772	0.094227	4.61998	0.0406675	6.57417	0.0104948
36N	NRP2	2	25.1517			36N	MET	23.2225	23.0493	23.1359	1.52667	0.347077	2.73894	0.149795	4.69313	0.0386569
36N	RASD2-2	1	27.0453			36N	RFX8	31.3342	31.1429	31.2385	9.6293	0.00126267	10.8416	0.000544959	12.7958	0.000140635
36N	RASD2-2	2	26.9506			36N	SHC3	28.3107	28.354	28.3323	6.7231	0.00946551	7.93537	0.00408523	9.88956	0.00105425
36N	SFTPB	1	25.0966			36N	CDH13	26.5665	26.4161	26.4913	4.88206	0.0339119	6.09433	0.0146361	8.04852	0.00377705
36N	SFTPB	2	24.9373			36N	DRAXIN	31.4278	32.362	31.8949	10.2857	0.000801126	11.4979	0.000345759	13.4521	8.92281e-05
36N	MET	1	23.2225			36N	RAB27A	23.9192	23.7884	23.8538	2.2446	0.211013	3.45686	0.0910713	5.41105	0.0235023
36N	MET	2	23.0493			36N	C8orf44 SGK3	30.7818	30.2435	30.5126	8.90339	0.00208839	10.1157	0.000901331	12.0699	0.000232602
36N	GAPDH	1	21.6484			36N	HTR7-2	31.4049	32.4414	31.9232	10.3139	0.000785588	11.5262	0.000339053	13.4804	8.74975e-05
36N	GAPDH	2	21.57			36N	GABBR2	26.9632	26.5171	26.7402	5.13094	0.0285387	6.3432	0.012317	8.29739	0.0031786
36N	RFX8	1	31.3342			36N	DPP4-2	24.2343	24.0876	24.1609	2.55172	0.170552	3.76398	0.0736087	5.71817	0.0189958
36N	RFX8	2	31.1429			36N	BHLHE40	24.3987	24.2811	24.3399	2.73067	0.150656	3.94294	0.0650216	5.89713	0.0167798
36N	SHC3	1	28.3107			36N	ATP10A	27.99	28.1495	28.0698	6.46053	0.011355	7.67279	0.00490072	9.62698	0.0012647
36N	SHC3	2	28.354			36N	COL26A1-2	32.3431	31.5333	31.9382	10.329	0.000777441	11.5412	0.000335536	13.4954	8.65901e-05
36N	CDH13	1	26.5665			36N	FAM178B	30.5178	29.986	30.2519	8.64263	0.00250213	9.85489	0.0010799	11.8091	0.000278683
36N	CDH13	2	26.4161			36N	GRM5-2	35.3119	35.7208	35.5163	13.9071	6.50948e-05	15.1194	2.80943e-05	17.0736	7.25015e-06
36N	DRAXIN	1	31.4278			36N	LIPH	26.2588	26.4927	26.3758	4.76654	0.0367392	5.9788	0.0158563	7.933	0.00409195
36N	DRAXIN	2	32.362			36N	NRCAM	25.4655	25.2648	25.3652	3.75595	0.0740193	4.96822	0.0319461	6.92241	0.00824415
36N	RAB27A	1	23.9192			36N	NELL2	23.4145	23.5783	23.4964	1.88714	0.270342	3.09941	0.116677	5.0536	0.0301103
36N	RAB27A	2	23.7884			36N	RIN1	29.1762	28.8843	29.0302	7.42099	0.00583526	8.63325	0.00251844	10.5874	0.000649922
36N	C8orf44 SGK3	1	30.7818			36N	LRP4	25.1081	24.9996	25.0538	3.44461	0.0918477	4.65688	0.0396406	6.61107	0.0102298
36N	C8orf44 SGK3	2	30.2435			36N	VDR	28.2269	28.2959	28.2614	6.65216	0.0099426	7.86443	0.00429113	9.81862	0.00110739
36N	HTR7-2	1	31.4049			36N	TPO	20.2929	20.4162	20.3546	-1.25467	2.38612	-0.0424013	1.02983	1.91179	0.265762
36N	HTR7-2	2	32.4414			36N	TP63	27.2335	27.2742	27.2539	5.64463	0.0199893	6.85689	0.0086272	8.81109	0.00222638
36N	GABBR2	1	26.9632			36N	TNIK	26.0591	25.9857	26.0224	4.41315	0.0469365	5.62541	0.0202573	7.57961	0.00522771
36N	GABBR2	2	26.5171			36N	KRT19	23.939	23.6965	23.8178	2.20852	0.216356	3.42078	0.0933773	5.37498	0.0240974
36N	DPP4-2	1	24.2343			36N	GAP43	33.0152	31.2623	32.1388	10.5295	0.000676549	11.7418	0.000291992	13.696	7.5353e-05
36N	DPP4-2	2	24.0876			36N	MATN2	22.8979	22.6521	22.775	1.16576	0.445731	2.37802	0.192373	4.33222	0.0496447
36N	BHLHE40	1	24.3987			36N	E2F1	29.0972	29.3362	29.2167	7.6075	0.00512759	8.81977	0.00221302	10.774	0.000571102
36N	BHLHE40	2	24.2811			36N	CDH16	25.0417	25.0001	25.0209	3.41167	0.0939694	4.62393	0.0405563	6.57812	0.0104662
36N	ATP10A	1	27.99			36N	ALK	32.1858	31.9291	32.0574	10.4482	0.00071577	11.6605	0.00030892	13.6147	7.97213e-05
36N	ATP10A	2	28.1495			36N	ADRA1B-2	29.8401	29.4228	29.6315	8.02223	0.00384652	9.2345	0.00166012	11.1887	0.000428419
36N	COL26A1-2	1	32.3431			36N	ABTB2-2	28.8825	28.6685	28.7755	7.16628	0.00696203	8.37854	0.00300475	10.3327	0.000775419
36N	COL26A1-2	2	31.5333			36N	CHST2-2	25.4288	25.4284	25.4286	3.81936	0.0708368	5.03162	0.0305725	6.98582	0.00788968
36N	FAM178B	1	30.5178			36N	NPC2	20.2058	20.1278	20.1668	-1.44239	2.7177	-0.230124	1.17294	1.72407	0.302693
36N	FAM178B	2	29.986			36N	RPP15-3	27.0194	27.0935	27.0565	5.44723	0.0229202	6.6595	0.00989216	8.61369	0.00255282
36N	GRM5-2	1	35.3119			36N	RUNX1	25.6198	25.8965	25.7581	4.14889	0.0563714	5.36116	0.0243294	7.31535	0.00627856
36N	GRM5-2	2	35.7208			36N	SLC1A5	27.3689	27.6263	27.4976	5.8884	0.0168817	7.10066	0.00728597	9.05486	0.00188025
36N	LIPH	1	26.2588			36N	ITGA2	26.8	26.9543	26.8772	5.26792	0.0259537	6.48018	0.0112014	8.43438	0.00289068
36N	LIPH	2	26.4927			36N	SHC4	31.7962	32.0589	31.9275	10.3183	0.000783212	11.5306	0.000338027	13.4848	8.72329e-05
36N	NRCAM	1	25.4655			36N	STAC	31.2303	31.361	31.2956	9.68637	0.0012137	10.8986	0.000523823	12.8528	0.00013518
36N	NRCAM	2	25.2648			36N	SPOCD1-2	33.7107	33.2283	33.4695	11.8603	0.000268972	13.0725	0.000116086	15.0267	2.99576e-05
36N	NELL2	1	23.4145			36N	TFCP2L1	23.8862	23.9689	23.9275	2.31831	0.200502	3.53058	0.0865348	5.48477	0.0223316
36N	NELL2	2	23.5783			36N	SLC25A21	29.6495	29.8028	29.7261	8.1169	0.00360221	9.32916	0.00155468	11.2834	0.000401209
36N	RIN1	1	29.1762			36N	TNC	28.5747	28.3446	28.4597	6.85042	0.00866601	8.06268	0.00374017	10.0169	0.000965206
36N	RIN1	2	28.8843			36N	TIAM1-2	26.9351	27.1366	27.0359	5.42662	0.0232501	6.63889	0.0100345	8.59308	0.00258955
36N	LRP4	1	25.1081			36N	GALNT7	24.3809	24.0837	24.2323	2.62307	0.162322	3.83534	0.0700565	5.78953	0.0180791
36N	LRP4	2	24.9996			36N	DUSP6	28.0076	28.0045	28.006	6.39681	0.0118678	7.60907	0.00512202	9.56327	0.00132181
36N	VDR	1	28.2269			36N	GALNTL6-2	34.8217	Undetermined	34.8217	13.2125	0.000105355	14.4247	4.54702e-05	16.3789	1.17343e-05
36N	VDR	2	28.2959			36N	KIAA1549L-2	36.0334	34.2932	35.1633	13.554	8.31444e-05	14.7663	3.58843e-05	16.7205	9.26048e-06
36N	TPO	1	20.2929			36N	GAPDH	21.6484	21.57	21.6092
36N	TPO	2	20.4162			36N	OAZ1	20.4418	20.3521	20.397
36N	TP63	1	27.2335			36N	β-actin	18.4674	18.4182	18.4428
36N	TP63	2	27.2742			36T	RUNX2	26.9445	26.5085	26.7265	5.54494	0.0214194	6.33959	0.0123479	7.72681	0.00472062
36N	TNIK	1	26.0591			36T	MCF2L2-2	32.4139	31.2028	31.8083	10.6267	0.00063247	11.4214	0.000364609	12.8086	0.00013939
36N	TNIK	2	25.9857			36T	NRP2	24.3446	24.3173	24.331	3.14939	0.112704	3.94403	0.0649722	5.33126	0.0248389
36N	KRT19	1	23.939			36T	RASD2-2	25.2014	24.5942	24.8978	3.71622	0.0760862	4.51087	0.0438625	5.89809	0.0167686
36N	KRT19	2	23.6965			36T	SFTPB	24.2569	24.1089	24.1829	3.00133	0.124885	3.79597	0.0719942	5.1832	0.0275234
36N	GAP43	1	33.0152			36T	MET	21.6838	21.8286	21.7562	0.574572	0.671486	1.36922	0.387101	2.75644	0.147989
36N	GAP43	2	31.2623			36T	RFX8	29.4286	29.4463	29.4375	8.25588	0.00327139	9.05053	0.0018859	10.4378	0.00072098
36N	MATN2	1	22.8979			36T	SHC3	27.4145	26.9754	27.195	6.01337	0.0154809	6.80802	0.00892446	8.19524	0.00341182
36N	MATN2	2	22.6521			36T	CDH13	25.7217	25.4186	25.5701	4.38855	0.0477437	5.1832	0.0275234	6.57042	0.0105222
36N	E2F1	1	29.0972			36T	DRAXIN	29.9132	29.8678	29.8905	8.70889	0.00238982	9.50353	0.00137769	10.8908	0.000526691
36N	E2F1	2	29.3362			36T	RAB27A	22.5382	22.1548	22.3465	1.1649	0.445994	1.95955	0.257108	3.34678	0.0982925
36N	CDH16	1	25.0417			36T	C8orf44 SGK3	31.159	29.7246	30.4418	9.26021	0.0016308	10.0549	0.000940129	11.4421	0.000359411
36N	CDH16	2	25.0001			36T	HTR7-2	30.9774	32.2521	31.6147	10.4331	0.000723299	11.2278	0.00041697	12.615	0.000159408
36N	ALK	1	32.1858			36T	GABBR2	24.5273	24.3946	24.461	3.27936	0.102994	4.07401	0.0593745	5.46124	0.0226989
36N	ALK	2	31.9291			36T	DPP4-2	22.2576	22.0633	22.1605	0.978873	0.507376	1.77352	0.292494	3.16074	0.11182
36N	ADRA1B-2	1	29.8401			36T	BHLHE40	23.638	23.4416	23.5398	2.35819	0.195035	3.15284	0.112435	4.54006	0.0429838
36N	ADRA1B-2	2	29.4228			36T	ATP10A	26.7507	26.779	26.7649	5.58329	0.0208576	6.37793	0.012024	7.76516	0.00459679
36N	ABTB2-2	1	28.8825			36T	COL26A1-2	30.4358	30.62	30.5279	9.3463	0.00153633	10.1409	0.000885668	11.5282	0.000338591
36N	ABTB2-2	2	28.6685			36T	FAM178B	29.032	29.0675	29.0498	7.86817	0.00428001	8.66282	0.00246735	10.05	0.000943269
36N	CHST2-2	1	25.4288			36T	GRM5-2	37.8103	36.2153	37.0128	15.8312	1.71523e-05	16.6259	9.888e-06	18.0131	3.78018e-06
36N	CHST2-2	2	25.4284			36T	LIPH	23.9907	23.932	23.9614	2.77975	0.145617	3.5744	0.0839456	4.96163	0.0320924
36N	NPC2	1	20.2058			36T	NRCAM	24.1355	24.1528	24.1441	2.96252	0.12829	3.75717	0.073957	5.14439	0.0282737
36N	NPC2	2	20.1278			36T	NELL2	21.5013	21.1331	21.3172	0.135599	0.910292	0.930247	0.524768	2.31747	0.200619
36N	RPP15-3	1	27.0194			36T	RIN1	28.2775	27.9081	28.0928	6.91119	0.00830852	7.70584	0.00478973	9.09306	0.00183111
36N	RPP15-3	2	27.0935			36T	LRP4	22.8965	22.7888	22.8427	1.66106	0.316207	2.4557	0.182288	3.84293	0.0696889
36N	RUNX1	1	25.6198			36T	VDR	27.2217	27.0889	27.1553	5.97374	0.015912	6.76839	0.00917299	8.15562	0.00350683
36N	RUNX1	2	25.8965			36T	TPO	21.2867	21.4432	21.365	0.18337	0.880644	0.978018	0.507677	2.36524	0.194085
36N	SLC1A5	1	27.3689			36T	TP63	26.0255	25.7836	25.9045	4.72295	0.037866	5.5176	0.0218291	6.90482	0.00834528
36N	SLC1A5	2	27.6263			36T	TNIK	24.3955	24.4569	24.4262	3.24463	0.105504	4.03928	0.0608212	5.42651	0.0232519
36N	ITGA2	1	26.8			36T	KRT19	23.584	23.4433	23.5136	2.33205	0.198601	3.1267	0.11449	4.51392	0.0437697
36N	ITGA2	2	26.9543			36T	GAP43	32.0827	31.766	31.9244	10.7428	0.000583585	11.5374	0.000336427	12.9246	0.000128616
36N	SHC4	1	31.7962			36T	MATN2	23.9294	23.4208	23.6751	2.49353	0.177571	3.28818	0.102367	4.6754	0.0391349
36N	SHC4	2	32.0589			36T	E2F1	28.4476	28.5007	28.4742	7.29257	0.0063785	8.08722	0.0036771	9.47444	0.00140576
36N	STAC	1	31.2303			36T	CDH16	26.9956	27.0331	27.0143	5.83272	0.0175459	6.62737	0.0101149	8.0146	0.00386693
36N	STAC	2	31.361			36T	ALK	29.9636	29.8458	29.9047	8.7231	0.00236639	9.51775	0.00136418	10.905	0.000521527
36N	SPOCD1-2	1	33.7107			36T	ADRA1B-2	27.9698	28.2029	28.0863	6.90473	0.0083458	7.69938	0.00481122	9.08661	0.00183933
36N	SPOCD1-2	2	33.2283			36T	ABTB2-2	25.9222	26.8859	26.4041	5.22248	0.0267841	6.01713	0.0154406	7.40435	0.00590294
36N	TFCP2L1	1	23.8862			36T	CHST2-2	24.1785	23.9886	24.0836	2.90199	0.133787	3.69663	0.0771263	5.08386	0.0294854
36N	TFCP2L1	2	23.9689			36T	NPC2	18.7627	18.4558	18.6093	-2.57234	5.94771	-1.77769	3.42876	-0.390464	1.31081
36N	SLC25A21	1	29.6495			36T	RPP15-3	24.6887	24.5015	24.5951	3.41349	0.0938509	4.20813	0.0541035	5.59536	0.0206838
36N	SLC25A21	2	29.8028			36T	RUNX1	24.456	24.5518	24.5039	3.32232	0.099973	4.11697	0.0576328	5.50419	0.022033
36N	TNC	1	28.5747			36T	SLC1A5	27.6682	26.5529	27.1105	5.92894	0.0164139	6.72359	0.00946234	8.11081	0.00361745
36N	TNC	2	28.3446			36T	ITGA2	26.411	26.2468	26.3289	5.14726	0.0282176	5.94191	0.016267	7.32913	0.00621886
36N	TIAM1-2	1	26.9351			36T	SHC4	31.8602	31.3336	31.5969	10.4153	0.000732272	11.21	0.000422143	12.5972	0.000161385
36N	TIAM1-2	2	27.1366			36T	STAC	30.9751	31.3447	31.1599	9.97833	0.00099134	10.773	0.000571491	12.1602	0.000218481
36N	GALNT7	1	24.3809			36T	SPOCD1-2	33.4392	Undetermined	33.4392	12.2576	0.000204224	13.0522	0.000117732	14.4394	4.50088e-05
36N	GALNT7	2	24.0837			36T	TFCP2L1	25.1368	25.6232	25.38	4.19841	0.0544696	4.99305	0.0314008	6.38028	0.0120045
36N	DUSP6	1	28.0076			36T	SLC25A21	30.2439	30.2526	30.2483	9.06667	0.00186492	9.86132	0.0010751	11.2485	0.00041101
36N	DUSP6	2	28.0045			36T	TNC	26.894	27.4678	27.1809	5.99931	0.0156324	6.79396	0.00901184	8.18119	0.00344523
36N	GALNTL6-2	1	34.8217			36T	TIAM1-2	25.6867	25.8233	25.755	4.5734	0.042002	5.36805	0.0242135	6.75527	0.0092568
36N	GALNTL6-2	2	Undetermined			36T	GALNT7	22.6623	22.741	22.7017	1.52006	0.348671	2.31471	0.201003	3.70193	0.0768435
36N	KIAA1549L-2	1	36.0334			36T	DUSP6	27.1781	26.8416	27.0099	5.82829	0.0175999	6.62294	0.0101461	8.01016	0.00387884
36N	KIAA1549L-2	2	34.2932			36T	GALNTL6-2	32.8741	30.6214	31.7477	10.5661	0.00065959	11.3608	0.000380243	12.748	0.000145367
36N	OAZ1	1	20.4418			36T	KIAA1549L-2	34.5528	33.7388	34.1458	12.9642	0.00012514	13.7588	7.21409e-05	15.146	2.75795e-05
36N	OAZ1	2	20.3521			36T	GAPDH	21.2561	21.1071	21.1816
36N	β-actin	1	18.4674			36T	OAZ1	20.3596	20.4143	20.3869
36N	β-actin	2	18.4182			36T	β-actin	19.0618	18.9377	18.9997
36T	RUNX2	1	26.9445			4T	RUNX2	25.4793	25.7116	25.5954	4.03871	0.0608453	4.30045	0.05075	6.62951	0.0101
36T	RUNX2	2	26.5085			4T	MCF2L2-2	31.079	30.6365	30.8577	9.30099	0.00158534	9.56273	0.00132231	11.8918	0.000263157
36T	MCF2L2-2	1	32.4139			4T	NRP2	23.6865	23.5043	23.5954	2.03871	0.243382	2.30045	0.203	4.62951	0.0403999
36T	MCF2L2-2	2	31.2028			4T	RASD2-2	24.722	24.9415	24.8318	3.27502	0.103305	3.53676	0.0861649	5.86582	0.017148
36T	NRP2	1	24.3446			4T	SFTPB	21.9839	22.023	22.0034	0.4467	0.733719	0.708438	0.611982	3.0375	0.121793
36T	NRP2	2	24.3173			4T	MET	22.3417	22.1993	22.2705	0.713745	0.609735	0.975483	0.50857	3.30454	0.101212
36T	RASD2-2	1	25.2014			4T	RFX8	30.0074	29.6548	29.8311	8.27436	0.00322975	8.5361	0.00269388	10.8652	0.000536118
36T	RASD2-2	2	24.5942			4T	SHC3	27.3118	27.2648	27.2883	5.73152	0.0188209	5.99326	0.0156982	8.32232	0.00312416
36T	SFTPB	1	24.2569			4T	CDH13	25.3523	25.4984	25.4253	3.86861	0.0684593	4.13035	0.0571007	6.45941	0.0113638
36T	SFTPB	2	24.1089			4T	DRAXIN	29.0256	29.0883	29.057	7.50023	0.0055234	7.76197	0.00460697	10.091	0.000916851
36T	MET	1	21.6838			4T	RAB27A	23.6185	23.1593	23.3889	1.83217	0.280841	2.09391	0.234245	4.42297	0.046618
36T	MET	2	21.8286			4T	C8orf44 SGK3	29.9776	30.0178	29.9977	8.44096	0.00287751	8.7027	0.00240009	11.0318	0.00047765
36T	GAPDH	1	21.2561			4T	HTR7-2	31.0026	30.9786	30.9906	9.43385	0.00144586	9.69559	0.00120597	12.0247	0.000240005
36T	GAPDH	2	21.1071			4T	GABBR2	25.651	25.7385	25.6947	4.13798	0.0567993	4.39972	0.0473753	6.72878	0.00942834
36T	RFX8	1	29.4286			4T	DPP4-2	22.9512	22.9086	22.9299	1.37314	0.38605	1.63488	0.321997	3.96394	0.0640819
36T	RFX8	2	29.4463			4T	BHLHE40	22.0242	21.9603	21.9922	0.435505	0.739435	0.697243	0.61675	3.0263	0.122742
36T	SHC3	1	27.4145			4T	ATP10A	26.8118	27.5732	27.1925	5.63578	0.0201123	5.89751	0.0167753	8.22657	0.00333853
36T	SHC3	2	26.9754			4T	COL26A1-2	30.5844	30.8568	30.7206	9.1639	0.00174338	9.42563	0.00145412	11.7547	0.000289391
36T	CDH13	1	25.7217			4T	FAM178B	27.4126	27.2026	27.3076	5.75091	0.0185697	6.01264	0.0154887	8.3417	0.00308246
36T	CDH13	2	25.4186			4T	GRM5-2	34.1724	33.9277	34.0501	12.4933	0.000173434	12.7551	0.000144658	15.0841	2.8789e-05
36T	DRAXIN	1	29.9132			4T	LIPH	24.1393	23.964	24.0516	2.49491	0.177402	2.75664	0.147968	5.0857	0.0294476
36T	DRAXIN	2	29.8678			4T	NRCAM	23.6914	23.6032	23.6473	2.09056	0.23479	2.3523	0.195834	4.68136	0.0389737
36T	RAB27A	1	22.5382			4T	NELL2	23.4124	23.3424	23.3774	1.82068	0.283088	2.08242	0.236118	4.41148	0.0469908
36T	RAB27A	2	22.1548			4T	RIN1	26.9577	27.1802	27.069	5.51226	0.0219101	5.774	0.0182749	8.10306	0.00363695
36T	C8orf44 SGK3	1	31.159			4T	LRP4	22.5834	22.5662	22.5748	1.01808	0.493772	1.27982	0.411846	3.60888	0.0819631
36T	C8orf44 SGK3	2	29.7246			4T	VDR	27.4063	27.3594	27.3828	5.8261	0.0176267	6.08784	0.0147021	8.41689	0.00292592
36T	HTR7-2	1	30.9774			4T	TPO	26.6403	26.6201	26.6302	5.0735	0.0296977	5.33524	0.0247703	7.6643	0.00492964
36T	HTR7-2	2	32.2521			4T	TP63	27.7353	28.1602	27.9478	6.39103	0.0119154	6.65276	0.00993845	8.98182	0.00197789
36T	GABBR2	1	24.5273			4T	TNIK	24.3697	24.2893	24.3295	2.77278	0.146322	3.03452	0.122045	5.36357	0.0242886
36T	GABBR2	2	24.3946			4T	KRT19	22.6689	22.6814	22.6751	1.11841	0.460602	1.38015	0.38418	3.70921	0.0764571
36T	DPP4-2	1	22.2576			4T	GAP43	30.7982	31.1359	30.9671	9.41034	0.00146962	9.67208	0.00122579	12.0011	0.000243948
36T	DPP4-2	2	22.0633			4T	MATN2	25.0342	25.115	25.0746	3.51787	0.0873	3.77961	0.0728155	6.10867	0.0144913
36T	BHLHE40	1	23.638			4T	E2F1	29.3485	29.3932	29.3708	7.81411	0.00444345	8.07584	0.0037062	10.4049	0.000737585
36T	BHLHE40	2	23.4416			4T	CDH16	29.5753	29.943	29.7592	8.20244	0.00339484	8.46418	0.00283158	10.7932	0.000563523
36T	ATP10A	1	26.7507			4T	ALK	28.6741	28.3368	28.5054	6.94869	0.00809534	7.21043	0.00675218	9.53949	0.00134378
36T	ATP10A	2	26.779			4T	ADRA1B-2	28.3308	28.5198	28.4253	6.86857	0.00855763	7.13031	0.00713777	9.45937	0.00142051
36T	COL26A1-2	1	30.4358			4T	ABTB2-2	25.9244	26.1733	26.0488	4.4921	0.0444367	4.75384	0.0370639	7.0829	0.00737622
36T	COL26A1-2	2	30.62			4T	CHST2-2	24.939	25.0005	24.9697	3.413	0.0938823	3.67474	0.0783056	6.0038	0.0155839
36T	FAM178B	1	29.032			4T	NPC2	18.4861	18.4855	18.4858	-3.07095	8.40328	-2.80921	7.00903	-0.480155	1.39489
36T	FAM178B	2	29.0675			4T	RPP15-3	24.858	24.8594	24.8587	3.30199	0.101391	3.56373	0.0845688	5.89279	0.0168304
36T	GRM5-2	1	37.8103			4T	RUNX1	23.4073	23.5112	23.4592	1.90248	0.267484	2.16422	0.223103	4.49327	0.0444007
36T	GRM5-2	2	36.2153			4T	SLC1A5	26.3719	26.1544	26.2632	4.70643	0.0383022	4.96817	0.0319472	7.29723	0.00635793
36T	LIPH	1	23.9907			4T	ITGA2	26.2393	26.2727	26.256	4.69924	0.0384934	4.96098	0.0321067	7.29004	0.00638968
36T	LIPH	2	23.932			4T	SHC4	30.1456	31.3619	30.7538	9.19704	0.00170379	9.45878	0.0014211	11.7878	0.000282818
36T	NRCAM	1	24.1355			4T	STAC	28.7979	28.6092	28.7035	7.1468	0.00705668	7.40853	0.00588585	9.73759	0.00117137
36T	NRCAM	2	24.1528			4T	SPOCD1-2	31.0968	31.1428	31.1198	9.56306	0.001322	9.8248	0.00110266	12.1539	0.000219444
36T	NELL2	1	21.5013			4T	TFCP2L1	26.7966	27.1021	26.9493	5.3926	0.0238048	5.65434	0.0198552	7.9834	0.00395145
36T	NELL2	2	21.1331			4T	SLC25A21	30.2064	30.0535	30.13	8.57325	0.0026254	8.83498	0.0021898	11.164	0.000435801
36T	RIN1	1	28.2775			4T	TNC	28.2898	27.9569	28.1233	6.56657	0.0105503	6.82831	0.00879981	9.15737	0.00175128
36T	RIN1	2	27.9081			4T	TIAM1-2	24.9438	25.1165	25.0301	3.47338	0.0900344	3.73512	0.0750961	6.06418	0.0149452
36T	LRP4	1	22.8965			4T	GALNT7	22.8151	22.809	22.812	1.25528	0.418911	1.51702	0.349407	3.84608	0.0695367
36T	LRP4	2	22.7888			4T	DUSP6	28.9882	27.3195	28.1538	6.59711	0.0103293	6.85885	0.00861552	9.18791	0.00171461
36T	VDR	1	27.2217			4T	GALNTL6-2	33.318	38.6553	35.9866	14.4299	4.5307e-05	14.6916	3.77897e-05	17.0207	7.52068e-06
36T	VDR	2	27.0889			4T	KIAA1549L-2	31.1876	30.8792	31.0334	9.47664	0.00140361	9.73838	0.00117073	12.0674	0.000232991
36T	TPO	1	21.2867			4T	GAPDH	21.5496	21.5638	21.5567
36T	TPO	2	21.4432			4T	OAZ1	21.3903	21.1997	21.295
36T	TP63	1	26.0255			4T	β-actin	18.9965	18.9353	18.9659
36T	TP63	2	25.7836
36T	TNIK	1	24.3955
36T	TNIK	2	24.4569
36T	KRT19	1	23.584
36T	KRT19	2	23.4433
36T	GAP43	1	32.0827
36T	GAP43	2	31.766
36T	MATN2	1	23.9294
36T	MATN2	2	23.4208
36T	E2F1	1	28.4476
36T	E2F1	2	28.5007
36T	CDH16	1	26.9956
36T	CDH16	2	27.0331
36T	ALK	1	29.9636
36T	ALK	2	29.8458
36T	ADRA1B-2	1	27.9698
36T	ADRA1B-2	2	28.2029
36T	ABTB2-2	1	25.9222
36T	ABTB2-2	2	26.8859
36T	CHST2-2	1	24.1785
36T	CHST2-2	2	23.9886
36T	NPC2	1	18.7627
36T	NPC2	2	18.4558
36T	RPP15-3	1	24.6887
36T	RPP15-3	2	24.5015
36T	RUNX1	1	24.456
36T	RUNX1	2	24.5518
36T	SLC1A5	1	27.6682
36T	SLC1A5	2	26.5529
36T	ITGA2	1	26.411
36T	ITGA2	2	26.2468
36T	SHC4	1	31.8602
36T	SHC4	2	31.3336
36T	STAC	1	30.9751
36T	STAC	2	31.3447
36T	SPOCD1-2	1	33.4392
36T	SPOCD1-2	2	Undetermined
36T	TFCP2L1	1	25.1368
36T	TFCP2L1	2	25.6232
36T	SLC25A21	1	30.2439
36T	SLC25A21	2	30.2526
36T	TNC	1	26.894
36T	TNC	2	27.4678
36T	TIAM1-2	1	25.6867
36T	TIAM1-2	2	25.8233
36T	GALNT7	1	22.6623
36T	GALNT7	2	22.741
36T	DUSP6	1	27.1781
36T	DUSP6	2	26.8416
36T	GALNTL6-2	1	32.8741
36T	GALNTL6-2	2	30.6214
36T	KIAA1549L-2	1	34.5528
36T	KIAA1549L-2	2	33.7388
36T	OAZ1	1	20.3596
36T	OAZ1	2	20.4143
36T	β-actin	1	19.0618
36T	β-actin	2	18.9377
4T	RUNX2	1	25.4793
4T	RUNX2	2	25.7116
4T	MCF2L2-2	1	31.079
4T	MCF2L2-2	2	30.6365
4T	NRP2	1	23.6865
4T	NRP2	2	23.5043
4T	RASD2-2	1	24.722
4T	RASD2-2	2	24.9415
4T	SFTPB	1	21.9839
4T	SFTPB	2	22.023
4T	MET	1	22.3417
4T	MET	2	22.1993
4T	GAPDH	1	21.5496
4T	GAPDH	2	21.5638
4T	RFX8	1	30.0074
4T	RFX8	2	29.6548
4T	SHC3	1	27.3118
4T	SHC3	2	27.2648
4T	CDH13	1	25.3523
4T	CDH13	2	25.4984
4T	DRAXIN	1	29.0256
4T	DRAXIN	2	29.0883
4T	RAB27A	1	23.6185
4T	RAB27A	2	23.1593
4T	C8orf44 SGK3	1	29.9776
4T	C8orf44 SGK3	2	30.0178
4T	HTR7-2	1	31.0026
4T	HTR7-2	2	30.9786
4T	GABBR2	1	25.651
4T	GABBR2	2	25.7385
4T	DPP4-2	1	22.9512
4T	DPP4-2	2	22.9086
4T	BHLHE40	1	22.0242
4T	BHLHE40	2	21.9603
4T	ATP10A	1	26.8118
4T	ATP10A	2	27.5732
4T	COL26A1-2	1	30.5844
4T	COL26A1-2	2	30.8568
4T	FAM178B	1	27.4126
4T	FAM178B	2	27.2026
4T	GRM5-2	1	34.1724
4T	GRM5-2	2	33.9277
4T	LIPH	1	24.1393
4T	LIPH	2	23.964
4T	NRCAM	1	23.6914
4T	NRCAM	2	23.6032
4T	NELL2	1	23.4124
4T	NELL2	2	23.3424
4T	RIN1	1	26.9577
4T	RIN1	2	27.1802
4T	LRP4	1	22.5834
4T	LRP4	2	22.5662
4T	VDR	1	27.4063
4T	VDR	2	27.3594
4T	TPO	1	26.6403
4T	TPO	2	26.6201
4T	TP63	1	27.7353
4T	TP63	2	28.1602
4T	TNIK	1	24.3697
4T	TNIK	2	24.2893
4T	KRT19	1	22.6689
4T	KRT19	2	22.6814
4T	GAP43	1	30.7982
4T	GAP43	2	31.1359
4T	MATN2	1	25.0342
4T	MATN2	2	25.115
4T	E2F1	1	29.3485
4T	E2F1	2	29.3932
4T	CDH16	1	29.5753
4T	CDH16	2	29.943
4T	ALK	1	28.6741
4T	ALK	2	28.3368
4T	ADRA1B-2	1	28.3308
4T	ADRA1B-2	2	28.5198
4T	ABTB2-2	1	25.9244
4T	ABTB2-2	2	26.1733
4T	CHST2-2	1	24.939
4T	CHST2-2	2	25.0005
4T	NPC2	1	18.4861
4T	NPC2	2	18.4855
4T	RPP15-3	1	24.858
4T	RPP15-3	2	24.8594
4T	RUNX1	1	23.4073
4T	RUNX1	2	23.5112
4T	SLC1A5	1	26.3719
4T	SLC1A5	2	26.1544
4T	ITGA2	1	26.2393
4T	ITGA2	2	26.2727
4T	SHC4	1	30.1456
4T	SHC4	2	31.3619
4T	STAC	1	28.7979
4T	STAC	2	28.6092
4T	SPOCD1-2	1	31.0968
4T	SPOCD1-2	2	31.1428
4T	TFCP2L1	1	26.7966
4T	TFCP2L1	2	27.1021
4T	SLC25A21	1	30.2064
4T	SLC25A21	2	30.0535
4T	TNC	1	28.2898
4T	TNC	2	27.9569
4T	TIAM1-2	1	24.9438
4T	TIAM1-2	2	25.1165
4T	GALNT7	1	22.8151
4T	GALNT7	2	22.809
4T	DUSP6	1	28.9882
4T	DUSP6	2	27.3195
4T	GALNTL6-2	1	33.318
4T	GALNTL6-2	2	38.6553
4T	KIAA1549L-2	1	31.1876
4T	KIAA1549L-2	2	30.8792
4T	OAZ1	1	21.3903
4T	OAZ1	2	21.1997
4T	β-actin	1	18.9965
4T	β-actin	2	18.9353

## Sheet: P5
Raw data (P5)						Data processing (P5)
Target	Sample	Task	CT			Sample	Target	CT1	CT2	Mean CT	△Ct	Relative expression (relative to GAPDH)	△Ct	Relative expression (relative to OAZ1)	△Ct	Relative expression (relative to β-actin)
RUNX2	34N	1	28.8048			34N	RUNX2	28.8048	28.716	28.7604	5.55155	0.0213214	6.58718	0.0104007	9.5111	0.00137048
RUNX2	34N	2	28.716			34N	MCF2L2-2	32.9471	33.6329	33.29	10.0811	0.000923165	11.1167	0.000450324	14.0407	5.93384e-05
MCF2L2-2	34N	1	32.9471			34N	NRP2	28.5413	28.2432	28.3923	5.18339	0.0275197	6.21902	0.0134242	9.14294	0.00176889
MCF2L2-2	34N	2	33.6329			34N	RASD2-2	30.0342	29.9082	29.9712	6.76238	0.00921131	7.798	0.00449332	10.7219	0.000592077
NRP2	34N	1	28.5413			34N	SFTPB	24.5849	24.6324	24.6087	1.3998	0.378982	2.43542	0.184869	5.35935	0.0243599
NRP2	34N	2	28.2432			34N	MET	26.6501	26.6766	26.6634	3.4545	0.0912202	4.49013	0.0444976	7.41405	0.00586338
RASD2-2	34N	1	30.0342			34N	RFX8	32.7865	32.4432	32.6149	9.40599	0.00147406	10.4416	0.000719053	13.3655	9.47484e-05
RASD2-2	34N	2	29.9082			34N	SHC3	29.891	29.7445	29.8178	6.60891	0.0102452	7.64453	0.00499765	10.5685	0.000658533
SFTPB	34N	1	24.5849			34N	CDH13	28.2226	28.6007	28.4116	5.20276	0.0271528	6.23838	0.0132452	9.16231	0.0017453
SFTPB	34N	2	24.6324			34N	DRAXIN	35.9451	33.9164	34.9307	11.7219	0.000296054	12.7575	0.000144416	15.6814	1.90295e-05
MET	34N	1	26.6501			34N	RAB27A	25.9586	26.0266	25.9926	2.78371	0.145217	3.81934	0.0708377	6.74326	0.00933417
MET	34N	2	26.6766			34N	C8orf44 SGK3	32.1795	33.12	32.6497	9.44088	0.00143884	10.4765	0.000701873	13.4004	9.24847e-05
GAPDH	34N	1	23.205			34N	HTR7-2	31.457	33.24	32.3485	9.13966	0.00177291	10.1753	0.000864834	13.0992	0.000113958
GAPDH	34N	2	23.2128			34N	GABBR2	31.1491	30.6145	30.8818	7.67295	0.00490016	8.70858	0.00239032	11.6325	0.000314969
RFX8	34N	1	32.7865			34N	DPP4-2	27.659	27.6418	27.6504	4.44153	0.0460222	5.47715	0.0224498	8.40108	0.00295818
RFX8	34N	2	32.4432			34N	BHLHE40	25.9978	25.8722	25.935	2.72616	0.151128	3.76178	0.0737209	6.68571	0.00971409
SHC3	34N	1	29.891			34N	ATP10A	29.0388	28.9377	28.9883	5.77942	0.0182063	6.81505	0.00888109	9.73897	0.00117025
SHC3	34N	2	29.7445			34N	COL26A1-2	34.1377	35.0572	34.5975	11.3886	0.000372986	12.4242	0.000181944	15.3481	2.39745e-05
CDH13	34N	1	28.2226			34N	FAM178B	32.39	31.7517	32.0709	8.86199	0.00214919	9.89762	0.00104838	12.8215	0.000138144
CDH13	34N	2	28.6007			34N	GRM5-2	34.5245		34.5245	11.3157	0.000392323	12.3513	0.000191377	15.2752	2.52174e-05
DRAXIN	34N	1	35.9451			34N	LIPH	32.2213	33.2263	32.7238	9.51496	0.00136682	10.5506	0.000666739	13.4745	8.78551e-05
DRAXIN	34N	2	33.9164			34N	NRCAM	27.5121	27.3838	27.448	4.2391	0.0529545	5.27473	0.0258314	8.19865	0.00340376
RAB27A	34N	1	25.9586			34N	NELL2	27.0697	27.1428	27.1063	3.89739	0.0671071	4.93302	0.0327351	7.85694	0.00431346
RAB27A	34N	2	26.0266			34N	RIN1	30.2624	30.4089	30.3357	7.12681	0.0071551	8.16244	0.00349029	11.0864	0.00045991
C8orf44 SGK3	34N	1	32.1795			34N	LRP4	30.4962	30.1306	30.3134	7.1045	0.00726661	8.14013	0.00354469	11.0641	0.000467077
C8orf44 SGK3	34N	2	33.12			34N	VDR	29.0041	29.1505	29.0773	5.86848	0.0171164	6.9041	0.00834946	9.82803	0.00110019
HTR7-2	34N	1	31.457			34N	TPO	22.5048	22.5359	22.5203	-0.68855	1.61166	0.347075	0.786176	3.271	0.103593
HTR7-2	34N	2	33.24			34N	TP63	29.3634	30.0617	29.7125	6.50367	0.0110205	7.53929	0.00537585	10.4632	0.000708367
GABBR2	34N	1	31.1491			34N	TNIK	27.4674	27.5399	27.5037	4.29482	0.0509484	5.33045	0.0248528	8.25437	0.00327482
GABBR2	34N	2	30.6145			34N	KRT19	26.4584	26.6532	26.5558	3.34695	0.0982805	4.38258	0.0479417	7.3065	0.00631719
DPP4-2	34N	1	27.659			34N	GAP43	31.1292	31.1039	31.1166	7.9077	0.00416433	8.94332	0.00203138	11.8672	0.000267672
DPP4-2	34N	2	27.6418			34N	MATN2	25.7972	25.9503	25.8737	2.66488	0.157685	3.70051	0.0769194	6.62443	0.0101355
BHLHE40	34N	1	25.9978			34N	E2F1	29.2731	29.0422	29.1577	5.9488	0.0161895	6.98443	0.00789729	9.90835	0.00104061
BHLHE40	34N	2	25.8722			34N	CDH16	29.0859	29.0165	29.0512	5.84232	0.0174295	6.87795	0.00850219	9.80187	0.00112032
ATP10A	34N	1	29.0388			34N	ALK	36.0174	38.4301	37.2238	14.0149	6.04083e-05	15.0505	2.94674e-05	17.9744	3.88288e-06
ATP10A	34N	2	28.9377			34N	ADRA1B-2	33.9471	33.999	33.9731	10.7642	0.000574975	11.7998	0.000280475	14.7238	3.69578e-05
COL26A1-2	34N	1	34.1377			34N	ABTB2-2	29.3789	29.733	29.556	6.34712	0.0122836	7.38275	0.00599199	10.3067	0.000789555
COL26A1-2	34N	2	35.0572			34N	CHST2-2	27.0919	27.2817	27.1868	3.97792	0.0634641	5.01354	0.0309581	7.93747	0.00407929
FAM178B	34N	1	32.39			34N	NPC2	22.0197	22.1422	22.0809	-1.12791	2.18542	-0.092287	1.06606	2.83164	0.140473
FAM178B	34N	2	31.7517			34N	RPP15-3	30.7585	29.274	30.0163	6.80741	0.00892822	7.84304	0.00435522	10.767	0.000573881
GRM5-2	34N	1	34.5245			34N	RUNX1	25.6635	25.784	25.7238	2.51491	0.174959	3.55054	0.0853458	6.47446	0.0112459
GRM5-2	34N	2				34N	SLC1A5	27.6038	27.61	27.6069	4.39802	0.0474312	5.43365	0.0231371	8.35757	0.00304874
LIPH	34N	1	32.2213			34N	ITGA2	28.3481	28.7178	28.533	5.32411	0.0249623	6.35973	0.0121767	9.28366	0.0016045
LIPH	34N	2	33.2263			34N	SHC4	31.552	32.3446	31.9483	8.73947	0.00233968	9.7751	0.00114131	12.699	0.000150388
NRCAM	34N	1	27.5121			34N	STAC	31.8582	32.2296	32.0439	8.83502	0.00218974	9.87065	0.00106817	12.7946	0.00014075
NRCAM	34N	2	27.3838			34N	SPOCD1-2	34.0335	32.9648	33.4992	10.2903	0.000798567	11.3259	0.000389544	14.2498	5.13296e-05
NELL2	34N	1	27.0697			34N	TFCP2L1	26.2188	26.3661	26.2924	3.08357	0.117965	4.11919	0.0575438	7.04312	0.00758246
NELL2	34N	2	27.1428			34N	SLC25A21	31.6909	32.3166	32.0037	8.79489	0.00225152	9.83051	0.0010983	12.7544	0.000144721
RIN1	34N	1	30.2624			34N	TNC	28.8216	28.958	28.8898	5.68093	0.0194926	6.71656	0.00950857	9.64048	0.00125293
RIN1	34N	2	30.4089			34N	TIAM1-2	28.2734	28.6274	28.4504	5.24154	0.0264326	6.27716	0.0128939	9.20109	0.00169901
LRP4	34N	1	30.4962			34N	GALNT7	26.7055	25.7845	26.245	3.03611	0.12191	4.07173	0.0594684	6.99566	0.00783605
LRP4	34N	2	30.1306			34N	DUSP6	31.3193	30.8824	31.1008	7.89198	0.00420996	8.9276	0.00205364	11.8515	0.000270605
VDR	34N	1	29.0041			34N	GALNTL6-2	35.3458	35.6954	35.5206	12.3117	0.000196697	13.3474	9.59495e-05	16.2713	1.26431e-05
VDR	34N	2	29.1505			34N	KIAA1549L-2	36.0017	35.7637	35.8827	12.6738	0.000153038	13.7094	7.46527e-05	16.6334	9.83686e-06
TPO	34N	1	22.5048			34N	GAPDH	23.205	23.2128	23.2089
TPO	34N	2	22.5359			34N	OAZ1	22.1592	22.1872	22.1732
TP63	34N	1	29.3634			34N	β-actin	19.2408	19.2579	19.2493
TP63	34N	2	30.0617			34T	RUNX2	27.1015	27.652	27.3768	6.05486	0.015042	6.41525	0.011717	9.03026	0.00191258
TNIK	34N	1	27.4674			34T	MCF2L2-2	31.6563	31.4786	31.5675	10.2456	0.000823721	10.606	0.000641639	13.221	0.000104735
TNIK	34N	2	27.5399			34T	NRP2	26.2598	26.4902	26.375	5.05308	0.0301211	5.41348	0.0234629	8.02849	0.00382987
KRT19	34N	1	26.4584			34T	RASD2-2	27.4909	27.7769	27.6339	6.31194	0.0125868	6.67234	0.00980453	9.28735	0.0016004
KRT19	34N	2	26.6532			34T	SFTPB	21.2446	21.3707	21.3076	-0.0142655	1.00994	0.346128	0.786692	2.96114	0.128413
GAP43	34N	1	31.1292			34T	MET	22.6823	22.7932	22.7377	1.41584	0.374793	1.77623	0.291945	4.39124	0.0476545
GAP43	34N	2	31.1039			34T	RFX8	30.7133	30.3344	30.5239	9.20194	0.00169801	9.56233	0.00132267	12.1773	0.0002159
MATN2	34N	1	25.7972			34T	SHC3	27.334	28.4101	27.872	6.55013	0.0106712	6.91052	0.00831237	9.52554	0.00135684
MATN2	34N	2	25.9503			34T	CDH13	27.9911	28.1476	28.0693	6.74741	0.00930739	7.1078	0.00725001	9.72281	0.00118343
E2F1	34N	1	29.2731			34T	DRAXIN	31.2161	31.6286	31.4224	10.1005	0.000910872	10.4609	0.000709525	13.0759	0.000115817
E2F1	34N	2	29.0422			34T	RAB27A	23.9609	23.9844	23.9727	2.65078	0.159234	3.01117	0.124036	5.62618	0.0202465
CDH16	34N	1	29.0859			34T	C8orf44 SGK3	31.3558	30.4046	30.8802	9.5583	0.00132637	9.91869	0.00103318	12.5337	0.000168647
CDH16	34N	2	29.0165			34T	HTR7-2	30.036	29.8734	29.9547	8.63281	0.00251922	8.9932	0.00196235	11.6082	0.000320316
ALK	34N	1	36.0174			34T	GABBR2	27.0156	27.0765	27.0461	5.72415	0.0189172	6.08455	0.0147356	8.69956	0.00240531
ALK	34N	2	38.4301			34T	DPP4-2	24.2542	24.137	24.1956	2.87371	0.136436	3.2341	0.106277	5.84911	0.0173477
ADRA1B-2	34N	1	33.9471			34T	BHLHE40	23.5037	23.3479	23.4258	2.10389	0.232631	2.46428	0.181208	5.07929	0.0295788
ADRA1B-2	34N	2	33.999			34T	ATP10A	27.8514	28.1133	27.9824	6.66048	0.00988544	7.02087	0.00770028	9.63589	0.00125692
ABTB2-2	34N	1	29.3789			34T	COL26A1-2	32.2664	32.0242	32.1453	10.8234	0.000551865	11.1838	0.000429876	13.7988	7.01692e-05
ABTB2-2	34N	2	29.733			34T	FAM178B	29.255	29.4755	29.3652	8.0433	0.00379074	8.4037	0.00295281	11.0187	0.00048199
CHST2-2	34N	1	27.0919			34T	GRM5-2	36.7516	35.9466	36.3491	15.0272	2.99475e-05	15.3876	2.33276e-05	18.0026	3.80779e-06
CHST2-2	34N	2	27.2817			34T	LIPH	25.9643	26.0507	26.0075	4.6856	0.0388591	5.046	0.0302693	7.66101	0.00494089
NPC2	34N	1	22.0197			34T	NRCAM	25.0009	25.3109	25.1559	3.83401	0.0701211	4.1944	0.054621	6.80941	0.00891584
NPC2	34N	2	22.1422			34T	NELL2	24.6381	24.6049	24.6215	3.29958	0.101561	3.65998	0.0791111	6.27499	0.0129134
RPP15-3	34N	1	30.7585			34T	RIN1	28.3521	28.434	28.393	7.07112	0.00743672	7.43151	0.00579285	10.0465	0.000945572
RPP15-3	34N	2	29.274			34T	LRP4	26.6674	26.5938	26.6306	5.30868	0.0252307	5.66907	0.0196535	8.28408	0.00320806
RUNX1	34N	1	25.6635			34T	VDR	26.5603	26.4752	26.5177	5.19581	0.0272838	5.5562	0.0212528	8.17122	0.00346911
RUNX1	34N	2	25.784			34T	TPO	21.3235	21.0941	21.2088	-0.11309	1.08154	0.247304	0.842469	2.86232	0.137517
SLC1A5	34N	1	27.6038			34T	TP63	28.4392	28.3773	28.4082	7.08631	0.00735883	7.4467	0.00573218	10.0617	0.000935669
SLC1A5	34N	2	27.61			34T	TNIK	25.5749	26.3136	25.9443	4.62234	0.0406011	4.98273	0.0316263	7.59774	0.00516239
ITGA2	34N	1	28.3481			34T	KRT19	22.9186	22.9713	22.945	1.62304	0.324651	1.98343	0.252887	4.59845	0.041279
ITGA2	34N	2	28.7178			34T	GAP43	29.668	28.7509	29.2095	7.88757	0.00422283	8.24797	0.00328938	10.863	0.000536929
SHC4	34N	1	31.552			34T	MATN2	24.2579	24.1069	24.1824	2.86051	0.13769	3.2209	0.107254	5.83591	0.0175071
SHC4	34N	2	32.3446			34T	E2F1	27.9472	27.8631	27.9052	6.58326	0.0104289	6.94366	0.00812364	9.55867	0.00132603
STAC	34N	1	31.8582			34T	CDH16	26.8916	26.7724	26.832	5.5101	0.021943	5.87049	0.0170925	8.4855	0.00279003
STAC	34N	2	32.2296			34T	ALK	33.0898	32.9127	33.0013	11.6793	0.000304906	12.0397	0.000237507	14.6548	3.87686e-05
SPOCD1-2	34N	1	34.0335			34T	ADRA1B-2	29.955	29.9978	29.9764	8.65452	0.00248159	9.01491	0.00193304	11.6299	0.000315532
SPOCD1-2	34N	2	32.9648			34T	ABTB2-2	27.8601	27.8683	27.8642	6.54227	0.0107295	6.90266	0.00835778	9.51768	0.00136425
TFCP2L1	34N	1	26.2188			34T	CHST2-2	24.6914	24.7707	24.7311	3.40914	0.094134	3.76953	0.0733258	6.38455	0.011969
TFCP2L1	34N	2	26.3661			34T	NPC2	19.5685	19.7836	19.6761	-1.64585	3.12933	-1.28546	2.43759	1.32955	0.397891
SLC25A21	34N	1	31.6909			34T	RPP15-3	28.8039	29.1655	28.9847	7.66279	0.00493481	8.02318	0.00384398	10.6382	0.000627456
SLC25A21	34N	2	32.3166			34T	RUNX1	23.2917	23.339	23.3154	1.99345	0.251137	2.35385	0.195623	4.96886	0.0319318
TNC	34N	1	28.8216			34T	SLC1A5	26.0006	25.8023	25.9014	4.57953	0.0418237	4.93993	0.0325787	7.55494	0.00531785
TNC	34N	2	28.958			34T	ITGA2	24.6189	24.5503	24.5846	3.26269	0.104192	3.62308	0.0811602	6.2381	0.0132479
TIAM1-2	34N	1	28.2734			34T	SHC4	31.4911	30.9911	31.2411	9.91918	0.00103283	10.2796	0.000804523	12.8946	0.000131323
TIAM1-2	34N	2	28.6274			34T	STAC	29.2924	29.1163	29.2043	7.88241	0.00423798	8.2428	0.00330119	10.8578	0.000538856
GALNT7	34N	1	26.7055			34T	SPOCD1-2	30.5853	31.3584	30.9719	9.64997	0.00124471	10.0104	0.000969569	12.6254	0.000158264
GALNT7	34N	2	25.7845			34T	TFCP2L1	24.4418	24.457	24.4494	3.12749	0.114428	3.48788	0.089134	6.10289	0.0145494
DUSP6	34N	1	31.3193			34T	SLC25A21	30.9182	30.3806	30.6494	9.32749	0.00155649	9.68788	0.00121243	12.3029	0.000197906
DUSP6	34N	2	30.8824			34T	TNC	27.5364	27.8049	27.6706	6.34872	0.01227	6.70911	0.00955777	9.32412	0.00156013
GALNTL6-2	34N	1	35.3458			34T	TIAM1-2	26.8969	27.2266	27.0617	5.73979	0.0187133	6.10019	0.0145767	8.7152	0.00237938
GALNTL6-2	34N	2	35.6954			34T	GALNT7	23.9916	24.0904	24.041	2.71911	0.151868	3.0795	0.118298	5.69452	0.0193099
KIAA1549L-2	34N	1	36.0017			34T	DUSP6	28.4948	28.4405	28.4676	7.14573	0.00706187	7.50613	0.00550086	10.1211	0.000897911
KIAA1549L-2	34N	2	35.7637			34T	GALNTL6-2	33.8283	33.2986	33.5635	12.2416	0.000206503	12.6019	0.000160856	15.217	2.62566e-05
OAZ1	34N	1	22.1592			34T	KIAA1549L-2	34.7848	36.092	35.4384	14.1165	5.63011e-05	14.4769	4.38558e-05	17.0919	7.15863e-06
OAZ1	34N	2	22.1872			34T	GAPDH	21.3308	21.313	21.3219
β-actin	34N	1	19.2408			34T	OAZ1	20.7654	21.1577	20.9615
β-actin	34N	2	19.2579			34T	β-actin	18.4219	18.2712	18.3465
RUNX2	34T	1	27.1015			35T	RUNX2	28.4742	28.9744	28.7243	9.11338	0.00180551	7.86616	0.00428599	10.0078	0.000971328
RUNX2	34T	2	27.652			35T	MCF2L2-2	30.4937	32.6566	31.5751	11.9642	0.000250275	10.717	0.000594111	12.8586	0.000134643
MCF2L2-2	34T	1	31.6563			35T	NRP2	27.3915	27.6595	27.5255	7.91458	0.00414453	6.66736	0.00983842	8.80895	0.00222967
MCF2L2-2	34T	2	31.4786			35T	RASD2-2	27.8451	27.1754	27.5102	7.89932	0.00418859	6.6521	0.00994302	8.7937	0.00225337
NRP2	34T	1	26.2598			35T	SFTPB	34.7325		34.7325	15.1216	2.80503e-05	13.8744	6.65867e-05	16.016	1.50905e-05
NRP2	34T	2	26.4902			35T	MET	25.9919	25.99	25.991	6.38006	0.0120064	5.13284	0.0285011	7.27444	0.00645917
RASD2-2	34T	1	27.4909			35T	RFX8	30.3119	30.7753	30.5436	10.9327	0.000511608	9.68545	0.00121447	11.827	0.000275235
RASD2-2	34T	2	27.7769			35T	SHC3	30.9133	30.2708	30.5921	10.9811	0.00049471	9.73391	0.00117436	11.8755	0.000266144
SFTPB	34T	1	21.2446			35T	CDH13	26.9272	26.9284	26.9278	7.31687	0.00627197	6.06965	0.0148886	8.21124	0.00337419
SFTPB	34T	2	21.3707			35T	DRAXIN	29.1233	29.005	29.0641	9.45323	0.00142658	8.20601	0.00338646	10.3476	0.000767469
MET	34T	1	22.6823			35T	RAB27A	26.8361	26.9843	26.9102	7.29927	0.00634895	6.05205	0.0150714	8.19364	0.0034156
MET	34T	2	22.7932			35T	C8orf44 SGK3	31.0575	31.8397	31.4486	11.8377	0.000273214	10.5905	0.000648564	12.7321	0.000146983
GAPDH	34T	1	21.3308			35T	HTR7-2	29.244	29.068	29.156	9.5451	0.00133856	8.29788	0.00317753	10.4395	0.00072012
GAPDH	34T	2	21.313			35T	GABBR2	27.3036	27.2706	27.2871	7.67615	0.00488933	6.42893	0.0116065	8.57052	0.00263036
RFX8	34T	1	30.7133			35T	DPP4-2	28.0868	28.1971	28.142	8.53103	0.00270336	7.28381	0.00641733	9.42541	0.00145435
RFX8	34T	2	30.3344			35T	BHLHE40	23.5933	23.5334	23.5634	3.95244	0.0645947	2.70522	0.153337	4.84682	0.0347506
SHC3	34T	1	27.334			35T	ATP10A	28.8041	29.2038	29.0039	9.393	0.00148739	8.14578	0.00353082	10.2874	0.000800185
SHC3	34T	2	28.4101			35T	COL26A1-2	33.1109	34.9752	34.0431	14.4321	4.52369e-05	13.1849	0.000107385	15.3265	2.43365e-05
CDH13	34T	1	27.9911			35T	FAM178B	31.0618	31.2124	31.1371	11.5262	0.000339059	10.279	0.000804869	12.4206	0.000182407
CDH13	34T	2	28.1476			35T	GRM5-2	35.9445	34.6643	35.3044	15.6935	1.88711e-05	14.4462	4.47969e-05	16.5878	1.01523e-05
DRAXIN	34T	1	31.2161			35T	LIPH	33.7789	32.7165	33.2477	13.6368	7.851e-05	12.3895	0.00018637	14.5311	4.22367e-05
DRAXIN	34T	2	31.6286			35T	NRCAM	24.2463	24.2009	24.2236	4.61271	0.0408729	3.36549	0.0970255	5.50709	0.0219888
RAB27A	34T	1	23.9609			35T	NELL2	26.4552	26.4914	26.4733	6.86239	0.00859435	5.61518	0.0204016	7.75677	0.00462358
RAB27A	34T	2	23.9844			35T	RIN1	25.7132	25.6957	25.7044	6.09349	0.0146445	4.84628	0.0347637	6.98787	0.00787846
C8orf44 SGK3	34T	1	31.3558			35T	LRP4	27.763	27.3385	27.5508	7.93984	0.00407259	6.69262	0.00966766	8.83421	0.00219097
C8orf44 SGK3	34T	2	30.4046			35T	VDR	26.4256	26.2245	26.325	6.7141	0.00952478	5.46688	0.0226102	7.60848	0.00512413
HTR7-2	34T	1	30.036			35T	TPO	30.7107	30.2642	30.4875	10.8766	0.000531902	9.62933	0.00126265	11.7709	0.000286152
HTR7-2	34T	2	29.8734			35T	TP63	21.269	21.2666	21.2678	1.65689	0.317121	0.409676	0.752792	2.55127	0.170604
GABBR2	34T	1	27.0156			35T	TNIK	27.1523	27.3354	27.2439	7.63293	0.00503799	6.38572	0.0119594	8.52731	0.00271034
GABBR2	34T	2	27.0765			35T	KRT19	22.3261	22.2669	22.2965	2.6856	0.155437	1.43838	0.368981	3.57998	0.0836216
DPP4-2	34T	1	24.2542			35T	GAP43	31.6216	33.3373	32.4794	12.8685	0.000133717	11.6213	0.000317423	13.7629	7.19372e-05
DPP4-2	34T	2	24.137			35T	MATN2	28.7827	28.4342	28.6085	8.99753	0.00195647	7.75032	0.00464433	9.89191	0.00105254
BHLHE40	34T	1	23.5037			35T	E2F1	26.7645	26.7327	26.7486	7.13767	0.00710143	5.89046	0.0168576	8.03205	0.00382042
BHLHE40	34T	2	23.3479			35T	CDH16		36.2405	36.2405	16.6296	9.86244e-06	15.3824	2.34118e-05	17.524	5.30579e-06
ATP10A	34T	1	27.8514			35T	ALK	35.3283	33.7158	34.522	14.9111	3.24567e-05	13.6639	7.70469e-05	15.8055	1.7461e-05
ATP10A	34T	2	28.1133			35T	ADRA1B-2	32.2768	31.8634	32.0701	12.4592	0.000177587	11.212	0.000421562	13.3536	9.5538e-05
COL26A1-2	34T	1	32.2664			35T	ABTB2-2	28.2682	28.0279	28.1481	8.53713	0.00269195	7.28991	0.00639024	9.43151	0.00144821
COL26A1-2	34T	2	32.0242			35T	CHST2-2	24.1979	24.167	24.1825	4.57154	0.0420561	3.32432	0.0998343	5.46592	0.0226253
FAM178B	34T	1	29.255			35T	NPC2	22.8865	22.9221	22.9043	3.29335	0.102001	2.04613	0.242132	4.18773	0.0548742
FAM178B	34T	2	29.4755			35T	RPP15-3	29.077	30.1027	29.5898	9.97892	0.000990939	8.7317	0.00235233	10.8733	0.000533105
GRM5-2	34T	1	36.7516			35T	RUNX1	21.9284	22.0267	21.9776	2.36664	0.193897	1.11942	0.460279	3.26102	0.104312
GRM5-2	34T	2	35.9466			35T	SLC1A5	26.6614	26.2552	26.4583	6.84742	0.00868401	5.6002	0.0206144	7.7418	0.00467182
LIPH	34T	1	25.9643			35T	ITGA2	26.7727	26.9322	26.8525	7.24153	0.00660816	5.99432	0.0156867	8.13591	0.00355505
LIPH	34T	2	26.0507			35T	SHC4	33.7426	33.9711	33.8568	14.2459	5.14694e-05	12.9987	0.00012218	15.1403	2.76895e-05
NRCAM	34T	1	25.0009			35T	STAC	30.6156	30.3838	30.4997	10.8888	0.000527423	9.64153	0.00125201	11.7831	0.000283742
NRCAM	34T	2	25.3109			35T	SPOCD1-2	30.9057	30.7602	30.8329	11.222	0.00041864	9.97478	0.000993783	12.1164	0.00022522
NELL2	34T	1	24.6381			35T	TFCP2L1	26.209	26.4154	26.3122	6.70129	0.0096097	5.45407	0.0228118	7.59567	0.00516982
NELL2	34T	2	24.6049			35T	SLC25A21	29.5147	29.708	29.6113	10.0004	0.00097628	8.7532	0.00231753	10.8948	0.000525218
RIN1	34T	1	28.3521			35T	TNC	29.214	30.2389	29.7265	10.1155	0.000901402	8.86832	0.00213978	11.0099	0.000484936
RIN1	34T	2	28.434			35T	TIAM1-2	26.1501	26.3269	26.2385	6.62761	0.0101132	5.3804	0.0240071	7.52199	0.0054407
LRP4	34T	1	26.6674			35T	GALNT7	26.2076	26.088	26.1478	6.5369	0.0107695	5.28968	0.0255651	7.43128	0.00579378
LRP4	34T	2	26.5938			35T	DUSP6	29.9576	30.1248	30.0412	10.4303	0.000724734	9.18304	0.0017204	11.3246	0.000389892
VDR	34T	1	26.5603			35T	GALNTL6-2	32.8841	35.4662	34.1752	14.5642	4.12788e-05	13.317	9.7989e-05	15.4586	2.22071e-05
VDR	34T	2	26.4752			35T	KIAA1549L-2	27.0287	27.2341	27.1314	7.52047	0.00544643	6.27326	0.0129289	8.41485	0.00293006
TPO	34T	1	21.3235			35T	GAPDH	19.6321	19.5898	19.6109
TPO	34T	2	21.0941			35T	OAZ1	20.5349	21.1813	20.8581
TP63	34T	1	28.4392			35T	β-actin	18.7901	18.643	18.7165
TP63	34T	2	28.3773
TNIK	34T	1	25.5749
TNIK	34T	2	26.3136
KRT19	34T	1	22.9186
KRT19	34T	2	22.9713
GAP43	34T	1	29.668
GAP43	34T	2	28.7509
MATN2	34T	1	24.2579
MATN2	34T	2	24.1069
E2F1	34T	1	27.9472
E2F1	34T	2	27.8631
CDH16	34T	1	26.8916
CDH16	34T	2	26.7724
ALK	34T	1	33.0898
ALK	34T	2	32.9127
ADRA1B-2	34T	1	29.955
ADRA1B-2	34T	2	29.9978
ABTB2-2	34T	1	27.8601
ABTB2-2	34T	2	27.8683
CHST2-2	34T	1	24.6914
CHST2-2	34T	2	24.7707
NPC2	34T	1	19.5685
NPC2	34T	2	19.7836
RPP15-3	34T	1	28.8039
RPP15-3	34T	2	29.1655
RUNX1	34T	1	23.2917
RUNX1	34T	2	23.339
SLC1A5	34T	1	26.0006
SLC1A5	34T	2	25.8023
ITGA2	34T	1	24.6189
ITGA2	34T	2	24.5503
SHC4	34T	1	31.4911
SHC4	34T	2	30.9911
STAC	34T	1	29.2924
STAC	34T	2	29.1163
SPOCD1-2	34T	1	30.5853
SPOCD1-2	34T	2	31.3584
TFCP2L1	34T	1	24.4418
TFCP2L1	34T	2	24.457
SLC25A21	34T	1	30.9182
SLC25A21	34T	2	30.3806
TNC	34T	1	27.5364
TNC	34T	2	27.8049
TIAM1-2	34T	1	26.8969
TIAM1-2	34T	2	27.2266
GALNT7	34T	1	23.9916
GALNT7	34T	2	24.0904
DUSP6	34T	1	28.4948
DUSP6	34T	2	28.4405
GALNTL6-2	34T	1	33.8283
GALNTL6-2	34T	2	33.2986
KIAA1549L-2	34T	1	34.7848
KIAA1549L-2	34T	2	36.092
OAZ1	34T	1	20.7654
OAZ1	34T	2	21.1577
β-actin	34T	1	18.4219
β-actin	34T	2	18.2712
RUNX2	35T	1	28.4742
RUNX2	35T	2	28.9744
MCF2L2-2	35T	1	30.4937
MCF2L2-2	35T	2	32.6566
NRP2	35T	1	27.3915
NRP2	35T	2	27.6595
RASD2-2	35T	1	27.8451
RASD2-2	35T	2	27.1754
SFTPB	35T	1	34.7325
SFTPB	35T	2
MET	35T	1	25.9919
MET	35T	2	25.99
GAPDH	35T	1	19.6321
GAPDH	35T	2	19.5898
RFX8	35T	1	30.3119
RFX8	35T	2	30.7753
SHC3	35T	1	30.9133
SHC3	35T	2	30.2708
CDH13	35T	1	26.9272
CDH13	35T	2	26.9284
DRAXIN	35T	1	29.1233
DRAXIN	35T	2	29.005
RAB27A	35T	1	26.8361
RAB27A	35T	2	26.9843
C8orf44 SGK3	35T	1	31.0575
C8orf44 SGK3	35T	2	31.8397
HTR7-2	35T	1	29.244
HTR7-2	35T	2	29.068
GABBR2	35T	1	27.3036
GABBR2	35T	2	27.2706
DPP4-2	35T	1	28.0868
DPP4-2	35T	2	28.1971
BHLHE40	35T	1	23.5933
BHLHE40	35T	2	23.5334
ATP10A	35T	1	28.8041
ATP10A	35T	2	29.2038
COL26A1-2	35T	1	33.1109
COL26A1-2	35T	2	34.9752
FAM178B	35T	1	31.0618
FAM178B	35T	2	31.2124
GRM5-2	35T	1	35.9445
GRM5-2	35T	2	34.6643
LIPH	35T	1	33.7789
LIPH	35T	2	32.7165
NRCAM	35T	1	24.2463
NRCAM	35T	2	24.2009
NELL2	35T	1	26.4552
NELL2	35T	2	26.4914
RIN1	35T	1	25.7132
RIN1	35T	2	25.6957
LRP4	35T	1	27.763
LRP4	35T	2	27.3385
VDR	35T	1	26.4256
VDR	35T	2	26.2245
TPO	35T	1	30.7107
TPO	35T	2	30.2642
TP63	35T	1	21.269
TP63	35T	2	21.2666
TNIK	35T	1	27.1523
TNIK	35T	2	27.3354
KRT19	35T	1	22.3261
KRT19	35T	2	22.2669
GAP43	35T	1	31.6216
GAP43	35T	2	33.3373
MATN2	35T	1	28.7827
MATN2	35T	2	28.4342
E2F1	35T	1	26.7645
E2F1	35T	2	26.7327
CDH16	35T	1
CDH16	35T	2	36.2405
ALK	35T	1	35.3283
ALK	35T	2	33.7158
ADRA1B-2	35T	1	32.2768
ADRA1B-2	35T	2	31.8634
ABTB2-2	35T	1	28.2682
ABTB2-2	35T	2	28.0279
CHST2-2	35T	1	24.1979
CHST2-2	35T	2	24.167
NPC2	35T	1	22.8865
NPC2	35T	2	22.9221
RPP15-3	35T	1	29.077
RPP15-3	35T	2	30.1027
RUNX1	35T	1	21.9284
RUNX1	35T	2	22.0267
SLC1A5	35T	1	26.6614
SLC1A5	35T	2	26.2552
ITGA2	35T	1	26.7727
ITGA2	35T	2	26.9322
SHC4	35T	1	33.7426
SHC4	35T	2	33.9711
STAC	35T	1	30.6156
STAC	35T	2	30.3838
SPOCD1-2	35T	1	30.9057
SPOCD1-2	35T	2	30.7602
TFCP2L1	35T	1	26.209
TFCP2L1	35T	2	26.4154
SLC25A21	35T	1	29.5147
SLC25A21	35T	2	29.708
TNC	35T	1	29.214
TNC	35T	2	30.2389
TIAM1-2	35T	1	26.1501
TIAM1-2	35T	2	26.3269
GALNT7	35T	1	26.2076
GALNT7	35T	2	26.088
DUSP6	35T	1	29.9576
DUSP6	35T	2	30.1248
GALNTL6-2	35T	1	32.8841
GALNTL6-2	35T	2	35.4662
KIAA1549L-2	35T	1	27.0287
KIAA1549L-2	35T	2	27.2341
OAZ1	35T	1	20.5349
OAZ1	35T	2	21.1813
β-actin	35T	1	18.7901
β-actin	35T	2	18.643

## Sheet: P6
Raw data (P6)						Data processing (P6)
Target	Sample	Task	CT			Sample	Target	CT1	CT2	Mean CT	△Ct	Relative expression (relative to GAPDH)	△Ct	Relative expression (relative to OAZ1)	△Ct	Relative expression (relative to β-actin)
1 RUNX2	32N	1	25.0543			32N	RUNX2	25.0543	26.0203	25.5373	4.41292	0.0469437	5.17608	0.0276596	7.56693	0.00527384
1 RUNX2	32N	2	26.0203			32N	MCF2L2-2	31.6039	30.9853	31.2946	10.1702	0.0008679	10.9333	0.000511372	13.3242	9.75032e-05
10 MCF2L2-2	32N	1	31.6039			32N	NRP2	25.9761	25.9872	25.9817	4.85727	0.0344998	5.62042	0.0203275	8.01127	0.00387584
10 MCF2L2-2	32N	2	30.9853			32N	RASD2-2	28.1622	28.537	28.3496	7.22524	0.00668322	7.98839	0.0039378	10.3792	0.000750819
11 NRP2	32N	1	25.9761			32N	SFTPB	22.3412	22.4385	22.3898	1.26544	0.415973	2.02859	0.245094	4.41944	0.046732
11 NRP2	32N	2	25.9872			32N	MET	24.9625	24.9696	24.9661	3.84168	0.0697492	4.60484	0.0410966	6.99569	0.00783589
12 RASD2-2	32N	1	28.1622			32N	RFX8	31.0736	30.988	31.0308	9.9064	0.00104202	10.6696	0.000613968	13.0604	0.000117065
12 RASD2-2	32N	2	28.537			32N	SHC3	30.3766	30.7905	30.5835	9.45914	0.00142075	10.2223	0.000837112	12.6131	0.000159612
13 SFTPB	32N	1	22.3412			32N	CDH13	28.6962	28.9438	28.82	7.6956	0.00482386	8.45875	0.00284225	10.8496	0.000541931
13 SFTPB	32N	2	22.4385			32N	DRAXIN	31.8367	31.6057	31.7212	10.5968	0.000645704	11.36	0.000380453	13.7508	7.25408e-05
14 MET	32N	1	24.9625			32N	RAB27A	24.0896	24.1612	24.1254	3.001	0.124913	3.76416	0.0735997	6.15501	0.0140332
14 MET	32N	2	24.9696			32N	C8orf44 SGK3	30.3946	30.4256	30.4101	9.2857	0.00160224	10.0489	0.000944049	12.4397	0.000180002
15 GAPDH	32N	1	21.2043			32N	HTR7-2	29.8226	29.4858	29.6542	8.52977	0.00270572	9.29293	0.00159423	11.6838	0.000303971
15 GAPDH	32N	2	21.0445			32N	GABBR2	30.0687	29.4018	29.7352	8.61084	0.00255787	9.374	0.00150711	11.7648	0.000287361
16 RFX8	32N	1	31.0736			32N	DPP4-2	26.0559	26.1009	26.0784	4.95403	0.0322618	5.71718	0.0190089	8.10804	0.00362442
16 RFX8	32N	2	30.988			32N	BHLHE40	22.9726	22.9128	22.9427	1.8183	0.283555	2.58146	0.167072	4.97231	0.0318556
17 SHC3	32N	1	30.3766			32N	ATP10A	27.4082	27.4185	27.4133	6.28894	0.0127892	7.05209	0.00753545	9.44294	0.00143678
17 SHC3	32N	2	30.7905			32N	COL26A1-2	30.1237	30.0696	30.0966	8.97224	0.00199107	9.7354	0.00117315	12.1262	0.000223684
18 CDH13	32N	1	28.6962			32N	FAM178B	31.9883	32.4052	32.1968	11.0724	0.000464391	11.8355	0.000273622	14.2264	5.21714e-05
18 CDH13	32N	2	28.9438			32N	GRM5-2	34.2935	34.2208	34.2571	13.1327	0.000111342	13.8959	6.56032e-05	16.2867	1.25085e-05
19 DRAXIN	32N	1	31.8367			32N	LIPH	29.9751	32.1696	31.0724	9.948	0.00101241	10.7112	0.000596516	13.102	0.000113737
19 DRAXIN	32N	2	31.6057			32N	NRCAM	25.2617	25.321	25.2913	4.16694	0.0556705	4.9301	0.0328014	7.32095	0.00625424
2 RAB27A	32N	1	24.0896			32N	NELL2	26.0244	26.1136	26.069	4.94457	0.0324741	5.70772	0.0191339	8.09858	0.00364826
2 RAB27A	32N	2	24.1612			32N	RIN1	29.5158	28.987	29.2514	8.12699	0.00357711	8.89014	0.00210766	11.281	0.000401867
20 C8orf44 SGK3	32N	1	30.3946			32N	LRP4	28.9397	29.0822	29.0109	7.88653	0.00422589	8.64968	0.00248992	11.0405	0.000474753
20 C8orf44 SGK3	32N	2	30.4256			32N	VDR	26.2269	26.2972	26.2621	5.1377	0.0284053	5.90085	0.0167366	8.2917	0.00319116
21 HTR7-2	32N	1	29.8226			32N	TPO	20.331	20.3848	20.3579	-0.766485	1.70112	-0.00333	1.00231	2.38752	0.19111
21 HTR7-2	32N	2	29.4858			32N	TP63	28.1054	28.384	28.2447	7.12028	0.00718758	7.88343	0.00423497	10.2743	0.00080748
22 GABBR2	32N	1	30.0687			32N	TNIK	26.1086	26.1685	26.1386	5.01419	0.0309442	5.77734	0.0182325	8.1682	0.00347639
22 GABBR2	32N	2	29.4018			32N	KRT19	24.5714	24.5679	24.5697	3.44529	0.0918047	4.20844	0.0540919	6.5993	0.0103137
23 DPP4-2	32N	1	26.0559			32N	GAP43	30.6331	30.5955	30.6143	9.48993	0.00139074	10.2531	0.000819435	12.6439	0.000156242
23 DPP4-2	32N	2	26.1009			32N	MATN2	24.0805	24.0152	24.0478	2.92342	0.131814	3.68658	0.0776658	6.07743	0.0148085
24 BHLHE40	32N	1	22.9726			32N	E2F1	28.1245	28.2872	28.2059	7.08147	0.00738357	7.84462	0.00435044	10.2355	0.000829498
24 BHLHE40	32N	2	22.9128			32N	CDH16	26.4678	26.5447	26.5063	5.38186	0.0239827	6.14502	0.0141308	8.53587	0.00269431
25 ATP10A	32N	1	27.4082			32N	ALK	34.2543	34.2121	34.2332	13.1088	0.000113203	13.872	6.66996e-05	16.2628	1.27176e-05
25 ATP10A	32N	2	27.4185			32N	ADRA1B-2	32.0361	31.4318	31.734	10.6096	0.000640036	11.3727	0.000377113	13.7636	7.19041e-05
26 COL26A1-2	32N	1	30.1237			32N	ABTB2-2	27.6332	27.6382	27.6357	6.51131	0.0109623	7.27446	0.00645906	9.66531	0.00123155
26 COL26A1-2	32N	2	30.0696			32N	CHST2-2	24.556	24.6004	24.5782	3.45378	0.0912662	4.21693	0.0537746	6.60778	0.0102532
27 FAM178B	32N	1	31.9883			32N	NPC2	20.1536	20.1641	20.1588	-0.96556	1.95282	-0.202405	1.15061	2.18845	0.219387
27 FAM178B	32N	2	32.4052			32N	RPP15-3	29.6238	29.1585	29.3912	8.26678	0.00324677	9.02993	0.00191302	11.4208	0.000364755
28 GRM5-2	32N	1	34.2935			32N	RUNX1	23.7694	23.7868	23.7781	2.65367	0.158915	3.41683	0.0936338	5.80768	0.0178531
28 GRM5-2	32N	2	34.2208			32N	SLC1A5	25.1573	25.2618	25.2095	4.08513	0.0589189	4.84828	0.0347154	7.23913	0.00661918
29 LIPH	32N	1	29.9751			32N	ITGA2	26.4973	26.5995	26.5484	5.42402	0.0232921	6.18717	0.0137238	8.57803	0.00261672
29 LIPH	32N	2	32.1696			32N	SHC4	32.8718	30.6677	31.7698	10.6454	0.000624345	11.4085	0.000367868	13.7994	7.01414e-05
3 NRCAM	32N	1	25.2617			32N	STAC	31.0646	30.6134	30.839	9.7146	0.00119019	10.4778	0.000701266	12.8686	0.00013371
3 NRCAM	32N	2	25.321			32N	SPOCD1-2	31.3448	31.5517	31.4482	10.3238	0.000780221	11.087	0.000459711	13.4778	8.76531e-05
30 NELL2	32N	1	26.0244			32N	TFCP2L1	24.2323	24.3153	24.2738	3.1494	0.112703	3.91255	0.0664056	6.3034	0.0126615
30 NELL2	32N	2	26.1136			32N	SLC25A21	30.4337	30.417	30.4254	9.30095	0.00158539	10.0641	0.000934119	12.455	0.000178108
32 RIN1	32N	1	29.5158			32N	TNC	26.9851	26.9691	26.9771	5.85272	0.0173044	6.61588	0.0101958	9.00673	0.00194404
32 RIN1	32N	2	28.987			32N	TIAM1-2	27.0279	26.9579	26.9929	5.86849	0.0171163	6.63164	0.010085	9.0225	0.00192291
33 LRP4	32N	1	28.9397			32N	GALNT7	24.9001	24.8536	24.8769	3.75246	0.0741989	4.51561	0.0437185	6.90647	0.00833579
33 LRP4	32N	2	29.0822			32N	DUSP6	28.6628	28.6338	28.6483	7.5239	0.00543351	8.28705	0.00320146	10.6779	0.000610421
34 VDR	32N	1	26.2269			32N	GALNTL6-2	33.2888	31.8317	32.5603	11.4359	0.000360955	12.199	0.000212677	14.5899	4.05511e-05
34 VDR	32N	2	26.2972			32N	KIAA1549L-2	34.8868	35.022	34.9544	13.83	6.86689e-05	14.5931	4.04601e-05	16.984	7.71453e-06
35 TPO	32N	1	20.331			32N	GAPDH	21.2043	21.0445	21.1244
35 TPO	32N	2	20.3848			32N	OAZ1	20.3097	20.4128	20.3612
36 TP63	32N	1	28.1054			32N	β-actin	17.9595	17.9813	17.9704
36 TP63	32N	2	28.384			33N	RUNX2	30.0941	29.7259	29.91	8.83262	0.0021934	8.82126	0.00221073	10.6231	0.000634061
37 TNIK	32N	1	26.1086			33N	MCF2L2-2	32.6839	33.4962	33.0901	12.0127	0.000242004	12.0013	0.000243916	13.8032	6.99578e-05
37 TNIK	32N	2	26.1685			33N	NRP2	26.5189	26.6242	26.5716	5.49418	0.0221864	5.48283	0.0223616	7.28466	0.00641357
38 KRT19	32N	1	24.5714			33N	RASD2-2	29.6241	29.477	29.5506	8.47317	0.00281399	8.46182	0.00283622	10.2636	0.00081346
38 KRT19	32N	2	24.5679			33N	SFTPB	25.0269	24.702	24.8645	3.78709	0.0724389	3.77574	0.0730111	5.57757	0.0209404
39 GAP43	32N	1	30.6331			33N	MET	24.6272	24.6642	24.6457	3.5683	0.0843014	3.55695	0.0849673	5.35877	0.0243696
39 GAP43	32N	2	30.5955			33N	RFX8	32.587	31.9515	32.2693	11.1919	0.000427472	11.1805	0.000430848	12.9824	0.000123572
4 MATN2	32N	1	24.0805			33N	SHC3	29.9688	29.9813	29.975	8.89765	0.00209672	8.8863	0.00211328	10.6881	0.000606114
4 MATN2	32N	2	24.0152			33N	CDH13	26.8859	26.8093	26.8476	5.77018	0.0183232	5.75883	0.018468	7.56066	0.00529682
40 E2F1	32N	1	28.1245			33N	DRAXIN	33.434	34.6984	34.0662	12.9888	0.000123024	12.9774	0.000123996	14.7792	3.55634e-05
40 E2F1	32N	2	28.2872			33N	RAB27A	25.302	25.0822	25.1921	4.11469	0.0577237	4.10334	0.0581797	5.90517	0.0166866
41 CDH16	32N	1	26.4678			33N	C8orf44 SGK3	30.7751	31.4024	31.0888	10.0114	0.000968906	10	0.00097656	11.8018	0.000280088
41 CDH16	32N	2	26.5447			33N	HTR7-2	32.9893	31.9154	32.4523	11.3749	0.00037654	11.3636	0.000379514	13.1654	0.000108849
42 ALK	32N	1	34.2543			33N	GABBR2	30.1346	30.5214	30.328	9.25062	0.00164167	9.23927	0.00165464	11.0411	0.00047457
42 ALK	32N	2	34.2121			33N	DPP4-2	28.6707	28.8533	28.762	7.68458	0.00486084	7.67323	0.00489924	9.47505	0.00140516
43 ADRA1B-2	32N	1	32.0361			33N	BHLHE40	24.9791	24.9141	24.9466	3.8692	0.0684311	3.85785	0.0689716	5.65968	0.0197818
43 ADRA1B-2	32N	2	31.4318			33N	ATP10A	28.9876	28.6503	28.819	7.74156	0.0046726	7.73021	0.00470951	9.53203	0.00135074
44 ABTB2-2	32N	1	27.6332			33N	COL26A1-2	31.9943	32.6677	32.331	11.2536	0.000409578	11.2422	0.000412814	13.044	0.0001184
44 ABTB2-2	32N	2	27.6382			33N	FAM178B	31.5367	32.0779	31.8073	10.7299	0.000588805	10.7186	0.000593456	12.5204	0.00017021
45 CHST2-2	32N	1	24.556			33N	GRM5-2	33.3932	33.2889	33.341	12.2636	0.000203365	12.2523	0.000204972	14.0541	5.87882e-05
45 CHST2-2	32N	2	24.6004			33N	LIPH	31.9144	31.7224	31.8184	10.741	0.000584305	10.7296	0.00058892	12.5315	0.000168909
46 NPC2	32N	1	20.1536			33N	NRCAM	26.8983	26.6042	26.7513	5.67388	0.019588	5.66253	0.0197428	7.46436	0.00566245
46 NPC2	32N	2	20.1641			33N	NELL2	25.8733	25.984	25.9287	4.85125	0.034644	4.8399	0.0349176	6.64173	0.0100148
47 RPP15-3	32N	1	29.6238			33N	RIN1	29.5502	29.8134	29.6818	8.60441	0.0025693	8.59306	0.00258959	10.3949	0.000742724
47 RPP15-3	32N	2	29.1585			33N	LRP4	28.7705	28.9662	28.8684	7.79095	0.00451533	7.7796	0.004551	9.58143	0.00130528
48 RUNX1	32N	1	23.7694			33N	VDR	29.4793	29.2887	29.384	8.30661	0.00315837	8.29525	0.00318331	10.0971	0.000913011
48 RUNX1	32N	2	23.7868			33N	TPO	19.6692	19.7335	19.7013	-1.37607	2.5956	-1.38742	2.61611	0.414405	0.750329
49 SLC1A5	32N	1	25.1573			33N	TP63	30.3507	30.4361	30.3934	9.316	0.00156894	9.30464	0.00158133	11.1065	0.000453544
49 SLC1A5	32N	2	25.2618			33N	TNIK	27.4994	27.5382	27.5188	6.44142	0.0115064	6.43007	0.0115973	8.2319	0.00332623
5 ITGA2	32N	1	26.4973			33N	KRT19	24.977	25.0125	24.9947	3.91732	0.0661865	3.90597	0.0667093	5.70779	0.019133
5 ITGA2	32N	2	26.5995			33N	GAP43	33.2105	32.9117	33.0611	11.9837	0.000246918	11.9723	0.000248868	13.7742	7.13782e-05
50 SHC4	32N	1	32.8718			33N	MATN2	22.7024	22.6247	22.6636	1.58617	0.333055	1.57481	0.335686	3.37664	0.0962787
50 SHC4	32N	2	30.6677			33N	E2F1	29.097	28.7926	28.9448	7.86736	0.00428242	7.85601	0.00431625	9.65783	0.00123795
51 STAC	32N	1	31.0646			33N	CDH16	25.0999	25.2312	25.1656	4.08816	0.0587953	4.0768	0.0592597	5.87863	0.0169964
51 STAC	32N	2	30.6134			33N	ALK	35.9907	35.9464	35.9685	14.8911	3.29095e-05	14.8798	3.31695e-05	16.6816	9.51339e-06
52 SPOCD1-2	32N	1	31.3448			33N	ADRA1B-2	31.8531	31.5449	31.699	10.6216	0.000634719	10.6102	0.000639733	12.4121	0.000183483
52 SPOCD1-2	32N	2	31.5517			33N	ABTB2-2	30.13	29.9272	30.0286	8.95122	0.00202029	8.93987	0.00203625	10.7417	0.000584021
53 TFCP2L1	32N	1	24.2323			33N	CHST2-2	25.6741	25.4515	25.5628	4.48541	0.0446435	4.47406	0.0449961	6.27588	0.0129054
53 TFCP2L1	32N	2	24.3153			33N	NPC2	21.1527	21.2941	21.2234	0.14597	0.903772	0.134618	0.910911	1.93644	0.26126
54 SLC25A21	32N	1	30.4337			33N	RPP15-3	31.0061	30.2787	30.6424	9.565	0.00132022	9.55365	0.00133065	11.3555	0.000381647
54 SLC25A21	32N	2	30.417			33N	RUNX1	26.6393	26.8421	26.7407	5.6633	0.0197323	5.65195	0.0198882	7.45377	0.00570415
55 TNC	32N	1	26.9851			33N	SLC1A5	28.5369	28.6458	28.5914	7.51398	0.00547101	7.50263	0.00551423	9.30445	0.00158154
55 TNC	32N	2	26.9691			33N	ITGA2	26.8781	26.6372	26.7576	5.68025	0.0195018	5.6689	0.0196558	7.47072	0.00563752
56 TIAM1-2	32N	1	27.0279			33N	SHC4	32.7578	33.4608	33.1093	12.0319	0.0002388	12.0206	0.000240686	13.8224	6.90316e-05
56 TIAM1-2	32N	2	26.9579			33N	STAC	32.4212	33.3972	32.9092	11.8318	0.000274328	11.8205	0.000276495	13.6223	7.93018e-05
6 GALNT7	32N	1	24.9001			33N	SPOCD1-2	29.9833	30.5691	30.2762	9.19878	0.00170173	9.18743	0.00171518	10.9893	0.000491932
6 GALNT7	32N	2	24.8536			33N	TFCP2L1	24.7953	24.7463	24.7708	3.6934	0.0772991	3.68205	0.0779097	5.48388	0.0223454
7 DUSP6	32N	1	28.6628			33N	SLC25A21	28.9021	30.0854	29.4938	8.41639	0.00292693	8.40504	0.00295005	10.2069	0.000846109
7 DUSP6	32N	2	28.6338			33N	TNC	32.1347	29.9724	31.0536	9.97616	0.000992836	9.96481	0.00100068	11.7666	0.000287006
8 GALNTL6-2	32N	1	33.2888			33N	TIAM1-2	28.8824	28.5961	28.7392	7.66183	0.00493811	7.65047	0.00497712	9.4523	0.00142749
8 GALNTL6-2	32N	2	31.8317			33N	GALNT7	25.4017	25.3579	25.3798	4.30239	0.0506818	4.29104	0.0510822	6.09286	0.0146509
9 KIAA1549L-2	32N	1	34.8868			33N	DUSP6	28.8438	28.857	28.8504	7.77301	0.00457183	7.76166	0.00460795	9.56349	0.00132161
9 KIAA1549L-2	32N	2	35.022			33N	GALNTL6-2	34.0248	33.7775	33.9011	12.8237	0.000137935	12.8124	0.000139024	14.6142	3.98738e-05
OAZ1	32N	1	20.3097			33N	KIAA1549L-2	37.1717	34.4628	35.8172	14.7398	3.6548e-05	14.7285	3.68367e-05	16.5303	1.05652e-05
OAZ1	32N	2	20.4128			33N	GAPDH	21.1029	21.0519	21.0774
β-actin	32N	1	17.9595			33N	OAZ1	21.0894	21.0881	21.0888
β-actin	32N	2	17.9813			33N	β-actin	19.2284	19.3455	19.2869
1 RUNX2	33N	1	30.0941			33T	RUNX2	27.0861	27.1835	27.1348	7.72277	0.00473386	6.82263	0.00883456	8.48935	0.0027826
1 RUNX2	33N	2	29.7259			33T	MCF2L2-2	29.0055	29.6405	29.323	9.91099	0.00103871	9.01085	0.00193849	10.6776	0.000610562
10 MCF2L2-2	33N	1	32.6839			33T	NRP2	26.3494	26.4477	26.3985	6.98651	0.00788591	6.08637	0.0147171	7.75309	0.0046354
10 MCF2L2-2	33N	2	33.4962			33T	RASD2-2	28.3671	28.3906	28.3788	8.96684	0.00199853	8.0667	0.00372976	9.73343	0.00117475
11 NRP2	33N	1	26.5189			33T	SFTPB	21.2167	21.1929	21.2048	1.79282	0.288608	0.892675	0.538615	2.5594	0.169646
11 NRP2	33N	2	26.6242			33T	MET	25.685	25.6984	25.6917	6.27968	0.0128714	5.37954	0.0240213	7.04627	0.00756592
12 RASD2-2	33N	1	29.6241			33T	RFX8	29.4938	29.344	29.4189	10.0069	0.000971888	9.10678	0.00181378	10.7735	0.000571283
12 RASD2-2	33N	2	29.477			33T	SHC3	29.9867	29.5803	29.7835	10.3715	0.000754872	9.47134	0.00140878	11.1381	0.000443719
13 SFTPB	33N	1	25.0269			33T	CDH13	25.3702	25.4273	25.3988	5.98677	0.015769	5.08663	0.0294288	6.75335	0.0092691
13 SFTPB	33N	2	24.702			33T	DRAXIN	30.2014	29.6169	29.9091	10.4971	0.000691901	9.59701	0.00129126	11.2637	0.000406704
14 MET	33N	1	24.6272			33T	RAB27A	25.7687	25.85	25.8094	6.39738	0.0118631	5.49723	0.0221395	7.16396	0.00697321
14 MET	33N	2	24.6642			33T	C8orf44 SGK3	31.5871	30.9372	31.2621	11.8501	0.000270866	10.95	0.000505503	12.6167	0.000159217
15 GAPDH	33N	1	21.1029			33T	HTR7-2	29.0693	29.4222	29.2458	9.83376	0.00109583	8.93362	0.0020451	10.6003	0.000644138
15 GAPDH	33N	2	21.0519			33T	GABBR2	31.0091	31.0292	31.0191	11.6071	0.000320555	10.707	0.000598235	12.3737	0.000188424
16 RFX8	33N	1	32.587			33T	DPP4-2	26.3496	26.4168	26.3832	6.97124	0.00796981	6.0711	0.0148736	7.73782	0.00468471
16 RFX8	33N	2	31.9515			33T	BHLHE40	22.8503	22.4041	22.6272	3.21521	0.107678	2.31506	0.200954	3.98179	0.0632939
17 SHC3	33N	1	29.9688			33T	ATP10A	27.842	28.1886	28.0153	8.60328	0.00257131	7.70314	0.0047987	9.36987	0.00151143
17 SHC3	33N	2	29.9813			33T	COL26A1-2	28.5037	28.491	28.4974	9.08536	0.00184092	8.18522	0.00343562	9.85194	0.00108211
18 CDH13	33N	1	26.8859			33T	FAM178B	28.1893	28.3885	28.2889	8.87689	0.00212711	7.97675	0.00396972	9.64347	0.00125033
18 CDH13	33N	2	26.8093			33T	GRM5-2	34.2552	32.3085	33.2818	13.8698	6.6798e-05	12.9697	0.000124662	14.6364	3.92644e-05
19 DRAXIN	33N	1	33.434			33T	LIPH	26.9229	27.1413	27.0321	7.62008	0.00508307	6.71994	0.00948628	8.38667	0.00298787
19 DRAXIN	33N	2	34.6984			33T	NRCAM	26.5498	26.6581	26.604	7.19198	0.00683908	6.29184	0.0127634	7.95857	0.00402006
2 RAB27A	33N	1	25.302			33T	NELL2	28.7854	28.7505	28.7679	9.35594	0.00152609	8.4558	0.00284806	10.1225	0.000897046
2 RAB27A	33N	2	25.0822			33T	RIN1	27.7696	28.3039	28.0368	8.62477	0.0025333	7.72463	0.00472777	9.39135	0.00148909
20 C8orf44 SGK3	33N	1	30.7751			33T	LRP4	28.3169	28.1156	28.2162	8.80425	0.00223696	7.9041	0.00417472	9.57083	0.0013149
20 C8orf44 SGK3	33N	2	31.4024			33T	VDR	26.7811	26.6704	26.7258	7.31375	0.00628552	6.41361	0.0117303	8.08034	0.00369467
21 HTR7-2	33N	1	32.9893			33T	TPO	23.6802	23.6023	23.6413	4.22925	0.0533173	3.32911	0.0995033	4.99584	0.0313403
21 HTR7-2	33N	2	31.9154			33T	TP63	26.5152	26.3826	26.4489	7.03688	0.00761531	6.13674	0.0142121	7.80347	0.00447633
22 GABBR2	33N	1	30.1346			33T	TNIK	27.9897	27.9819	27.9858	8.57381	0.00262438	7.67367	0.00489775	9.34039	0.00154263
22 GABBR2	33N	2	30.5214			33T	KRT19	22.8677	22.9082	22.888	3.47596	0.0898736	2.57582	0.167726	4.24254	0.0528283
23 DPP4-2	33N	1	28.6707			33T	GAP43	26.3576	27.9665	27.1621	7.75006	0.00464516	6.84991	0.00866903	8.51664	0.00273046
23 DPP4-2	33N	2	28.8533			33T	MATN2	26.7757	26.7029	26.7393	7.32728	0.00622686	6.42714	0.0116209	8.09386	0.00366019
24 BHLHE40	33N	1	24.9791			33T	E2F1	25.8439	25.5913	25.7176	6.30563	0.012642	5.40549	0.0235931	7.07222	0.00743106
24 BHLHE40	33N	2	24.9141			33T	CDH16	26.9286	27.0692	26.9989	7.58688	0.00520141	6.68674	0.00970712	8.35347	0.00305742
25 ATP10A	33N	1	28.9876			33T	ALK	34.3613	34.1682	34.2647	14.8527	3.3797e-05	13.9526	6.30736e-05	15.6193	1.98661e-05
25 ATP10A	33N	2	28.6503			33T	ADRA1B-2	31.4847	31.2671	31.3759	11.9639	0.000250328	11.0638	0.000467174	12.7305	0.000147144
26 COL26A1-2	33N	1	31.9943			33T	ABTB2-2	28.131	28.1068	28.1189	8.70688	0.00239314	7.80674	0.0044662	9.47346	0.00140671
26 COL26A1-2	33N	2	32.6677			33T	CHST2-2	26.4788	26.2097	26.3443	6.93227	0.00818804	6.03213	0.0152809	7.69885	0.00481298
27 FAM178B	33N	1	31.5367			33T	NPC2	21.3466	21.4098	21.3782	1.96624	0.255919	1.0661	0.477609	2.73282	0.150431
27 FAM178B	33N	2	32.0779			33T	RPP15-3	29.0807	28.4775	28.7791	9.36714	0.00151429	8.467	0.00282604	10.1337	0.00089011
28 GRM5-2	33N	1	33.3932			33T	RUNX1	23.502	23.4125	23.4573	4.04528	0.0605689	3.14514	0.113037	4.81186	0.0356028
28 GRM5-2	33N	2	33.2889			33T	SLC1A5	24.4713	24.3312	24.4012	4.98924	0.0314839	4.0891	0.0587567	5.75583	0.0185064
29 LIPH	33N	1	31.9144			33T	ITGA2	24.5991	24.6764	24.6378	5.22577	0.0267231	4.32563	0.0498719	5.99236	0.015708
29 LIPH	33N	2	31.7224			33T	SHC4	31.1468	32.2965	31.7216	12.3096	0.000196983	11.4095	0.00036762	13.0762	0.000115788
3 NRCAM	33N	1	26.8983			33T	STAC	28.9641	28.9188	28.9415	9.52946	0.00135315	8.62932	0.00252532	10.296	0.000795394
3 NRCAM	33N	2	26.6042			33T	SPOCD1-2	26.889	26.7672	26.8281	7.41609	0.00585509	6.51595	0.0109271	8.18268	0.00344166
30 NELL2	33N	1	25.8733			33T	TFCP2L1	27.1907	27.1564	27.1735	7.76153	0.00460835	6.86139	0.00860033	8.52812	0.00270882
30 NELL2	33N	2	25.984			33T	SLC25A21	28.3686	28.7167	28.5426	9.13063	0.00178405	8.23049	0.00332948	9.89722	0.00104868
32 RIN1	33N	1	29.5502			33T	TNC	27.2543	27.1913	27.2228	7.81081	0.0044536	6.91067	0.00831153	8.5774	0.00261786
32 RIN1	33N	2	29.8134			33T	TIAM1-2	28.018	27.9508	27.9844	8.57241	0.00262692	7.67227	0.00490248	9.339	0.00154412
33 LRP4	33N	1	28.7705			33T	GALNT7	24.8809	24.9229	24.9019	5.4899	0.0222523	4.58976	0.0415283	6.25649	0.01308
33 LRP4	33N	2	28.9662			33T	DUSP6	30.4313	30.0997	30.2655	10.8535	0.000540478	9.95333	0.00100867	11.6201	0.000317697
34 VDR	33N	1	29.4793			33T	GALNTL6-2	35.9762	36.022	35.9991	16.5871	1.01576e-05	15.6869	1.89565e-05	17.3537	5.97068e-06
34 VDR	33N	2	29.2887			33T	KIAA1549L-2	32.1088	32.8459	32.4773	13.0653	0.000116666	12.1652	0.000217727	13.8319	6.85769e-05
35 TPO	33N	1	19.6692			33T	GAPDH	19.4295	19.3945	19.412
35 TPO	33N	2	19.7335			33T	OAZ1	20.3602	20.2641	20.3121
36 TP63	33N	1	30.3507			33T	β-actin	18.6418	18.649	18.6454
36 TP63	33N	2	30.4361
37 TNIK	33N	1	27.4994
37 TNIK	33N	2	27.5382
38 KRT19	33N	1	24.977
38 KRT19	33N	2	25.0125
39 GAP43	33N	1	33.2105
39 GAP43	33N	2	32.9117
4 MATN2	33N	1	22.7024
4 MATN2	33N	2	22.6247
40 E2F1	33N	1	29.097
40 E2F1	33N	2	28.7926
41 CDH16	33N	1	25.0999
41 CDH16	33N	2	25.2312
42 ALK	33N	1	35.9907
42 ALK	33N	2	35.9464
43 ADRA1B-2	33N	1	31.8531
43 ADRA1B-2	33N	2	31.5449
44 ABTB2-2	33N	1	30.13
44 ABTB2-2	33N	2	29.9272
45 CHST2-2	33N	1	25.6741
45 CHST2-2	33N	2	25.4515
46 NPC2	33N	1	21.1527
46 NPC2	33N	2	21.2941
47 RPP15-3	33N	1	31.0061
47 RPP15-3	33N	2	30.2787
48 RUNX1	33N	1	26.6393
48 RUNX1	33N	2	26.8421
49 SLC1A5	33N	1	28.5369
49 SLC1A5	33N	2	28.6458
5 ITGA2	33N	1	26.8781
5 ITGA2	33N	2	26.6372
50 SHC4	33N	1	32.7578
50 SHC4	33N	2	33.4608
51 STAC	33N	1	32.4212
51 STAC	33N	2	33.3972
52 SPOCD1-2	33N	1	29.9833
52 SPOCD1-2	33N	2	30.5691
53 TFCP2L1	33N	1	24.7953
53 TFCP2L1	33N	2	24.7463
54 SLC25A21	33N	1	28.9021
54 SLC25A21	33N	2	30.0854
55 TNC	33N	1	32.1347
55 TNC	33N	2	29.9724
56 TIAM1-2	33N	1	28.8824
56 TIAM1-2	33N	2	28.5961
6 GALNT7	33N	1	25.4017
6 GALNT7	33N	2	25.3579
7 DUSP6	33N	1	28.8438
7 DUSP6	33N	2	28.857
8 GALNTL6-2	33N	1	34.0248
8 GALNTL6-2	33N	2	33.7775
9 KIAA1549L-2	33N	1	37.1717
9 KIAA1549L-2	33N	2	34.4628
OAZ1	33N	1	21.0894
OAZ1	33N	2	21.0881
β-actin	33N	1	19.2284
β-actin	33N	2	19.3455
1 RUNX2	33T	1	27.0861
1 RUNX2	33T	2	27.1835
10 MCF2L2-2	33T	1	29.0055
10 MCF2L2-2	33T	2	29.6405
11 NRP2	33T	1	26.3494
11 NRP2	33T	2	26.4477
12 RASD2-2	33T	1	28.3671
12 RASD2-2	33T	2	28.3906
13 SFTPB	33T	1	21.2167
13 SFTPB	33T	2	21.1929
14 MET	33T	1	25.685
14 MET	33T	2	25.6984
15 GAPDH	33T	1	19.4295
15 GAPDH	33T	2	19.3945
16 RFX8	33T	1	29.4938
16 RFX8	33T	2	29.344
17 SHC3	33T	1	29.9867
17 SHC3	33T	2	29.5803
18 CDH13	33T	1	25.3702
18 CDH13	33T	2	25.4273
19 DRAXIN	33T	1	30.2014
19 DRAXIN	33T	2	29.6169
2 RAB27A	33T	1	25.7687
2 RAB27A	33T	2	25.85
20 C8orf44 SGK3	33T	1	31.5871
20 C8orf44 SGK3	33T	2	30.9372
21 HTR7-2	33T	1	29.0693
21 HTR7-2	33T	2	29.4222
22 GABBR2	33T	1	31.0091
22 GABBR2	33T	2	31.0292
23 DPP4-2	33T	1	26.3496
23 DPP4-2	33T	2	26.4168
24 BHLHE40	33T	1	22.8503
24 BHLHE40	33T	2	22.4041
25 ATP10A	33T	1	27.842
25 ATP10A	33T	2	28.1886
26 COL26A1-2	33T	1	28.5037
26 COL26A1-2	33T	2	28.491
27 FAM178B	33T	1	28.1893
27 FAM178B	33T	2	28.3885
28 GRM5-2	33T	1	34.2552
28 GRM5-2	33T	2	32.3085
29 LIPH	33T	1	26.9229
29 LIPH	33T	2	27.1413
3 NRCAM	33T	1	26.5498
3 NRCAM	33T	2	26.6581
30 NELL2	33T	1	28.7854
30 NELL2	33T	2	28.7505
32 RIN1	33T	1	27.7696
32 RIN1	33T	2	28.3039
33 LRP4	33T	1	28.3169
33 LRP4	33T	2	28.1156
34 VDR	33T	1	26.7811
34 VDR	33T	2	26.6704
35 TPO	33T	1	23.6802
35 TPO	33T	2	23.6023
36 TP63	33T	1	26.5152
36 TP63	33T	2	26.3826
37 TNIK	33T	1	27.9897
37 TNIK	33T	2	27.9819
38 KRT19	33T	1	22.8677
38 KRT19	33T	2	22.9082
39 GAP43	33T	1	26.3576
39 GAP43	33T	2	27.9665
4 MATN2	33T	1	26.7757
4 MATN2	33T	2	26.7029
40 E2F1	33T	1	25.8439
40 E2F1	33T	2	25.5913
41 CDH16	33T	1	26.9286
41 CDH16	33T	2	27.0692
42 ALK	33T	1	34.3613
42 ALK	33T	2	34.1682
43 ADRA1B-2	33T	1	31.4847
43 ADRA1B-2	33T	2	31.2671
44 ABTB2-2	33T	1	28.131
44 ABTB2-2	33T	2	28.1068
45 CHST2-2	33T	1	26.4788
45 CHST2-2	33T	2	26.2097
46 NPC2	33T	1	21.3466
46 NPC2	33T	2	21.4098
47 RPP15-3	33T	1	29.0807
47 RPP15-3	33T	2	28.4775
48 RUNX1	33T	1	23.502
48 RUNX1	33T	2	23.4125
49 SLC1A5	33T	1	24.4713
49 SLC1A5	33T	2	24.3312
5 ITGA2	33T	1	24.5991
5 ITGA2	33T	2	24.6764
50 SHC4	33T	1	31.1468
50 SHC4	33T	2	32.2965
51 STAC	33T	1	28.9641
51 STAC	33T	2	28.9188
52 SPOCD1-2	33T	1	26.889
52 SPOCD1-2	33T	2	26.7672
53 TFCP2L1	33T	1	27.1907
53 TFCP2L1	33T	2	27.1564
54 SLC25A21	33T	1	28.3686
54 SLC25A21	33T	2	28.7167
55 TNC	33T	1	27.2543
55 TNC	33T	2	27.1913
56 TIAM1-2	33T	1	28.018
56 TIAM1-2	33T	2	27.9508
6 GALNT7	33T	1	24.8809
6 GALNT7	33T	2	24.9229
7 DUSP6	33T	1	30.4313
7 DUSP6	33T	2	30.0997
8 GALNTL6-2	33T	1	35.9762
8 GALNTL6-2	33T	2	36.022
9 KIAA1549L-2	33T	1	32.1088
9 KIAA1549L-2	33T	2	32.8459
OAZ1	33T	1	20.3602
OAZ1	33T	2	20.2641
β-actin	33T	1	18.6418
β-actin	33T	2	18.649

## Sheet: P7
Raw data (P7)						Data processing (P7)
Sample	Target	Task	CT			Sample	Target	CT1	CT2	Mean CT	△Ct	Relative expression (relative to GAPDH)	△Ct	Relative expression (relative to OAZ1)	△Ct	Relative expression (relative to β-actin)
29N	1 RUNX2	1	29.1212			29N	RUNX2	29.1212	29.9806	29.5509	7.82684	0.00440439	8.32113	0.00312673	9.79636	0.00112461
29N	1 RUNX2	2	29.9806			29N	MCF2L2-2	30.1409	33.3931	31.767	10.043	0.000947906	10.5373	0.000672929	12.0125	0.000242037
29N	10 MCF2L2-2	1	30.1409			29N	NRP2	27.6654	26.951	27.3082	5.58416	0.0208449	6.07845	0.014798	7.55368	0.0053225
29N	10 MCF2L2-2	2	33.3931			29N	RASD2-2	29.4499	29.4935	29.4717	7.74766	0.00465288	8.24195	0.00330314	9.71718	0.00118806
29N	11 NRP2	1	27.6654			29N	SFTPB	30.0397	30.8786	30.4591	8.73509	0.0023468	9.22937	0.00166602	10.7046	0.00059923
29N	11 NRP2	2	26.951			29N	MET	25.6453	25.5696	25.6075	3.8834	0.067761	4.37769	0.0481043	5.85292	0.017302
29N	12 RASD2-2	1	29.4499			29N	RFX8	33.2564	33.9004	33.5784	11.8544	0.000270074	12.3486	0.000191729	13.8239	6.89603e-05
29N	12 RASD2-2	2	29.4935			29N	SHC3	27.4115	28.5244	27.9679	6.24388	0.0131948	6.73817	0.00936715	8.2134	0.00336915
29N	13 SFTPB	1	30.0397			29N	CDH13	27.3186	27.2243	27.2715	5.54742	0.0213826	6.04171	0.0151797	7.51694	0.00545979
29N	13 SFTPB	2	30.8786			29N	DRAXIN	33.8104	33.9751	33.8928	12.1687	0.000217197	12.663	0.000154191	14.1382	5.54589e-05
29N	14 MET	1	25.6453			29N	RAB27A	26.0133	26.0519	26.0326	4.30852	0.0504669	4.80281	0.0358271	6.27803	0.0128862
29N	14 MET	2	25.5696			29N	C8orf44 SGK3	32.1197	31.7522	31.9359	10.2119	0.000843165	10.7062	0.000598573	12.1814	0.000215293
29N	15 GAPDH	1	21.7424			29N	HTR7-2	32.6414	32.7078	32.6746	10.9506	0.000505302	11.4449	0.00035872	12.9201	0.000129023
29N	15 GAPDH	2	21.7057			29N	GABBR2	30.207	30.3873	30.2972	8.57312	0.00262564	9.0674	0.00186397	10.5426	0.000670427
29N	16 RFX8	1	33.2564			29N	DPP4-2	28.3313	28.3778	28.3545	6.63049	0.0100931	7.12478	0.00716518	8.60001	0.00257715
29N	16 RFX8	2	33.9004			29N	BHLHE40	25.6267	25.6524	25.6396	3.91551	0.0662697	4.4098	0.0470456	5.88502	0.0169212
29N	17 SHC3	1	27.4115			29N	ATP10A	28.9296	28.9288	28.9292	7.20519	0.00677676	7.69948	0.0048109	9.17471	0.00173037
29N	17 SHC3	2	28.5244			29N	COL26A1-2	34.9923	35.523	35.2577	13.5336	8.43282e-05	14.0279	5.98656e-05	15.5031	2.15323e-05
29N	18 CDH13	1	27.3186			29N	FAM178B	33.1112	33.5726	33.3419	11.6179	0.000318181	12.1122	0.000225881	13.5874	8.1244e-05
29N	18 CDH13	2	27.2243			29N	GRM5-2	35.9524	32.6402	34.2963	12.5722	0.000164201	13.0665	0.000116568	14.5418	4.19269e-05
29N	19 DRAXIN	1	33.8104			29N	LIPH	33.3678	32.8368	33.1023	11.3783	0.000375662	11.8726	0.000266687	13.3478	9.59211e-05
29N	19 DRAXIN	2	33.9751			29N	NRCAM	28.2901	27.7955	28.0428	6.31872	0.0125278	6.81301	0.00889363	8.28824	0.00319883
29N	2 RAB27A	1	26.0133			29N	NELL2	27.5776	27.519	27.5483	5.82422	0.0176496	6.31851	0.0125297	7.79374	0.00450663
29N	2 RAB27A	2	26.0519			29N	RIN1	30.266	29.9607	30.1133	8.38928	0.00298245	8.88357	0.00211728	10.3588	0.000761536
29N	20 C8orf44 SGK3	1	32.1197			29N	LRP4	28.466	28.5116	28.4888	6.76474	0.00919626	7.25902	0.00652853	8.73425	0.00234816
29N	20 C8orf44 SGK3	2	31.7522			29N	VDR	28.8761	28.8646	28.8703	7.14629	0.00705914	7.64058	0.00501137	9.11581	0.00180247
29N	21 HTR7-2	1	32.6414			29N	TPO	19.8473	20.1676	20.0074	-1.71663	3.28668	-1.22234	2.33326	0.252883	0.839217
29N	21 HTR7-2	2	32.7078			29N	TP63	30.0481	30.2125	30.1303	8.40625	0.00294759	8.90054	0.00209253	10.3758	0.000752633
29N	22 GABBR2	1	30.207			29N	TNIK	27.0766	27.2041	27.1404	5.41632	0.0234166	5.91061	0.0166238	7.38584	0.00597917
29N	22 GABBR2	2	30.3873			29N	KRT19	26.0773	26.1196	26.0985	4.37442	0.0482133	4.86871	0.0342272	6.34394	0.0123107
29N	23 DPP4-2	1	28.3313			29N	GAP43	32.5798	32.8594	32.7196	10.9956	0.000489784	11.4899	0.000347703	12.9651	0.000125061
29N	23 DPP4-2	2	28.3778			29N	MATN2	23.9539	23.9681	23.961	2.23692	0.212138	2.73121	0.150599	4.20644	0.054167
29N	24 BHLHE40	1	25.6267			29N	E2F1	32.0916	30.9576	31.5246	9.80053	0.00112136	10.2948	0.000796067	11.7701	0.000286327
29N	24 BHLHE40	2	25.6524			29N	CDH16	26.9618	26.6785	26.8201	5.0961	0.0292363	5.59038	0.0207552	7.06561	0.00746516
29N	25 ATP10A	1	28.9296			29N	ALK	35.9678	36.2855	36.1266	14.4026	4.6173e-05	14.8969	3.27787e-05	16.3721	1.17897e-05
29N	25 ATP10A	2	28.9288			29N	ADRA1B-2	31.8565	31.7266	31.7916	10.0675	0.0009319	10.5618	0.000661567	12.0371	0.00023795
29N	26 COL26A1-2	1	34.9923			29N	ABTB2-2	29.2536	29.2257	29.2396	7.51559	0.00546491	8.00988	0.0038796	9.4851	0.0013954
29N	26 COL26A1-2	2	35.523			29N	CHST2-2	26.8199	26.7601	26.79	5.06591	0.0298545	5.56019	0.0211941	7.03542	0.00762302
29N	27 FAM178B	1	33.1112			29N	NPC2	21.684	21.5294	21.6067	-0.117329	1.08472	0.376959	0.770059	1.85219	0.276972
29N	27 FAM178B	2	33.5726			29N	RPP15-3	31.8441	31.169	31.5066	9.7825	0.00113547	10.2768	0.00080608	11.752	0.000289928
29N	28 GRM5-2	1	35.9524			29N	RUNX1	27.2181	27.1494	27.1838	5.45973	0.0227226	5.95402	0.016131	7.42925	0.00580195
29N	28 GRM5-2	2	32.6402			29N	SLC1A5	27.6054	27.8881	27.7467	6.02269	0.0153812	6.51698	0.0109193	7.99221	0.0039274
29N	29 LIPH	1	33.3678			29N	ITGA2	28.5344	28.6404	28.5874	6.86338	0.00858852	7.35766	0.00609709	8.83289	0.00219298
29N	29 LIPH	2	32.8368			29N	SHC4	34.9789	33.4701	34.2245	12.5005	0.000172575	12.9948	0.000122513	14.47	4.40652e-05
29N	3 NRCAM	1	28.2901			29N	STAC	33.9815	32.1201	33.0508	11.3267	0.000389324	11.821	0.000276386	13.2963	9.94095e-05
29N	3 NRCAM	2	27.7955			29N	SPOCD1-2	32.9116	33.9866	33.4491	11.7251	0.000295398	12.2193	0.000209706	13.6946	7.54264e-05
29N	30 NELL2	1	27.5776			29N	TFCP2L1	24.5976	24.6647	24.6311	2.90709	0.133315	3.40138	0.0946417	4.87661	0.0340404
29N	30 NELL2	2	27.519			29N	SLC25A21	30.7954	31.1891	30.9923	9.26822	0.00162176	9.76251	0.00115131	11.2377	0.000414099
29N	32 RIN1	1	30.266			29N	TNC	32.4006	32.157	32.2788	10.5548	0.000664814	11.049	0.000471959	12.5243	0.000169753
29N	32 RIN1	2	29.9607			29N	TIAM1-2	28.6464	28.2383	28.4424	6.71832	0.00949696	7.21261	0.006742	8.68784	0.00242494
29N	33 LRP4	1	28.466			29N	GALNT7	26.7995	27.1023	26.9509	5.22685	0.0267031	5.72114	0.0189568	7.19637	0.00681832
29N	33 LRP4	2	28.5116			29N	DUSP6	28.0562	28.3793	28.2177	6.49366	0.0110972	6.98795	0.00787803	8.46318	0.00283354
29N	34 VDR	1	28.8761			29N	GALNTL6-2	32.8165	39.6501	36.2333	14.5092	4.28826e-05	15.0035	3.04429e-05	16.4788	1.09496e-05
29N	34 VDR	2	28.8646			29N	KIAA1549L-2	39.1176	35.5293	37.3234	15.5994	2.01427e-05	16.0937	1.42995e-05	17.5689	5.1432e-06
29N	35 TPO	1	19.8473			29N	GAPDH	21.7424	21.7057	21.7241
29N	35 TPO	2	20.1676			29N	OAZ1	21.3209	21.1386	21.2298
29N	36 TP63	1	30.0481			29N	β-actin	19.551	19.958	19.7545
29N	36 TP63	2	30.2125			30N	RUNX2	30.5381	30.9156	30.7269	8.47492	0.00281057	9.16165	0.00174609	11.6855	0.000303599
29N	37 TNIK	1	27.0766			30N	MCF2L2-2	35.3844	35.079	35.2317	12.9797	0.0001238	13.6664	7.6912e-05	16.1903	1.33729e-05
29N	37 TNIK	2	27.2041			30N	NRP2	26.4156	26.4612	26.4384	4.18644	0.0549232	4.87318	0.0341215	7.39707	0.00593282
29N	38 KRT19	1	26.0773			30N	RASD2-2	29.6654	30.1371	29.9012	7.64927	0.00498129	8.336	0.00309467	10.8599	0.00053808
29N	38 KRT19	2	26.1196			30N	SFTPB	30.1877	30.2504	30.219	7.96708	0.00399641	8.65381	0.00248281	11.1777	0.000431694
29N	39 GAP43	1	32.5798			30N	MET	24.3181	24.2665	24.2923	2.04037	0.243101	2.7271	0.151029	5.25099	0.0262599
29N	39 GAP43	2	32.8594			30N	RFX8	33.199	29.8508	31.5249	9.27295	0.00161645	9.95968	0.00100424	12.4836	0.00017461
29N	4 MATN2	1	23.9539			30N	SHC3	29.395	29.7629	29.5789	7.32698	0.00622817	8.01371	0.00386931	10.5376	0.00067277
29N	4 MATN2	2	23.9681			30N	CDH13	27.8442	27.892	27.8681	5.61615	0.0203878	6.30289	0.0126661	8.82678	0.00220229
29N	40 E2F1	1	32.0916			30N	DRAXIN	35.8736	34.0573	34.9654	12.7135	0.000148889	13.4002	9.24984e-05	15.9241	1.6083e-05
29N	40 E2F1	2	30.9576			30N	RAB27A	25.8065	25.8288	25.8177	3.5657	0.0844534	4.25244	0.0524674	6.77633	0.00912268
29N	41 CDH16	1	26.9618			30N	C8orf44 SGK3	29.9632	31.4881	30.7256	8.47369	0.00281298	9.16042	0.00174759	11.6843	0.000303859
29N	41 CDH16	2	26.6785			30N	HTR7-2	33.8455	33.0205	33.433	11.181	0.000430707	11.8677	0.000267581	14.3916	4.65252e-05
29N	42 ALK	1	35.9678			30N	GABBR2	32.9855	32.2303	32.6079	10.356	0.000763035	11.0427	0.000474042	13.5666	8.24233e-05
29N	42 ALK	2	36.2855			30N	DPP4-2	28.4301	28.5202	28.4751	6.22319	0.0133855	6.90992	0.00831585	9.43381	0.00144591
29N	43 ADRA1B-2	1	31.8565			30N	BHLHE40	24.5794	24.5271	24.5533	2.30132	0.202877	2.98806	0.126039	5.51195	0.0219148
29N	43 ADRA1B-2	2	31.7266			30N	ATP10A	29.4658	29.58	29.5229	7.27092	0.00647492	7.95766	0.0040226	10.4815	0.000699424
29N	44 ABTB2-2	1	29.2536			30N	COL26A1-2	34.3716		34.3716	12.1197	0.00022471	12.8064	0.000139603	15.3303	2.42732e-05
29N	44 ABTB2-2	2	29.2257			30N	FAM178B	33.3466	32.9431	33.1449	10.8929	0.000525911	11.5796	0.000326727	14.1035	5.68091e-05
29N	45 CHST2-2	1	26.8199			30N	GRM5-2	34.2034	36.8285	35.5159	13.264	0.000101658	13.9507	6.3156e-05	16.4746	1.09811e-05
29N	45 CHST2-2	2	26.7601			30N	LIPH	32.4102	32.6296	32.5199	10.268	0.000811024	10.9547	0.000503856	13.4786	8.76071e-05
29N	46 NPC2	1	21.684			30N	NRCAM	28.3752	28.6539	28.5145	6.26258	0.0130249	6.94931	0.00809185	9.47321	0.00140696
29N	46 NPC2	2	21.5294			30N	NELL2	24.5699	24.5285	24.5492	2.29724	0.203452	2.98397	0.126396	5.50787	0.0219769
29N	47 RPP15-3	1	31.8441			30N	RIN1	30.4575	29.6726	30.065	7.81306	0.00444667	8.49979	0.00276253	11.0237	0.000480331
29N	47 RPP15-3	2	31.169			30N	LRP4	28.4968	28.4334	28.4651	6.21315	0.013479	6.89988	0.00837393	9.42377	0.001456
29N	48 RUNX1	1	27.2181			30N	VDR	30.1089	29.1726	29.6408	7.3888	0.00596693	8.07553	0.003707	10.5994	0.00064455
29N	48 RUNX1	2	27.1494			30N	TPO	21.4653	21.2411	21.3532	-0.898739	1.86444	-0.212005	1.1583	2.31189	0.201397
29N	49 SLC1A5	1	27.6054			30N	TP63	30.4346	30.2293	30.332	8.08	0.00369555	8.76673	0.00229589	11.2906	0.000399195
29N	49 SLC1A5	2	27.8881			30N	TNIK	27.3578	27.4125	27.3852	5.13323	0.0284935	5.81996	0.0177018	8.34385	0.00307787
29N	5 ITGA2	1	28.5344			30N	KRT19	25.8859	25.7832	25.8346	3.58259	0.0834702	4.26933	0.0518566	6.79322	0.00901649
29N	5 ITGA2	2	28.6404			30N	GAP43	31.3637	33.4257	32.3947	10.1427	0.000884568	10.8295	0.000549546	13.3534	9.55514e-05
29N	50 SHC4	1	34.9789			30N	MATN2	22.1806	22.1479	22.1642	-0.0877425	1.06271	0.598992	0.660215	3.12288	0.114794
29N	50 SHC4	2	33.4701			30N	E2F1	31.6629	30.5331	31.098	8.84604	0.00217308	9.53278	0.00135004	12.0567	0.000234737
29N	51 STAC	1	33.9815			30N	CDH16	25.2029	25.1982	25.2005	2.94856	0.129538	3.63529	0.0804764	6.15918	0.0139927
29N	51 STAC	2	32.1201			30N	ALK	33.6908	32.9844	33.3376	11.0856	0.000460143	11.7724	0.000285868	14.2963	4.97048e-05
29N	52 SPOCD1-2	1	32.9116			30N	ADRA1B-2	31.5499	31.2651	31.4075	9.1555	0.00175356	9.84223	0.00108942	12.3661	0.000189421
29N	52 SPOCD1-2	2	33.9866			30N	ABTB2-2	30.692	31.1039	30.898	8.64601	0.00249626	9.33275	0.00155083	11.8566	0.000269647
29N	53 TFCP2L1	1	24.5976			30N	CHST2-2	26.5098	26.5928	26.5513	4.29932	0.0507895	4.98606	0.0315534	7.50995	0.00548631
29N	53 TFCP2L1	2	24.6647			30N	NPC2	21.5584	21.8546	21.7065	-0.545482	1.45951	0.141252	0.906732	2.66514	0.157657
29N	54 SLC25A21	1	30.7954			30N	RPP15-3	30.6729	30.3447	30.5088	8.25683	0.00326924	8.94356	0.00203104	11.4675	0.000353145
29N	54 SLC25A21	2	31.1891			30N	RUNX1	27.0518	27.0865	27.0692	4.8172	0.0354714	5.50393	0.0220369	8.02782	0.00383164
29N	55 TNC	1	32.4006			30N	SLC1A5	29.5443	29.1183	29.3313	7.07932	0.00739454	7.76606	0.00459392	10.2899	0.000798761
29N	55 TNC	2	32.157			30N	ITGA2	27.0933	27.4316	27.2624	5.01046	0.0310243	5.69719	0.0192741	8.22108	0.00335126
29N	56 TIAM1-2	1	28.6464			30N	SHC4	33.985	33.5292	33.7571	11.5051	0.000344045	12.1918	0.000213741	14.7157	3.71639e-05
29N	56 TIAM1-2	2	28.2383			30N	STAC	31.9456	31.8575	31.9015	9.64958	0.00124505	10.3363	0.000773497	12.8602	0.000134491
29N	6 GALNT7	1	26.7995			30N	SPOCD1-2	33.9635	33.3067	33.6351	11.3831	0.000374401	12.0699	0.0002326	14.5938	4.04429e-05
29N	6 GALNT7	2	27.1023			30N	TFCP2L1	24.5246	24.4378	24.4812	2.22925	0.21327	2.91598	0.132496	5.43987	0.0230375
29N	7 DUSP6	1	28.0562			30N	SLC25A21	29.6872	30.4682	30.0777	7.82572	0.00440782	8.51245	0.0027384	11.0363	0.000476134
29N	7 DUSP6	2	28.3793			30N	TNC	35.2088	33.6771	34.4429	12.191	0.000213873	12.8777	0.000132871	15.4016	2.31027e-05
29N	8 GALNTL6-2	1	32.8165			30N	TIAM1-2	29.7863	29.9637	29.875	7.62301	0.00507279	8.30974	0.00315151	10.8336	0.000547964
29N	8 GALNTL6-2	2	39.6501			30N	GALNT7	25.7237	25.653	25.6883	3.43635	0.0923754	4.12308	0.057389	6.64697	0.00997843
29N	9 KIAA1549L-2	1	39.1176			30N	DUSP6	27.9666	28.0721	28.0193	5.76739	0.0183588	6.45412	0.0114056	8.97801	0.00198312
29N	9 KIAA1549L-2	2	35.5293			30N	GALNTL6-2	30.3316	31.8255	31.0785	8.82656	0.00220263	9.51329	0.0013684	12.0372	0.000237928
29N	OAZ1	1	21.3209			30N	KIAA1549L-2	35.2957	36.9457	36.1207	13.8687	6.68484e-05	14.5555	4.15302e-05	17.0794	7.22099e-06
29N	OAZ1	2	21.1386			30N	GAPDH	22.1866	22.3174	22.252
29N	β-actin	1	19.551			30N	OAZ1	21.5617	21.5688	21.5652
29N	β-actin	2	19.958			30N	β-actin	18.9624	19.1203	19.0413
30N	1 RUNX2	1	30.5381			30T	RUNX2	27.5776	27.4965	27.537	5.47832	0.0224317	6.08577	0.0147232	8.32449	0.00311946
30N	1 RUNX2	2	30.9156			30T	MCF2L2-2	29.9712	34.4524	32.2118	10.1531	0.000878241	10.7605	0.000576439	12.9993	0.000122133
30N	10 MCF2L2-2	1	35.3844			30T	NRP2	24.9596	25.151	25.0553	2.99661	0.125294	3.60406	0.0822375	5.84278	0.017424
30N	10 MCF2L2-2	2	35.079			30T	RASD2-2	26.3277	26.2205	26.2741	4.2154	0.0538317	4.82285	0.0353328	7.06157	0.00748611
30N	11 NRP2	1	26.4156			30T	SFTPB	22.9643	23.1196	23.0419	0.983239	0.505843	1.59069	0.332013	3.82941	0.0703451
30N	11 NRP2	2	26.4612			30T	MET	22.8844	23.2539	23.0691	1.01044	0.496394	1.61789	0.325811	3.85661	0.0690311
30N	12 RASD2-2	1	29.6654			30T	RFX8	30.857	30.6407	30.7488	8.69015	0.00242106	9.2976	0.00158908	11.5363	0.000336685
30N	12 RASD2-2	2	30.1371			30T	SHC3	29.7163	29.5478	29.632	7.57334	0.00525046	8.18079	0.00344617	10.4195	0.000730157
30N	13 SFTPB	1	30.1877			30T	CDH13	26.3878	26.535	26.4614	4.40273	0.0472766	5.01018	0.0310303	7.24889	0.00657454
30N	13 SFTPB	2	30.2504			30T	DRAXIN	30.9433	31.5505	31.2469	9.18821	0.00171425	9.79565	0.00112516	12.0344	0.000238393
30N	14 MET	1	24.3181			30T	RAB27A	24.4867	24.3946	24.4407	2.38199	0.191845	2.98943	0.125919	5.22815	0.026679
30N	14 MET	2	24.2665			30T	C8orf44 SGK3	30.87	31.6399	31.255	9.19628	0.00170468	9.80373	0.00111888	12.0425	0.000237061
30N	15 GAPDH	1	22.1866			30T	HTR7-2	31.6823	32.3285	32.0054	9.94671	0.00101331	10.5542	0.000665093	12.7929	0.000140916
30N	15 GAPDH	2	22.3174			30T	GABBR2	25.7477	26.0248	25.8862	3.82754	0.0704361	4.43499	0.0462312	6.67371	0.00979521
30N	16 RFX8	1	33.199			30T	DPP4-2	24.8449	24.7428	24.7939	2.73517	0.150187	3.34262	0.098576	5.58134	0.0208857
30N	16 RFX8	2	29.8508			30T	BHLHE40	24.1648	24.2594	24.2121	2.15343	0.224778	2.76088	0.147535	4.99959	0.0312588
30N	17 SHC3	1	29.395			30T	ATP10A	27.8018	27.8735	27.8377	5.77898	0.0182119	6.38643	0.0119535	8.62514	0.00253264
30N	17 SHC3	2	29.7629			30T	COL26A1-2	32.9688	32.2191	32.5939	10.5352	0.000673867	11.1427	0.000442297	13.3814	9.37114e-05
30N	18 CDH13	1	27.8442			30T	FAM178B	29.8048	30.1742	29.9895	7.93084	0.00409806	8.53829	0.00268979	10.777	0.000569897
30N	18 CDH13	2	27.892			30T	GRM5-2	34.8356	34.4528	34.6442	12.5855	0.000162702	13.1929	0.00010679	15.4316	2.26262e-05
30N	19 DRAXIN	1	35.8736			30T	LIPH	25.5708	25.8636	25.7172	3.65852	0.0791912	4.26596	0.0519777	6.50468	0.0110127
30N	19 DRAXIN	2	34.0573			30T	NRCAM	25.3967	31.378	28.3873	6.32865	0.0124419	6.9361	0.00816632	9.17482	0.00173024
30N	2 RAB27A	1	25.8065			30T	NELL2	23.4498	23.793	23.6214	1.5627	0.338516	2.17015	0.222187	4.40887	0.0470758
30N	2 RAB27A	2	25.8288			30T	RIN1	28.4654	28.018	28.2417	6.18301	0.0137635	6.79046	0.00903373	9.02918	0.00191402
30N	20 C8orf44 SGK3	1	29.9632			30T	LRP4	24.7997	24.9379	24.8688	2.81013	0.142583	3.41758	0.093585	5.6563	0.0198283
30N	20 C8orf44 SGK3	2	31.4881			30T	VDR	28.1847	28.4677	28.3262	6.26752	0.0129804	6.87497	0.00851979	9.11368	0.00180513
30N	21 HTR7-2	1	33.8455			30T	TPO	22.3072	22.2981	22.3027	0.243981	0.844412	0.851429	0.554235	3.09015	0.117428
30N	21 HTR7-2	2	33.0205			30T	TP63	27.7104	27.5157	27.6131	5.55437	0.0212798	6.16182	0.0139671	8.40054	0.00295928
30N	22 GABBR2	1	32.9855			30T	TNIK	26.4393	26.6309	26.5351	4.47638	0.0449238	5.08383	0.029486	7.32254	0.00624733
30N	22 GABBR2	2	32.2303			30T	KRT19	23.8504	23.9667	23.9086	1.84989	0.277414	2.45734	0.182082	4.69605	0.0385786
30N	23 DPP4-2	1	28.4301			30T	GAP43	28.1401	28.1327	28.1364	6.07775	0.0148052	6.6852	0.00971749	8.92392	0.00205889
30N	23 DPP4-2	2	28.5202			30T	MATN2	22.989	22.9545	22.9717	0.913031	0.531068	1.52048	0.34857	3.7592	0.0738531
30N	24 BHLHE40	1	24.5794			30T	E2F1	28.9781	28.9847	28.9814	6.92273	0.00824236	7.53018	0.00540992	9.76889	0.00114623
30N	24 BHLHE40	2	24.5271			30T	CDH16	25.8654	26.0562	25.9608	3.90213	0.0668872	4.50957	0.0439018	6.74829	0.00930168
30N	25 ATP10A	1	29.4658			30T	ALK	31.1773	31.1424	31.1598	9.10113	0.0018209	9.70858	0.00119516	11.9473	0.000253224
30N	25 ATP10A	2	29.58			30T	ADRA1B-2	30.3498	29.8169	30.0833	8.02465	0.00384009	8.63209	0.00252047	10.8708	0.000534022
30N	26 COL26A1-2	1	34.3716			30T	ABTB2-2	27.6077	27.9921	27.7999	5.7412	0.018695	6.34865	0.0122706	8.58737	0.00259983
30N	26 COL26A1-2	2				30T	CHST2-2	24.7274	24.8072	24.7673	2.70861	0.152977	3.31606	0.100408	5.55478	0.0212738
30N	27 FAM178B	1	33.3466			30T	NPC2	19.4734	19.6064	19.5399	-2.51883	5.73117	-1.91138	3.76169	0.327338	0.797006
30N	27 FAM178B	2	32.9431			30T	RPP15-3	26.1009	26.2898	26.1954	4.13669	0.0568503	4.74414	0.037314	6.98286	0.00790589
30N	28 GRM5-2	1	34.2034			30T	RUNX1	24.4677	24.5441	24.5059	2.44724	0.183361	3.05469	0.12035	5.29341	0.0254991
30N	28 GRM5-2	2	36.8285			30T	SLC1A5	27.3553	27.3614	27.3584	5.29967	0.0253887	5.90712	0.016664	8.14584	0.00353069
30N	29 LIPH	1	32.4102			30T	ITGA2	25.592	25.897	25.7445	3.68582	0.0777065	4.29327	0.0510032	6.53199	0.0108063
30N	29 LIPH	2	32.6296			30T	SHC4	31.1888	31.3591	31.2739	9.21524	0.00168243	9.82269	0.00110427	12.0614	0.000233967
30N	3 NRCAM	1	28.3752			30T	STAC	29.6426	29.9206	29.7816	7.72293	0.00473333	8.33038	0.00310675	10.5691	0.000658242
30N	3 NRCAM	2	28.6539			30T	SPOCD1-2	32.1084	32.1397	32.1241	10.0654	0.000933287	10.6728	0.000612569	12.9116	0.000129788
30N	30 NELL2	1	24.5699			30T	TFCP2L1	25.7528	25.9608	25.8568	3.7981	0.0718884	4.40555	0.0471844	6.64426	0.00999717
30N	30 NELL2	2	24.5285			30T	SLC25A21	30.4261	30.8364	30.6313	8.57257	0.00262664	9.18001	0.00172401	11.4187	0.000365274
30N	32 RIN1	1	30.4575			30T	TNC	29.6975	30.6728	30.1851	8.12645	0.00357846	8.73389	0.00234875	10.9726	0.000497639
30N	32 RIN1	2	29.6726			30T	TIAM1-2	26.0493	26.4638	26.2565	4.19784	0.054491	4.80529	0.0357655	7.044	0.0075778
30N	33 LRP4	1	28.4968			30T	GALNT7	24.6361	24.9251	24.7806	2.72191	0.151574	3.32936	0.0994864	5.56807	0.0210786
30N	33 LRP4	2	28.4334			30T	DUSP6	27.2535	27.5441	27.3988	5.3401	0.0246871	5.94754	0.0162036	8.18626	0.00343312
30N	34 VDR	1	30.1089			30T	GALNTL6-2	33.4636	31.9307	32.6972	10.6385	0.000627338	11.2459	0.000411758	13.4846	8.72409e-05
30N	34 VDR	2	29.1726			30T	KIAA1549L-2	34.7397	35.7612	35.2505	13.1918	0.000106876	13.7992	7.01489e-05	16.0379	1.48628e-05
30N	35 TPO	1	21.4653			30T	GAPDH	22.059	22.0584	22.0587
30N	35 TPO	2	21.2411			30T	OAZ1	21.2688	21.6336	21.4512
30N	36 TP63	1	30.4346			30T	β-actin	19.2029	19.2222	19.2125
30N	36 TP63	2	30.2293
30N	37 TNIK	1	27.3578
30N	37 TNIK	2	27.4125
30N	38 KRT19	1	25.8859
30N	38 KRT19	2	25.7832
30N	39 GAP43	1	31.3637
30N	39 GAP43	2	33.4257
30N	4 MATN2	1	22.1806
30N	4 MATN2	2	22.1479
30N	40 E2F1	1	31.6629
30N	40 E2F1	2	30.5331
30N	41 CDH16	1	25.2029
30N	41 CDH16	2	25.1982
30N	42 ALK	1	33.6908
30N	42 ALK	2	32.9844
30N	43 ADRA1B-2	1	31.5499
30N	43 ADRA1B-2	2	31.2651
30N	44 ABTB2-2	1	30.692
30N	44 ABTB2-2	2	31.1039
30N	45 CHST2-2	1	26.5098
30N	45 CHST2-2	2	26.5928
30N	46 NPC2	1	21.5584
30N	46 NPC2	2	21.8546
30N	47 RPP15-3	1	30.6729
30N	47 RPP15-3	2	30.3447
30N	48 RUNX1	1	27.0518
30N	48 RUNX1	2	27.0865
30N	49 SLC1A5	1	29.5443
30N	49 SLC1A5	2	29.1183
30N	5 ITGA2	1	27.0933
30N	5 ITGA2	2	27.4316
30N	50 SHC4	1	33.985
30N	50 SHC4	2	33.5292
30N	51 STAC	1	31.9456
30N	51 STAC	2	31.8575
30N	52 SPOCD1-2	1	33.9635
30N	52 SPOCD1-2	2	33.3067
30N	53 TFCP2L1	1	24.5246
30N	53 TFCP2L1	2	24.4378
30N	54 SLC25A21	1	29.6872
30N	54 SLC25A21	2	30.4682
30N	55 TNC	1	35.2088
30N	55 TNC	2	33.6771
30N	56 TIAM1-2	1	29.7863
30N	56 TIAM1-2	2	29.9637
30N	6 GALNT7	1	25.7237
30N	6 GALNT7	2	25.653
30N	7 DUSP6	1	27.9666
30N	7 DUSP6	2	28.0721
30N	8 GALNTL6-2	1	30.3316
30N	8 GALNTL6-2	2	31.8255
30N	9 KIAA1549L-2	1	35.2957
30N	9 KIAA1549L-2	2	36.9457
30N	OAZ1	1	21.5617
30N	OAZ1	2	21.5688
30N	β-actin	1	18.9624
30N	β-actin	2	19.1203
30T	1 RUNX2	1	27.5776
30T	1 RUNX2	2	27.4965
30T	10 MCF2L2-2	1	29.9712
30T	10 MCF2L2-2	2	34.4524
30T	11 NRP2	1	24.9596
30T	11 NRP2	2	25.151
30T	12 RASD2-2	1	26.3277
30T	12 RASD2-2	2	26.2205
30T	13 SFTPB	1	22.9643
30T	13 SFTPB	2	23.1196
30T	14 MET	1	22.8844
30T	14 MET	2	23.2539
30T	15 GAPDH	1	22.059
30T	15 GAPDH	2	22.0584
30T	16 RFX8	1	30.857
30T	16 RFX8	2	30.6407
30T	17 SHC3	1	29.7163
30T	17 SHC3	2	29.5478
30T	18 CDH13	1	26.3878
30T	18 CDH13	2	26.535
30T	19 DRAXIN	1	30.9433
30T	19 DRAXIN	2	31.5505
30T	2 RAB27A	1	24.4867
30T	2 RAB27A	2	24.3946
30T	20 C8orf44 SGK3	1	30.87
30T	20 C8orf44 SGK3	2	31.6399
30T	21 HTR7-2	1	31.6823
30T	21 HTR7-2	2	32.3285
30T	22 GABBR2	1	25.7477
30T	22 GABBR2	2	26.0248
30T	23 DPP4-2	1	24.8449
30T	23 DPP4-2	2	24.7428
30T	24 BHLHE40	1	24.1648
30T	24 BHLHE40	2	24.2594
30T	25 ATP10A	1	27.8018
30T	25 ATP10A	2	27.8735
30T	26 COL26A1-2	1	32.9688
30T	26 COL26A1-2	2	32.2191
30T	27 FAM178B	1	29.8048
30T	27 FAM178B	2	30.1742
30T	28 GRM5-2	1	34.8356
30T	28 GRM5-2	2	34.4528
30T	29 LIPH	1	25.5708
30T	29 LIPH	2	25.8636
30T	3 NRCAM	1	25.3967
30T	3 NRCAM	2	31.378
30T	30 NELL2	1	23.4498
30T	30 NELL2	2	23.793
30T	32 RIN1	1	28.4654
30T	32 RIN1	2	28.018
30T	33 LRP4	1	24.7997
30T	33 LRP4	2	24.9379
30T	34 VDR	1	28.1847
30T	34 VDR	2	28.4677
30T	35 TPO	1	22.3072
30T	35 TPO	2	22.2981
30T	36 TP63	1	27.7104
30T	36 TP63	2	27.5157
30T	37 TNIK	1	26.4393
30T	37 TNIK	2	26.6309
30T	38 KRT19	1	23.8504
30T	38 KRT19	2	23.9667
30T	39 GAP43	1	28.1401
30T	39 GAP43	2	28.1327
30T	4 MATN2	1	22.989
30T	4 MATN2	2	22.9545
30T	40 E2F1	1	28.9781
30T	40 E2F1	2	28.9847
30T	41 CDH16	1	25.8654
30T	41 CDH16	2	26.0562
30T	42 ALK	1	31.1773
30T	42 ALK	2	31.1424
30T	43 ADRA1B-2	1	30.3498
30T	43 ADRA1B-2	2	29.8169
30T	44 ABTB2-2	1	27.6077
30T	44 ABTB2-2	2	27.9921
30T	45 CHST2-2	1	24.7274
30T	45 CHST2-2	2	24.8072
30T	46 NPC2	1	19.4734
30T	46 NPC2	2	19.6064
30T	47 RPP15-3	1	26.1009
30T	47 RPP15-3	2	26.2898
30T	48 RUNX1	1	24.4677
30T	48 RUNX1	2	24.5441
30T	49 SLC1A5	1	27.3553
30T	49 SLC1A5	2	27.3614
30T	5 ITGA2	1	25.592
30T	5 ITGA2	2	25.897
30T	50 SHC4	1	31.1888
30T	50 SHC4	2	31.3591
30T	51 STAC	1	29.6426
30T	51 STAC	2	29.9206
30T	52 SPOCD1-2	1	32.1084
30T	52 SPOCD1-2	2	32.1397
30T	53 TFCP2L1	1	25.7528
30T	53 TFCP2L1	2	25.9608
30T	54 SLC25A21	1	30.4261
30T	54 SLC25A21	2	30.8364
30T	55 TNC	1	29.6975
30T	55 TNC	2	30.6728
30T	56 TIAM1-2	1	26.0493
30T	56 TIAM1-2	2	26.4638
30T	6 GALNT7	1	24.6361
30T	6 GALNT7	2	24.9251
30T	7 DUSP6	1	27.2535
30T	7 DUSP6	2	27.5441
30T	8 GALNTL6-2	1	33.4636
30T	8 GALNTL6-2	2	31.9307
30T	9 KIAA1549L-2	1	34.7397
30T	9 KIAA1549L-2	2	35.7612
30T	OAZ1	1	21.2688
30T	OAZ1	2	21.6336
30T	β-actin	1	19.2029
30T	β-actin	2	19.2222

## Sheet: P8
Raw data (P8)						Data processing (P8)
Sample	Target	Task	CT			Sample	Target	CT1	CT2	Mean CT	△Ct	Relative expression (relative to GAPDH)	△Ct	Relative expression (relative to OAZ1)	△Ct	Relative expression (relative to β-actin)
31N	1 RUNX2	1	27.4229			31N	RUNX2	27.4229	27.8838	27.6533	6.40028	0.0118392	6.68204	0.00973877	9.19134	0.00171053
31N	1 RUNX2	2	27.8838			31N	MCF2L2-2	32.2207	31.0229	31.6218	10.3687	0.000756304	10.6505	0.000622125	13.1598	0.000109271
31N	10 MCF2L2-2	1	32.2207			31N	NRP2	26.2818	26.3985	26.3401	5.08709	0.0294194	5.36885	0.0241999	7.87815	0.00425051
31N	10 MCF2L2-2	2	31.0229			31N	RASD2-2	26.8642	26.5892	26.7267	5.47369	0.0225038	5.75545	0.0185113	8.26475	0.00325135
31N	11 NRP2	1	26.2818			31N	SFTPB	20.6371	20.565	20.6011	-0.651964	1.57131	-0.370202	1.29253	2.13909	0.227022
31N	11 NRP2	2	26.3985			31N	MET	22.1781	22.2394	22.2088	0.955751	0.515573	1.23751	0.424103	3.74681	0.07449
31N	12 RASD2-2	1	26.8642			31N	RFX8	31.0372	30.5697	30.8034	9.55038	0.00133367	9.83215	0.00109706	12.3414	0.000192689
31N	12 RASD2-2	2	26.5892			31N	SHC3	27.9688	28.1245	28.0466	6.79361	0.00901407	7.07537	0.00741485	9.58466	0.00130235
31N	13 SFTPB	1	20.6371			31N	CDH13	26.9254	27.0901	27.0078	5.75474	0.0185204	6.0365	0.0152346	8.5458	0.00267583
31N	13 SFTPB	2	20.565			31N	DRAXIN	32.1292	31.1284	31.6288	10.3758	0.000752624	10.6575	0.000619097	13.1668	0.000108739
31N	14 MET	1	22.1781			31N	RAB27A	24.0863	24.1125	24.0994	2.84637	0.139046	3.12813	0.114377	5.63743	0.0200893
31N	14 MET	2	22.2394			31N	C8orf44 SGK3	30.4173	30.5817	30.4995	9.24644	0.00164643	9.52821	0.00135433	12.0375	0.000237876
31N	15 GAPDH	1	21.3339			31N	HTR7-2	31.3737	31.4192	31.3965	10.1434	0.000884152	10.4252	0.000727291	12.9345	0.000127742
31N	15 GAPDH	2	21.1722			31N	GABBR2	29.5651	28.9915	29.2783	8.02527	0.00383843	8.30703	0.00315744	10.8163	0.000554577
31N	16 RFX8	1	31.0372			31N	DPP4-2	22.6574	22.6329	22.6451	1.39209	0.381012	1.67385	0.313415	4.18315	0.0550487
31N	16 RFX8	2	30.5697			31N	BHLHE40	23.3522	23.2259	23.2891	2.03604	0.243832	2.3178	0.200573	4.8271	0.0352289
31N	17 SHC3	1	27.9688			31N	ATP10A	28.1671	27.8097	27.9884	6.73533	0.00938563	7.01709	0.00772049	9.52639	0.00135604
31N	17 SHC3	2	28.1245			31N	COL26A1-2	31.6332	30.2673	30.9503	9.69723	0.0012046	9.979	0.000990883	12.4883	0.00017404
31N	18 CDH13	1	26.9254			31N	FAM178B	29.2228	28.8764	29.0496	7.79658	0.00449775	8.07834	0.00369978	10.5876	0.000649835
31N	18 CDH13	2	27.0901			31N	GRM5-2	31.1922	36.9493	34.0707	12.8177	0.000138512	13.0995	0.000113938	15.6088	2.00123e-05
31N	19 DRAXIN	1	32.1292			31N	LIPH	25.2001	25.3653	25.2827	4.0297	0.0612265	4.31146	0.0503641	6.82076	0.00884602
31N	19 DRAXIN	2	31.1284			31N	NRCAM	25.1382	25.0103	25.0742	3.82121	0.0707459	4.10297	0.0581945	6.61227	0.0102214
31N	2 RAB27A	1	24.0863			31N	NELL2	24.0399	24.0186	24.0293	2.77622	0.145974	3.05798	0.120076	5.56728	0.0210903
31N	2 RAB27A	2	24.1125			31N	RIN1	28.4621	28.3276	28.3949	7.14184	0.00708094	7.4236	0.00582468	9.9329	0.00102306
31N	20 C8orf44 SGK3	1	30.4173			31N	LRP4	26.314	26.1695	26.2418	4.98872	0.0314954	5.27048	0.0259076	7.77977	0.00455045
31N	20 C8orf44 SGK3	2	30.5817			31N	VDR	27.7911	27.1784	27.4847	6.23168	0.0133069	6.51344	0.0109461	9.02274	0.00192259
31N	21 HTR7-2	1	31.3737			31N	TPO	20.997	20.9378	20.9674	-0.28563	1.21894	-0.0038675	1.00268	2.50543	0.176113
31N	21 HTR7-2	2	31.4192			31N	TP63	27.9521	28.06	28.006	6.75299	0.00927146	7.03475	0.00762657	9.54405	0.00133954
31N	22 GABBR2	1	29.5651			31N	TNIK	25.9576	25.7705	25.8641	4.61102	0.0409209	4.89278	0.0336609	7.40208	0.00591225
31N	22 GABBR2	2	28.9915			31N	KRT19	22.3514	22.1647	22.2581	1.00503	0.49826	1.28679	0.409862	3.79609	0.0719887
31N	23 DPP4-2	1	22.6574			31N	GAP43	30.3826	24.9845	27.6836	6.43053	0.0115936	6.71229	0.00953674	9.22158	0.00167505
31N	23 DPP4-2	2	22.6329			31N	MATN2	23.1073	23.2725	23.1899	1.93684	0.261187	2.21861	0.214849	4.7279	0.0377363
31N	24 BHLHE40	1	23.3522			31N	E2F1	28.593	28.1364	28.3647	7.11164	0.00723073	7.3934	0.0059479	9.9027	0.0010447
31N	24 BHLHE40	2	23.2259			31N	CDH16	25.8595	26.0053	25.9324	4.67936	0.0390277	4.96112	0.0321036	7.47041	0.00563873
31N	25 ATP10A	1	28.1671			31N	ALK	30.9822	31.1916	31.0869	9.83383	0.00109578	10.1156	0.000901373	12.6249	0.000158318
31N	25 ATP10A	2	27.8097			31N	ADRA1B-2	30.2785	29.8623	30.0704	8.81736	0.00221671	9.09912	0.00182344	11.6084	0.000320271
31N	26 COL26A1-2	1	31.6332			31N	ABTB2-2	27.387	27.3123	27.3497	6.09662	0.0146128	6.37838	0.0120203	8.88768	0.00211126
31N	26 COL26A1-2	2	30.2673			31N	CHST2-2	25.1022	25.2252	25.1637	3.9107	0.066491	4.19246	0.0546946	6.70175	0.00960663
31N	27 FAM178B	1	29.2228			31N	NPC2	19.7447	20.0173	19.881	-1.372	2.58829	-1.09024	2.12909	1.41906	0.373957
31N	27 FAM178B	2	28.8764			31N	RPP15-3	29.3741	29.1123	29.2432	7.99019	0.00393291	8.27195	0.00323516	10.7812	0.000568228
31N	28 GRM5-2	1	31.1922			31N	RUNX1	24.0009	23.8942	23.9476	2.69451	0.154479	2.97628	0.127072	5.48557	0.0223192
31N	28 GRM5-2	2	36.9493			31N	SLC1A5	27.1935	26.539	26.8663	5.61323	0.020429	5.895	0.0168046	8.40429	0.00295159
31N	29 LIPH	1	25.2001			31N	ITGA2	25.4012	25.4874	25.4443	4.19129	0.054739	4.47305	0.0450275	6.98234	0.0079087
31N	29 LIPH	2	25.3653			31N	SHC4	30.3008	29.9612	30.131	8.87797	0.00212552	9.15973	0.00174842	11.669	0.000307096
31N	3 NRCAM	1	25.1382			31N	STAC	28.9711	28.3805	28.6758	7.42276	0.00582809	7.70452	0.00479411	10.2138	0.000842043
31N	3 NRCAM	2	25.0103			31N	SPOCD1-2	31.168	30.1722	30.6701	9.41704	0.00146281	9.6988	0.00120329	12.2081	0.000211347
31N	30 NELL2	1	24.0399			31N	TFCP2L1	24.6214	24.7302	24.6758	3.42274	0.0932508	3.7045	0.0767068	6.2138	0.0134729
31N	30 NELL2	2	24.0186			31N	SLC25A21	30.3211	30.1645	30.2428	8.98973	0.00196708	9.27149	0.00161809	11.7808	0.000284204
31N	32 RIN1	1	28.4621			31N	TNC	28.4127	28.0088	28.2107	6.95767	0.00804512	7.23943	0.0066178	9.74873	0.00116236
31N	32 RIN1	2	28.3276			31N	TIAM1-2	27.2222	27.4845	27.3534	6.10032	0.0145754	6.38209	0.0119895	8.89138	0.00210585
31N	33 LRP4	1	26.314			31N	GALNT7	24.0952	24.0052	24.0502	2.79715	0.143872	3.07891	0.118347	5.5882	0.0207866
31N	33 LRP4	2	26.1695			31N	DUSP6	27.9326	27.9571	27.9449	6.69184	0.0096729	6.9736	0.00795679	9.48289	0.00139754
31N	34 VDR	1	27.7911			31N	GALNTL6-2	35.7156	28.9741	32.3448	11.0918	0.00045818	11.3736	0.000376892	13.8829	6.61979e-05
31N	34 VDR	2	27.1784			31N	KIAA1549L-2	33.7009	34.7906	34.2458	12.9928	0.000122684	13.2745	0.000100919	15.7838	1.77255e-05
31N	35 TPO	1	20.997			31N	GAPDH	21.3339	21.1722	21.253
31N	35 TPO	2	20.9378			31N	OAZ1	20.9859	20.9567	20.9713
31N	36 TP63	1	27.9521			31N	β-actin	18.5311	18.3929	18.462
31N	36 TP63	2	28.06			31T	RUNX2	29.9246	29.25	29.5873	8.19782	0.00340574	8.50979	0.00274346	10.9949	0.000490004
31N	37 TNIK	1	25.9576			31T	MCF2L2-2	33.5468	34.6385	34.0926	12.7032	0.000149955	13.0152	0.000120795	15.5003	2.15749e-05
31N	37 TNIK	2	25.7705			31T	NRP2	26.6167	26.5105	26.5636	5.17417	0.0276962	5.48614	0.0223104	7.97127	0.00398482
31N	38 KRT19	1	22.3514			31T	RASD2-2	25.37	28.9775	27.1737	5.78428	0.0181451	6.09624	0.0146166	8.58138	0.00261064
31N	38 KRT19	2	22.1647			31T	SFTPB	25.0853	26.0798	25.5825	4.19309	0.0546707	4.50506	0.0440395	6.99019	0.0078658
31N	39 GAP43	1	30.3826			31T	MET	24.3685	24.2709	24.3197	2.93026	0.131191	3.24223	0.10568	5.72736	0.0188752
31N	39 GAP43	2	24.9845			31T	RFX8	31.9414	32.3143	32.1278	10.7384	0.000585365	11.0503	0.000471536	13.5355	8.422e-05
31N	4 MATN2	1	23.1073			31T	SHC3	29.0387	28.7764	28.9075	7.51809	0.00545545	7.83005	0.00439459	10.3152	0.000784908
31N	4 MATN2	2	23.2725			31T	CDH13	27.2021	27.8397	27.5209	6.13143	0.0142645	6.4434	0.0114906	8.92853	0.00205232
31N	40 E2F1	1	28.593			31T	DRAXIN	33.7145	33.3162	33.5153	12.1259	0.000223741	12.4379	0.000180233	14.923	3.2191e-05
31N	40 E2F1	2	28.1364			31T	RAB27A	25.6204	25.5472	25.5838	4.19437	0.0546221	4.50634	0.0440004	6.99147	0.00785881
31N	41 CDH16	1	25.8595			31T	C8orf44 SGK3	31.0943	30.901	30.9976	9.60816	0.00128132	9.92012	0.00103216	12.4053	0.000184351
31N	41 CDH16	2	26.0053			31T	HTR7-2	32.3989	30.6927	31.5458	10.1563	0.000876265	10.4683	0.000705868	12.9534	0.000126074
31N	42 ALK	1	30.9822			31T	GABBR2	33.2629	32.0954	32.6792	11.2897	0.000399448	11.6017	0.000321772	14.0868	5.7471e-05
31N	42 ALK	2	31.1916			31T	DPP4-2	27.6074	27.9009	27.7542	6.36469	0.0121349	6.67666	0.00977517	9.1618	0.00174592
31N	43 ADRA1B-2	1	30.2785			31T	BHLHE40	25.3887	25.3984	25.3936	4.00411	0.0623221	4.31608	0.0502031	6.80121	0.00896666
31N	43 ADRA1B-2	2	29.8623			31T	ATP10A	28.4199	28.8983	28.6591	7.26967	0.00648056	7.58164	0.00522036	10.0668	0.000932397
31N	44 ABTB2-2	1	27.387			31T	COL26A1-2	32.9638	34.9836	33.9737	12.5842	0.000162841	12.8962	0.000131175	15.3814	2.34289e-05
31N	44 ABTB2-2	2	27.3123			31T	FAM178B	33.2421	32.7616	33.0018	11.6124	0.000319396	11.9243	0.000257287	14.4095	4.59534e-05
31N	45 CHST2-2	1	25.1022			31T	GRM5-2		36.2412	36.2412	14.8518	3.382e-05	15.1637	2.72434e-05	17.6489	4.86589e-06
31N	45 CHST2-2	2	25.2252			31T	LIPH	33.1338	29.9778	31.5558	10.1663	0.000870229	10.4783	0.000701006	12.9634	0.000125205
31N	46 NPC2	1	19.7447			31T	NRCAM	22.4866	27.1589	24.8227	3.43328	0.0925717	3.74525	0.0745704	6.23039	0.0133189
31N	46 NPC2	2	20.0173			31T	NELL2	24.276	24.228	24.252	2.86256	0.137494	3.17453	0.110757	5.65966	0.0197821
31N	47 RPP15-3	1	29.3741			31T	RIN1	29.9791	29.9506	29.9649	8.57541	0.00262146	8.88738	0.00211169	11.3725	0.000377165
31N	47 RPP15-3	2	29.1123			31T	LRP4	28.1853	27.8767	28.031	6.64153	0.0100162	6.95349	0.00806844	9.43863	0.00144109
31N	48 RUNX1	1	24.0009			31T	VDR	29.1855	29.7763	29.4809	8.09145	0.00366632	8.40342	0.00295337	10.8886	0.000527495
31N	48 RUNX1	2	23.8942			31T	TPO	19.8255	19.9688	19.8972	-1.49229	2.81335	-1.18032	2.26627	1.30481	0.404774
31N	49 SLC1A5	1	27.1935			31T	TP63	29.286	29.1545	29.2202	7.83078	0.00439237	8.14275	0.00353824	10.6279	0.000631957
31N	49 SLC1A5	2	26.539			31T	TNIK	26.9935	26.986	26.9898	5.60031	0.0206129	5.91228	0.0166045	8.39741	0.0029657
31N	5 ITGA2	1	25.4012			31T	KRT19	23.7341	23.7595	23.7468	2.35732	0.195153	2.66929	0.157204	5.15442	0.0280779
31N	5 ITGA2	2	25.4874			31T	GAP43	33.5509	33.8616	33.7063	12.3168	0.000196007	12.6288	0.000157892	15.1139	2.82007e-05
31N	50 SHC4	1	30.3008			31T	MATN2	22.4344	22.4611	22.4477	1.05828	0.480206	1.37024	0.386826	3.85538	0.0690901
31N	50 SHC4	2	29.9612			31T	E2F1	30.8785	30.6968	30.7876	9.39817	0.00148207	9.71014	0.00119387	12.1953	0.000213234
31N	51 STAC	1	28.9711			31T	CDH16	25.2037	25.007	25.1053	3.71588	0.0761041	4.02785	0.061305	6.51298	0.0109496
31N	51 STAC	2	28.3805			31T	ALK	33.5403	33.0316	33.286	11.8965	0.000262295	12.2085	0.000211289	14.6936	3.77379e-05
31N	52 SPOCD1-2	1	31.168			31T	ADRA1B-2	29.7025	31.9811	30.8418	9.45235	0.00142745	9.76432	0.00114987	12.2494	0.000205375
31N	52 SPOCD1-2	2	30.1722			31T	ABTB2-2	29.4806	29.76	29.6203	8.23083	0.00332869	8.5428	0.0026814	11.0279	0.000478919
31N	53 TFCP2L1	1	24.6214			31T	CHST2-2	25.7469	25.7785	25.7627	4.37327	0.0482519	4.68524	0.0388689	7.17037	0.0069423
31N	53 TFCP2L1	2	24.7302			31T	NPC2	21.6122	21.4966	21.5544	0.164949	0.89196	0.476918	0.718511	2.96205	0.128332
31N	54 SLC25A21	1	30.3211			31T	RPP15-3	30.1788	29.9798	30.0793	8.68986	0.00242154	9.00183	0.00195065	11.487	0.000348402
31N	54 SLC25A21	2	30.1645			31T	RUNX1	26.765	26.8601	26.8125	5.42309	0.023307	5.73506	0.0187748	8.22019	0.00335332
31N	55 TNC	1	28.4127			31T	SLC1A5	28.0878	28.4263	28.2571	6.86761	0.00856336	7.17958	0.00689814	9.66471	0.00123206
31N	55 TNC	2	28.0088			31T	ITGA2	27.8598	27.9689	27.9144	6.5249	0.0108595	6.83687	0.00874778	9.322	0.00156242
31N	56 TIAM1-2	1	27.2222			31T	SHC4	31.7235	31.9899	31.8567	10.4672	0.000706395	10.7792	0.00056903	13.2643	0.000101633
31N	56 TIAM1-2	2	27.4845			31T	STAC	33.2862	33.3062	33.2962	11.9067	0.000260449	12.2187	0.000209802	14.7038	3.74724e-05
31N	6 GALNT7	1	24.0952			31T	SPOCD1-2	33.2455	32.8414	33.0434	11.654	0.000310312	11.966	0.000249969	14.4511	4.46465e-05
31N	6 GALNT7	2	24.0052			31T	TFCP2L1	23.6414	23.8028	23.7221	2.33264	0.19852	2.64461	0.159916	5.12974	0.0285623
31N	7 DUSP6	1	27.9326			31T	SLC25A21	29.1082	29.2381	29.1732	7.7837	0.0045381	8.09567	0.00365563	10.5808	0.000652923
31N	7 DUSP6	2	27.9571			31T	TNC	31.1583	32.8275	31.9929	10.6034	0.000642758	10.9154	0.000517769	13.4005	9.24775e-05
31N	8 GALNTL6-2	1	35.7156			31T	TIAM1-2	29.0171	28.9431	28.9801	7.59065	0.00518785	7.90262	0.00417903	10.3877	0.000746407
31N	8 GALNTL6-2	2	28.9741			31T	GALNT7	25.1664	25.6988	25.4326	4.04312	0.0606597	4.35509	0.0488639	6.84022	0.00872747
31N	9 KIAA1549L-2	1	33.7009			31T	DUSP6	27.6899	27.9904	27.8401	6.45067	0.0114328	6.76264	0.00920963	9.24777	0.00164491
31N	9 KIAA1549L-2	2	34.7906			31T	GALNTL6-2	31.6746	34.1084	32.8915	11.502	0.000344778	11.814	0.000277733	14.2991	4.96053e-05
31N	OAZ1	1	20.9859			31T	KIAA1549L-2	35.194	36.1776	35.6858	14.2963	4.97033e-05	14.6083	4.0038e-05	17.0934	7.15111e-06
31N	OAZ1	2	20.9567			31T	GAPDH	21.38	21.3989	21.3895
31N	β-actin	1	18.5311			31T	OAZ1	21.1497	21.0053	21.0775
31N	β-actin	2	18.3929			31T	β-actin	18.5904	18.5943	18.5924
31T	1 RUNX2	1	29.9246			32T	RUNX2	27.5608	26.9203	27.2405	5.5576	0.0212322	6.2136	0.0134747	8.27059	0.00323821
31T	1 RUNX2	2	29.25			32T	MCF2L2-2	32.5736	31.7126	32.1431	10.4602	0.000709861	11.1162	0.000450503	13.1732	0.000108264
31T	10 MCF2L2-2	1	33.5468			32T	NRP2	27.0224	26.3392	26.6808	4.99789	0.0312958	5.65389	0.0198614	7.71087	0.00477305
31T	10 MCF2L2-2	2	34.6385			32T	RASD2-2	28.56	28.1182	28.3391	6.65615	0.00991512	7.31216	0.00629248	9.36914	0.00151219
31T	11 NRP2	1	26.6167			32T	SFTPB	22.5335	22.5136	22.5235	0.840588	0.558416	1.49659	0.35439	3.55358	0.0851662
31T	11 NRP2	2	26.5105			32T	MET	23.5522	23.5699	23.5611	1.87816	0.272031	2.53416	0.17264	4.59114	0.0414885
31T	12 RASD2-2	1	25.37			32T	RFX8	31.7312	31.7932	31.7622	10.0793	0.000924352	10.7353	0.000586626	12.7923	0.000140977
31T	12 RASD2-2	2	28.9775			32T	SHC3	29.961	29.3277	29.6443	7.96141	0.00401214	8.61741	0.00254625	10.6744	0.000611908
31T	13 SFTPB	1	25.0853			32T	CDH13	28.5929	28.1064	28.3496	6.6667	0.00984294	7.3227	0.00624667	9.37968	0.00150119
31T	13 SFTPB	2	26.0798			32T	DRAXIN	30.3881	30.5568	30.4724	8.78948	0.00225997	9.44548	0.00143425	11.5025	0.000344676
31T	14 MET	1	24.3685			32T	RAB27A	24.4104	24.2034	24.3069	2.62396	0.162221	3.27996	0.102951	5.33695	0.024741
31T	14 MET	2	24.2709			32T	C8orf44 SGK3	31.5018	31.3238	31.4128	9.72982	0.00117769	10.3858	0.000747403	12.4428	0.000179614
31T	15 GAPDH	1	21.38			32T	HTR7-2	30.8662	30.9137	30.8899	9.207	0.00169206	9.863	0.00107384	11.92	0.000258063
31T	15 GAPDH	2	21.3989			32T	GABBR2	27.2546	26.9969	27.1258	5.44285	0.02299	6.09885	0.0145903	8.15583	0.0035063
31T	16 RFX8	1	31.9414			32T	DPP4-2	25.0605	24.8474	24.954	3.27102	0.103592	3.92702	0.0657428	5.98401	0.0157992
31T	16 RFX8	2	32.3143			32T	BHLHE40	23.9805	23.7809	23.8807	2.19779	0.217972	2.85379	0.138332	4.91077	0.0332437
31T	17 SHC3	1	29.0387			32T	ATP10A	27.9972	28.4509	28.2241	6.54115	0.0107379	7.19715	0.00681464	9.25413	0.00163768
31T	17 SHC3	2	28.7764			32T	COL26A1-2	31.4529	31.1064	31.2796	9.5967	0.00129154	10.2527	0.000819654	12.3097	0.000196977
31T	18 CDH13	1	27.2021			32T	FAM178B	29.6919	30.0415	29.8667	8.18375	0.0034391	8.83976	0.00218257	10.8967	0.00052451
31T	18 CDH13	2	27.8397			32T	GRM5-2	33.2669		33.2669	11.5839	0.000325753	12.2399	0.000206734	14.2969	4.96818e-05
31T	19 DRAXIN	1	33.7145			32T	LIPH	26.4527	26.0675	26.2601	4.57718	0.0418922	5.23318	0.0265862	7.29016	0.00638914
31T	19 DRAXIN	2	33.3162			32T	NRCAM	25.9866	25.3843	25.6855	4.00252	0.0623907	4.65853	0.0395953	6.71551	0.00951546
31T	2 RAB27A	1	25.6204			32T	NELL2	25.4802	25.3769	25.4285	3.74561	0.0745518	4.40161	0.0473132	6.4586	0.0113702
31T	2 RAB27A	2	25.5472			32T	RIN1	29.3586	29.2574	29.308	7.62506	0.00506556	8.28106	0.00321478	10.338	0.000772569
31T	20 C8orf44 SGK3	1	31.0943			32T	LRP4	26.515	26.9037	26.7094	5.02646	0.0306821	5.68246	0.0194719	7.73945	0.00467944
31T	20 C8orf44 SGK3	2	30.901			32T	VDR	27.0357	26.6766	26.8562	5.17324	0.027714	5.82924	0.0175883	7.88623	0.00422677
31T	21 HTR7-2	1	32.3989			32T	TPO	21.3259	21.0367	21.1813	-0.501629	1.41581	0.154372	0.898524	2.21136	0.215931
31T	21 HTR7-2	2	30.6927			32T	TP63	29.3499	28.9812	29.1656	7.48262	0.00559121	8.13863	0.00354838	10.1956	0.000852737
31T	22 GABBR2	1	33.2629			32T	TNIK	26.8742	26.9603	26.9173	5.23436	0.0265645	5.89036	0.0168587	7.94735	0.00405145
31T	22 GABBR2	2	32.0954			32T	KRT19	23.6553	23.6259	23.6406	1.95768	0.257442	2.61368	0.163382	4.67067	0.0392635
31T	23 DPP4-2	1	27.6074			32T	GAP43	23.371	28.7051	26.038	4.35511	0.0488631	5.01111	0.0310103	7.0681	0.00745231
31T	23 DPP4-2	2	27.9009			32T	MATN2	24.9459	24.5943	24.7701	3.08717	0.117671	3.74317	0.0746782	5.80016	0.0179465
31T	24 BHLHE40	1	25.3887			32T	E2F1	29.0403	28.8043	28.9223	7.23934	0.00661822	7.89534	0.00420015	9.95233	0.00100937
31T	24 BHLHE40	2	25.3984			32T	CDH16	27.6222	27.1721	27.3972	5.71426	0.0190475	6.37026	0.0120882	8.42724	0.002905
31T	25 ATP10A	1	28.4199			32T	ALK	33.1969	32.996	33.0964	11.4135	0.000366599	12.0695	0.000232657	14.1265	5.59115e-05
31T	25 ATP10A	2	28.8983			32T	ADRA1B-2	30.9958	30.9758	30.9858	9.3029	0.00158324	9.9589	0.00100478	12.0159	0.000241467
31T	26 COL26A1-2	1	32.9638			32T	ABTB2-2	27.6728	27.8336	27.7532	6.07028	0.0148821	6.72628	0.00944472	8.78326	0.00226973
31T	26 COL26A1-2	2	34.9836			32T	CHST2-2	25.3325	25.2626	25.2975	3.61461	0.0816381	4.27061	0.0518104	6.3276	0.0124509
31T	27 FAM178B	1	33.2421			32T	NPC2	20.0945	19.9964	20.0454	-1.6375	3.11125	-0.981495	1.97451	1.07549	0.47451
31T	27 FAM178B	2	32.7616			32T	RPP15-3	28.4082	28.535	28.4716	6.78865	0.00904507	7.44465	0.00574032	9.50164	0.0013795
31T	28 GRM5-2	1				32T	RUNX1	24.2696	24.1472	24.2084	2.52547	0.173683	3.18147	0.110225	5.23846	0.026489
31T	28 GRM5-2	2	36.2412			32T	SLC1A5	26.5749	26.042	26.3085	4.62552	0.0405115	5.28153	0.02571	7.33851	0.00617857
31T	29 LIPH	1	33.1338			32T	ITGA2	25.1155	25.0993	25.1074	3.42451	0.0931367	4.08051	0.0591078	6.13749	0.0142046
31T	29 LIPH	2	29.9778			32T	SHC4	31.1177	30.9963	31.057	9.37407	0.00150703	10.0301	0.000956415	12.0871	0.000229843
31T	3 NRCAM	1	22.4866			32T	STAC	30.1617	29.9412	30.0515	8.36852	0.00302568	9.02453	0.0019202	11.0815	0.000461458
31T	3 NRCAM	2	27.1589			32T	SPOCD1-2	32.2238	32.0968	32.1603	10.4773	0.000701465	11.1333	0.000445174	13.1903	0.000106983
31T	30 NELL2	1	24.276			32T	TFCP2L1	25.357	25.2663	25.3117	3.62872	0.0808435	4.28473	0.0513061	6.34171	0.0123298
31T	30 NELL2	2	24.228			32T	SLC25A21	30.842	30.8466	30.8443	9.16132	0.00174649	9.81732	0.00110839	11.8743	0.000266365
31T	32 RIN1	1	29.9791			32T	TNC	28.933	29.0095	28.9713	7.28833	0.00639727	7.94433	0.00405993	10.0013	0.000975672
31T	32 RIN1	2	29.9506			32T	TIAM1-2	27.3621	27.3339	27.348	5.66505	0.0197083	6.32105	0.0125076	8.37804	0.00300579
31T	33 LRP4	1	28.1853			32T	GALNT7	24.3479	24.3148	24.3313	2.64842	0.159495	3.30442	0.101221	5.36141	0.0243252
31T	33 LRP4	2	27.8767			32T	DUSP6	28.9635	28.6232	28.7934	7.11042	0.00723685	7.76642	0.00459276	9.82341	0.00110372
31T	34 VDR	1	29.1855			32T	GALNTL6-2	37.924		37.924	16.2411	1.29105e-05	16.8971	8.19348e-06	18.9541	1.96904e-06
31T	34 VDR	2	29.7763			32T	KIAA1549L-2	39.1791	37.1839	38.1815	16.4986	1.08004e-05	17.1546	6.85429e-06	19.2115	1.64721e-06
31T	35 TPO	1	19.8255			32T	GAPDH	21.7842	21.5817	21.6829
31T	35 TPO	2	19.9688			32T	OAZ1	20.9871	21.0667	21.0269
31T	36 TP63	1	29.286			32T	β-actin	19.0152	18.9247	18.9699
31T	36 TP63	2	29.1545
31T	37 TNIK	1	26.9935
31T	37 TNIK	2	26.986
31T	38 KRT19	1	23.7341
31T	38 KRT19	2	23.7595
31T	39 GAP43	1	33.5509
31T	39 GAP43	2	33.8616
31T	4 MATN2	1	22.4344
31T	4 MATN2	2	22.4611
31T	40 E2F1	1	30.8785
31T	40 E2F1	2	30.6968
31T	41 CDH16	1	25.2037
31T	41 CDH16	2	25.007
31T	42 ALK	1	33.5403
31T	42 ALK	2	33.0316
31T	43 ADRA1B-2	1	29.7025
31T	43 ADRA1B-2	2	31.9811
31T	44 ABTB2-2	1	29.4806
31T	44 ABTB2-2	2	29.76
31T	45 CHST2-2	1	25.7469
31T	45 CHST2-2	2	25.7785
31T	46 NPC2	1	21.6122
31T	46 NPC2	2	21.4966
31T	47 RPP15-3	1	30.1788
31T	47 RPP15-3	2	29.9798
31T	48 RUNX1	1	26.765
31T	48 RUNX1	2	26.8601
31T	49 SLC1A5	1	28.0878
31T	49 SLC1A5	2	28.4263
31T	5 ITGA2	1	27.8598
31T	5 ITGA2	2	27.9689
31T	50 SHC4	1	31.7235
31T	50 SHC4	2	31.9899
31T	51 STAC	1	33.2862
31T	51 STAC	2	33.3062
31T	52 SPOCD1-2	1	33.2455
31T	52 SPOCD1-2	2	32.8414
31T	53 TFCP2L1	1	23.6414
31T	53 TFCP2L1	2	23.8028
31T	54 SLC25A21	1	29.1082
31T	54 SLC25A21	2	29.2381
31T	55 TNC	1	31.1583
31T	55 TNC	2	32.8275
31T	56 TIAM1-2	1	29.0171
31T	56 TIAM1-2	2	28.9431
31T	6 GALNT7	1	25.1664
31T	6 GALNT7	2	25.6988
31T	7 DUSP6	1	27.6899
31T	7 DUSP6	2	27.9904
31T	8 GALNTL6-2	1	31.6746
31T	8 GALNTL6-2	2	34.1084
31T	9 KIAA1549L-2	1	35.194
31T	9 KIAA1549L-2	2	36.1776
31T	OAZ1	1	21.1497
31T	OAZ1	2	21.0053
31T	β-actin	1	18.5904
31T	β-actin	2	18.5943
32T	1 RUNX2	1	27.5608
32T	1 RUNX2	2	26.9203
32T	10 MCF2L2-2	1	32.5736
32T	10 MCF2L2-2	2	31.7126
32T	11 NRP2	1	27.0224
32T	11 NRP2	2	26.3392
32T	12 RASD2-2	1	28.56
32T	12 RASD2-2	2	28.1182
32T	13 SFTPB	1	22.5335
32T	13 SFTPB	2	22.5136
32T	14 MET	1	23.5522
32T	14 MET	2	23.5699
32T	15 GAPDH	1	21.7842
32T	15 GAPDH	2	21.5817
32T	16 RFX8	1	31.7312
32T	16 RFX8	2	31.7932
32T	17 SHC3	1	29.961
32T	17 SHC3	2	29.3277
32T	18 CDH13	1	28.5929
32T	18 CDH13	2	28.1064
32T	19 DRAXIN	1	30.3881
32T	19 DRAXIN	2	30.5568
32T	2 RAB27A	1	24.4104
32T	2 RAB27A	2	24.2034
32T	20 C8orf44 SGK3	1	31.5018
32T	20 C8orf44 SGK3	2	31.3238
32T	21 HTR7-2	1	30.8662
32T	21 HTR7-2	2	30.9137
32T	22 GABBR2	1	27.2546
32T	22 GABBR2	2	26.9969
32T	23 DPP4-2	1	25.0605
32T	23 DPP4-2	2	24.8474
32T	24 BHLHE40	1	23.9805
32T	24 BHLHE40	2	23.7809
32T	25 ATP10A	1	27.9972
32T	25 ATP10A	2	28.4509
32T	26 COL26A1-2	1	31.4529
32T	26 COL26A1-2	2	31.1064
32T	27 FAM178B	1	29.6919
32T	27 FAM178B	2	30.0415
32T	28 GRM5-2	1	33.2669
32T	28 GRM5-2	2
32T	29 LIPH	1	26.4527
32T	29 LIPH	2	26.0675
32T	3 NRCAM	1	25.9866
32T	3 NRCAM	2	25.3843
32T	30 NELL2	1	25.4802
32T	30 NELL2	2	25.3769
32T	32 RIN1	1	29.3586
32T	32 RIN1	2	29.2574
32T	33 LRP4	1	26.515
32T	33 LRP4	2	26.9037
32T	34 VDR	1	27.0357
32T	34 VDR	2	26.6766
32T	35 TPO	1	21.3259
32T	35 TPO	2	21.0367
32T	36 TP63	1	29.3499
32T	36 TP63	2	28.9812
32T	37 TNIK	1	26.8742
32T	37 TNIK	2	26.9603
32T	38 KRT19	1	23.6553
32T	38 KRT19	2	23.6259
32T	39 GAP43	1	23.371
32T	39 GAP43	2	28.7051
32T	4 MATN2	1	24.9459
32T	4 MATN2	2	24.5943
32T	40 E2F1	1	29.0403
32T	40 E2F1	2	28.8043
32T	41 CDH16	1	27.6222
32T	41 CDH16	2	27.1721
32T	42 ALK	1	33.1969
32T	42 ALK	2	32.996
32T	43 ADRA1B-2	1	30.9958
32T	43 ADRA1B-2	2	30.9758
32T	44 ABTB2-2	1	27.6728
32T	44 ABTB2-2	2	27.8336
32T	45 CHST2-2	1	25.3325
32T	45 CHST2-2	2	25.2626
32T	46 NPC2	1	20.0945
32T	46 NPC2	2	19.9964
32T	47 RPP15-3	1	28.4082
32T	47 RPP15-3	2	28.535
32T	48 RUNX1	1	24.2696
32T	48 RUNX1	2	24.1472
32T	49 SLC1A5	1	26.5749
32T	49 SLC1A5	2	26.042
32T	5 ITGA2	1	25.1155
32T	5 ITGA2	2	25.0993
32T	50 SHC4	1	31.1177
32T	50 SHC4	2	30.9963
32T	51 STAC	1	30.1617
32T	51 STAC	2	29.9412
32T	52 SPOCD1-2	1	32.2238
32T	52 SPOCD1-2	2	32.0968
32T	53 TFCP2L1	1	25.357
32T	53 TFCP2L1	2	25.2663
32T	54 SLC25A21	1	30.842
32T	54 SLC25A21	2	30.8466
32T	55 TNC	1	28.933
32T	55 TNC	2	29.0095
32T	56 TIAM1-2	1	27.3621
32T	56 TIAM1-2	2	27.3339
32T	6 GALNT7	1	24.3479
32T	6 GALNT7	2	24.3148
32T	7 DUSP6	1	28.9635
32T	7 DUSP6	2	28.6232
32T	8 GALNTL6-2	1	37.924
32T	8 GALNTL6-2	2
32T	9 KIAA1549L-2	1	39.1791
32T	9 KIAA1549L-2	2	37.1839
32T	OAZ1	1	20.9871
32T	OAZ1	2	21.0667
32T	β-actin	1	19.0152
32T	β-actin	2	18.9247

## Sheet: P9
Raw data (P9)						Data processing (P9)
Sample	Target	Task	CT			Sample	Target	CT1	CT2	Mean CT	△Ct	Relative expression (relative to GAPDH)	△Ct	Relative expression (relative to OAZ1)	△Ct	Relative expression (relative to β-actin)
28N	1 RUNX2	1	27.5803			28N	RUNX2	27.5803	28.0072	27.7937	7.04729	0.00756057	7.4579	0.00568787	9.78543	0.00113317
28N	1 RUNX2	2	28.0072			28N	MCF2L2-2	29.0311	31.5968	30.3139	9.56749	0.00131795	9.97809	0.000991504	12.3056	0.000197532
28N	10 MCF2L2-2	1	29.0311			28N	NRP2	26.6141	26.6716	26.6429	5.89639	0.0167884	6.307	0.01263	8.63453	0.00251621
28N	10 MCF2L2-2	2	31.5968			28N	RASD2-2	25.2	28.1393	26.6697	5.9232	0.0164793	6.33381	0.0123975	8.66134	0.00246989
28N	11 NRP2	1	26.6141			28N	SFTPB	23.9849	24.2063	24.0956	3.34916	0.0981303	3.75976	0.0738241	6.08729	0.0147076
28N	11 NRP2	2	26.6716			28N	MET	24.45	24.5344	24.4922	3.74577	0.0745437	4.15638	0.0560798	6.48391	0.0111725
28N	12 RASD2-2	1	25.2			28N	RFX8	31.462	31.8855	31.6737	10.9273	0.000513528	11.3379	0.000386331	13.6654	7.69668e-05
28N	12 RASD2-2	2	28.1393			28N	SHC3	29.2905	29.5864	29.4384	8.69198	0.00241798	9.10259	0.00181906	11.4301	0.000362403
28N	13 SFTPB	1	23.9849			28N	CDH13	27.894	28.0463	27.9701	7.22366	0.00669053	7.63427	0.00503334	9.9618	0.00100277
28N	13 SFTPB	2	24.2063			28N	DRAXIN	31.1607	31.4704	31.3156	10.5691	0.00065824	10.9797	0.000495199	13.3072	9.86559e-05
28N	14 MET	1	24.45			28N	RAB27A	24.1555	24.2559	24.2057	3.45922	0.0909222	3.86983	0.0684014	6.19736	0.0136273
28N	14 MET	2	24.5344			28N	C8orf44 SGK3	30.7543	29.9953	30.3748	9.62835	0.00126351	10.039	0.000950548	12.3665	0.000189373
28N	15 GAPDH	1	20.6967			28N	HTR7-2	30.8826	31.4003	31.1415	10.395	0.000742655	10.8056	0.000558704	13.1332	0.000111308
28N	15 GAPDH	2	20.7962			28N	GABBR2	30.5278	30.5172	30.5225	9.77604	0.00114056	10.1866	0.000858052	12.5142	0.000170945
28N	16 RFX8	1	31.462			28N	DPP4-2	25.6175	25.9049	25.7612	5.01472	0.0309328	5.42532	0.023271	7.75285	0.00463616
28N	16 RFX8	2	31.8855			28N	BHLHE40	24.2404	24.3921	24.3163	3.5698	0.0842141	3.9804	0.0633549	6.30793	0.0126219
28N	17 SHC3	1	29.2905			28N	ATP10A	28.2541	28.5976	28.4259	7.67939	0.00487834	8.09	0.00367001	10.4175	0.000731157
28N	17 SHC3	2	29.5864			28N	COL26A1-2	32.9854	32.7955	32.8905	12.144	0.000220949	12.5546	0.000166221	14.8821	3.31155e-05
28N	18 CDH13	1	27.894			28N	FAM178B	31.8733	31.7081	31.7907	11.0442	0.000473535	11.4548	0.000356244	13.7824	7.09726e-05
28N	18 CDH13	2	28.0463			28N	GRM5-2	35.5014		35.5014	14.755	3.61664e-05	15.1656	2.72083e-05	17.4931	5.42057e-06
28N	19 DRAXIN	1	31.1607			28N	LIPH	30.7317	30.8672	30.7994	10.053	0.000941359	10.4636	0.000708191	12.7911	0.000141089
28N	19 DRAXIN	2	31.4704			28N	NRCAM	27.1775	26.9153	27.0464	6.29992	0.0126922	6.71052	0.00954842	9.03805	0.00190228
28N	2 RAB27A	1	24.1555			28N	NELL2	26.116	25.9763	26.0462	5.29971	0.0253879	5.71032	0.0190995	8.03785	0.0038051
28N	2 RAB27A	2	24.2559			28N	RIN1	29.3416	28.3897	28.8656	8.11919	0.00359651	8.52979	0.00270568	10.8573	0.000539039
28N	20 C8orf44 SGK3	1	30.7543			28N	LRP4	28.3584	28.373	28.3657	7.61926	0.00508598	8.02986	0.00382622	10.3574	0.000762278
28N	20 C8orf44 SGK3	2	29.9953			28N	VDR	26.9915	26.9847	26.9881	6.24164	0.0132153	6.65225	0.00994199	8.97978	0.00198069
28N	21 HTR7-2	1	30.8826			28N	TPO	19.4939	19.4679	19.4809	-1.26555	2.40419	-0.854942	1.80869	1.47259	0.360335
28N	21 HTR7-2	2	31.4003			28N	TP63	27.7722	27.6817	27.7269	6.98049	0.00791886	7.3911	0.00595742	9.71863	0.00118687
28N	22 GABBR2	1	30.5278			28N	TNIK	25.3045	25.6793	25.4919	4.74542	0.0372809	5.15603	0.0280467	7.48356	0.00558759
28N	22 GABBR2	2	30.5172			28N	KRT19	24.0952	24.4257	24.2604	3.51398	0.0875359	3.92459	0.0658539	6.25212	0.0131197
28N	23 DPP4-2	1	25.6175			28N	GAP43	31.9808	32.4213	32.2011	11.4546	0.000356303	11.8652	0.00026805	14.1927	5.34022e-05
28N	23 DPP4-2	2	25.9049			28N	MATN2	23.0237	23.069	23.0464	2.2999	0.203077	2.71051	0.152776	5.03804	0.0304368
28N	24 BHLHE40	1	24.2404			28N	E2F1	28.2422	28.4766	28.3594	7.61293	0.00510833	8.02354	0.00384304	10.3511	0.000765628
28N	24 BHLHE40	2	24.3921			28N	CDH16	24.9906	25.0774	25.034	4.28757	0.0512049	4.69818	0.0385218	7.02571	0.0076745
28N	25 ATP10A	1	28.2541			28N	ALK	32.539	33.2061	32.8726	12.1261	0.000223708	12.5367	0.000168297	14.8642	3.3529e-05
28N	25 ATP10A	2	28.5976			28N	ADRA1B-2	32.0595	32.0704	32.065	11.3185	0.000391548	11.7291	0.000294564	14.0567	5.86845e-05
28N	26 COL26A1-2	1	32.9854			28N	ABTB2-2	28.2618	28.7286	28.4952	7.74876	0.00464933	8.15937	0.00349773	10.4869	0.000696834
28N	26 COL26A1-2	2	32.7955			28N	CHST2-2	25.5211	25.844	25.6825	4.93605	0.0326663	5.34666	0.0245751	7.67419	0.00489597
28N	27 FAM178B	1	31.8733			28N	NPC2	20.8659	21.0477	20.9568	0.210327	0.864342	0.620932	0.65025	2.94846	0.129546
28N	27 FAM178B	2	31.7081			28N	RPP15-3	30.9168	31.2633	31.0901	10.3436	0.000769592	10.7542	0.00057897	13.0818	0.000115345
28N	28 GRM5-2	1	35.5014			28N	RUNX1	24.5319	25.1667	24.8493	4.10285	0.0581995	4.51346	0.0437839	6.84099	0.00872285
28N	28 GRM5-2	2				28N	SLC1A5	26.2857	26.4384	26.362	5.61559	0.0203957	6.0262	0.0153438	8.35373	0.00305687
28N	29 LIPH	1	30.7317			28N	ITGA2	26.3306	26.6517	26.4912	5.7447	0.0186497	6.15531	0.0140303	8.48284	0.00279519
28N	29 LIPH	2	30.8672			28N	SHC4	28.2549	28.3319	28.2934	7.54693	0.00534746	7.95754	0.00402293	10.2851	0.000801469
28N	3 NRCAM	1	27.1775			28N	STAC	30.4102	31.3255	30.8679	10.1214	0.000897751	10.532	0.000675385	12.8595	0.000134553
28N	3 NRCAM	2	26.9153			28N	SPOCD1-2	35.0607	33.931	34.4959	13.7494	7.26137e-05	14.16	5.46278e-05	16.4875	1.08832e-05
28N	30 NELL2	1	26.116			28N	TFCP2L1	23.5463	23.8161	23.6812	2.93477	0.130782	3.34537	0.0983881	5.6729	0.0196013
28N	30 NELL2	2	25.9763			28N	SLC25A21	29.6376	29.9183	29.7779	9.03146	0.00191099	9.44207	0.00143765	11.7696	0.000286416
28N	32 RIN1	1	29.3416			28N	TNC	27.6788	27.587	27.6329	6.88642	0.00845244	7.29702	0.00635883	9.62455	0.00126684
28N	32 RIN1	2	28.3897			28N	TIAM1-2	27.2716	27.6667	27.4692	6.72271	0.0094681	7.13331	0.00712292	9.46085	0.00141906
28N	33 LRP4	1	28.3584			28N	GALNT7	25.3223	25.3872	25.3547	4.60829	0.0409985	5.01889	0.0308435	7.34642	0.00614478
28N	33 LRP4	2	28.373			28N	DUSP6	27.9009	27.4412	27.671	6.92456	0.00823188	7.33517	0.0061929	9.6627	0.00123378
28N	34 VDR	1	26.9915			28N	GALNTL6-2	34.6051	28.9307	31.7679	11.0214	0.000481081	11.432	0.000361921	13.7596	7.21036e-05
28N	34 VDR	2	26.9847			28N	KIAA1549L-2	35.2607	36.3444	35.8025	15.0561	2.93544e-05	15.4667	2.20836e-05	17.7942	4.39959e-06
28N	35 TPO	1	19.4939			28N	GAPDH	20.6967	20.7962	20.7465
28N	35 TPO	2	19.4679			28N	OAZ1	20.3311	20.3406	20.3359
28N	36 TP63	1	27.7722			28N	β-actin	17.9679	18.0487	18.0083
28N	36 TP63	2	27.6817			28T	RUNX2	28.276	27.6426	27.9593	7.60865	0.00512353	7.06359	0.00747563	9.69326	0.00120792
28N	37 TNIK	1	25.3045			28T	MCF2L2-2	32.1193	31.8894	32.0044	11.6537	0.000310368	11.1087	0.000452851	13.7383	7.31721e-05
28N	37 TNIK	2	25.6793			28T	NRP2	27.6798	27.6834	27.6816	7.33093	0.00621114	6.78587	0.00906254	9.41554	0.00146434
28N	38 KRT19	1	24.0952			28T	RASD2-2	28.5172	28.8554	28.6863	8.33566	0.0030954	7.7906	0.00451642	10.4203	0.000729769
28N	38 KRT19	2	24.4257			28T	SFTPB	24.1397	24.0762	24.1079	3.75729	0.073951	3.21223	0.1079	5.8419	0.0174347
28N	39 GAP43	1	31.9808			28T	MET	24.1326	24.1509	24.1417	3.79108	0.0722387	3.24603	0.105402	5.8757	0.017031
28N	39 GAP43	2	32.4213			28T	RFX8	31.8484	32.257	32.0527	11.702	0.000300153	11.157	0.000437947	13.7866	7.07639e-05
28N	4 MATN2	1	23.0237			28T	SHC3	28.2456	28.4506	28.3481	7.99745	0.00391315	7.4524	0.00570959	10.0821	0.000922563
28N	4 MATN2	2	23.069			28T	CDH13	28.8289	28.8349	28.8319	8.48124	0.0027983	7.93618	0.00408293	10.5658	0.000659725
28N	40 E2F1	1	28.2422			28T	DRAXIN	30.6192	30.3572	30.4882	10.1376	0.000887735	9.59253	0.00129527	12.2222	0.000209292
28N	40 E2F1	2	28.4766			28T	RAB27A	24.4614	24.4234	24.4424	4.09177	0.0586483	3.54671	0.0855724	6.17638	0.0138269
28N	41 CDH16	1	24.9906			28T	C8orf44 SGK3	31.3218	31.6278	31.4748	11.1242	0.000448011	10.5791	0.000653683	13.2088	0.000105623
28N	41 CDH16	2	25.0774			28T	HTR7-2	30.8848	30.6812	30.783	10.4324	0.000723668	9.88733	0.00105589	12.517	0.000170612
28N	42 ALK	1	32.539			28T	GABBR2	29.7651	29.3971	29.5811	9.23046	0.00166478	8.6854	0.00242904	11.3151	0.000392487
28N	42 ALK	2	33.2061			28T	DPP4-2	25.6738	25.6938	25.6838	5.33313	0.0248067	4.78807	0.0361949	7.41774	0.00584841
28N	43 ADRA1B-2	1	32.0595			28T	BHLHE40	23.8141	23.6114	23.7127	3.3621	0.097254	2.81704	0.141901	5.44671	0.0229286
28N	43 ADRA1B-2	2	32.0704			28T	ATP10A	28.8594	29.2623	29.0609	8.71023	0.00238758	8.16518	0.00348367	10.7948	0.000562896
28N	44 ABTB2-2	1	28.2618			28T	COL26A1-2	31.876	31.7383	31.8071	11.4565	0.000355845	10.9114	0.000519206	13.5411	8.38939e-05
28N	44 ABTB2-2	2	28.7286			28T	FAM178B	30.8217	30.857	30.8393	10.4887	0.000695964	9.94364	0.00101547	12.5733	0.00016408
28N	45 CHST2-2	1	25.5211			28T	GRM5-2	39.9549	35.727	37.841	17.4903	5.43113e-06	16.9453	7.92444e-06	19.5749	1.28044e-06
28N	45 CHST2-2	2	25.844			28T	LIPH	29.0625	29.5264	29.2944	8.94379	0.00203072	8.39873	0.00296298	11.0284	0.000478762
28N	46 NPC2	1	20.8659			28T	NRCAM	23.8605	24.6314	24.2459	3.89529	0.0672049	3.35023	0.0980572	5.9799	0.0158442
28N	46 NPC2	2	21.0477			28T	NELL2	26.1893	26.4449	26.3171	5.96646	0.0159926	5.4214	0.0233344	8.05107	0.0037704
28N	47 RPP15-3	1	30.9168			28T	RIN1	28.8368	29.3024	29.0696	8.719	0.00237312	8.17394	0.00346256	10.8036	0.000559485
28N	47 RPP15-3	2	31.2633			28T	LRP4	28.4205	28.0036	28.2121	7.86145	0.0043	7.31639	0.00627404	9.94606	0.00101377
28N	48 RUNX1	1	24.5319			28T	VDR	27.5169	27.7284	27.6227	7.27201	0.00647004	6.72695	0.00944029	9.35662	0.00152537
28N	48 RUNX1	2	25.1667			28T	TPO	20.2001	20.0795	20.1398	-0.210834	1.15736	-0.755891	1.68867	1.87378	0.272858
28N	49 SLC1A5	1	26.2857			28T	TP63	28.8416	28.0325	28.4371	8.08641	0.00367914	7.54136	0.00536815	10.171	0.000867393
28N	49 SLC1A5	2	26.4384			28T	TNIK	26.1844	25.9652	26.0748	5.72415	0.0189172	5.1791	0.0276017	7.80877	0.00445992
28N	5 ITGA2	1	26.3306			28T	KRT19	24.9365	24.9641	24.9503	4.59964	0.0412449	4.05458	0.0601796	6.68425	0.00972389
28N	5 ITGA2	2	26.6517			28T	GAP43	31.7061	23.9207	27.8134	7.46277	0.00566868	6.91771	0.00827105	9.54738	0.00133645
28N	50 SHC4	1	28.2549			28T	MATN2	23.5461	23.7776	23.6618	3.31117	0.100749	2.76611	0.147	5.39578	0.0237525
28N	50 SHC4	2	28.3319			28T	E2F1	28.2199	28.7573	28.4886	8.13797	0.00354999	7.59291	0.00517972	10.2226	0.000836945
28N	51 STAC	1	30.4102			28T	CDH16	25.8891	25.7029	25.796	5.44536	0.02295	4.90031	0.0334858	7.52997	0.00541068
28N	51 STAC	2	31.3255			28T	ALK	32.6275	32.2561	32.4418	12.0912	0.000229192	11.5461	0.000334409	14.1758	5.40342e-05
28N	52 SPOCD1-2	1	35.0607			28T	ADRA1B-2	31.9348	31.8242	31.8795	11.5288	0.000338433	10.9838	0.0004938	13.6135	7.97888e-05
28N	52 SPOCD1-2	2	33.931			28T	ABTB2-2	28.6635	28.1263	28.3949	8.04428	0.00378819	7.49922	0.00552726	10.1289	0.000893101
28N	53 TFCP2L1	1	23.5463			28T	CHST2-2	26.2173	25.9147	26.066	5.71539	0.0190325	5.17033	0.0277699	7.8	0.0044871
28N	53 TFCP2L1	2	23.8161			28T	NPC2	19.9998	20.5605	20.2801	-0.0704965	1.05008	-0.615554	1.53215	2.01411	0.247566
28N	54 SLC25A21	1	29.6376			28T	RPP15-3	30.503	30.2498	30.3764	10.0257	0.000959288	9.48069	0.00139968	12.1104	0.000226161
28N	54 SLC25A21	2	29.9183			28T	RUNX1	24.9481	24.7968	24.8725	4.52182	0.0435308	3.97676	0.0635148	6.60643	0.0102628
28N	55 TNC	1	27.6788			28T	SLC1A5	26.0195	26.0589	26.0392	5.68855	0.0193899	5.1435	0.0282913	7.77316	0.00457135
28N	55 TNC	2	27.587			28T	ITGA2	27.2179	27.0503	27.1341	6.78343	0.00907788	6.23837	0.0132453	8.86804	0.0021402
28N	56 TIAM1-2	1	27.2716			28T	SHC4	30.1863	30.417	30.3017	9.95101	0.00101029	9.40596	0.00147409	12.0356	0.000238186
28N	56 TIAM1-2	2	27.6667			28T	STAC	30.9448	31.8837	31.4143	11.0636	0.000467218	10.5186	0.000681707	13.1482	0.000110151
28N	6 GALNT7	1	25.3223			28T	SPOCD1-2	32.7015	32.6225	32.662	12.3113	0.000196751	11.7663	0.000287075	14.396	4.6386e-05
28N	6 GALNT7	2	25.3872			28T	TFCP2L1	24.2426	24.2534	24.248	3.89735	0.0671092	3.35229	0.0979176	5.98196	0.0158216
28N	7 DUSP6	1	27.9009			28T	SLC25A21	30.0963	29.7025	29.8994	9.54873	0.0013352	9.00367	0.00194816	11.6333	0.000314786
28N	7 DUSP6	2	27.4412			28T	TNC	28.663	28.845	28.754	8.40337	0.00295348	7.85831	0.00430935	10.488	0.00069631
28N	8 GALNTL6-2	1	34.6051			28T	TIAM1-2	27.6311	27.9782	27.8047	7.45402	0.00570318	6.90896	0.00832139	9.53863	0.00134458
28N	8 GALNTL6-2	2	28.9307			28T	GALNT7	25.6595	25.1969	25.4282	5.07758	0.0296139	4.53252	0.043209	7.16219	0.00698176
28N	9 KIAA1549L-2	1	35.2607			28T	DUSP6	29.5052	29.8292	29.6672	9.31659	0.00156829	8.77153	0.00228826	11.4012	0.00036974
28N	9 KIAA1549L-2	2	36.3444			28T	GALNTL6-2	35.4019	33.4277	34.4148	14.0641	5.83809e-05	13.5191	8.51823e-05	16.1488	1.37639e-05
28N	OAZ1	1	20.3311			28T	KIAA1549L-2	34.5234	36.646	35.5847	15.2341	2.59473e-05	14.689	3.78591e-05	17.3187	6.11732e-06
28N	OAZ1	2	20.3406			28T	GAPDH	20.3739	20.3274	20.3506
28N	β-actin	1	17.9679			28T	OAZ1	21.1222	20.6692	20.8957
28N	β-actin	2	18.0487			28T	β-actin	18.3488	18.1832	18.266
28T	1 RUNX2	1	28.276			29T	RUNX2	25.7769	25.9792	25.878	4.91343	0.0331826	4.98615	0.0315514	7.34472	0.00615202
28T	1 RUNX2	2	27.6426			29T	MCF2L2-2	31.4296	31.5687	31.4991	10.5346	0.000674191	10.6073	0.00064105	12.9658	0.000124995
28T	10 MCF2L2-2	1	32.1193			29T	NRP2	24.5251	24.5284	24.5268	3.56219	0.0846594	3.63491	0.0804977	5.99348	0.0156958
28T	10 MCF2L2-2	2	31.8894			29T	RASD2-2	25.3082	25.7563	25.5322	4.56765	0.0421696	4.64037	0.0400966	6.99895	0.00781821
28T	11 NRP2	1	27.6798			29T	SFTPB	19.5499	19.6815	19.6157	-1.34885	2.54709	-1.27613	2.42188	1.08244	0.472229
28T	11 NRP2	2	27.6834			29T	MET	21.4559	21.5509	21.5034	0.538804	0.688341	0.611526	0.654504	2.9701	0.127618
28T	12 RASD2-2	1	28.5172			29T	RFX8	29.3834	29.9981	29.6907	8.72613	0.00236142	8.79885	0.00224534	11.1574	0.000437805
28T	12 RASD2-2	2	28.8554			29T	SHC3	25.9177	26.2925	26.1051	5.14049	0.0283503	5.21321	0.0269567	7.57179	0.00525612
28T	13 SFTPB	1	24.1397			29T	CDH13	25.3157	25.6089	25.4623	4.49771	0.0442645	4.57043	0.0420885	6.929	0.0082066
28T	13 SFTPB	2	24.0762			29T	DRAXIN	29.2034	29.5914	29.3974	8.43277	0.0028939	8.50549	0.00275164	10.8641	0.000536527
28T	14 MET	1	24.1326			29T	RAB27A	23.1643	23.2378	23.201	2.23645	0.212208	2.30917	0.201776	4.66774	0.0393432
28T	14 MET	2	24.1509			29T	C8orf44 SGK3	30.9166	30.8277	30.8721	9.90753	0.00104121	9.98025	0.000990023	12.3388	0.000193039
28T	15 GAPDH	1	20.3739			29T	HTR7-2	30.9777	30.4825	30.7301	9.76552	0.00114891	9.83824	0.00109243	12.1968	0.000213007
28T	15 GAPDH	2	20.3274			29T	GABBR2	24.4826	24.4856	24.4841	3.51951	0.0872009	3.59223	0.0829143	5.95081	0.016167
28T	16 RFX8	1	31.8484			29T	DPP4-2	22.2698	22.3726	22.3212	1.35658	0.390507	1.4293	0.37131	3.78787	0.0723996
28T	16 RFX8	2	32.257			29T	BHLHE40	22.772	22.9909	22.8814	1.91685	0.264832	1.98957	0.251813	4.34815	0.0490996
28T	17 SHC3	1	28.2456			29T	ATP10A	26.4222	26.7146	26.5684	5.60381	0.020563	5.67653	0.0195521	8.0351	0.00381236
28T	17 SHC3	2	28.4506			29T	COL26A1-2	30.6935	31.078	30.8857	9.92115	0.00103142	9.99388	0.000980717	12.3524	0.000191224
28T	18 CDH13	1	28.8289			29T	FAM178B	28.5286	28.8146	28.6716	7.70698	0.00478594	7.7797	0.00455068	10.1383	0.00088731
28T	18 CDH13	2	28.8349			29T	GRM5-2	32.6635	33.2252	32.9444	11.9798	0.000247587	12.0525	0.000235417	14.4111	4.59025e-05
28T	19 DRAXIN	1	30.6192			29T	LIPH	24.4592	24.224	24.3416	3.37698	0.0962559	3.4497	0.0915242	5.80827	0.0178458
28T	19 DRAXIN	2	30.3572			29T	NRCAM	23.6677	23.6164	23.642	2.67744	0.156318	2.75017	0.148634	5.10874	0.0289812
28T	2 RAB27A	1	24.4614			29T	NELL2	22.5693	22.4568	22.5131	1.54848	0.34187	1.6212	0.325064	3.97977	0.0633824
28T	2 RAB27A	2	24.4234			29T	RIN1	26.7368	27.131	26.9339	5.96931	0.0159609	6.04203	0.0151763	8.4006	0.00295914
28T	20 C8orf44 SGK3	1	31.3218			29T	LRP4	23.4901	23.6337	23.5619	2.59732	0.165245	2.67004	0.157122	5.02861	0.0306364
28T	20 C8orf44 SGK3	2	31.6278			29T	VDR	26.2522	26.526	26.3891	5.42452	0.0232839	5.49725	0.0221393	7.85582	0.00431682
28T	21 HTR7-2	1	30.8848			29T	TPO	27.9558	27.595	27.7754	6.81078	0.00890742	6.8835	0.00846956	9.24207	0.00165143
28T	21 HTR7-2	2	30.6812			29T	TP63	28.0384	27.7924	27.9154	6.95082	0.0080834	7.02354	0.00768604	9.38211	0.00149866
28T	22 GABBR2	1	29.7651			29T	TNIK	25.4867	25.4513	25.469	4.50438	0.0440602	4.5771	0.0418943	6.93567	0.00816872
28T	22 GABBR2	2	29.3971			29T	KRT19	22.1823	22.1409	22.1616	1.197	0.436182	1.26972	0.41474	3.62829	0.0808678
28T	23 DPP4-2	1	25.6738			29T	GAP43	23.832	23.9041	23.868	2.90344	0.133653	2.97616	0.127083	5.33473	0.0247792
28T	23 DPP4-2	2	25.6938			29T	MATN2	25.7994	25.9701	25.8848	4.92017	0.033028	4.99289	0.0314045	7.35146	0.00612337
28T	24 BHLHE40	1	23.8141			29T	E2F1	28.5908	28.6308	28.6108	7.64622	0.00499181	7.71894	0.00474642	10.0775	0.000925478
28T	24 BHLHE40	2	23.6114			29T	CDH16	32.0075	32.2806	32.1441	11.1795	0.000431166	11.2522	0.000409971	13.6108	7.99378e-05
28T	25 ATP10A	1	28.8594			29T	ALK	29.7431	29.3545	29.5488	8.58423	0.00260549	8.65695	0.00247741	11.0155	0.000483055
28T	25 ATP10A	2	29.2623			29T	ADRA1B-2	27.964	27.9109	27.9375	6.97288	0.00796072	7.04561	0.0075694	9.40418	0.00147591
28T	26 COL26A1-2	1	31.876			29T	ABTB2-2	25.821	26.0719	25.9465	4.98186	0.0316453	5.05458	0.0300897	7.41316	0.00586702
28T	26 COL26A1-2	2	31.7383			29T	CHST2-2	23.3001	23.3814	23.3407	2.37615	0.192623	2.44887	0.183154	4.80744	0.0357122
28T	27 FAM178B	1	30.8217			29T	NPC2	18.258	18.4261	18.3421	-2.62253	6.15829	-2.54981	5.85556	-0.191237	1.14174
28T	27 FAM178B	2	30.857			29T	RPP15-3	24.9395	24.9407	24.9401	3.97554	0.0635685	4.04827	0.0604437	6.40684	0.0117856
28T	28 GRM5-2	1	39.9549			29T	RUNX1	22.7908	22.8345	22.8126	1.84805	0.277768	1.92077	0.264113	4.27934	0.0514979
28T	28 GRM5-2	2	35.727			29T	SLC1A5	25.2244	25.5704	25.3974	4.43283	0.0463004	4.50555	0.0440244	6.86412	0.00858406
28T	29 LIPH	1	29.0625			29T	ITGA2	23.1025	23.4534	23.2779	2.31335	0.201193	2.38607	0.191303	4.74464	0.037301
28T	29 LIPH	2	29.5264			29T	SHC4	30.0448	29.174	29.6094	8.64483	0.00249832	8.71755	0.00237551	11.0761	0.000463187
28T	3 NRCAM	1	23.8605			29T	STAC	27.3093	27.2014	27.2553	6.29074	0.0127732	6.36346	0.0121453	8.72203	0.00236814
28T	3 NRCAM	2	24.6314			29T	SPOCD1-2	29.9509	29.5979	29.7744	8.8098	0.00222837	8.88252	0.00211883	11.2411	0.000413138
28T	30 NELL2	1	26.1893			29T	TFCP2L1	29.1081	26.5174	27.8127	6.84814	0.00867967	6.92087	0.008253	9.27944	0.0016092
28T	30 NELL2	2	26.4449			29T	SLC25A21	29.047	29.6784	29.3627	8.3981	0.00296429	8.47082	0.00281857	10.8294	0.000549577
28T	32 RIN1	1	28.8368			29T	TNC	28.1149	28.4265	28.2707	7.30613	0.00631884	7.37885	0.00600822	9.73742	0.00117151
28T	32 RIN1	2	29.3024			29T	TIAM1-2	24.8964	28.9502	26.9233	5.9587	0.0160788	6.03142	0.0152884	8.38999	0.00298099
28T	33 LRP4	1	28.4205			29T	GALNT7	23.4142	23.4685	23.4414	2.47679	0.179643	2.54951	0.170813	4.90808	0.0333058
28T	33 LRP4	2	28.0036			29T	DUSP6	27.563	27.8287	27.6958	6.73126	0.00941216	6.80398	0.00894948	9.16255	0.00174501
28T	34 VDR	1	27.5169			29T	GALNTL6-2	33.0932	34.44	33.7666	12.802	0.000140028	12.8747	0.000133145	15.2333	2.59611e-05
28T	34 VDR	2	27.7284			29T	KIAA1549L-2	33.5328	34.2508	33.8918	12.9273	0.000128383	13	0.000122072	15.3585	2.38022e-05
28T	35 TPO	1	20.2001			29T	GAPDH	20.9344	20.9947	20.9646
28T	35 TPO	2	20.0795			29T	OAZ1	20.8167	20.9671	20.8919
28T	36 TP63	1	28.8416			29T	β-actin	18.4149	18.6517	18.5333
28T	36 TP63	2	28.0325
28T	37 TNIK	1	26.1844
28T	37 TNIK	2	25.9652
28T	38 KRT19	1	24.9365
28T	38 KRT19	2	24.9641
28T	39 GAP43	1	31.7061
28T	39 GAP43	2	23.9207
28T	4 MATN2	1	23.5461
28T	4 MATN2	2	23.7776
28T	40 E2F1	1	28.2199
28T	40 E2F1	2	28.7573
28T	41 CDH16	1	25.8891
28T	41 CDH16	2	25.7029
28T	42 ALK	1	32.6275
28T	42 ALK	2	32.2561
28T	43 ADRA1B-2	1	31.9348
28T	43 ADRA1B-2	2	31.8242
28T	44 ABTB2-2	1	28.6635
28T	44 ABTB2-2	2	28.1263
28T	45 CHST2-2	1	26.2173
28T	45 CHST2-2	2	25.9147
28T	46 NPC2	1	19.9998
28T	46 NPC2	2	20.5605
28T	47 RPP15-3	1	30.503
28T	47 RPP15-3	2	30.2498
28T	48 RUNX1	1	24.9481
28T	48 RUNX1	2	24.7968
28T	49 SLC1A5	1	26.0195
28T	49 SLC1A5	2	26.0589
28T	5 ITGA2	1	27.2179
28T	5 ITGA2	2	27.0503
28T	50 SHC4	1	30.1863
28T	50 SHC4	2	30.417
28T	51 STAC	1	30.9448
28T	51 STAC	2	31.8837
28T	52 SPOCD1-2	1	32.7015
28T	52 SPOCD1-2	2	32.6225
28T	53 TFCP2L1	1	24.2426
28T	53 TFCP2L1	2	24.2534
28T	54 SLC25A21	1	30.0963
28T	54 SLC25A21	2	29.7025
28T	55 TNC	1	28.663
28T	55 TNC	2	28.845
28T	56 TIAM1-2	1	27.6311
28T	56 TIAM1-2	2	27.9782
28T	6 GALNT7	1	25.6595
28T	6 GALNT7	2	25.1969
28T	7 DUSP6	1	29.5052
28T	7 DUSP6	2	29.8292
28T	8 GALNTL6-2	1	35.4019
28T	8 GALNTL6-2	2	33.4277
28T	9 KIAA1549L-2	1	34.5234
28T	9 KIAA1549L-2	2	36.646
28T	OAZ1	1	21.1222
28T	OAZ1	2	20.6692
28T	β-actin	1	18.3488
28T	β-actin	2	18.1832
29T	1 RUNX2	1	25.7769
29T	1 RUNX2	2	25.9792
29T	10 MCF2L2-2	1	31.4296
29T	10 MCF2L2-2	2	31.5687
29T	11 NRP2	1	24.5251
29T	11 NRP2	2	24.5284
29T	12 RASD2-2	1	25.3082
29T	12 RASD2-2	2	25.7563
29T	13 SFTPB	1	19.5499
29T	13 SFTPB	2	19.6815
29T	14 MET	1	21.4559
29T	14 MET	2	21.5509
29T	15 GAPDH	1	20.9344
29T	15 GAPDH	2	20.9947
29T	16 RFX8	1	29.3834
29T	16 RFX8	2	29.9981
29T	17 SHC3	1	25.9177
29T	17 SHC3	2	26.2925
29T	18 CDH13	1	25.3157
29T	18 CDH13	2	25.6089
29T	19 DRAXIN	1	29.2034
29T	19 DRAXIN	2	29.5914
29T	2 RAB27A	1	23.1643
29T	2 RAB27A	2	23.2378
29T	20 C8orf44 SGK3	1	30.9166
29T	20 C8orf44 SGK3	2	30.8277
29T	21 HTR7-2	1	30.9777
29T	21 HTR7-2	2	30.4825
29T	22 GABBR2	1	24.4826
29T	22 GABBR2	2	24.4856
29T	23 DPP4-2	1	22.2698
29T	23 DPP4-2	2	22.3726
29T	24 BHLHE40	1	22.772
29T	24 BHLHE40	2	22.9909
29T	25 ATP10A	1	26.4222
29T	25 ATP10A	2	26.7146
29T	26 COL26A1-2	1	30.6935
29T	26 COL26A1-2	2	31.078
29T	27 FAM178B	1	28.5286
29T	27 FAM178B	2	28.8146
29T	28 GRM5-2	1	32.6635
29T	28 GRM5-2	2	33.2252
29T	29 LIPH	1	24.4592
29T	29 LIPH	2	24.224
29T	3 NRCAM	1	23.6677
29T	3 NRCAM	2	23.6164
29T	30 NELL2	1	22.5693
29T	30 NELL2	2	22.4568
29T	32 RIN1	1	26.7368
29T	32 RIN1	2	27.131
29T	33 LRP4	1	23.4901
29T	33 LRP4	2	23.6337
29T	34 VDR	1	26.2522
29T	34 VDR	2	26.526
29T	35 TPO	1	27.9558
29T	35 TPO	2	27.595
29T	36 TP63	1	28.0384
29T	36 TP63	2	27.7924
29T	37 TNIK	1	25.4867
29T	37 TNIK	2	25.4513
29T	38 KRT19	1	22.1823
29T	38 KRT19	2	22.1409
29T	39 GAP43	1	23.832
29T	39 GAP43	2	23.9041
29T	4 MATN2	1	25.7994
29T	4 MATN2	2	25.9701
29T	40 E2F1	1	28.5908
29T	40 E2F1	2	28.6308
29T	41 CDH16	1	32.0075
29T	41 CDH16	2	32.2806
29T	42 ALK	1	29.7431
29T	42 ALK	2	29.3545
29T	43 ADRA1B-2	1	27.964
29T	43 ADRA1B-2	2	27.9109
29T	44 ABTB2-2	1	25.821
29T	44 ABTB2-2	2	26.0719
29T	45 CHST2-2	1	23.3001
29T	45 CHST2-2	2	23.3814
29T	46 NPC2	1	18.258
29T	46 NPC2	2	18.4261
29T	47 RPP15-3	1	24.9395
29T	47 RPP15-3	2	24.9407
29T	48 RUNX1	1	22.7908
29T	48 RUNX1	2	22.8345
29T	49 SLC1A5	1	25.2244
29T	49 SLC1A5	2	25.5704
29T	5 ITGA2	1	23.1025
29T	5 ITGA2	2	23.4534
29T	50 SHC4	1	30.0448
29T	50 SHC4	2	29.174
29T	51 STAC	1	27.3093
29T	51 STAC	2	27.2014
29T	52 SPOCD1-2	1	29.9509
29T	52 SPOCD1-2	2	29.5979
29T	53 TFCP2L1	1	29.1081
29T	53 TFCP2L1	2	26.5174
29T	54 SLC25A21	1	29.047
29T	54 SLC25A21	2	29.6784
29T	55 TNC	1	28.1149
29T	55 TNC	2	28.4265
29T	56 TIAM1-2	1	24.8964
29T	56 TIAM1-2	2	28.9502
29T	6 GALNT7	1	23.4142
29T	6 GALNT7	2	23.4685
29T	7 DUSP6	1	27.563
29T	7 DUSP6	2	27.8287
29T	8 GALNTL6-2	1	33.0932
29T	8 GALNTL6-2	2	34.44
29T	9 KIAA1549L-2	1	33.5328
29T	9 KIAA1549L-2	2	34.2508
29T	OAZ1	1	20.8167
29T	OAZ1	2	20.9671
29T	β-actin	1	18.4149
29T	β-actin	2	18.6517

[truncated: 31 more sheets: P10, P11, P12, P13, P14, P15, P16, P17, P18, P19, P20, P21, P22, P23, P24, P25, P26, P27, P28, P29 …]
